# Supplementary material for: Transcriptome analysis identifies differentially expressed genes involved in the metabolic regulatory network of progenies from the cross of low phytic acid GmMIPS1 and GmIPK1 soybean mutants
Source: Research Square preprint supplement (doi:10.21203/rs.3.rs-112462/v1), 2020-12-01
Supplement: Supplementary file 1 [file 0fd14550128a0f64013c4a4d.docx]

Table 3 Primers of qPCR

| Gene | Size | Sequence(5’-3’) |
| --- | --- | --- |
| | Glyma.11G238800 | | --- | | 138 bp | F: GGTGGAAACAACGGCTCAAC |
|  |  | R: GGACCCAACTCGGATAGCTG |
| Glyma.14G072200 | 100 bp | F: GACGCAGCTGACTGGGTTTA |
|  |  | R: GTATGCGGACCACTTTCCCA |
| Glyma.16G065700 | 277 bp | F: AGCAAATGCTTTGTTGAAGTGGAA |
|  |  | R: AGTGTTGAGATTGGATAAGGAACCA |
| Glyma.12G210600 | 159 bp | F: ACCTTCAAGAAGCTTGTGGCT |
|  |  | R: TGTCAAACAATTCCTTATCCTTCCA |
| Glyma.08G109300 | 132 bp | F: AGCACATGACCGAGCTCAAA |
|  |  | R: ACGAAGGTGCCATGTAAGCA |
| Glyma.12G232500 | 84 bp | F: GGAATCGTGTTAGGTTTAATTCCCA |
|  |  | R: CAACTGATCACCTCGTCGGT |
| Glyma.16G214900 | 286 bp | F: TCATCGAAGGCAAGTTTAAAGAGT |
|  |  | R: TAAGCTTCCTGCAACCAGCA |
| Glyma.09G073600 | 204 bp | F: TGGCCTCATCGAGACCTACA |
|  |  | R: CCACCATTGCATGTGGCAAA |
| *ACT11* | 213 bp | F: CAACCCAAAGGTCAACAG |
|  |  | R: CAGCGAGATCCAAACGAA |
