# Supplementary material for: Transcriptome analysis identifies differentially expressed genes involved in the metabolic regulatory network of progenies from the cross of low phytic acid GmMIPS1 and GmIPK1 soybean mutants
Source: Research Square preprint supplement (doi:10.21203/rs.3.rs-112462/v1), 2020-12-01
Supplement: Supplementary file 5 [file 876de49f71aac316adf32259.xlsx]

## Sheet: Sheet1
DEGs involved in PA metabolism
GeneID	log2Ratio(2mlpa-1/2MWT-1)	Up-Down-Regulation(2mlpa-1/2MWT-1)	P-value	FDR	log2Ratio(2mlpa-2/2MWT-2)	Up-Down-Regulation(2mlpa-2/2MWT-2)	P-value	FDR	log2Ratio(2mlpa-3/2MWT-3)	Up-Down-Regulation(2mlpa-3/2MWT-3)	P-value	FDR	log2Ratio(2mlpa-4/2MWT-4)	Up-Down-Regulation(2mlpa-4/2MWT-4)	P-value	FDR	log2Ratio(2mlpa-5/2MWT-5)	Up-Down-Regulation(2mlpa-5/2MWT-5)			Length	Pathway	GO Component	GO Function	GO Process	Blast nr
Glyma.04G251700	-	-	-	-	-	-	-	-	1.44188	up	2.38072e-05	0.00169904	-	-	-	-	-	-	-	-	1819	ko00562//Inositol phosphate metabolism;ko03008//Ribosome biogenesis in eukaryotes;ko04070//Phosphatidylinositol signaling system;ko01100//Metabolic pathways;ko04144//Endocytosis;ko04712//Circadian rhythm - plant	-	-	-	gi|356509438|ref|XP_003523456.1|/0/PREDICTED: phosphatidylinositol 4-phosphate 5-kinase 4-like [Glycine max]
Glyma.05G070400	1.14792	up	0.000742523	0.0100166	-	-	-	-	-	-	-	-	-	-	-	-	-	-	-	-	4016	ko00562//Inositol phosphate metabolism;ko04070//Phosphatidylinositol signaling system;ko01100//Metabolic pathways	-	-	GO:0046488//phosphatidylinositol metabolic process;GO:0043647//inositol phosphate metabolic process;GO:0044707;GO:0044723;GO:0001101//response to acid chemical	gi|947109262|gb|KRH57588.1|;gi|947109263|gb|KRH57589.1|;gi|571454088|ref|XP_006579677.1|;gi|947109261|gb|KRH57587.1|/0;0;0;0/hypothetical protein GLYMA_05G070400 [Glycine max];hypothetical protein GLYMA_05G070400 [Glycine max];PREDICTED: type I inositol polyphosphate 5-phosphatase 2-like [Glycine max];hypothetical protein GLYMA_05G070400 [Glycine max]
Glyma.07G013900	-	-	-	-	-3.23994	down	4.47858e-06	0.000493988	-3.2762	down	5.75036e-06	0.000479904	-2.59945	down	3.98411e-05	0.00338025	-	-	-	-	1625	ko00562//Inositol phosphate metabolism;ko00053//Ascorbate and aldarate metabolism	GO:0044424	GO:0046914//transition metal ion binding;GO:0016701//oxidoreductase activity, acting on single donors with incorporation of molecular oxygen	GO:0006020//inositol metabolic process	gi|947098691|gb|KRH47183.1|;gi|947098690|gb|KRH47182.1|;gi|947098692|gb|KRH47184.1|/4.8486e-172;0;0/hypothetical protein GLYMA_07G013900 [Glycine max];hypothetical protein GLYMA_07G013900 [Glycine max];hypothetical protein GLYMA_07G013900 [Glycine max]
Glyma.17G153000	-1.48364	down	0.000283786	0.00465009	-	-	-	-	-	-	-	-	-1.4095	down	0.00123678	0.0467421	-	-	-	-	2721	ko00562//Inositol phosphate metabolism;ko04070//Phosphatidylinositol signaling system;ko01100//Metabolic pathways	-	-	GO:0046488//phosphatidylinositol metabolic process;GO:0043647//inositol phosphate metabolic process	gi|947054852|gb|KRH04305.1|;gi|356563443|ref|XP_003549972.1|/0;0/hypothetical protein GLYMA_17G153000 [Glycine max];PREDICTED: type I inositol polyphosphate 5-phosphatase 2-like [Glycine max]
Glyma.18G027200	-1.0845	down	0.000212599	0.00366934	-	-	-	-	-	-	-	-	-	-	-	-	-	-	-	-	2057	ko00562//Inositol phosphate metabolism;ko04070//Phosphatidylinositol signaling system;ko01100//Metabolic pathways	-	GO:0060089;GO:0046872//metal ion binding;GO:0004629//phospholipase C activity	GO:0007165//signal transduction;GO:0044238//primary metabolic process	gi|356568316|ref|XP_003552358.1|;gi|571542533|ref|XP_006601952.1|/0;0/PREDICTED: phosphoinositide phospholipase C 6 isoform X2 [Glycine max];PREDICTED: phosphoinositide phospholipase C 6 isoform X1 [Glycine max]
Glyma.01G016700	8.66729	up	1.87058e-42	3.15427e-39	11.3041	up	2.49791e-38	8.07275e-35	9.9449	up	6.11135e-24	7.46685e-21	10.4147	up	4.45158e-26	8.26826e-23	9.90269	up	1.85463e-15	1.70632e-12	1074	ko00562//Inositol phosphate metabolism;ko04070//Phosphatidylinositol signaling system;ko01100//Metabolic pathways	GO:0044464	GO:0046872//metal ion binding;GO:0051766//inositol trisphosphate kinase activity;GO:0051765//inositol tetrakisphosphate kinase activity;GO:0032550	GO:0043647//inositol phosphate metabolic process	gi|947126543|gb|KRH74397.1|/0/hypothetical protein GLYMA_01G016700 [Glycine max]
Glyma.05G224500	-	-	-	-	-	-	-	-	-	-	-	-	-	-	-	-	3.31817	up	0.00261802	0.0187987	1497	ko00562//Inositol phosphate metabolism;ko00053//Ascorbate and aldarate metabolism	GO:0044424	GO:0046914//transition metal ion binding;GO:0016701//oxidoreductase activity, acting on single donors with incorporation of molecular oxygen	GO:0048646//anatomical structure formation involved in morphogenesis;GO:0006020//inositol metabolic process	gi|947111847|gb|KRH60173.1|;gi|947111848|gb|KRH60174.1|;gi|947111846|gb|KRH60172.1|;gi|734310448|gb|KHM99828.1|/2.07501e-180;0;0;0/hypothetical protein GLYMA_05G224500 [Glycine max];hypothetical protein GLYMA_05G224500 [Glycine max];hypothetical protein GLYMA_05G224500 [Glycine max];Inositol oxygenase 4 [Glycine soja]
Glyma.03G186300	-	-	-	-	-	-	-	-	-	-	-	-	-	-	-	-	2.97317	up	0.00574406	0.0325787	3274	ko00562//Inositol phosphate metabolism;ko04070//Phosphatidylinositol signaling system;ko01100//Metabolic pathways;ko04144//Endocytosis	-	GO:0016307//phosphatidylinositol phosphate kinase activity;GO:0032550	GO:0046488//phosphatidylinositol metabolic process	gi|571446255|ref|XP_006577040.1|/0/PREDICTED: phosphatidylinositol 4-phosphate 5-kinase 9-like [Glycine max]
Glyma.07G266200	-	-	-	-	-	-	-	-	-	-	-	-	-	-	-	-	2.87174	up	0.00144026	0.0122474	1525	ko00562//Inositol phosphate metabolism;ko00053//Ascorbate and aldarate metabolism;ko04070//Phosphatidylinositol signaling system;ko01100//Metabolic pathways;ko01110//Biosynthesis of secondary metabolites	GO:0044444;GO:0016020//membrane	GO:0070456	GO:0019852//L-ascorbic acid metabolic process;GO:0046488//phosphatidylinositol metabolic process;GO:0009628//response to abiotic stimulus;GO:0006950//response to stress	gi|734423661|gb|KHN42287.1|;gi|947102679|gb|KRH51171.1|/0;0/Inositol monophosphatase 3 [Glycine soja] ;hypothetical protein GLYMA_07G266200 [Glycine max]
Glyma.05G180600	-	-	-	-	-	-	-	-	-	-	-	-	-	-	-	-	2.68211	up	6.05899e-07	4.08531e-05	1864	ko00562//Inositol phosphate metabolism;ko01100//Metabolic pathways;ko01110//Biosynthesis of secondary metabolites	GO:0044424	GO:0016872//intramolecular lyase activity	GO:0009642//response to light intensity;GO:0009620//response to fungus;GO:0000302//response to reactive oxygen species;GO:0006020//inositol metabolic process;GO:0009617//response to bacterium;GO:0006658//phosphatidylserine metabolic process;GO:0002252;GO:0007275//multicellular organismal development;GO:0003006//developmental process involved in reproduction;GO:0032958//inositol phosphate biosynth…	gi|947111062|gb|KRH59388.1|;gi|947111064|gb|KRH59390.1|;gi|947111063|gb|KRH59389.1|;gi|356512722|ref|XP_003525065.1|/0;0;0;0/hypothetical protein GLYMA_05G180600 [Glycine max];hypothetical protein GLYMA_05G180600 [Glycine max];hypothetical protein GLYMA_05G180600 [Glycine max];PREDICTED: inositol-3-phosphate synthase [Glycine max]
Glyma.17G259400	-	-	-	-	-	-	-	-	-	-	-	-	-	-	-	-	2.53044	up	0.001405	0.0120444	984	ko00562//Inositol phosphate metabolism;ko04070//Phosphatidylinositol signaling system;ko04145//Phagosome	-	GO:0043169//cation binding	-	gi|734351221|gb|KHN12631.1|/0/WD repeat and FYVE domain-containing protein 3 [Glycine soja]
Glyma.10G218400	-	-	-	-	-	-	-	-	-	-	-	-	-	-	-	-	2.40815	up	5.02208e-06	0.000208493	5471	ko00562//Inositol phosphate metabolism;ko04070//Phosphatidylinositol signaling system;ko04145//Phagosome	-	GO:0016301//kinase activity;GO:0032550	GO:0046488//phosphatidylinositol metabolic process;GO:0019538//protein metabolic process	gi|571484133|ref|XP_006589464.1|/0/PREDICTED: putative 1-phosphatidylinositol-3-phosphate 5-kinase FAB1D isoform X1 [Glycine max]
Glyma.06G096300	-	-	-	-	-	-	-	-	-	-	-	-	-	-	-	-	2.06481	up	7.45744e-05	0.00152141	3011	ko00562//Inositol phosphate metabolism;ko04140//Regulation of autophagy;ko04070//Phosphatidylinositol signaling system;ko01100//Metabolic pathways;ko04145//Phagosome	-	GO:0032550;GO:0052742	GO:0016192//vesicle-mediated transport;GO:0048017//inositol lipid-mediated signaling;GO:0006661//phosphatidylinositol biosynthetic process;GO:0006970//response to osmotic stress;GO:0009555//pollen development	gi|734339581|gb|KHN08996.1|/0/Phosphatidylinositol 3-kinase, nodule isoform [Glycine soja]
Glyma.19G158700	-	-	-	-	-	-	-	-	-	-	-	-	-	-	-	-	2.01612	up	0.00480698	0.0287673	2946	ko00562//Inositol phosphate metabolism;ko04070//Phosphatidylinositol signaling system;ko01100//Metabolic pathways	-	-	GO:0046488//phosphatidylinositol metabolic process	gi|734317079|gb|KHN02561.1|;gi|955389963|ref|XP_014627585.1|;gi|947045932|gb|KRG95561.1|;gi|947045936|gb|KRG95565.1|;gi|947045933|gb|KRG95562.1|/0;0;0;0;0/Type I inositol-1,4,5-trisphosphate 5-phosphatase CVP2 [Glycine soja] ;PREDICTED: type I inositol polyphosphate 5-phosphatase 4-like isoform X1 [Glycine max];hypothetical protein GLYMA_19G158700 [Glycine max];hypothetical protein GLYMA_19G15870…
Glyma.06G013800	-	-	-	-	-	-	-	-	-	-	-	-	-	-	-	-	1.96273	up	2.11161e-07	1.8474e-05	6537	ko00562//Inositol phosphate metabolism;ko04070//Phosphatidylinositol signaling system;ko01100//Metabolic pathways	GO:0005911//cell-cell junction;GO:0016020//membrane	GO:0016772//transferase activity, transferring phosphorus-containing groups;GO:1902936;GO:0003779//actin binding	GO:0046488//phosphatidylinositol metabolic process;GO:0048017//inositol lipid-mediated signaling;GO:0006464//cellular protein modification process	gi|947103164|gb|KRH51547.1|;gi|947103165|gb|KRH51548.1|/0;0/hypothetical protein GLYMA_06G013800 [Glycine max];hypothetical protein GLYMA_06G013800 [Glycine max]
Glyma.11G041600	-	-	-	-	-	-	-	-	-	-	-	-	-	-	-	-	1.95005	up	0.00176779	0.0141747	3762	ko00562//Inositol phosphate metabolism;ko04070//Phosphatidylinositol signaling system;ko01100//Metabolic pathways	-	-	GO:0046488//phosphatidylinositol metabolic process;GO:0043647//inositol phosphate metabolic process;GO:0044707;GO:0044723;GO:0001101//response to acid chemical	gi|571487238|ref|XP_006590604.1|;gi|734408756|gb|KHN34863.1|;gi|947079477|gb|KRH28266.1|/0;0;0/PREDICTED: type I inositol polyphosphate 5-phosphatase 2-like [Glycine max];Type I inositol-1,4,5-trisphosphate 5-phosphatase 2 [Glycine soja];hypothetical protein GLYMA_11G041600 [Glycine max]
Glyma.01G200500	-	-	-	-	-	-	-	-	-	-	-	-	-	-	-	-	1.87656	up	0.000557545	0.00632527	2276	ko00562//Inositol phosphate metabolism;ko04070//Phosphatidylinositol signaling system;ko01100//Metabolic pathways	-	-	-	gi|947129377|gb|KRH77231.1|/0/hypothetical protein GLYMA_01G200500 [Glycine max]
Glyma.20G173200	-	-	-	-	-	-	-	-	-	-	-	-	-	-	-	-	1.86557	up	0.000758277	0.0078358	5623	ko00562//Inositol phosphate metabolism;ko04070//Phosphatidylinositol signaling system;ko04145//Phagosome	-	GO:0016301//kinase activity;GO:0032550	GO:0046488//phosphatidylinositol metabolic process;GO:0019538//protein metabolic process	gi|571568246|ref|XP_006606196.1|/0/PREDICTED: putative 1-phosphatidylinositol-3-phosphate 5-kinase FAB1D isoform X1 [Glycine max]
Glyma.18G018600	-1.30207	down	2.08716e-10	1.94446e-08	-	-	-	-	-	-	-	-	-	-	-	-	1.76513	up	0.00743043	0.0389493	2095	ko00562//Inositol phosphate metabolism;ko01100//Metabolic pathways;ko01110//Biosynthesis of secondary metabolites	-	GO:0016872//intramolecular lyase activity	GO:0009642//response to light intensity;GO:0009620//response to fungus;GO:0000302//response to reactive oxygen species;GO:0006020//inositol metabolic process;GO:0009617//response to bacterium;GO:0006658//phosphatidylserine metabolic process;GO:0002252;GO:0007275//multicellular organismal development;GO:0003006//developmental process involved in reproduction;GO:0032958//inositol phosphate biosynth…	gi|947048073|gb|KRG97601.1|;gi|947048074|gb|KRG97602.1|;gi|84311235|gb|ABC55420.1|;gi|947048072|gb|KRG97600.1|/0;0;0;0/hypothetical protein GLYMA_18G018600 [Glycine max];hypothetical protein GLYMA_18G018600 [Glycine max];myo-inositol-1-phosphate synthase [Glycine max];hypothetical protein GLYMA_18G018600 [Glycine max]
Glyma.20G013500	-	-	-	-	-	-	-	-	-	-	-	-	-	-	-	-	1.67385	up	5.93421e-06	0.000236053	6424	ko00562//Inositol phosphate metabolism;ko04070//Phosphatidylinositol signaling system;ko04145//Phagosome	-	GO:0043169//cation binding;GO:0016301//kinase activity;GO:0032550	GO:0046488//phosphatidylinositol metabolic process;GO:0019538//protein metabolic process	gi|955392583|ref|XP_014628145.1|/0/PREDICTED: putative 1-phosphatidylinositol-3-phosphate 5-kinase FAB1C [Glycine max]
Glyma.17G222600	-	-	-	-	-	-	-	-	-	-	-	-	-	-	-	-	1.59101	up	0.00251683	0.0182652	4395	ko00562//Inositol phosphate metabolism;ko04070//Phosphatidylinositol signaling system	-	-	-	gi|947055910|gb|KRH05363.1|/0/hypothetical protein GLYMA_17G222600 [Glycine max]
Glyma.07G273800	-	-	-	-	-	-	-	-	-	-	-	-	-	-	-	-	1.5463	up	0.00852077	0.0428788	3844	ko00562//Inositol phosphate metabolism;ko04070//Phosphatidylinositol signaling system;ko01100//Metabolic pathways	-	GO:0046030//inositol trisphosphate phosphatase activity	GO:0009888//tissue development;GO:0001101//response to acid chemical;GO:0046488//phosphatidylinositol metabolic process;GO:0009416//response to light stimulus;GO:0031667//response to nutrient levels;GO:0009756//carbohydrate mediated signaling;GO:0048878//chemical homeostasis;GO:0044723;GO:0022622//root system development;GO:0006950//response to stress	gi|571468135|ref|XP_006584139.1|/0/PREDICTED: type I inositol polyphosphate 5-phosphatase 12-like isoform X2 [Glycine max]
Glyma.07G216600	-	-	-	-	-	-	-	-	-	-	-	-	-	-	-	-	1.52953	up	7.62192e-05	0.00154393	6440	ko00562//Inositol phosphate metabolism;ko04070//Phosphatidylinositol signaling system;ko04145//Phagosome	-	GO:0043169//cation binding;GO:0016301//kinase activity;GO:0032550	GO:0046488//phosphatidylinositol metabolic process;GO:0019538//protein metabolic process	gi|955332007|ref|XP_014633654.1|;gi|947101860|gb|KRH50352.1|/0;0/PREDICTED: putative 1-phosphatidylinositol-3-phosphate 5-kinase FAB1C [Glycine max];hypothetical protein GLYMA_07G216600 [Glycine max]
Glyma.17G102800	-1.1589	down	7.44618e-07	3.1118e-05	-	-	-	-	-	-	-	-	-	-	-	-	1.52452	up	0.000202853	0.00311554	4611	ko00562//Inositol phosphate metabolism;ko04070//Phosphatidylinositol signaling system	-	-	-	gi|955378570|ref|XP_014625002.1|/0/PREDICTED: formin-like protein 20 [Glycine max]
Glyma.06G089800	-	-	-	-	-	-	-	-	-	-	-	-	-	-	-	-	1.42299	up	8.19345e-05	0.00162169	2250	ko00562//Inositol phosphate metabolism;ko04070//Phosphatidylinositol signaling system;ko01100//Metabolic pathways	GO:0044464	GO:0046872//metal ion binding;GO:0051766//inositol trisphosphate kinase activity;GO:0051765//inositol tetrakisphosphate kinase activity;GO:0032550	GO:0043647//inositol phosphate metabolic process	gi|351721983|ref|NP_001237484.1|/0/inositol phosphate kinase [Glycine max]
Glyma.08G276400	-	-	-	-	-	-	-	-	-	-	-	-	-	-	-	-	1.3953	up	0.000200855	0.00309554	3700	ko00562//Inositol phosphate metabolism;ko00640//Propanoate metabolism;ko00410//beta-Alanine metabolism;ko01100//Metabolic pathways;ko00280//Valine, leucine and isoleucine degradation	-	GO:0016620//oxidoreductase activity, acting on the aldehyde or oxo group of donors, NAD or NADP as acceptor	GO:0008152//metabolic process	gi|955337351|ref|XP_014634773.1|;gi|955337353|ref|XP_014634774.1|/0;0/PREDICTED: putative succinate-semialdehyde dehydrogenase C1002.12c [NADP(+)] isoform X1 [Glycine max];PREDICTED: putative succinate-semialdehyde dehydrogenase C1002.12c [NADP(+)] isoform X2 [Glycine max]
Glyma.04G213400	-	-	-	-	-	-	-	-	-	-	-	-	-	-	-	-	1.33606	up	0.000479507	0.00562799	5026	ko00562//Inositol phosphate metabolism;ko04070//Phosphatidylinositol signaling system;ko01100//Metabolic pathways	-	GO:0052742	GO:0046488//phosphatidylinositol metabolic process;GO:0048017//inositol lipid-mediated signaling;GO:0046474//glycerophospholipid biosynthetic process	gi|955317369|ref|XP_014630360.1|;gi|947115746|gb|KRH64048.1|;gi|947115749|gb|KRH64051.1|;gi|571451616|ref|XP_006578790.1|/0;0;0;0/PREDICTED: phosphatidylinositol 4-kinase beta 1-like isoform X2 [Glycine max];hypothetical protein GLYMA_04G213400 [Glycine max];hypothetical protein GLYMA_04G213400 [Glycine max];PREDICTED: phosphatidylinositol 4-kinase beta 1-like isoform X1 [Glycine max]
Glyma.07G045600	-	-	-	-	-	-	-	-	-	-	-	-	-	-	-	-	1.21348	up	0.00185718	0.0147015	7013	ko00562//Inositol phosphate metabolism;ko04070//Phosphatidylinositol signaling system;ko04145//Phagosome	GO:0043231//intracellular membrane-bounded organelle	GO:0043169//cation binding;GO:0032550;GO:0016307//phosphatidylinositol phosphate kinase activity;GO:0016301//kinase activity	GO:0010118//stomatal movement;GO:0006996//organelle organization;GO:0046488//phosphatidylinositol metabolic process;GO:0048229//gametophyte development;GO:0019538//protein metabolic process	gi|571464853|ref|XP_006583187.1|;gi|947099221|gb|KRH47713.1|;gi|947099222|gb|KRH47714.1|/0;0;0/PREDICTED: 1-phosphatidylinositol-3-phosphate 5-kinase FAB1B-like [Glycine max];hypothetical protein GLYMA_07G045600 [Glycine max];hypothetical protein GLYMA_07G045600 [Glycine max]
Glyma.20G218600	-	-	-	-	-	-	-	-	-	-	-	-	-	-	-	-	1.00421	up	0.00435649	0.0269001	3874	ko00562//Inositol phosphate metabolism;ko04070//Phosphatidylinositol signaling system;ko01100//Metabolic pathways	-	-	GO:0046488//phosphatidylinositol metabolic process	gi|571569653|ref|XP_006606425.1|;gi|947042834|gb|KRG92558.1|/0;0/PREDICTED: type II inositol polyphosphate 5-phosphatase 15-like [Glycine max];hypothetical protein GLYMA_20G218600 [Glycine max]
Glyma.08G086800	-	-	-	-	-	-	-	-	-	-	-	-	-	-	-	-	-1.04624	down	0.00261448	0.0187781	1665	ko00562//Inositol phosphate metabolism;ko00920//Sulfur metabolism;ko04070//Phosphatidylinositol signaling system;ko01100//Metabolic pathways	-	GO:0008252//nucleotidase activity	GO:0046488//phosphatidylinositol metabolic process	gi|356524978|ref|XP_003531104.1|/0/PREDICTED: SAL1 phosphatase [Glycine max]
Glyma.02G076500	-	-	-	-	-	-	-	-	-	-	-	-	-	-	-	-	-1.08668	down	0.00110532	0.0101334	1436	ko00562//Inositol phosphate metabolism;ko01100//Metabolic pathways;ko01110//Biosynthesis of secondary metabolites	-	GO:0003824//catalytic activity	GO:0044710	gi|356499161|ref|XP_003518411.1|/0/PREDICTED: uncharacterized oxidoreductase At4g09670-like [Glycine max]
Glyma.08G127700	-	-	-	-	-	-	-	-	-	-	-	-	-	-	-	-	-1.25038	down	0.00174663	0.0140524	3280	ko00562//Inositol phosphate metabolism;ko04070//Phosphatidylinositol signaling system;ko01100//Metabolic pathways;ko04144//Endocytosis	GO:0016020//membrane	GO:0016307//phosphatidylinositol phosphate kinase activity;GO:0032550	GO:0046488//phosphatidylinositol metabolic process	gi|356525381|ref|XP_003531303.1|;gi|571471155|ref|XP_006585224.1|/0;0/PREDICTED: phosphatidylinositol 4-phosphate 5-kinase 7 isoform X1 [Glycine max];PREDICTED: phosphatidylinositol 4-phosphate 5-kinase 7 isoform X2 [Glycine max]
Glyma.14G072200	-	-	-	-	-	-	-	-	-	-	-	-	-	-	-	-	-1.27772	down	0.00055067	0.00626722	2575	ko00562//Inositol phosphate metabolism;ko04070//Phosphatidylinositol signaling system;ko01100//Metabolic pathways	-	GO:0032550;GO:0051765//inositol tetrakisphosphate kinase activity	GO:0072502;GO:0009620//response to fungus;GO:0009617//response to bacterium;GO:0002252;GO:0032958//inositol phosphate biosynthetic process	gi|351727917|ref|NP_001237433.1|/0/inositol pentakisphosphate 2-kinase [Glycine max]
Glyma.09G011100	-	-	-	-	-	-	-	-	-	-	-	-	-	-	-	-	-1.50689	down	0.00123266	0.0110036	1825	ko00562//Inositol phosphate metabolism;ko00053//Ascorbate and aldarate metabolism;ko04070//Phosphatidylinositol signaling system;ko01100//Metabolic pathways;ko01110//Biosynthesis of secondary metabolites	GO:0044444;GO:0016020//membrane	GO:0070456	GO:0019852//L-ascorbic acid metabolic process;GO:0046488//phosphatidylinositol metabolic process;GO:0009628//response to abiotic stimulus;GO:0006950//response to stress	gi|734420434|gb|KHN40821.1|;gi|947087895|gb|KRH36560.1|/0;4.89277e-157/Inositol monophosphatase 3 [Glycine soja] ;hypothetical protein GLYMA_09G011100 [Glycine max]
Glyma.11G238800	-2.59117	down	2.28167e-23	1.28249e-20	-3.01574	down	4.23775e-13	9.6487e-11	-2.78554	down	2.9301e-18	1.98889e-15	-2.88699	down	2.17484e-14	1.01683e-11	-3.45853	down	2.18572e-18	3.11694e-15	1945	ko00562//Inositol phosphate metabolism;ko01100//Metabolic pathways;ko01110//Biosynthesis of secondary metabolites	-	GO:0016872//intramolecular lyase activity	GO:0009642//response to light intensity;GO:0009620//response to fungus;GO:0000302//response to reactive oxygen species;GO:0006020//inositol metabolic process;GO:0009617//response to bacterium;GO:0006658//phosphatidylserine metabolic process;GO:0002252;GO:0007275//multicellular organismal development;GO:0003006//developmental process involved in reproduction;GO:0032958//inositol phosphate biosynth…	gi|14764466|gb|AAK72098.1|/0/myo-inositol-1-phosphate synthase [Glycine max]
Glyma.06G213600	-5.2584	down	1.22325e-103	1.03136e-99	-5.84886	down	1.29456e-43	8.3675e-40	-5.94808	down	1.70982e-44	8.7044e-41	-4.88634	down	1.05207e-14	5.2109e-12	-4.31699	down	6.58045e-13	3.91002e-10	5148	ko00562//Inositol phosphate metabolism;ko03008//Ribosome biogenesis in eukaryotes;ko04070//Phosphatidylinositol signaling system;ko01100//Metabolic pathways;ko04144//Endocytosis;ko04712//Circadian rhythm - plant	-	-	-	gi|947106465|gb|KRH54848.1|/1.00594e-90/hypothetical protein GLYMA_06G213600 [Glycine max]
