# Supplementary material for: Transcriptome analysis identifies differentially expressed genes involved in the metabolic regulatory network of progenies from the cross of low phytic acid GmMIPS1 and GmIPK1 soybean mutants
Source: Research Square preprint supplement (doi:10.21203/rs.3.rs-112462/v1), 2020-12-01
Supplement: Supplementary file 7 [file f59817119886d523d7567201.xlsx]

## Sheet: Sheet1
		Gene Number In Term
GO_ID	GOTerm	Stage 1	Stage 2	Stage 3	Stage 4	Stage 5
GO:0001738	morphogenesis of a polarized epithelium	-	-	-	-	3
GO:0002009	morphogenesis of an epithelium	-	-	-	-	3
GO:0015691	cadmium ion transport	-	-	-	-	3
GO:0046108	uridine metabolic process	-	-	-	-	3
GO:0048729	tissue morphogenesis	-	-	-	-	3
GO:1901658	glycosyl compound catabolic process	-	-	-	-	3
GO:0002239	response to oomycetes	-	-	-	-	4
GO:0009403	toxin biosynthetic process	-	-	2	-	4
GO:0009700	indole phytoalexin biosynthetic process	-	-	2	-	4
GO:0015977	carbon fixation	-	-	-	-	4
GO:0035434	copper ion transmembrane transport	-	-	-	-	4
GO:0042435	indole-containing compound biosynthetic process	-	-	2	-	4
GO:0042548	regulation of photosynthesis, light reaction	-	-	-	-	4
GO:0043467	regulation of generation of precursor metabolites and energy	-	-	-	-	4
GO:0045682	regulation of epidermis development	-	-	2	-	4
GO:0046217	indole phytoalexin metabolic process	-	-	2	-	4
GO:0052314	phytoalexin metabolic process	-	-	2	-	4
GO:0052315	phytoalexin biosynthetic process	-	-	2	-	4
GO:0006658	phosphatidylserine metabolic process	2	-	-	-	4
GO:0015985	energy coupled proton transport, down electrochemical gradient	5	5	5	-	4
GO:0015986	ATP synthesis coupled proton transport	5	5	5	-	4
GO:0006536	glutamate metabolic process	-	-	-	-	5
GO:0006829	zinc II ion transport	-	-	-	-	5
GO:0010109	regulation of photosynthesis	-	-	-	-	5
GO:0032958	inositol phosphate biosynthetic process	-	-	-	-	5
GO:0046173	polyol biosynthetic process	-	-	-	-	5
GO:0072350	tricarboxylic acid metabolic process	-	-	-	-	5
GO:0009250	glucan biosynthetic process	-	-	-	-	7
GO:0009608	response to symbiont	-	-	-	-	7
GO:0009627	systemic acquired resistance	-	-	-	-	7
GO:0072506	trivalent inorganic anion homeostasis	-	-	2	-	7
GO:0006241	CTP biosynthetic process	-	-	-	-	8
GO:0009926	auxin polar transport	-	-	2	-	8
GO:0046036	CTP metabolic process	-	-	-	-	8
GO:1990066	energy quenching	-	-	-	-	8
GO:0015850	organic hydroxy compound transport	4	-	-	-	8
GO:0001934	positive regulation of protein phosphorylation	-	-	-	-	9
GO:0010562	positive regulation of phosphorus metabolic process	-	-	-	-	9
GO:0042327	positive regulation of phosphorylation	-	-	-	-	9
GO:0045937	positive regulation of phosphate metabolic process	-	-	-	-	9
GO:0055081	anion homeostasis	-	-	3	-	9
GO:0006220	pyrimidine nucleotide metabolic process	-	-	-	-	10
GO:0006221	pyrimidine nucleotide biosynthetic process	-	-	-	-	10
GO:0009218	pyrimidine ribonucleotide metabolic process	-	-	-	-	10
GO:0009220	pyrimidine ribonucleotide biosynthetic process	-	-	-	-	10
GO:0046132	pyrimidine ribonucleoside biosynthetic process	-	-	-	-	10
GO:0046134	pyrimidine nucleoside biosynthetic process	-	-	-	-	10
GO:0072528	pyrimidine-containing compound biosynthetic process	-	-	-	-	10
GO:0006825	copper ion transport	-	-	-	-	11
GO:0009147	pyrimidine nucleoside triphosphate metabolic process	-	-	-	-	11
GO:0009148	pyrimidine nucleoside triphosphate biosynthetic process	-	-	-	-	11
GO:0009208	pyrimidine ribonucleoside triphosphate metabolic process	-	-	-	-	11
GO:0009209	pyrimidine ribonucleoside triphosphate biosynthetic process	-	-	-	-	11
GO:0009630	gravitropism	-	-	-	-	11
GO:0009814	defense response, incompatible interaction	-	-	-	-	11
GO:0031347	regulation of defense response	-	-	-	-	11
GO:0031401	positive regulation of protein modification process	-	-	-	-	11
GO:0032270	positive regulation of cellular protein metabolic process	-	-	-	-	11
GO:0051247	positive regulation of protein metabolic process	-	-	-	-	11
GO:0002252	immune effector process	-	-	-	-	12
GO:0006074	(1->3)-beta-D-glucan metabolic process	-	-	-	-	12
GO:0009629	response to gravity	-	-	-	-	12
GO:0015914	phospholipid transport	-	-	-	-	12
GO:0010466	negative regulation of peptidase activity	8	-	-	-	12
GO:0030162	regulation of proteolysis	8	-	-	-	12
GO:0045861	negative regulation of proteolysis	8	-	-	-	12
GO:0051346	negative regulation of hydrolase activity	8	-	-	-	12
GO:0052547	regulation of peptidase activity	8	-	-	-	12
GO:0006213	pyrimidine nucleoside metabolic process	-	-	-	-	13
GO:0009409	response to cold	-	-	-	-	13
GO:0010604	positive regulation of macromolecule metabolic process	-	-	-	-	13
GO:0031325	positive regulation of cellular metabolic process	-	-	-	-	13
GO:0046131	pyrimidine ribonucleoside metabolic process	-	-	-	-	13
GO:0048437	floral organ development	-	-	-	-	13
GO:0080134	regulation of response to stress	-	-	-	-	13
GO:0043086	negative regulation of catalytic activity	8	-	-	-	13
GO:0019220	regulation of phosphate metabolic process	-	-	-	-	14
GO:0043648	dicarboxylic acid metabolic process	-	-	-	-	14
GO:0051174	regulation of phosphorus metabolic process	-	-	-	-	14
GO:0051239	regulation of multicellular organismal process	-	-	4	-	14
GO:0031399	regulation of protein modification process	-	-	-	-	15
GO:0006869	lipid transport	-	-	-	-	16
GO:0009893	positive regulation of metabolic process	-	-	-	-	16
GO:0006972	hyperosmotic response	-	-	-	-	18
GO:0009167	purine ribonucleoside monophosphate metabolic process	9	10	10	-	18
GO:0009168	purine ribonucleoside monophosphate biosynthetic process	9	10	10	-	18
GO:0009411	response to UV	-	-	-	-	19
GO:0098655	cation transmembrane transport	8	9	9	-	19
GO:0098660	inorganic ion transmembrane transport	8	9	9	-	19
GO:0098662	inorganic cation transmembrane transport	8	9	9	-	19
GO:1901698	response to nitrogen compound	-	-	5	-	20
GO:0009126	purine nucleoside monophosphate metabolic process	9	10	10	-	21
GO:0009127	purine nucleoside monophosphate biosynthetic process	9	10	10	-	21
GO:0009812	flavonoid metabolic process	12	4	-	-	21
GO:0009266	response to temperature stimulus	-	-	-	-	22
GO:0010876	lipid localization	-	-	-	-	22
GO:0098771	inorganic ion homeostasis	-	-	5	-	22
GO:0006633	fatty acid biosynthetic process	9	-	-	-	22
GO:0009156	ribonucleoside monophosphate biosynthetic process	9	10	11	-	22
GO:0009161	ribonucleoside monophosphate metabolic process	9	10	11	-	22
GO:0072330	monocarboxylic acid biosynthetic process	9	-	-	-	23
GO:0009914	hormone transport	-	-	-	-	25
GO:0050801	ion homeostasis	-	-	7	-	25
GO:0051273	beta-glucan metabolic process	12	-	-	-	25
GO:0009064	glutamine family amino acid metabolic process	10	-	-	-	25
GO:0009123	nucleoside monophosphate metabolic process	10	10	11	-	25
GO:0009124	nucleoside monophosphate biosynthetic process	10	10	11	-	25
GO:0060918	auxin transport	-	3	-	-	25
GO:0000302	response to reactive oxygen species	13	-	6	-	27
GO:0006955	immune response	-	-	-	-	28
GO:0045087	innate immune response	-	-	-	-	28
GO:0000041	transition metal ion transport	-	-	-	-	29
GO:0003002	regionalization	-	-	-	-	29
GO:0007389	pattern specification process	-	-	-	-	29
GO:0032268	regulation of cellular protein metabolic process	-	-	-	-	29
GO:0051246	regulation of protein metabolic process	-	-	-	-	29
GO:0009141	nucleoside triphosphate metabolic process	11	11	12	-	29
GO:0009639	response to red or far red light	-	-	-	-	30
GO:0048878	chemical homeostasis	-	-	8	-	30
GO:0034728	nucleosome organization	-	-	-	-	31
GO:0071824	protein-DNA complex subunit organization	-	-	-	-	31
GO:0015992	proton transport	12	13	13	-	31
GO:0010817	regulation of hormone levels	-	-	-	-	33
GO:0009908	flower development	-	-	-	-	34
GO:0006164	purine nucleotide biosynthetic process	13	12	13	-	36
GO:0009152	purine ribonucleotide biosynthetic process	13	12	13	-	36
GO:0002376	immune system process	-	-	-	-	38
GO:0009620	response to fungus	-	-	10	-	38
GO:0006818	hydrogen transport	16	15	16	-	38
GO:0072522	purine-containing compound biosynthetic process	14	13	14	-	38
GO:0015711	organic anion transport	19	-	-	-	39
GO:0015672	monovalent inorganic cation transport	15	13	14	-	39
GO:1901657	glycosyl compound metabolic process	13	13	15	-	41
GO:0006073	cellular glucan metabolic process	16	-	-	-	42
GO:0044264	cellular polysaccharide metabolic process	17	-	-	-	43
GO:0080090	regulation of primary metabolic process	-	-	-	-	46
GO:0009260	ribonucleotide biosynthetic process	15	13	15	-	46
GO:0046390	ribose phosphate biosynthetic process	15	13	15	-	46
GO:0032446	protein modification by small protein conjugation	-	-	-	-	48
GO:0090567	reproductive shoot system development	-	-	-	-	48
GO:0009165	nucleotide biosynthetic process	-	13	15	-	51
GO:1901293	nucleoside phosphate biosynthetic process	-	13	15	-	51
GO:0006325	chromatin organization	-	-	-	-	52
GO:0044042	glucan metabolic process	24	-	-	-	52
GO:0031323	regulation of cellular metabolic process	-	-	-	-	53
GO:0006952	defense response	-	-	11	-	54
GO:0009617	response to bacterium	-	-	-	-	55
GO:0071822	protein complex subunit organization	-	-	-	-	58
GO:0048608	reproductive structure development	-	-	-	-	59
GO:0061458	reproductive system development	-	-	-	-	59
GO:0090407	organophosphate biosynthetic process	19	14	16	-	60
GO:0048367	shoot system development	-	-	-	-	62
GO:1901137	carbohydrate derivative biosynthetic process	-	13	17	-	62
GO:0044262	cellular carbohydrate metabolic process	-	-	-	-	67
GO:0044702	single organism reproductive process	-	-	-	-	67
GO:0005976	polysaccharide metabolic process	34	-	-	-	75
GO:0009416	response to light stimulus	-	-	-	-	82
GO:0009314	response to radiation	-	-	-	-	94
GO:0009791	post-embryonic development	-	-	-	-	94
GO:0006970	response to osmotic stress	-	-	-	-	100
GO:0065008	regulation of biological quality	-	-	17	-	105
GO:0006812	cation transport	-	15	21	-	105
GO:0009725	response to hormone	-	-	-	-	111
GO:0001101	response to acid chemical	-	-	-	-	112
GO:0003006	developmental process involved in reproduction	-	-	-	-	124
GO:0048731	system development	-	-	-	-	125
GO:0009719	response to endogenous stimulus	-	-	22	-	126
GO:0043207	response to external biotic stimulus	-	-	24	-	134
GO:0051707	response to other organism	-	-	24	-	134
GO:0009607	response to biotic stimulus	-	-	24	-	138
GO:0005975	carbohydrate metabolic process	-	-	-	-	140
GO:0044711	single-organism biosynthetic process	55	19	24	-	147
GO:0010033	response to organic substance	-	-	30	-	149
GO:0051704	multi-organism process	-	-	28	-	161
GO:0006811	ion transport	71	20	31	-	172
GO:0009605	response to external stimulus	-	-	30	-	178
GO:0007275	multicellular organismal development	-	-	-	-	204
GO:0044707	single-multicellular organism process	-	-	-	-	225
GO:0032501	multicellular organismal process	-	-	-	-	231
GO:0009628	response to abiotic stimulus	-	-	-	-	251
GO:0044765	single-organism transport	111	33	46	-	269
GO:1902578	single-organism localization	112	33	47	-	272
GO:0042221	response to chemical	-	-	59	-	334
GO:0006950	response to stress	-	-	64	-	406
GO:0010467	gene expression	-	-	-	-	651
GO:0050896	response to stimulus	-	-	114	-	795
GO:0043170	macromolecule metabolic process	-	-	-	-	1199
GO:0071704	organic substance metabolic process	-	-	-	-	1635
GO:0009967	positive regulation of signal transduction	-	-	2	-	-
GO:0010039	response to iron ion	-	-	3	-	-
GO:0010647	positive regulation of cell communication	-	-	2	-	-
GO:0018130	heterocycle biosynthetic process	-	-	50	-	-
GO:0018871	1-aminocyclopropane-1-carboxylate metabolic process	-	-	2	-	-
GO:0019438	aromatic compound biosynthetic process	-	-	51	-	-
GO:0023056	positive regulation of signaling	-	-	2	-	-
GO:0034654	nucleobase-containing compound biosynthetic process	-	-	48	-	-
GO:0080135	regulation of cellular response to stress	-	-	2	-	-
GO:0098542	defense response to other organism	-	-	6	-	-
GO:1901362	organic cyclic compound biosynthetic process	-	-	51	-	-
GO:1901700	response to oxygen-containing compound	-	-	14	-	-
GO:1990267	response to transition metal nanoparticle	-	-	3	-	-
GO:2000026	regulation of multicellular organismal development	-	-	4	-	-
GO:0044699	single-organism process	517	-	-	-	-
GO:0006820	anion transport	32	-	-	-	-
GO:0065009	regulation of molecular function	29	-	-	-	-
GO:0044092	negative regulation of molecular function	27	-	-	-	-
GO:0033554	cellular response to stress	24	-	-	-	-
GO:0071554	cell wall organization or biogenesis	24	-	-	-	-
GO:0019748	secondary metabolic process	20	-	-	-	-
GO:0009698	phenylpropanoid metabolic process	19	-	-	-	-
GO:0044550	secondary metabolite biosynthetic process	17	-	-	-	-
GO:0009699	phenylpropanoid biosynthetic process	16	-	-	-	-
GO:0015849	organic acid transport	15	-	-	-	-
GO:0046942	carboxylic acid transport	15	-	-	-	-
GO:0006979	response to oxidative stress	13	-	-	-	-
GO:0015698	inorganic anion transport	13	-	-	-	-
GO:0048523	negative regulation of cellular process	10	-	-	-	-
GO:0030243	cellulose metabolic process	9	-	-	-	-
GO:0031324	negative regulation of cellular metabolic process	8	-	-	-	-
GO:0032269	negative regulation of cellular protein metabolic process	8	-	-	-	-
GO:0051248	negative regulation of protein metabolic process	8	-	-	-	-
GO:0009414	response to water deprivation	7	-	-	-	-
GO:0009415	response to water	7	-	-	-	-
GO:0055065	metal ion homeostasis	7	-	-	-	-
GO:0008272	sulfate transport	6	-	3	-	-
GO:0009808	lignin metabolic process	6	-	-	-	-
GO:0055076	transition metal ion homeostasis	6	-	3	-	-
GO:0072348	sulfur compound transport	6	-	3	-	-
GO:0006875	cellular metal ion homeostasis	5	-	-	-	-
GO:0009813	flavonoid biosynthetic process	5	-	-	-	-
GO:0030003	cellular cation homeostasis	5	-	3	-	-
GO:0034599	cellular response to oxidative stress	5	-	-	-	-
GO:0034614	cellular response to reactive oxygen species	5	-	-	-	-
GO:0046916	cellular transition metal ion homeostasis	5	-	-	-	-
GO:0006558	L-phenylalanine metabolic process	4	-	-	-	-
GO:0009685	gibberellin metabolic process	4	-	-	-	-
GO:0070542	response to fatty acid	4	-	2	-	-
GO:1902221	erythrose 4-phosphate/phosphoenolpyruvate family amino acid metabolic process	4	-	-	-	-
GO:0000304	response to singlet oxygen	3	-	-	-	-
GO:0006476	protein deacetylation	3	-	-	-	-
GO:0016575	histone deacetylation	3	-	-	-	-
GO:0035601	protein deacylation	3	-	-	-	-
GO:0051552	flavone metabolic process	3	-	-	-	-
GO:0051553	flavone biosynthetic process	3	-	-	-	-
GO:0098732	macromolecule deacylation	3	-	-	-	-
GO:0006817	phosphate ion transport	2	-	-	-	-
GO:0007062	sister chromatid cohesion	2	-	-	-	-
GO:0010192	mucilage biosynthetic process	2	-	-	-	-
GO:0015750	pentose transport	2	-	-	-	-
GO:0071452	cellular response to singlet oxygen	2	-	-	-	-
GO:0044710	single-organism metabolic process	301	91	-	-	-
GO:0051179	localization	181	46	-	-	-
GO:0051234	establishment of localization	179	46	-	-	-
GO:0055086	nucleobase-containing small molecule metabolic process	-	20	-	-	-
GO:1901135	carbohydrate derivative metabolic process	-	20	-	-	-
GO:1901566	organonitrogen compound biosynthetic process	-	20	23	-	-
GO:0006753	nucleoside phosphate metabolic process	-	19	-	-	-
GO:0009117	nucleotide metabolic process	-	19	-	-	-
GO:0009259	ribonucleotide metabolic process	-	19	-	-	-
GO:0019693	ribose phosphate metabolic process	-	19	-	-	-
GO:0072521	purine-containing compound metabolic process	-	19	-	-	-
GO:0006163	purine nucleotide metabolic process	-	18	-	-	-
GO:0009150	purine ribonucleotide metabolic process	-	18	-	-	-
GO:0034220	ion transmembrane transport	-	10	10	-	-
GO:0055085	transmembrane transport	-	10	12	-	-
GO:1902600	hydrogen ion transmembrane transport	8	8	9	-	-
GO:0015980	energy derivation by oxidation of organic compounds	-	7	6	-	-
GO:0045333	cellular respiration	9	6	5	-	-
GO:0006461	protein complex assembly	-	5	-	-	-
GO:0015988	energy coupled proton transmembrane transport, against electrochemical gradient	-	5	6	-	-
GO:0022904	respiratory electron transport chain	-	5	3	-	-
GO:0070271	protein complex biogenesis	-	5	-	-	-
GO:0006835	dicarboxylic acid transport	-	3	-	-	-
GO:0015740	C4-dicarboxylate transport	-	3	-	-	-
GO:0006308	DNA catabolic process	-	2	-	-	-
GO:0009692	ethylene metabolic process	-	2	2	-	-
GO:0015936	coenzyme A metabolic process	-	2	2	-	-
GO:0015937	coenzyme A biosynthetic process	-	2	2	-	-
GO:0033865	nucleoside bisphosphate metabolic process	-	2	2	-	-
GO:0033866	nucleoside bisphosphate biosynthetic process	-	2	2	-	-
GO:0033875	ribonucleoside bisphosphate metabolic process	-	2	2	-	-
GO:0034030	ribonucleoside bisphosphate biosynthetic process	-	2	2	-	-
GO:0034032	purine nucleoside bisphosphate metabolic process	-	2	2	-	-
GO:0034033	purine nucleoside bisphosphate biosynthetic process	-	2	2	-	-
GO:0043449	cellular alkene metabolic process	-	2	2	-	-
GO:0051258	protein polymerization	-	2	2	-	-
GO:0051259	protein oligomerization	-	2	-	-	-
GO:1900673	olefin metabolic process	-	2	-	-	-
GO:0019752	carboxylic acid metabolic process	-	-	-	28	-
GO:0006508	proteolysis	68	-	-	27	-
GO:0006091	generation of precursor metabolites and energy	30	31	26	26	97
GO:0016485	protein processing	52	-	-	24	-
GO:0051604	protein maturation	52	-	-	24	-
GO:0010035	response to inorganic substance	40	-	18	19	123
GO:0010038	response to metal ion	-	-	-	17	108
GO:0055114	oxidation-reduction process	21	21	20	15	39
GO:0032787	monocarboxylic acid metabolic process	31	-	-	14	-
GO:0022900	electron transport chain	12	19	16	12	-
GO:0034660	ncRNA metabolic process	-	-	-	11	-
GO:0006631	fatty acid metabolic process	23	-	-	11	-
GO:0015979	photosynthesis	-	12	12	9	18
GO:0006399	tRNA metabolic process	-	-	-	9	-
GO:0019684	photosynthesis, light reaction	-	11	11	8	16
GO:0090305	nucleic acid phosphodiester bond hydrolysis	-	-	-	8	-
GO:0090501	RNA phosphodiester bond hydrolysis	8	-	-	8	-
GO:0031668	cellular response to extracellular stimulus	10	-	-	7	24
GO:0031669	cellular response to nutrient levels	10	-	-	7	24
GO:0071496	cellular response to external stimulus	10	-	-	7	24
GO:0009991	response to extracellular stimulus	-	-	-	7	25
GO:0031667	response to nutrient levels	-	-	-	7	25
GO:0034470	ncRNA processing	-	-	-	7	-
GO:0009267	cellular response to starvation	10	-	-	6	20
GO:0042594	response to starvation	10	-	-	6	20
GO:0008033	tRNA processing	-	-	-	6	-
GO:0048507	meristem development	-	-	-	6	-
GO:0009163	nucleoside biosynthetic process	12	13	14	5	28
GO:0042455	ribonucleoside biosynthetic process	12	13	14	5	28
GO:0009116	nucleoside metabolic process	12	13	14	5	32
GO:0009119	ribonucleoside metabolic process	12	13	14	5	32
GO:1901659	glycosyl compound biosynthetic process	13	13	15	5	34
GO:0015893	drug transport	10	-	-	5	-
GO:0042493	response to drug	10	-	-	5	-
GO:0009767	photosynthetic electron transport chain	-	7	6	5	-
GO:0019751	polyol metabolic process	-	3	-	4	14
GO:0010243	response to organonitrogen compound	-	-	5	4	15
GO:0042451	purine nucleoside biosynthetic process	10	12	12	4	18
GO:0046129	purine ribonucleoside biosynthetic process	10	12	12	4	18
GO:0046128	purine ribonucleoside metabolic process	10	12	12	4	19
GO:0042278	purine nucleoside metabolic process	10	12	12	4	20
GO:0009142	nucleoside triphosphate biosynthetic process	11	11	12	4	28
GO:0009199	ribonucleoside triphosphate metabolic process	11	11	12	4	28
GO:0009201	ribonucleoside triphosphate biosynthetic process	11	11	12	4	28
GO:0006457	protein folding	-	-	-	4	-
GO:0006754	ATP biosynthetic process	9	10	10	3	17
GO:0009144	purine nucleoside triphosphate metabolic process	9	10	10	3	17
GO:0009145	purine nucleoside triphosphate biosynthetic process	9	10	10	3	17
GO:0009205	purine ribonucleoside triphosphate metabolic process	9	10	10	3	17
GO:0009206	purine ribonucleoside triphosphate biosynthetic process	9	10	10	3	17
GO:0046034	ATP metabolic process	9	10	10	3	17
GO:0010051	xylem and phloem pattern formation	-	-	-	3	-
GO:0043647	inositol phosphate metabolic process	5	-	-	3	-
GO:0009404	toxin metabolic process	-	-	2	2	5
GO:0006570	tyrosine metabolic process	-	-	-	2	-
GO:0009637	response to blue light	-	-	-	2	-
GO:0006020	inositol metabolic process	-	2	2	2	-
