# Supplementary material for: Transcriptome analysis identifies differentially expressed genes involved in the metabolic regulatory network of progenies from the cross of low phytic acid GmMIPS1 and GmIPK1 soybean mutants
Source: Research Square preprint supplement (doi:10.21203/rs.3.rs-112462/v1), 2020-12-01
Supplement: Supplementary file 8 [file 1ae641b661f4b8da4ef11fe8.xlsx]

## Sheet: Sheet1
	Gene Number In Pathway
#Pathway	Pathway ID	Stage 1 DEGs number	Stage 2	Stage 3	Stage 4	Stage 5
Glycolysis / Gluconeogenesis	ko00010	18	3	3	9	39
Citrate cycle (TCA cycle)	ko00020	1			1	12
Pentose phosphate pathway	ko00030	6	2	3	2	19
Pentose and glucuronate interconversions	ko00040	15	3	2	6	31
Fructose and mannose metabolism	ko00051	4		1	2	17
Galactose metabolism	ko00052	15		1	3	26
Ascorbate and aldarate metabolism	ko00053	11	3	5	7	26
Fatty acid biosynthesis	ko00061	10	2	1		11
Fatty acid elongation	ko00062	4	1	3	3	6
Fatty acid metabolism	ko00071	9	3	3	5	19
Synthesis and degradation of ketone bodies	ko00072	1	1	1	1	2
Cutin, suberine and wax biosynthesis	ko00073	17	2	1	4	16
Steroid biosynthesis	ko00100	2			1	11
Ubiquinone and other terpenoid-quinone biosynthesis	ko00130	12		1		19
Oxidative phosphorylation	ko00190	25	30	29	7	67
Photosynthesis	ko00195	24	33	32	28	69
Photosynthesis - antenna proteins	ko00196	1			5	22
Purine metabolism	ko00230	37	11	19	12	104
Caffeine metabolism	ko00232					1
Pyrimidine metabolism	ko00240	39	9	19	12	100
Alanine, aspartate and glutamate metabolism	ko00250	6	2	3	6	31
Glycine, serine and threonine metabolism	ko00260	16	1	8	2	18
Cysteine and methionine metabolism	ko00270	11	3	9	7	24
Valine, leucine and isoleucine degradation	ko00280	4	2	2	2	15
Valine, leucine and isoleucine biosynthesis	ko00290	8		6		10
Lysine biosynthesis	ko00300					2
Lysine degradation	ko00310	6	3	2	3	21
Arginine and proline metabolism	ko00330	13	2	1	6	27
Histidine metabolism	ko00340	3	1		1	5
Tyrosine metabolism	ko00350	6	2	2	5	15
Phenylalanine metabolism	ko00360	22	2	4	5	39
Tryptophan metabolism	ko00380	10	2	3	5	12
Phenylalanine, tyrosine and tryptophan biosynthesis	ko00400	5	1		4	8
Benzoxazinoid biosynthesis	ko00402	6	2	3		5
beta-Alanine metabolism	ko00410	5	2		1	16
Taurine and hypotaurine metabolism	ko00430	7		1	2	7
Selenocompound metabolism	ko00450	2	3	2	3	7
Cyanoamino acid metabolism	ko00460	9	2	6	5	21
Glutathione metabolism	ko00480	11	4	5	1	25
Starch and sucrose metabolism	ko00500	30	5	14	14	75
N-Glycan biosynthesis	ko00510	3		2	1	9
Other glycan degradation	ko00511	21	1	2	3	21
Other types of O-glycan biosynthesis	ko00514				1	2
Amino sugar and nucleotide sugar metabolism	ko00520	9	1	6	3	38
Glycosaminoglycan degradation	ko00531	3				11
Glycerolipid metabolism	ko00561	10	1	2	1	16
Inositol phosphate metabolism	ko00562	8	4	5	5	31
Glycosylphosphatidylinositol(GPI)-anchor biosynthesis	ko00563	12		5	3	29
Glycerophospholipid metabolism	ko00564	7		2		23
Ether lipid metabolism	ko00565	1				5
Arachidonic acid metabolism	ko00590	3		1		2
Linoleic acid metabolism	ko00591	9		2	2	16
alpha-Linolenic acid metabolism	ko00592	8		3	5	23
Sphingolipid metabolism	ko00600	6				15
Glycosphingolipid biosynthesis - globo series	ko00603	3				2
Glycosphingolipid biosynthesis - ganglio series	ko00604	3				7
Pyruvate metabolism	ko00620	17	5	4	6	36
Glyoxylate and dicarboxylate metabolism	ko00630	9	1	2	1	17
Propanoate metabolism	ko00640	14	4	2	3	23
Butanoate metabolism	ko00650	3	1	1	1	12
C5-Branched dibasic acid metabolism	ko00660					2
One carbon pool by folate	ko00670	2		1		5
Carbon fixation in photosynthetic organisms	ko00710	9	2	1	4	31
Thiamine metabolism	ko00730	1			1	2
Riboflavin metabolism	ko00740	2				8
Vitamin B6 metabolism	ko00750	3	2	1	2	9
Nicotinate and nicotinamide metabolism	ko00760					2
Pantothenate and CoA biosynthesis	ko00770	1		1	1	5
Biotin metabolism	ko00780					1
Lipoic acid metabolism	ko00785	1			1	2
Folate biosynthesis	ko00790	1				4
Porphyrin and chlorophyll metabolism	ko00860	7		3	1	19
Terpenoid backbone biosynthesis	ko00900	4	2	2	2	12
Indole alkaloid biosynthesis	ko00901	4		2		1
Monoterpenoid biosynthesis	ko00902					3
Limonene and pinene degradation	ko00903	19	3	4	8	29
Diterpenoid biosynthesis	ko00904	12	3	3	5	21
Brassinosteroid biosynthesis	ko00905	2		1		4
Carotenoid biosynthesis	ko00906	24		5	5	16
Zeatin biosynthesis	ko00908	6	3	5	4	13
Sesquiterpenoid and triterpenoid biosynthesis	ko00909	4	2	1		2
Nitrogen metabolism	ko00910	7	3	4	4	25
Sulfur metabolism	ko00920	2	2	2	1	9
Phenylpropanoid biosynthesis	ko00940	42	9	14	14	74
Flavonoid biosynthesis	ko00941	45	18	14	12	67
Anthocyanin biosynthesis	ko00942	2				1
Isoflavonoid biosynthesis	ko00943	9		3	2	8
Flavone and flavonol biosynthesis	ko00944	22	7	9	7	26
Stilbenoid, diarylheptanoid and gingerol biosynthesis	ko00945	28	6	10	9	43
Isoquinoline alkaloid biosynthesis	ko00950	3	1		2	9
Tropane, piperidine and pyridine alkaloid biosynthesis	ko00960	4	1		2	10
Betalain biosynthesis	ko00965					1
Glucosinolate biosynthesis	ko00966	5		2	1	4
Aminoacyl-tRNA biosynthesis	ko00970	3	1	1	2	10
Biosynthesis of unsaturated fatty acids	ko01040	6	1	1	2	12
Metabolic pathways	ko01100	361	108	153	138	794
Biosynthesis of secondary metabolites	ko01110	210	42	66	65	374
ABC transporters	ko02010	21	1	0	3	46
Ribosome biogenesis in eukaryotes	ko03008	14	2	3	15	45
Ribosome	ko03010	27	18	22	15	252
RNA transport	ko03013	26	2	9	16	61
mRNA surveillance pathway	ko03015	10	2	2	4	28
RNA degradation	ko03018	12	4	6	7	31
RNA polymerase	ko03020	28	6	15	6	58
Basal transcription factors	ko03022	2	2			4
DNA replication	ko03030	3	1	2	3	20
Spliceosome	ko03040	17	1	5	11	66
Proteasome	ko03050	1			1	6
Protein export	ko03060	6	1	3	3	30
Base excision repair	ko03410	7			2	16
Nucleotide excision repair	ko03420	3	1	1	2	20
Mismatch repair	ko03430	3	1	3	1	12
Homologous recombination	ko03440	9	3	6	1	22
Non-homologous end-joining	ko03450					2
Phosphatidylinositol signaling system	ko04070	7	2	5	3	37
Plant hormone signal transduction	ko04075	67	12	27	38	252
Ubiquitin mediated proteolysis	ko04120	13	1	8	9	64
Sulfur relay system	ko04122					1
SNARE interactions in vesicular transport	ko04130	2		1		22
Regulation of autophagy	ko04140	5		2		29
Protein processing in endoplasmic reticulum	ko04141	24	2	14	5	113
Endocytosis	ko04144	4	1	3	3	27
Phagosome	ko04145	12	2	3	1	47
Peroxisome	ko04146	12	1			33
Plant-pathogen interaction	ko04626	109	26	54	39	303
Natural killer cell mediated cytotoxicity	ko04650			2		7
Circadian rhythm - mammal	ko04710	2	1	1		9
Circadian rhythm - plant	ko04712	12	4	6	7	36
