# Supplementary material for: Transcriptome analysis identifies differentially expressed genes involved in the metabolic regulatory network of progenies from the cross of low phytic acid GmMIPS1 and GmIPK1 soybean mutants
Source: Research Square preprint supplement (doi:10.21203/rs.3.rs-112462/v1), 2020-12-01
Supplement: Supplementary file 9 [file 3539f4d1473543bd6c7f2bde.xlsx]

## Sheet: Sheet1
GeneID	log2Ratio(2mlpa-1/2MWT-1)	Up-Down-Regulation(2mlpa-1/2MWT-1)	P-value	FDR	log2Ratio(2mlpa-2/2MWT-2)	Up-Down-Regulation(2mlpa-2/2MWT-2)	P-value	FDR	log2Ratio(2mlpa-3/2MWT-3)	Up-Down-Regulation(2mlpa-3/2MWT-3)	P-value	FDR	log2Ratio(2mlpa-4/2MWT-4)	Up-Down-Regulation(2mlpa-4/2MWT-4)	P-value	FDR	log2Ratio(2mlpa-5/2MWT-5)	Up-Down-Regulation(2mlpa-5/2MWT-5)			Length	Pathway	GO Component	GO Function	GO Process	Blast nr
Glyma.U035700	2.43731	up	7.72933e-15	1.44066e-12	1.31096	up	0.000148993	0.0120079	1.15885	up	0.000259344	0.0134722	-	-	-	-	2.00447	up	0.000316351	0.00427295	3324	ko04626//Plant-pathogen interaction	-	GO:0016462//pyrophosphatase activity;GO:0032550;GO:0036094//small molecule binding;GO:1901363;GO:0097159//organic cyclic compound binding	GO:0006950//response to stress;GO:0007154//cell communication	gi|947038010|gb|KRG88494.1|;gi|947038009|gb|KRG88493.1|;gi|947038006|gb|KRG88490.1|;gi|955395634|ref|XP_014628764.1|;gi|947038007|gb|KRG88491.1|;gi|947038002|gb|KRG88486.1|;gi|947038005|gb|KRG88489.1|;gi|947038004|gb|KRG88488.1|;gi|947038003|gb|KRG88487.1|/0;0;0;0;0;0;0;0;0/hypothetical protein GLYMA_U035700, partial [Glycine max];hypothetical protein GLYMA_U035700, partial [Glycine max];hypothet…
Glyma.20G061300	-	-	-	-	-	-	-	-	-	-	-	-	-	-	-	-	2.77513	up	0.00673673	0.0362936	3489	ko04626//Plant-pathogen interaction	-	GO:0032550	GO:0006950//response to stress;GO:0007154//cell communication	gi|947040285|gb|KRG90009.1|;gi|947040287|gb|KRG90011.1|;gi|947040286|gb|KRG90010.1|/0;0;0/hypothetical protein GLYMA_20G061300 [Glycine max];hypothetical protein GLYMA_20G061300 [Glycine max];hypothetical protein GLYMA_20G061300 [Glycine max]
Glyma.20G050700	-1.32437	down	6.58e-05	0.00141392	-	-	-	-	-	-	-	-	-	-	-	-	-	-	-	-	4266	ko00230//Purine metabolism;ko00240//Pyrimidine metabolism;ko01100//Metabolic pathways;ko03020//RNA polymerase;ko04626//Plant-pathogen interaction	-	GO:0032550	GO:0006950//response to stress	gi|947040118|gb|KRG89842.1|;gi|356577440|ref|XP_003556833.1|/0;0/hypothetical protein GLYMA_20G050700 [Glycine max];PREDICTED: putative disease resistance RPP13-like protein 1 isoform X1 [Glycine max]
Glyma.18G086900	-2.30704	down	0.000137209	0.00255514	-	-	-	-	-3.64058	down	9.14894e-07	9.07319e-05	-	-	-	-	-	-	-	-	3010	ko04626//Plant-pathogen interaction	-	GO:0032550	GO:0006950//response to stress	gi|947049112|gb|KRG98640.1|/0/hypothetical protein GLYMA_18G086900 [Glycine max]
Glyma.18G086600	-	-	-	-	-	-	-	-	-	-	-	-	-	-	-	-	3.16077	up	5.28e-05	0.00117216	3221	ko04626//Plant-pathogen interaction	-	GO:0032550	GO:0006950//response to stress	gi|955384422|ref|XP_014626398.1|/0/PREDICTED: disease resistance protein RPM1-like [Glycine max]
Glyma.17G245500	-	-	-	-	-	-	-	-	-	-	-	-	-	-	-	-	2.83107	up	0.00241885	0.0177347	2929	ko00230//Purine metabolism;ko00240//Pyrimidine metabolism;ko01100//Metabolic pathways;ko03020//RNA polymerase;ko04626//Plant-pathogen interaction	-	GO:0032550	GO:0009617//response to bacterium;GO:0009628//response to abiotic stimulus;GO:0006950//response to stress	gi|356564213|ref|XP_003550350.1|/0/PREDICTED: probable disease resistance protein At4g33300 [Glycine max]
Glyma.17G180100	-	-	-	-	-	-	-	-	-2.49848	down	0.000280985	0.0142807	-	-	-	-	1.83128	up	0.000586072	0.00656792	3836	ko00230//Purine metabolism;ko00240//Pyrimidine metabolism;ko01100//Metabolic pathways;ko03020//RNA polymerase;ko04626//Plant-pathogen interaction	-	GO:0032550	GO:0006950//response to stress	gi|571537529|ref|XP_006601011.1|/0/PREDICTED: probable disease resistance protein At5g66900 [Glycine max]
Glyma.16G214900	4.65642	up	9.35532e-30	9.01452e-27	3.54707	up	1.77741e-10	3.22709e-08	3.92223	up	3.42945e-16	1.66274e-13	3.89277	up	1.62578e-15	9.47352e-13	3.15223	up	2.28974e-05	0.000646591	2927	ko04626//Plant-pathogen interaction	-	GO:0032550;GO:0016462//pyrophosphatase activity	GO:0050896//response to stimulus;GO:0006950//response to stress;GO:0007154//cell communication	gi|947060016|gb|KRH09422.1|;gi|571530234|ref|XP_006599700.1|;gi|947060020|gb|KRH09426.1|/0;0;0/hypothetical protein GLYMA_16G214900 [Glycine max];PREDICTED: TMV resistance protein N-like isoform X4 [Glycine max];hypothetical protein GLYMA_16G214900 [Glycine max]
Glyma.16G214800	-	-	-	-	-	-	-	-	-	-	-	-	-	-	-	-	2.03844	up	0.00432042	0.0267468	1197	ko04626//Plant-pathogen interaction	-	GO:0046872//metal ion binding;GO:0016462//pyrophosphatase activity;GO:0032550	GO:0006950//response to stress;GO:0007154//cell communication	gi|947060014|gb|KRH09420.1|/0/hypothetical protein GLYMA_16G214800 [Glycine max]
Glyma.16G213700	-	-	-	-	-	-	-	-	-	-	-	-	-	-	-	-	4.79466	up	3.84883e-08	4.92254e-06	3445	ko04626//Plant-pathogen interaction	-	GO:0032550	GO:0006950//response to stress;GO:0007154//cell communication;GO:0050896//response to stimulus	gi|571530198|ref|XP_006599690.1|;gi|571530196|ref|XP_006599689.1|;gi|955374931|ref|XP_014624138.1|/0;0;0/PREDICTED: TMV resistance protein N-like isoform X2 [Glycine max];PREDICTED: TMV resistance protein N-like isoform X1 [Glycine max];PREDICTED: TMV resistance protein N-like isoform X3 [Glycine max]
Glyma.16G210800	-	-	-	-	-	-	-	-	-	-	-	-	-	-	-	-	3.60977	up	0.000244135	0.00353451	4638	ko00230//Purine metabolism;ko00240//Pyrimidine metabolism;ko01100//Metabolic pathways;ko03020//RNA polymerase;ko04626//Plant-pathogen interaction	-	GO:0032550;GO:0036094//small molecule binding;GO:1901363;GO:0097159//organic cyclic compound binding;GO:0016462//pyrophosphatase activity	GO:0050896//response to stimulus;GO:0006950//response to stress;GO:0007154//cell communication	gi|947059932|gb|KRH09338.1|;gi|947059931|gb|KRH09337.1|;gi|351724311|ref|NP_001237821.1|/0;0;0/hypothetical protein GLYMA_16G210800 [Glycine max];hypothetical protein GLYMA_16G210800 [Glycine max];candidate disease-resistance protein [Glycine max]
Glyma.16G210600	-	-	-	-	-	-	-	-	-	-	-	-	-	-	-	-	3.33939	up	0.00524479	0.0305341	4549	ko00230//Purine metabolism;ko00240//Pyrimidine metabolism;ko01100//Metabolic pathways;ko03020//RNA polymerase;ko04626//Plant-pathogen interaction	-	GO:0032550;GO:0016462//pyrophosphatase activity	GO:0050896//response to stimulus;GO:0006950//response to stress;GO:0007154//cell communication	gi|356559997|ref|XP_003548282.1|;gi|947059928|gb|KRH09334.1|;gi|947059927|gb|KRH09333.1|/0;0;0/PREDICTED: TMV resistance protein N [Glycine max];hypothetical protein GLYMA_16G210600 [Glycine max];hypothetical protein GLYMA_16G210600 [Glycine max]
Glyma.16G087100	-	-	-	-	-	-	-	-	-	-	-	-	-	-	-	-	2.42611	up	0.00242063	0.0177383	3617	ko00230//Purine metabolism;ko00240//Pyrimidine metabolism;ko01100//Metabolic pathways;ko03020//RNA polymerase;ko04626//Plant-pathogen interaction	-	GO:0032550	GO:0006950//response to stress;GO:0007154//cell communication;GO:0050896//response to stimulus	gi|571526878|ref|XP_006599163.1|;gi|947058007|gb|KRH07413.1|/0;0/PREDICTED: TMV resistance protein N-like [Glycine max];hypothetical protein GLYMA_16G087100 [Glycine max]
Glyma.16G086700	-	-	-	-	-	-	-	-	-	-	-	-	-	-	-	-	3.72714	up	0.000349053	0.00456249	3682	ko00230//Purine metabolism;ko00240//Pyrimidine metabolism;ko01100//Metabolic pathways;ko03020//RNA polymerase;ko04626//Plant-pathogen interaction	-	GO:0032550	GO:0006950//response to stress;GO:0007154//cell communication	gi|571526864|ref|XP_006599159.1|/0/PREDICTED: TMV resistance protein N-like [Glycine max]
Glyma.16G033900	-	-	-	-	-	-	-	-	-	-	-	-	-	-	-	-	1.22042	up	0.00321455	0.0218365	3868	ko00230//Purine metabolism;ko00240//Pyrimidine metabolism;ko01100//Metabolic pathways;ko03020//RNA polymerase;ko04626//Plant-pathogen interaction	-	GO:0032550	GO:0006950//response to stress;GO:0007154//cell communication	gi|571525333|ref|XP_006598947.1|;gi|947057200|gb|KRH06606.1|;gi|571525345|ref|XP_006598950.1|/0;0;0/PREDICTED: TMV resistance protein N-like isoform X1 [Glycine max];hypothetical protein GLYMA_16G033900 [Glycine max];PREDICTED: TMV resistance protein N-like isoform X2 [Glycine max]
Glyma.16G006400	-	-	-	-	-	-	-	-	-	-	-	-	-	-	-	-	4.05615	up	8.1037e-05	0.00160933	3809	ko00230//Purine metabolism;ko00240//Pyrimidine metabolism;ko01100//Metabolic pathways;ko03020//RNA polymerase;ko04626//Plant-pathogen interaction	-	GO:0032550	GO:0006950//response to stress;GO:0007154//cell communication	gi|571524432|ref|XP_006598818.1|;gi|947056747|gb|KRH06153.1|/0;0/PREDICTED: putative disease resistance protein At4g11170 [Glycine max];hypothetical protein GLYMA_16G006400 [Glycine max]
Glyma.15G230700	-	-	-	-	-	-	-	-	-	-	-	-	-	-	-	-	2.59016	up	0.000684867	0.00729119	4001	ko00230//Purine metabolism;ko00240//Pyrimidine metabolism;ko01100//Metabolic pathways;ko03020//RNA polymerase;ko04626//Plant-pathogen interaction	-	GO:0032550	GO:0006950//response to stress	gi|571520977|ref|XP_006598091.1|;gi|947064056|gb|KRH13317.1|/0;0/PREDICTED: putative disease resistance protein At3g14460 isoform X1 [Glycine max];hypothetical protein GLYMA_15G230700 [Glycine max]
Glyma.15G168500	-	-	-	-	-	-	-	-	-	-	-	-	-	-	-	-	3.41448	up	8.30121e-05	0.00163985	3138	ko04626//Plant-pathogen interaction	-	GO:0016462//pyrophosphatase activity;GO:0032550	GO:0006950//response to stress;GO:0008152//metabolic process	gi|571513784|ref|XP_006596935.1|;gi|351727306|ref|NP_001237924.1|/0;0/PREDICTED: CC-NBS-LRR class disease resistance protein isoform X1 [Glycine max];CC-NBS-LRR class disease resistance protein [Glycine max]
Glyma.15G127100	-1.82835	down	3.99e-05	0.000945308	-	-	-	-	-	-	-	-	-	-	-	-	-	-	-	-	3857	ko00230//Purine metabolism;ko00240//Pyrimidine metabolism;ko01100//Metabolic pathways;ko03020//RNA polymerase;ko04626//Plant-pathogen interaction	-	GO:0032550	GO:0006950//response to stress	gi|571522550|ref|XP_006598349.1|/0/PREDICTED: putative disease resistance protein RGA3 [Glycine max]
Glyma.14G079600	-	-	-	-	-	-	-	-	-	-	-	-	-	-	-	-	1.61914	up	0.00121891	0.0109151	2732	ko00230//Purine metabolism;ko00240//Pyrimidine metabolism;ko01100//Metabolic pathways;ko03020//RNA polymerase;ko04626//Plant-pathogen interaction	-	GO:0032550	GO:0009617//response to bacterium;GO:0009628//response to abiotic stimulus;GO:0006950//response to stress	gi|356552172|ref|XP_003544443.1|/0/PREDICTED: probable disease resistance protein At4g33300 [Glycine max]
Glyma.14G079500	-	-	-	-	-	-	-	-	-	-	-	-	-	-	-	-	3.46527	up	0.000457172	0.00545109	3226	ko00230//Purine metabolism;ko00240//Pyrimidine metabolism;ko01100//Metabolic pathways;ko03020//RNA polymerase;ko04626//Plant-pathogen interaction	-	GO:0032550	GO:0009617//response to bacterium;GO:0009628//response to abiotic stimulus;GO:0006950//response to stress	gi|947066147|gb|KRH15290.1|;gi|571508169|ref|XP_003544442.2|/0;0/hypothetical protein GLYMA_14G079500 [Glycine max];PREDICTED: probable disease resistance protein At4g33300 [Glycine max]
Glyma.13G285500	-	-	-	-	-	-	-	-	-	-	-	-	-	-	-	-	2.08844	up	0.000176805	0.00283455	2506	ko04626//Plant-pathogen interaction	GO:0016020//membrane	GO:0032550;GO:0005515//protein binding;GO:0004702//receptor signaling protein serine/threonine kinase activity	GO:0035556//intracellular signal transduction;GO:0032147//activation of protein kinase activity;GO:0006950//response to stress	gi|356549811|ref|XP_003543284.1|/0/PREDICTED: probable leucine-rich repeat receptor-like serine/threonine-protein kinase At5g15730 [Glycine max]
Glyma.13G193300	-	-	-	-	-	-	-	-	-	-	-	-	-	-	-	-	2.68408	up	0.00201638	0.0155725	2962	ko00230//Purine metabolism;ko00240//Pyrimidine metabolism;ko01100//Metabolic pathways;ko03020//RNA polymerase;ko04626//Plant-pathogen interaction	-	GO:0032550	GO:0006950//response to stress	gi|947071784|gb|KRH20675.1|/0/hypothetical protein GLYMA_13G193300 [Glycine max]
Glyma.13G190800	-2.64195	down	0.0003291	0.0052402	-	-	-	-	-	-	-	-	-	-	-	-	-	-	-	-	6542	ko00230//Purine metabolism;ko00240//Pyrimidine metabolism;ko01100//Metabolic pathways;ko03020//RNA polymerase;ko04626//Plant-pathogen interaction	-	GO:0032550	GO:0006950//response to stress	gi|351724721|ref|NP_001237835.1|/0/disease resistance protein [Glycine max]
Glyma.13G071900	-1.78037	down	2.9e-06	0.000103564	-	-	-	-	-	-	-	-	-	-	-	-	-	-	-	-	4266	ko00230//Purine metabolism;ko00240//Pyrimidine metabolism;ko01100//Metabolic pathways;ko03020//RNA polymerase;ko04626//Plant-pathogen interaction	-	GO:0032550	GO:0006950//response to stress	gi|356550917|ref|XP_003543829.1|/0/PREDICTED: putative disease resistance RPP13-like protein 1 [Glycine max]
Glyma.12G216000	-	-	-	-	-	-	-	-	-	-	-	-	-	-	-	-	2.00009	up	0.00115279	0.0104709	1938	ko04626//Plant-pathogen interaction	GO:0016020//membrane	GO:0032550;GO:0005515//protein binding;GO:0004702//receptor signaling protein serine/threonine kinase activity	GO:0035556//intracellular signal transduction;GO:0032147//activation of protein kinase activity;GO:0006950//response to stress	gi|359806757|ref|NP_001241300.1|/0/probable leucine-rich repeat receptor-like serine/threonine-protein kinase At5g15730-like [Glycine max]
Glyma.11G072100	-	-	-	-	-	-	-	-	-	-	-	-	-	-	-	-	1.64713	up	0.00409402	0.0257476	4775	ko04626//Plant-pathogen interaction	-	GO:0032550	GO:0006950//response to stress	gi|734423019|gb|KHN41940.1|/0/Disease resistance RPP8-like protein 3 [Glycine soja]
Glyma.10G152200	-	-	-	-	-	-	-	-	-	-	-	-	-	-	-	-	3.00807	up	0.00745841	0.0390552	3529	ko04626//Plant-pathogen interaction	GO:0031224//intrinsic component of membrane	GO:0046872//metal ion binding;GO:0016209//antioxidant activity;GO:0050664//oxidoreductase activity, acting on NAD(P)H, oxygen as acceptor	GO:0044707;GO:0006950//response to stress;GO:0044710	gi|947085173|gb|KRH33894.1|/0/hypothetical protein GLYMA_10G152200 [Glycine max]
Glyma.09G258200	-	-	-	-	-2.35685	down	0.000468413	0.0314723	-	-	-	-	-	-	-	-	-	-	-	-	2703	ko04626//Plant-pathogen interaction	-	GO:0032550	GO:0006950//response to stress	gi|947091771|gb|KRH40436.1|/0/hypothetical protein GLYMA_09G258200 [Glycine max]
Glyma.09G210600	-	-	-	-	-	-	-	-	-	-	-	-	-	-	-	-	2.82882	up	0.00114987	0.0104544	3243	ko04626//Plant-pathogen interaction	-	GO:0032550	GO:0006950//response to stress	gi|947090963|gb|KRH39628.1|;gi|356531473|ref|XP_003534302.1|/0;0/hypothetical protein GLYMA_09G210600 [Glycine max];PREDICTED: disease resistance protein RPM1-like [Glycine max]
Glyma.09G204500	-	-	-	-	-	-	-	-	-	-	-	-	-	-	-	-	1.86353	up	0.000764922	0.00787658	2748	ko04075//Plant hormone signal transduction;ko04626//Plant-pathogen interaction	-	GO:0005515//protein binding	GO:0080090//regulation of primary metabolic process;GO:1901576;GO:1901700;GO:0009889//regulation of biosynthetic process;GO:0006950//response to stress	gi|571478541|ref|XP_003534274.2|/0/PREDICTED: transcription factor MYC2-like [Glycine max]
Glyma.08G301200	-	-	-	-	-	-	-	-	-	-	-	-	-	-	-	-	2.4358	up	0.00107318	0.00993452	4462	ko00230//Purine metabolism;ko00240//Pyrimidine metabolism;ko01100//Metabolic pathways;ko03020//RNA polymerase;ko04626//Plant-pathogen interaction	-	GO:0032550	GO:0006950//response to stress;GO:0007154//cell communication	gi|571473774|ref|XP_006586027.1|/0/PREDICTED: TMV resistance protein N-like isoform X1 [Glycine max]
Glyma.07G077700	-	-	-	-	-	-	-	-	-	-	-	-	-	-	-	-	4.26459	up	7.67e-05	0.00154949	8284	ko04626//Plant-pathogen interaction	-	GO:0032550;GO:0016462//pyrophosphatase activity	GO:0006950//response to stress	gi|571465371|ref|XP_006583342.1|/0/PREDICTED: uncharacterized protein LOC100797322 [Glycine max]
Glyma.07G065000	-	-	-	-	-	-	-	-	-	-	-	-	-	-	-	-	-1.48073	down	0.00335385	0.0223494	8012	ko04626//Plant-pathogen interaction	-	GO:0032550;GO:0016462//pyrophosphatase activity	GO:0006950//response to stress	gi|955330113|ref|XP_006583276.2|/0/PREDICTED: uncharacterized protein LOC100810455 isoform X1 [Glycine max]
Glyma.07G064100	-1.55762	down	1.56e-12	1.99e-10	-	-	-	-	-	-	-	-	-	-	-	-	1.29957	up	0.000236221	0.00345323	9014	ko04626//Plant-pathogen interaction	-	GO:0032550;GO:0016462//pyrophosphatase activity	GO:0006950//response to stress	gi|955330053|ref|XP_014633259.1|/0/PREDICTED: uncharacterized protein LOC100780862 isoform X5 [Glycine max]
Glyma.07G063600	-1.34863	down	2.93214e-09	2.14971e-07	-	-	-	-	-	-	-	-	-	-	-	-	1.92709	up	2.6712e-06	0.000126764	6075	ko04626//Plant-pathogen interaction	-	GO:0036094//small molecule binding;GO:0097159//organic cyclic compound binding;GO:1901363;GO:0032550;GO:0016462//pyrophosphatase activity	GO:0006950//response to stress	gi|947099532|gb|KRH48024.1|;gi|947099531|gb|KRH48023.1|/0;0/hypothetical protein GLYMA_07G063600 [Glycine max];hypothetical protein GLYMA_07G063600 [Glycine max]
Glyma.07G062900	-2.90842	down	2.66e-19	8.7e-17	-	-	-	-	-	-	-	-	-	-	-	-	2.7345	up	0.000138413	0.00235682	8215	ko04626//Plant-pathogen interaction	-	GO:0032550;GO:0016462//pyrophosphatase activity	GO:0006950//response to stress	gi|947099522|gb|KRH48014.1|;gi|571465132|ref|XP_006583266.1|;gi|955330079|ref|XP_014633271.1|/0;0;0/hypothetical protein GLYMA_07G062900 [Glycine max];PREDICTED: uncharacterized protein LOC100808315 isoform X1 [Glycine max];PREDICTED: uncharacterized protein LOC100808315 isoform X2 [Glycine max]
Glyma.07G037000	-	-	-	-	-	-	-	-	-	-	-	-	-	-	-	-	3.45257	up	0.0015209	0.0127021	3965	ko04626//Plant-pathogen interaction	-	GO:0032550	GO:0006950//response to stress;GO:0007154//cell communication	gi|571464738|ref|XP_006583154.1|;gi|947099087|gb|KRH47579.1|/0;0/PREDICTED: disease resistance protein RML1A-like [Glycine max];hypothetical protein GLYMA_07G037000 [Glycine max]
Glyma.06G267300	-	-	-	-	-	-	-	-	-	-	-	-	-	-	-	-	3.01267	up	0.00389649	0.0248304	3171	ko04626//Plant-pathogen interaction	-	GO:0032550	GO:0006950//response to stress;GO:0007154//cell communication	gi|351722777|ref|NP_001235720.1|/0/resistance protein KR3 [Glycine max]
Glyma.06G261500	-	-	-	-	-	-	-	-	-	-	-	-	-	-	-	-	1.69889	up	0.00331226	0.0221758	3650	ko00230//Purine metabolism;ko00240//Pyrimidine metabolism;ko01100//Metabolic pathways;ko03020//RNA polymerase;ko04626//Plant-pathogen interaction	-	GO:0032550	GO:0006950//response to stress;GO:0008037//cell recognition;GO:0007154//cell communication	gi|571462237|ref|XP_003526160.2|/0/PREDICTED: TMV resistance protein N-like [Glycine max]
Glyma.06G260100	-	-	-	-	-	-	-	-	-	-	-	-	-	-	-	-	2.04977	up	6.58e-05	0.00137242	3893	ko00230//Purine metabolism;ko00240//Pyrimidine metabolism;ko01100//Metabolic pathways;ko03020//RNA polymerase;ko04626//Plant-pathogen interaction	-	GO:0032550	GO:0006950//response to stress;GO:0008037//cell recognition;GO:0007154//cell communication	gi|356517237|ref|XP_003527295.1|/0/PREDICTED: TMV resistance protein N [Glycine max]
Glyma.06G259800	-	-	-	-	-	-	-	-	-2.26823	down	0.0013137	0.0477703	-	-	-	-	3.24167	up	0.000552695	0.00628525	4077	ko00230//Purine metabolism;ko00240//Pyrimidine metabolism;ko01100//Metabolic pathways;ko03020//RNA polymerase;ko04626//Plant-pathogen interaction	-	GO:0032550	GO:0006950//response to stress;GO:0008037//cell recognition;GO:0007154//cell communication;GO:0050896//response to stimulus	gi|947107122|gb|KRH55505.1|;gi|947107121|gb|KRH55504.1|/0;0/hypothetical protein GLYMA_06G259800 [Glycine max];hypothetical protein GLYMA_06G259800 [Glycine max]
Glyma.06G259400	-	-	-	-	-	-	-	-	-	-	-	-	-	-	-	-	3.81531	up	1.43e-06	7.94e-05	3959	ko04626//Plant-pathogen interaction	-	GO:0032550	GO:0006950//response to stress;GO:0008037//cell recognition;GO:0007154//cell communication;GO:0050896//response to stimulus	gi|947107112|gb|KRH55495.1|;gi|947107117|gb|KRH55500.1|;gi|947107116|gb|KRH55499.1|;gi|947107115|gb|KRH55498.1|;gi|947107113|gb|KRH55496.1|;gi|947107114|gb|KRH55497.1|/0;0;0;0;0;0/hypothetical protein GLYMA_06G259400 [Glycine max];hypothetical protein GLYMA_06G259400 [Glycine max];hypothetical protein GLYMA_06G259400 [Glycine max];hypothetical protein GLYMA_06G259400 [Glycine max];hypothetical pr…
Glyma.06G256000	-	-	-	-	-	-	-	-	-	-	-	-	-	-	-	-	3.37412	up	1.43168e-05	0.000456235	4316	ko00230//Purine metabolism;ko00240//Pyrimidine metabolism;ko01100//Metabolic pathways;ko03020//RNA polymerase;ko04626//Plant-pathogen interaction	-	GO:0032550	GO:0006950//response to stress;GO:0008037//cell recognition;GO:0007154//cell communication;GO:0050896//response to stimulus	gi|947107062|gb|KRH55445.1|;gi|947107064|gb|KRH55447.1|;gi|955325788|ref|XP_014632205.1|;gi|947107067|gb|KRH55450.1|;gi|947107063|gb|KRH55446.1|;gi|955325790|ref|XP_014632206.1|/0;0;0;0;0;0/hypothetical protein GLYMA_06G256000 [Glycine max];hypothetical protein GLYMA_06G256000 [Glycine max];PREDICTED: disease resistance-like protein CSA1 isoform X1 [Glycine max];hypothetical protein GLYMA_06G2560…
Glyma.05G082500	-	-	-	-	-	-	-	-	-2.21379	down	0.0009091	0.036204	-	-	-	-	2.48655	up	0.00114304	0.0104089	3736	ko00230//Purine metabolism;ko00240//Pyrimidine metabolism;ko01100//Metabolic pathways;ko03020//RNA polymerase;ko04626//Plant-pathogen interaction	-	GO:0032550	GO:0006950//response to stress	gi|571454745|ref|XP_006579882.1|/0/PREDICTED: probable disease resistance protein At5g66900 [Glycine max]
Glyma.05G082400	-	-	-	-	-	-	-	-	-1.28471	down	9.66941e-05	0.00579122	-	-	-	-	-	-	-	-	2976	ko00230//Purine metabolism;ko00240//Pyrimidine metabolism;ko01100//Metabolic pathways;ko03020//RNA polymerase;ko04626//Plant-pathogen interaction	-	GO:0032550	GO:0006950//response to stress	gi|571454747|ref|XP_006579883.1|/0/PREDICTED: probable disease resistance protein At5g66900 [Glycine max]
Glyma.05G082200	-	-	-	-	-	-	-	-	-1.68229	down	0.000434671	0.0202589	-	-	-	-	2.29377	up	0.003137	0.0214712	3498	ko04626//Plant-pathogen interaction	-	GO:0032550	GO:0006950//response to stress	gi|356511730|ref|XP_003524576.1|/0/PREDICTED: probable disease resistance protein At5g66900 isoform X1 [Glycine max]
Glyma.04G134700	-1.6685	down	2.87067e-11	3.15353e-09	-	-	-	-	-	-	-	-	-	-	-	-	2.32564	up	0.000191943	0.00300132	2957	ko04626//Plant-pathogen interaction	GO:0043231//intracellular membrane-bounded organelle	GO:0046914//transition metal ion binding;GO:0016301//kinase activity;GO:0032550;GO:0005515//protein binding;GO:0019787//ubiquitin-like protein transferase activity;GO:0050136//NADH dehydrogenase (quinone) activity	GO:0040007//growth;GO:1902582;GO:0032446//protein modification by small protein conjugation;GO:0006950//response to stress;GO:0009738//abscisic acid-activated signaling pathway;GO:0046903//secretion;GO:0022904//respiratory electron transport chain	gi|947114519|gb|KRH62821.1|/0/hypothetical protein GLYMA_04G134700 [Glycine max]
Glyma.03G236300	-	-	-	-	-	-	-	-	-	-	-	-	-	-	-	-	3.67642	up	0.000594683	0.00663146	3154	ko04626//Plant-pathogen interaction	GO:0031224//intrinsic component of membrane	GO:0046872//metal ion binding;GO:0016209//antioxidant activity;GO:0050664//oxidoreductase activity, acting on NAD(P)H, oxygen as acceptor	GO:0044707;GO:0006950//response to stress;GO:0044710	gi|356505839|ref|XP_003521697.1|;gi|947120277|gb|KRH68526.1|/0;0/PREDICTED: respiratory burst oxidase homolog protein B-like [Glycine max];hypothetical protein GLYMA_03G236300 [Glycine max]
Glyma.03G087500	4.67502	up	2.13103e-13	3.16604e-11	3.878	up	2.0963e-08	3.05172e-06	1.88006	up	4.46838e-05	0.00294814	-	-	-	-	2.60263	up	2.70442e-06	0.000127915	3462	ko00230//Purine metabolism;ko00240//Pyrimidine metabolism;ko01100//Metabolic pathways;ko03020//RNA polymerase;ko04626//Plant-pathogen interaction	-	GO:0032550	GO:0050896//response to stimulus;GO:0006950//response to stress;GO:0007154//cell communication	gi|947117919|gb|KRH66168.1|;gi|947117917|gb|KRH66166.1|;gi|947117918|gb|KRH66167.1|/0;0;0/hypothetical protein GLYMA_03G087500 [Glycine max];hypothetical protein GLYMA_03G087500 [Glycine max];hypothetical protein GLYMA_03G087500 [Glycine max]
Glyma.03G075200	-	-	-	-	-	-	-	-	-	-	-	-	-	-	-	-	1.67137	up	0.00105737	0.00985209	4750	ko00230//Purine metabolism;ko00240//Pyrimidine metabolism;ko01100//Metabolic pathways;ko03020//RNA polymerase;ko04626//Plant-pathogen interaction	-	GO:0032550	GO:0006950//response to stress	gi|351723333|ref|NP_001237787.1|/0/NB-LRR type disease resistance protein [Glycine max]
Glyma.02G041800	-1.03312	down	0.00533409	0.043181	-	-	-	-	-	-	-	-	-	-	-	-	-	-	-	-	4056	ko04626//Plant-pathogen interaction	-	GO:0032550	GO:0006950//response to stress;GO:0007154//cell communication	gi|571438700|ref|XP_006574650.1|;gi|571438704|ref|XP_006574651.1|/0;0/PREDICTED: TMV resistance protein N-like isoform X1 [Glycine max];PREDICTED: TMV resistance protein N-like isoform X2 [Glycine max]
Glyma.01G244500	-	-	-	-	-	-	-	-	-	-	-	-	-	-	-	-	-1.67328	down	0.000480253	0.00563005	1475	ko04626//Plant-pathogen interaction	GO:0005911//cell-cell junction;GO:0044444	-	GO:0006950//response to stress	gi|356497514|ref|XP_003517605.1|/7.23568e-107/PREDICTED: protein SRC2 homolog [Glycine max]
Glyma.01G183400	-	-	-	-	-	-	-	-	-	-	-	-	-	-	-	-	1.21537	up	0.00256648	0.0185313	3041	ko00230//Purine metabolism;ko00240//Pyrimidine metabolism;ko01100//Metabolic pathways;ko03020//RNA polymerase;ko04626//Plant-pathogen interaction	-	GO:0032550	GO:0006950//response to stress	gi|356495456|ref|XP_003516593.1|/0/PREDICTED: probable disease resistance protein At5g66900 [Glycine max]
Glyma.01G039000	-1.50558	down	0.000133001	0.00249287	-	-	-	-	-	-	-	-	-	-	-	-	-	-	-	-	4612	ko04626//Plant-pathogen interaction	-	GO:0016462//pyrophosphatase activity;GO:0032550	GO:0006950//response to stress;GO:0007154//cell communication	gi|571434029|ref|XP_006573080.1|;gi|947126871|gb|KRH74725.1|/0;0/PREDICTED: TMV resistance protein N-like [Glycine max];hypothetical protein GLYMA_01G039000 [Glycine max]
Glyma.01G010500	-	-	-	-	-	-	-	-	-3.51484	down	1.76681e-05	0.001288	-	-	-	-	-	-	-	-	3423	ko04626//Plant-pathogen interaction	-	GO:0032550	GO:0006950//response to stress	gi|351721361|ref|NP_001235671.1|/0/NBS-LRR type disease resistance protein [Glycine max]
Glyma.01G013500	-1.68177	down	0.000117458	0.00226617	-	-	-	-	-	-	-	-	-	-	-	-	-	-	-	-	2710	ko04626//Plant-pathogen interaction	-	GO:0004672//protein kinase activity	GO:0044237//cellular metabolic process	gi|356497629|ref|XP_003517662.1|/0/PREDICTED: putative receptor-like protein kinase At4g00960 [Glycine max]
Glyma.01G019700	-	-	-	-	-	-	-	-	-	-	-	-	-1.2556	down	0.000449411	0.0225221	-	-	-	-	1586	ko04075//Plant hormone signal transduction;ko04626//Plant-pathogen interaction	-	GO:0005515//protein binding	-	gi|918463553|gb|ALA09121.1|;gi|947126586|gb|KRH74440.1|;gi|571433718|ref|XP_006572984.1|/0;0;0/bHLH transcription factor, partial [Glycine max] ;hypothetical protein GLYMA_01G019700 [Glycine max];PREDICTED: transcription factor bHLH93-like isoform X2 [Glycine max]
Glyma.01G169500	-	-	-	-	-	-	-	-	-	-	-	-	1.34073	up	0.000634518	0.0286575	-	-	-	-	1949	ko04626//Plant-pathogen interaction	-	-	-	gi|571435744|ref|XP_003516553.2|/0/PREDICTED: leucine-rich repeat receptor-like protein kinase PXL2 [Glycine max]
Glyma.02G030500	1.34889	up	0.00401401	0.0350979	-	-	-	-	-	-	-	-	-	-	-	-	-	-	-	-	1808	ko00230//Purine metabolism;ko00240//Pyrimidine metabolism;ko01100//Metabolic pathways;ko03020//RNA polymerase;ko04626//Plant-pathogen interaction	-	-	-	gi|734394680|gb|KHN28666.1|/0/Disease resistance RPP13-like protein 4 [Glycine soja]
Glyma.02G060800	-	-	-	-	-	-	-	-	-	-	-	-	3.3442	up	2.71186e-06	0.000330291	-	-	-	-	519	ko04075//Plant hormone signal transduction;ko04626//Plant-pathogen interaction	-	-	-	gi|571438947|ref|XP_003519913.2|/1.87092e-112/PREDICTED: STS14 protein-like [Glycine max]
Glyma.02G122000	-1.61184	down	0.00131289	0.0153794	-	-	-	-	-	-	-	-	-	-	-	-	-	-	-	-	2634	ko04626//Plant-pathogen interaction	GO:0071944//cell periphery;GO:0044464	GO:0032550;GO:0004672//protein kinase activity	GO:0006464//cellular protein modification process;GO:0044767;GO:0006796//phosphate-containing compound metabolic process	gi|571439797|ref|XP_003520131.2|;gi|947122773|gb|KRH70979.1|/0;0/PREDICTED: receptor-like protein kinase FERONIA [Glycine max];hypothetical protein GLYMA_02G122000 [Glycine max]
Glyma.02G133000	-	-	-	-	-	-	-	-	-	-	-	-	-1.10723	down	0.000218392	0.0131114	-	-	-	-	1274	ko04626//Plant-pathogen interaction	-	GO:0046872//metal ion binding;GO:0016491//oxidoreductase activity	-	gi|351721626|ref|NP_001235680.1|/2.1097e-124/uncharacterized protein LOC100499763 [Glycine max]
Glyma.02G186900	-3.67714	down	5.80709e-08	3.21583e-06	-	-	-	-	-3.72791	down	6.2454e-06	0.000515583	-	-	-	-	-	-	-	-	780	ko04626//Plant-pathogen interaction	-	-	-	gi|947123831|gb|KRH72037.1|/1.48469e-120/hypothetical protein GLYMA_02G186900 [Glycine max]
Glyma.02G189800	-7.18474	down	7.47455e-18	2.0329e-15	-	-	-	-	-8.00003	down	1.60021e-06	0.000152745	-	-	-	-	-	-	-	-	1077	ko04626//Plant-pathogen interaction	-	GO:0004672//protein kinase activity	GO:0044237//cellular metabolic process	gi|947123865|gb|KRH72071.1|/0/hypothetical protein GLYMA_02G189800 [Glycine max]
Glyma.02G228300	-	-	-	-	-	-	-	-	-3.04221	down	0.000897817	0.0359421	-	-	-	-	-	-	-	-	1506	ko04626//Plant-pathogen interaction	-	GO:0016301//kinase activity	GO:0044238//primary metabolic process;GO:0044260;GO:0016310//phosphorylation	gi|734432078|gb|KHN46141.1|/0/Mitogen-activated protein kinase kinase kinase 2 [Glycine soja]
Glyma.02G263900	-1.01883	down	0.00297699	0.0281229	-	-	-	-	-	-	-	-	-	-	-	-	-	-	-	-	2483	ko04626//Plant-pathogen interaction	GO:0031224//intrinsic component of membrane	GO:0016301//kinase activity;GO:0032550	GO:0006796//phosphate-containing compound metabolic process;GO:0006464//cellular protein modification process	gi|356499209|ref|XP_003518434.1|/0/PREDICTED: probable inactive receptor-like protein kinase At3g56050 [Glycine max]
Glyma.03G037300	-1.72408	down	8.07515e-05	0.00168108	-	-	-	-	-	-	-	-	-	-	-	-	-	-	-	-	4743	ko00230//Purine metabolism;ko00240//Pyrimidine metabolism;ko01100//Metabolic pathways;ko03020//RNA polymerase;ko04626//Plant-pathogen interaction	-	-	-	gi|571444245|ref|XP_006576452.1|/0/PREDICTED: putative disease resistance protein At3g14460 isoform X1 [Glycine max]
Glyma.03G087600	-1.08868	down	0.000350469	0.00551299	-	-	-	-	-	-	-	-	-	-	-	-	-	-	-	-	3387	ko04626//Plant-pathogen interaction	-	-	-	gi|947117921|gb|KRH66170.1|;gi|947117920|gb|KRH66169.1|/0;0/hypothetical protein GLYMA_03G087600, partial [Glycine max];hypothetical protein GLYMA_03G087600, partial [Glycine max]
Glyma.03G165800	-3.11091	down	3.89716e-06	0.000133705	-	-	-	-	-	-	-	-	-	-	-	-	-	-	-	-	4009	ko04626//Plant-pathogen interaction	GO:0031224//intrinsic component of membrane	GO:0004672//protein kinase activity;GO:0032550	GO:0006468//protein phosphorylation	gi|571445952|ref|XP_003520610.2|/0/PREDICTED: probable LRR receptor-like serine/threonine-protein kinase At4g08850 [Glycine max]
Glyma.03G225000	-2.187	down	0.000875981	0.0113669	-	-	-	-	-	-	-	-	-	-	-	-	-	-	-	-	2036	ko04075//Plant hormone signal transduction;ko04712//Circadian rhythm - plant;ko04626//Plant-pathogen interaction	-	-	-	gi|571446784|ref|XP_003520776.2|/0/PREDICTED: transcription factor PIF3-like [Glycine max]
Glyma.03G232500	-	-	-	-	-	-	-	-	-2.10098	down	0.00129154	0.0470765	-	-	-	-	-	-	-	-	2258	ko04070//Phosphatidylinositol signaling system;ko04626//Plant-pathogen interaction	-	-	-	gi|356505783|ref|XP_003521669.1|;gi|571446892|ref|XP_006577216.1|/0;0/PREDICTED: calmodulin-binding protein 60 B isoform X1 [Glycine max];PREDICTED: calmodulin-binding protein 60 B isoform X2 [Glycine max]
Glyma.04G054200	4.36501	up	2.66125e-13	3.91925e-11	-	-	-	-	-	-	-	-	-	-	-	-	-	-	-	-	987	ko04626//Plant-pathogen interaction	-	GO:0001071//nucleic acid binding transcription factor activity;GO:0003677//DNA binding	GO:0050896//response to stimulus;GO:0050794//regulation of cellular process;GO:0006351//transcription, DNA-templated	gi|356507032|ref|XP_003522275.1|/5.63141e-118/PREDICTED: probable WRKY transcription factor 50 [Glycine max]
Glyma.04G090100	1.39161	up	0.00180585	0.0194104	-	-	-	-	-	-	-	-	-	-	-	-	-	-	-	-	1549	ko04075//Plant hormone signal transduction;ko04626//Plant-pathogen interaction	-	GO:0005515//protein binding	-	gi|947113857|gb|KRH62159.1|/0/hypothetical protein GLYMA_04G090100 [Glycine max]
Glyma.04G136200	-	-	-	-	-	-	-	-	-5.59822	down	2.7807e-05	0.00194808	-	-	-	-	-	-	-	-	919	ko04626//Plant-pathogen interaction	-	GO:0046872//metal ion binding	-	gi|947114537|gb|KRH62839.1|/1.15828e-96/hypothetical protein GLYMA_04G136200 [Glycine max]
Glyma.04G188700	-	-	-	-	-	-	-	-	-	-	-	-	1.43891	up	1.01309e-06	0.000144745	-	-	-	-	1936	ko04626//Plant-pathogen interaction	GO:0031981//nuclear lumen;GO:0005576//extracellular region;GO:0009534//chloroplast thylakoid;GO:0009526//plastid envelope	GO:0032550;GO:0017111//nucleoside-triphosphatase activity;GO:0008135//translation factor activity, nucleic acid binding	GO:0006412//translation;GO:0009154//purine ribonucleotide catabolic process	gi|356508726|ref|XP_003523105.1|/0/PREDICTED: elongation factor Tu, chloroplastic-like [Glycine max]
Glyma.05G021100	-1.10364	down	3.08931e-05	0.000764394	-	-	-	-	-	-	-	-	-	-	-	-	-	-	-	-	3526	ko04626//Plant-pathogen interaction	GO:0031224//intrinsic component of membrane	GO:0046872//metal ion binding;GO:0016651//oxidoreductase activity, acting on NAD(P)H;GO:0016209//antioxidant activity	GO:0044710	gi|571453402|ref|XP_006579505.1|/0/PREDICTED: respiratory burst oxidase homolog protein A-like isoform X1 [Glycine max]
Glyma.05G085200	-	-	-	-	-	-	-	-	-2.55293	down	7.52077e-06	0.000599796	-	-	-	-	-	-	-	-	3109	ko04626//Plant-pathogen interaction	-	GO:0046872//metal ion binding	-	gi|734386654|gb|KHN25017.1|/2.19482e-121/Calmodulin-like protein 1 [Glycine soja]
Glyma.06G147100	8.34201	up	1.33221e-15	2.75637e-13	-	-	-	-	-	-	-	-	-	-	-	-	-	-	-	-	1180	ko04626//Plant-pathogen interaction	-	-	GO:0009987//cellular process	gi|356516303|ref|XP_003526835.1|/1.14509e-118/PREDICTED: probable WRKY transcription factor 51 [Glycine max]
Glyma.06G147500	1.2473	up	6.41692e-05	0.00138725	-	-	-	-	-	-	-	-	-	-	-	-	-	-	-	-	1417	ko04626//Plant-pathogen interaction	-	-	-	gi|571460585|ref|XP_003526838.2|;gi|955324384|ref|XP_014631935.1|;gi|571460587|ref|XP_006581742.1|/2.30138e-139;1.08246e-113;8.10111e-123/PREDICTED: probable WRKY transcription factor 13 isoform X1 [Glycine max];PREDICTED: probable WRKY transcription factor 13 isoform X3 [Glycine max];PREDICTED: probable WRKY transcription factor 13 isoform X2 [Glycine max]
Glyma.06G155500	-	-	-	-	-	-	-	-	-	-	-	-	1.24487	up	0.000874646	0.0362521	-	-	-	-	2762	ko04626//Plant-pathogen interaction	-	GO:0004672//protein kinase activity;GO:0032550	GO:0050896//response to stimulus;GO:0006464//cellular protein modification process	gi|356516377|ref|XP_003526871.1|/0/PREDICTED: probable receptor-like serine/threonine-protein kinase At5g57670 [Glycine max]
Glyma.06G176900	-	-	-	-	-	-	-	-	-	-	-	-	1.30953	up	1.98741e-05	0.0019603	-	-	-	-	2054	ko04626//Plant-pathogen interaction	GO:0031981//nuclear lumen;GO:0005576//extracellular region;GO:0009534//chloroplast thylakoid;GO:0009526//plastid envelope	GO:0032550;GO:0017111//nucleoside-triphosphatase activity;GO:0008135//translation factor activity, nucleic acid binding	GO:0006412//translation;GO:0009154//purine ribonucleotide catabolic process	gi|356516623|ref|XP_003526993.1|/0/PREDICTED: elongation factor Tu, chloroplastic [Glycine max]
Glyma.06G256600	-2.26551	down	0.000242516	0.00408738	-	-	-	-	-	-	-	-	-	-	-	-	-	-	-	-	2728	ko04626//Plant-pathogen interaction	-	-	-	gi|947107079|gb|KRH55462.1|;gi|947107078|gb|KRH55461.1|/0;0/hypothetical protein GLYMA_06G256600 [Glycine max];hypothetical protein GLYMA_06G256600 [Glycine max]
Glyma.07G003200	-	-	-	-	-	-	-	-	-	-	-	-	1.33451	up	0.000475569	0.0234767	-	-	-	-	2281	ko04626//Plant-pathogen interaction	GO:0043231//intracellular membrane-bounded organelle	GO:0032550;GO:0004672//protein kinase activity	GO:0045682//regulation of epidermis development;GO:0045087//innate immune response;GO:0006464//cellular protein modification process;GO:0006796//phosphate-containing compound metabolic process;GO:0090567	gi|356521707|ref|XP_003529493.1|/0/PREDICTED: mitogen-activated protein kinase kinase 4 [Glycine max]
Glyma.07G101100	-	-	-	-	-	-	-	-	-	-	-	-	1.64321	up	6.9154e-05	0.00535187	-	-	-	-	911	ko04626//Plant-pathogen interaction	GO:0016020//membrane;GO:0043231//intracellular membrane-bounded organelle	GO:0046872//metal ion binding	-	gi|356520641|ref|XP_003528969.1|/3.56334e-128/PREDICTED: probable calcium-binding protein CML18 [Glycine max]
Glyma.07G143500	2.64784	up	0.000726027	0.00985322	-	-	-	-	-	-	-	-	-	-	-	-	-	-	-	-	3222	ko04626//Plant-pathogen interaction	-	-	-	gi|947100766|gb|KRH49258.1|/0/hypothetical protein GLYMA_07G143500 [Glycine max]
Glyma.07G148500	-1.02109	down	0.00404049	0.0352563	-	-	-	-	-	-	-	-	-	-	-	-	-	-	-	-	1859	ko04626//Plant-pathogen interaction	-	GO:0004672//protein kinase activity;GO:0032550	GO:0006464//cellular protein modification process	gi|571466375|ref|XP_006583644.1|/0/PREDICTED: putative serine/threonine-protein kinase isoform X1 [Glycine max]
Glyma.07G188800	-1.12341	down	0.00443082	0.0376776	-	-	-	-	-	-	-	-	-	-	-	-	-	-	-	-	3106	ko04626//Plant-pathogen interaction	-	GO:0004672//protein kinase activity;GO:0032550	GO:0006796//phosphate-containing compound metabolic process;GO:0006464//cellular protein modification process;GO:0008037//cell recognition	gi|356519528|ref|XP_003528424.1|;gi|947101435|gb|KRH49927.1|/0;0/PREDICTED: G-type lectin S-receptor-like serine/threonine-protein kinase B120 isoform X1 [Glycine max];hypothetical protein GLYMA_07G188800 [Glycine max]
Glyma.07G229500	3.72869	up	2.51407e-09	1.87168e-07	-	-	-	-	-	-	-	-	-	-	-	-	-	-	-	-	671	ko04626//Plant-pathogen interaction	-	-	-	gi|571467514|ref|XP_006583962.1|/3.62461e-119/PREDICTED: probable calcium-binding protein CML45 [Glycine max]
Glyma.08G089100	-1.18544	down	0.00422659	0.036414	-	-	-	-	-	-	-	-	-	-	-	-	-	-	-	-	2077	ko04075//Plant hormone signal transduction;ko04626//Plant-pathogen interaction	-	GO:0005515//protein binding	-	gi|734395411|gb|KHN28921.1|/0/Transcription factor bHLH91 [Glycine soja]
Glyma.08G140900	-1.25902	down	1.41763e-06	5.47649e-05	-	-	-	-	-	-	-	-	-	-	-	-	-	-	-	-	2896	ko04626//Plant-pathogen interaction	GO:0009526//plastid envelope	GO:0016740//transferase activity	-	gi|356525527|ref|XP_003531376.1|/0/PREDICTED: uncharacterized protein sll1770-like [Glycine max]
Glyma.08G300900	-	-	-	-	4.05723	up	7.93988e-12	1.64488e-09	-	-	-	-	-	-	-	-	-	-	-	-	804	ko04626//Plant-pathogen interaction	GO:0043231//intracellular membrane-bounded organelle	-	-	gi|947097334|gb|KRH45919.1|/0/hypothetical protein GLYMA_08G300900 [Glycine max]
Glyma.08G317400	-1.28099	down	0.00405617	0.0353382	-	-	-	-	-	-	-	-	-	-	-	-	-	-	-	-	4364	ko04626//Plant-pathogen interaction	-	-	-	gi|955337909|ref|XP_014634887.1|/0/PREDICTED: disease resistance protein RPM1-like [Glycine max]
Glyma.09G048300	-1.28976	down	9.82511e-12	1.13089e-09	-	-	-	-	-	-	-	-	-	-	-	-	-	-	-	-	4435	ko04626//Plant-pathogen interaction	GO:0016020//membrane	GO:0036094//small molecule binding;GO:0004672//protein kinase activity;GO:1901363;GO:0097159//organic cyclic compound binding	GO:0006796//phosphate-containing compound metabolic process	gi|571476366|ref|XP_003533521.2|/0/PREDICTED: LRR receptor-like serine/threonine-protein kinase GSO1 [Glycine max]
Glyma.09G060200	-1.68862	down	0.00016372	0.00295423	-	-	-	-	-2.21211	down	9.06722e-06	0.000712327	-	-	-	-	-	-	-	-	1321	ko04075//Plant hormone signal transduction;ko04626//Plant-pathogen interaction	-	GO:0005515//protein binding	-	gi|358248852|ref|NP_001239951.1|/4.42554e-170/transcription factor bHLH35-like [Glycine max]
Glyma.09G073200	-2.89501	down	8.92267e-08	4.72737e-06	-	-	-	-	-	-	-	-	-	-	-	-	-	-	-	-	3397	ko04626//Plant-pathogen interaction	GO:0031224//intrinsic component of membrane	GO:0046872//metal ion binding;GO:0016651//oxidoreductase activity, acting on NAD(P)H;GO:0016209//antioxidant activity	GO:0044710	gi|947088885|gb|KRH37550.1|;gi|571476753|ref|XP_006587062.1|/0;0/hypothetical protein GLYMA_09G073200 [Glycine max];PREDICTED: respiratory burst oxidase homolog protein E-like [Glycine max]
Glyma.09G131500	-	-	-	-	-	-	-	-	-2.5086	down	6.29308e-08	7.36483e-06	-	-	-	-	-	-	-	-	2458	ko04141//Protein processing in endoplasmic reticulum;ko04626//Plant-pathogen interaction	-	GO:0005515//protein binding;GO:0032550	GO:0050896//response to stimulus;GO:0044267//cellular protein metabolic process	gi|959092738|ref|NP_001304616.1|/0/heat shock protein 83 [Glycine max]
Glyma.09G173800	-1.11713	down	0.000813407	0.0107746	-	-	-	-	-	-	-	-	-	-	-	-	-	-	-	-	1965	ko04075//Plant hormone signal transduction;ko04626//Plant-pathogen interaction	GO:0005911//cell-cell junction;GO:0031224//intrinsic component of membrane;GO:0044437	GO:0016301//kinase activity;GO:0032550	GO:0006796//phosphate-containing compound metabolic process;GO:0006464//cellular protein modification process	gi|947090375|gb|KRH39040.1|/0/hypothetical protein GLYMA_09G173800 [Glycine max]
Glyma.09G208900	-1.4835	down	3.53952e-05	0.000850215	-	-	-	-	-	-	-	-	-	-	-	-	-	-	-	-	2205	ko00230//Purine metabolism;ko00240//Pyrimidine metabolism;ko01100//Metabolic pathways;ko03020//RNA polymerase;ko04626//Plant-pathogen interaction	-	-	-	gi|947090939|gb|KRH39604.1|/0/hypothetical protein GLYMA_09G208900 [Glycine max]
Glyma.09G216400	-	-	-	-	8.34377	up	3.44169e-12	7.36612e-10	-	-	-	-	-	-	-	-	-	-	-	-	4263	ko04626//Plant-pathogen interaction	GO:0031224//intrinsic component of membrane	GO:0004672//protein kinase activity;GO:0032550;GO:0016301//kinase activity	GO:0006796//phosphate-containing compound metabolic process;GO:0006464//cellular protein modification process	gi|947091060|gb|KRH39725.1|;gi|571478728|ref|XP_006587651.1|/0;0/hypothetical protein GLYMA_09G216400 [Glycine max];PREDICTED: probable LRR receptor-like serine/threonine-protein kinase At3g47570 isoform X2 [Glycine max]
Glyma.09G270400	-1.20436	down	0.00124576	0.0147845	-	-	-	-	-	-	-	-	-	-	-	-	-	-	-	-	1365	ko04075//Plant hormone signal transduction;ko04626//Plant-pathogen interaction	-	GO:0016772//transferase activity, transferring phosphorus-containing groups	-	gi|955342880|ref|XP_014617928.1|/7.75255e-114/PREDICTED: cysteine-rich receptor-like protein kinase 24 [Glycine max]
Glyma.10G026000	-1.03503	down	2.29184e-06	8.39222e-05	-	-	-	-	-	-	-	-	-	-	-	-	-	-	-	-	2818	ko04075//Plant hormone signal transduction;ko04626//Plant-pathogen interaction	-	-	GO:0044763;GO:0031326;GO:0006351//transcription, DNA-templated	gi|571481338|ref|XP_006588626.1|/0/PREDICTED: basic helix-loop-helix protein A-like [Glycine max]
Glyma.10G109200	-1.94308	down	2.70812e-07	1.26956e-05	-	-	-	-	-	-	-	-	-	-	-	-	-	-	-	-	2092	ko04626//Plant-pathogen interaction	-	GO:0036094//small molecule binding;GO:0004672//protein kinase activity;GO:1901363;GO:0097159//organic cyclic compound binding;GO:0016772//transferase activity, transferring phosphorus-containing groups;GO:0032550	GO:0006464//cellular protein modification process	gi|571482431|ref|XP_006588951.1|;gi|947084513|gb|KRH33234.1|;gi|571482433|ref|XP_006588952.1|;gi|955345591|ref|XP_014618594.1|;gi|571482429|ref|XP_006588950.1|/0;0;0;0;0/PREDICTED: cysteine-rich receptor-like protein kinase 19 isoform X2 [Glycine max];hypothetical protein GLYMA_10G109200 [Glycine max];PREDICTED: cysteine-rich receptor-like protein kinase 25 isoform X3 [Glycine max];PREDICTED: cys…
Glyma.10G186000	-1.15193	down	1.60377e-06	6.11847e-05	-	-	-	-	-	-	-	-	-	-	-	-	-	-	-	-	1228	ko04626//Plant-pathogen interaction	-	GO:0004672//protein kinase activity;GO:0032550	GO:0006796//phosphate-containing compound metabolic process;GO:0006464//cellular protein modification process	gi|351723241|ref|NP_001237016.1|/0/phosphoenolpyruvate-carboxylase kinase [Glycine max]
Glyma.10G195700	1.37747	up	0.000322699	0.00516225	2.14603	up	8.69822e-05	0.00735887	-	-	-	-	-	-	-	-	-	-	-	-	3252	ko04626//Plant-pathogen interaction	GO:0031224//intrinsic component of membrane	GO:0004672//protein kinase activity;GO:0032550;GO:0016772//transferase activity, transferring phosphorus-containing groups	GO:0006796//phosphate-containing compound metabolic process;GO:0006464//cellular protein modification process	gi|356533862|ref|XP_003535477.1|;gi|734415812|gb|KHN37899.1|/0;0/PREDICTED: receptor-like protein kinase [Glycine max];Receptor-like protein kinase [Glycine soja]
Glyma.10G252700	1.93406	up	0.000343758	0.00543008	-	-	-	-	-	-	-	-	-	-	-	-	-	-	-	-	2254	ko04075//Plant hormone signal transduction;ko04626//Plant-pathogen interaction	-	GO:0004672//protein kinase activity;GO:0032550	GO:0006796//phosphate-containing compound metabolic process;GO:0006464//cellular protein modification process	gi|947086881|gb|KRH35602.1|;gi|571480841|ref|XP_006588454.1|;gi|947086882|gb|KRH35603.1|/0;0;0/hypothetical protein GLYMA_10G252700 [Glycine max];PREDICTED: cysteine-rich receptor-like protein kinase 10-like isoform X1 [Glycine max];hypothetical protein GLYMA_10G252700 [Glycine max]
Glyma.10G253200	3.2775	up	5.20014e-09	3.61598e-07	-	-	-	-	-	-	-	-	-	-	-	-	-	-	-	-	2615	ko04075//Plant hormone signal transduction;ko04626//Plant-pathogen interaction	-	-	-	gi|356534242|ref|XP_003535666.1|/0/PREDICTED: cysteine-rich receptor-like protein kinase 26 [Glycine max]
Glyma.10G263200	-	-	-	-	-	-	-	-	1.04849	up	0.000867456	0.0350946	1.62627	up	2.85088e-07	4.7068e-05	-	-	-	-	1670	ko04626//Plant-pathogen interaction	-	-	-	gi|356536184|ref|XP_003536619.1|/0/PREDICTED: probable LRR receptor-like serine/threonine-protein kinase At4g20940 [Glycine max]
Glyma.11G045700	-	-	-	-	-	-	-	-	-	-	-	-	1.34784	up	3.22854e-05	0.00287367	-	-	-	-	1666	ko04075//Plant hormone signal transduction;ko04626//Plant-pathogen interaction	-	-	-	gi|359806711|ref|NP_001241548.1|/1.26439e-162/LRR receptor-like serine/threonine-protein kinase GSO2-like precursor [Glycine max]
Glyma.11G056500	1.43199	up	0.00272511	0.0263941	-	-	-	-	-	-	-	-	-	-	-	-	-	-	-	-	1480	ko04626//Plant-pathogen interaction	-	GO:0046872//metal ion binding	-	gi|734423154|gb|KHN42075.1|/2.89802e-135/Calmodulin-like protein 1 [Glycine soja]
Glyma.11G073800	-	-	-	-	-	-	-	-	-	-	-	-	1.5327	up	1.36104e-06	0.000187256	-	-	-	-	1986	ko04626//Plant-pathogen interaction	-	-	-	gi|359807401|ref|NP_001241130.1|/0/LRR receptor-like serine/threonine-protein kinase GSO1-like precursor [Glycine max]
Glyma.12G143000	-2.3424	down	0.000585379	0.00828447	-	-	-	-	-	-	-	-	-	-	-	-	-	-	-	-	2742	ko04626//Plant-pathogen interaction	-	GO:0016301//kinase activity;GO:0004672//protein kinase activity;GO:0032550	GO:0009987//cellular process;GO:0006464//cellular protein modification process	gi|734414229|gb|KHN37217.1|;gi|947077133|gb|KRH25973.1|;gi|571493480|ref|XP_006592565.1|;gi|571493478|ref|XP_006592564.1|/0;0;0;0/G-type lectin S-receptor-like serine/threonine-protein kinase [Glycine soja] ;hypothetical protein GLYMA_12G143000 [Glycine max];PREDICTED: G-type lectin S-receptor-like serine/threonine-protein kinase SD1-1 isoform X3 [Glycine max];PREDICTED: G-type lectin S-receptor-…
Glyma.12G172700	1.32281	up	0.00330833	0.0305513	-	-	-	-	-	-	-	-	-	-	-	-	-	-	-	-	2039	ko04626//Plant-pathogen interaction	-	GO:0016301//kinase activity;GO:0032550	GO:0006464//cellular protein modification process	gi|571493920|ref|XP_006592693.1|/0/PREDICTED: serine/threonine-protein kinase CDL1-like [Glycine max]
Glyma.12G175300	-1.63154	down	1.28248e-10	1.25367e-08	-	-	-	-	-	-	-	-	-	-	-	-	-	-	-	-	2971	ko04626//Plant-pathogen interaction	GO:0044440	GO:0032550;GO:0004672//protein kinase activity;GO:0019899//enzyme binding	GO:0010087//phloem or xylem histogenesis;GO:0006464//cellular protein modification process;GO:0006796//phosphate-containing compound metabolic process	gi|955351956|ref|XP_014619794.1|;gi|947077612|gb|KRH26452.1|;gi|351725463|ref|NP_001237605.1|;gi|955351954|ref|XP_014619793.1|/0;0;0;0/PREDICTED: protein kinase family protein isoform X3 [Glycine max];hypothetical protein GLYMA_12G175300 [Glycine max];protein kinase family protein precursor [Glycine max];PREDICTED: protein kinase family protein isoform X2 [Glycine max]
Glyma.12G198600	-1.29853	down	0.00195264	0.0205991	-	-	-	-	-	-	-	-	-	-	-	-	-	-	-	-	2860	ko04075//Plant hormone signal transduction;ko04626//Plant-pathogen interaction	-	GO:0004672//protein kinase activity;GO:0032550	GO:0006796//phosphate-containing compound metabolic process;GO:0006464//cellular protein modification process;GO:0008037//cell recognition	gi|955355212|ref|XP_014620518.1|;gi|571494369|ref|XP_006592830.1|/0;0/PREDICTED: G-type lectin S-receptor-like serine/threonine-protein kinase At2g19130 isoform X1 [Glycine max];PREDICTED: G-type lectin S-receptor-like serine/threonine-protein kinase At2g19130 isoform X2 [Glycine max]
Glyma.13G053700	4.07098	up	2.44398e-16	5.42257e-14	2.81783	up	8.91507e-06	0.000929411	-	-	-	-	-	-	-	-	-	-	-	-	3047	ko04626//Plant-pathogen interaction	-	GO:0004672//protein kinase activity;GO:0032550	GO:0006796//phosphate-containing compound metabolic process;GO:0006464//cellular protein modification process	gi|947069467|gb|KRH18358.1|/0/hypothetical protein GLYMA_13G053700 [Glycine max]
Glyma.13G054300	-2.83737	down	1.24094e-07	6.3028e-06	-2.52324	down	0.000178047	0.0140003	-	-	-	-	-	-	-	-	-	-	-	-	2535	ko04626//Plant-pathogen interaction	-	GO:0004672//protein kinase activity;GO:0032550	GO:0006796//phosphate-containing compound metabolic process;GO:0006464//cellular protein modification process	gi|351727166|ref|NP_001238431.1|/0/FERONIA receptor-like kinase precursor [Glycine max]
Glyma.13G080700	-1.52165	down	0.000873914	0.0113513	-	-	-	-	-	-	-	-	-	-	-	-	-	-	-	-	1185	ko04626//Plant-pathogen interaction	GO:0031225//anchored component of membrane	GO:0005539//glycosaminoglycan binding	GO:0044036//cell wall macromolecule metabolic process;GO:0002376//immune system process	gi|947069872|gb|KRH18763.1|;gi|947069871|gb|KRH18762.1|/0;0/hypothetical protein GLYMA_13G080700 [Glycine max];hypothetical protein GLYMA_13G080700 [Glycine max]
Glyma.13G184800	-1.6136	down	2.18186e-06	8.06834e-05	-	-	-	-	-1.74789	down	0.000349474	0.0171619	-1.99492	down	1.42174e-05	0.00145194	-	-	-	-	4261	ko00230//Purine metabolism;ko00240//Pyrimidine metabolism;ko01100//Metabolic pathways;ko03020//RNA polymerase;ko04626//Plant-pathogen interaction	-	-	-	gi|955358201|ref|XP_014621131.1|/0/PREDICTED: putative disease resistance protein At3g14460 isoform X1 [Glycine max]
Glyma.13G190000	-2.22437	down	1.57473e-07	7.80997e-06	-	-	-	-	-1.99345	down	0.000741044	0.0307964	-2.0565	down	0.0005262	0.025222	-	-	-	-	3735	ko00230//Purine metabolism;ko00240//Pyrimidine metabolism;ko01100//Metabolic pathways;ko03020//RNA polymerase;ko04626//Plant-pathogen interaction	-	-	-	gi|947071732|gb|KRH20623.1|/0/hypothetical protein GLYMA_13G190000 [Glycine max]
Glyma.13G195600	-1.40965	down	0.0031794	0.0296366	-	-	-	-	-	-	-	-	-	-	-	-	-	-	-	-	3826	ko00230//Purine metabolism;ko00240//Pyrimidine metabolism;ko01100//Metabolic pathways;ko03020//RNA polymerase;ko04626//Plant-pathogen interaction	-	-	-	gi|356546346|ref|XP_003541587.1|/0/PREDICTED: putative disease resistance RPP13-like protein 1 isoform X1 [Glycine max]
Glyma.13G365900	-	-	-	-	-	-	-	-	1.39809	up	0.000117846	0.00685642	1.54189	up	0.00031234	0.0170499	-	-	-	-	1531	ko04626//Plant-pathogen interaction	-	GO:0016772//transferase activity, transferring phosphorus-containing groups	GO:0006796//phosphate-containing compound metabolic process;GO:0051301//cell division;GO:0001101//response to acid chemical	gi|947074694|gb|KRH23585.1|/0/hypothetical protein GLYMA_13G365900 [Glycine max]
Glyma.14G080100	-1.78846	down	2.51646e-05	0.000641964	-	-	-	-	-	-	-	-	-	-	-	-	-	-	-	-	2915	ko04626//Plant-pathogen interaction	-	GO:0016301//kinase activity;GO:0032550;GO:0016772//transferase activity, transferring phosphorus-containing groups	GO:0006464//cellular protein modification process	gi|947066158|gb|KRH15301.1|;gi|571508197|ref|XP_006595955.1|;gi|356553923|ref|XP_003545300.1|;gi|571508200|ref|XP_006595956.1|/0;0;0;0/hypothetical protein GLYMA_14G080100 [Glycine max];PREDICTED: mitogen-activated protein kinase kinase kinase 1-like isoform X2 [Glycine max];PREDICTED: MAP kinase kinase kinase mkh1-like isoform X1 [Glycine max];PREDICTED: mitogen-activated protein kinase kinase k…
Glyma.14G173100	-1.72064	down	0.0010578	0.0131156	-	-	-	-	-	-	-	-	-	-	-	-	-	-	-	-	909	ko04626//Plant-pathogen interaction	-	-	-	gi|947067578|gb|KRH16721.1|/0/hypothetical protein GLYMA_14G173100 [Glycine max]
Glyma.14G178000	-	-	-	-	-	-	-	-	-	-	-	-	-1.24008	down	0.000397155	0.0204907	-	-	-	-	1985	ko04075//Plant hormone signal transduction;ko04626//Plant-pathogen interaction	-	GO:0005515//protein binding	-	gi|356552929|ref|XP_003544814.1|/0/PREDICTED: transcription factor bHLH96-like [Glycine max]
Glyma.14G186600	-1.51493	down	0.00611772	0.0478701	-	-	-	-	-	-	-	-	-	-	-	-	-	-	-	-	4349	ko04626//Plant-pathogen interaction	-	-	-	gi|571511306|ref|XP_006596398.1|/0/PREDICTED: probable disease resistance protein At4g27220 [Glycine max]
Glyma.14G199400	-2.73449	down	3.52877e-10	3.09111e-08	-	-	-	-	-	-	-	-	-	-	-	-	-	-	-	-	2634	ko04626//Plant-pathogen interaction	-	-	-	gi|955362015|ref|XP_014622020.1|/0/PREDICTED: disease resistance protein RPP13-like [Glycine max]
Glyma.14G215800	-1.686	down	2.04744e-05	0.0005437	-	-	-	-	-	-	-	-	-	-	-	-	-	-	-	-	426	ko04626//Plant-pathogen interaction	GO:0016020//membrane	GO:0046872//metal ion binding	GO:0009642//response to light intensity;GO:0006952//defense response;GO:0010038//response to metal ion;GO:0001101//response to acid chemical;GO:0000302//response to reactive oxygen species;GO:0009908//flower development;GO:0009725//response to hormone;GO:0048571//long-day photoperiodism;GO:0051171//regulation of nitrogen compound metabolic process	gi|356553299|ref|XP_003544994.1|/2.55184e-97/PREDICTED: probable calcium-binding protein CML18 [Glycine max]
Glyma.15G003300	-	-	-	-	-	-	-	-	-3.0234	down	6.86874e-05	0.0043438	-	-	-	-	-	-	-	-	1619	ko04626//Plant-pathogen interaction	-	GO:0001071//nucleic acid binding transcription factor activity;GO:0003677//DNA binding	GO:0098542//defense response to other organism;GO:0006351//transcription, DNA-templated;GO:0010033//response to organic substance;GO:0050789//regulation of biological process	gi|947060391|gb|KRH09652.1|/0/hypothetical protein GLYMA_15G003300 [Glycine max]
Glyma.15G005100	-2.19379	down	1.92275e-05	0.000516197	-	-	-	-	-	-	-	-	-	-	-	-	-	-	-	-	1293	ko04075//Plant hormone signal transduction;ko04626//Plant-pathogen interaction	-	GO:0005515//protein binding	-	gi|947060425|gb|KRH09686.1|;gi|356558556|ref|XP_003547571.1|/0;0/hypothetical protein GLYMA_15G005100 [Glycine max];PREDICTED: transcription factor bHLH18-like [Glycine max]
Glyma.15G021300	-1.00553	down	0.000330868	0.00525602	-	-	-	-	-	-	-	-	-	-	-	-	-	-	-	-	3188	ko04626//Plant-pathogen interaction	-	GO:0004672//protein kinase activity;GO:0032550	GO:0016310//phosphorylation;GO:0006464//cellular protein modification process	gi|947060712|gb|KRH09973.1|;gi|571514932|ref|XP_006597179.1|/0;0/hypothetical protein GLYMA_15G021300 [Glycine max];PREDICTED: putative leucine-rich repeat receptor-like protein kinase At2g19210 [Glycine max]
Glyma.16G025400	1.45455	up	0.00202136	0.021184	-	-	-	-	-	-	-	-	-	-	-	-	-	-	-	-	2578	ko04626//Plant-pathogen interaction	GO:0031224//intrinsic component of membrane	GO:0005267//potassium channel activity	GO:0034220//ion transmembrane transport;GO:0051707//response to other organism;GO:0030001//metal ion transport	gi|571525040|ref|XP_006598906.1|/0/PREDICTED: putative cyclic nucleotide-gated ion channel 13 [Glycine max]
Glyma.16G031700	-1.21555	down	7.49876e-05	0.00158555	-	-	-	-	-	-	-	-	-	-	-	-	-	-	-	-	8487	ko04626//Plant-pathogen interaction	-	-	-	gi|947057171|gb|KRH06577.1|/0/hypothetical protein GLYMA_16G031700 [Glycine max]
Glyma.16G137300	-3.00275	down	1.99716e-08	1.2224e-06	-	-	-	-	-	-	-	-	-	-	-	-	-	-	-	-	3711	ko00230//Purine metabolism;ko00240//Pyrimidine metabolism;ko01100//Metabolic pathways;ko03020//RNA polymerase;ko04626//Plant-pathogen interaction	-	-	GO:0050896//response to stimulus	gi|947058822|gb|KRH08228.1|;gi|947058821|gb|KRH08227.1|/0;0/hypothetical protein GLYMA_16G137300 [Glycine max];hypothetical protein GLYMA_16G137300 [Glycine max]
Glyma.16G172100	1.36638	up	0.00572851	0.0456184	-	-	-	-	-	-	-	-	-	-	-	-	-	-	-	-	3246	ko04626//Plant-pathogen interaction	-	-	-	gi|947059346|gb|KRH08752.1|/0/hypothetical protein GLYMA_16G172100 [Glycine max]
Glyma.16G174400	-	-	-	-	2.82197	up	2.06525e-09	3.33724e-07	3.5381	up	9.27477e-06	0.000726405	2.91755	up	3.96265e-06	0.00047294	-	-	-	-	1314	ko04626//Plant-pathogen interaction	-	-	-	gi|947059385|gb|KRH08791.1|/0/hypothetical protein GLYMA_16G174400 [Glycine max]
Glyma.16G174500	-	-	-	-	2.63316	up	2.73658e-16	8.11385e-14	3.89368	up	2.35556e-13	7.26772e-11	3.43608	up	1.17599e-16	7.76627e-14	-	-	-	-	1698	ko04626//Plant-pathogen interaction	-	-	-	gi|947059386|gb|KRH08792.1|/0/hypothetical protein GLYMA_16G174500, partial [Glycine max]
Glyma.16G178800	-	-	-	-	-	-	-	-	-2.57484	down	3.90784e-08	4.68098e-06	-	-	-	-	-	-	-	-	2787	ko04141//Protein processing in endoplasmic reticulum;ko04626//Plant-pathogen interaction	-	GO:0005515//protein binding;GO:0032550	GO:0050896//response to stimulus;GO:0044267//cellular protein metabolic process	gi|571529336|ref|XP_006599549.1|/0/PREDICTED: heat shock protein 83-like [Glycine max]
Glyma.16G202400	4.13681	up	2.06738e-09	1.5668e-07	-	-	-	-	-	-	-	-	-	-	-	-	-	-	-	-	2553	ko04626//Plant-pathogen interaction	-	GO:0036094//small molecule binding;GO:0004672//protein kinase activity;GO:1901363;GO:0097159//organic cyclic compound binding;GO:0032550	GO:0006464//cellular protein modification process	gi|947059794|gb|KRH09200.1|;gi|947059792|gb|KRH09198.1|;gi|356561745|ref|XP_003549139.1|/1.83213e-162;0;0/hypothetical protein GLYMA_16G202400 [Glycine max];hypothetical protein GLYMA_16G202400 [Glycine max];PREDICTED: cysteine-rich receptor-like protein kinase 10 [Glycine max]
Glyma.16G214600	-	-	-	-	3.12897	up	1.70072e-06	0.000198425	-	-	-	-	-	-	-	-	-	-	-	-	3135	ko00230//Purine metabolism;ko00240//Pyrimidine metabolism;ko01100//Metabolic pathways;ko03020//RNA polymerase;ko04626//Plant-pathogen interaction	-	GO:0032550	GO:0050896//response to stimulus	gi|947060012|gb|KRH09418.1|/0/hypothetical protein GLYMA_16G214600 [Glycine max]
Glyma.17G085000	-	-	-	-	-	-	-	-	-	-	-	-	1.37737	up	0.000183221	0.0114873	-	-	-	-	2698	ko04626//Plant-pathogen interaction	-	GO:0004672//protein kinase activity;GO:0032550	GO:0006464//cellular protein modification process	gi|356562682|ref|XP_003549598.1|/0/PREDICTED: L-type lectin-domain containing receptor kinase S.1-like [Glycine max]
Glyma.17G150400	-1.84861	down	0.000146339	0.00269654	-	-	-	-	-	-	-	-	-	-	-	-	-	-	-	-	882	ko04075//Plant hormone signal transduction;ko04626//Plant-pathogen interaction	-	GO:0004672//protein kinase activity;GO:0032550	GO:0006796//phosphate-containing compound metabolic process;GO:0006464//cellular protein modification process	gi|947054816|gb|KRH04269.1|/0/hypothetical protein GLYMA_17G150400 [Glycine max]
Glyma.17G150600	-1.40124	down	0.00360625	0.0324495	-	-	-	-	-	-	-	-	-	-	-	-	-	-	-	-	2166	ko04075//Plant hormone signal transduction;ko04626//Plant-pathogen interaction	-	GO:0004672//protein kinase activity;GO:0032550	GO:0006464//cellular protein modification process	gi|571536659|ref|XP_003550928.2|/0/PREDICTED: probable L-type lectin-domain containing receptor kinase S.7 [Glycine max]
Glyma.17G185300	-1.80044	down	0.00211115	0.0218132	-	-	-	-	6.25467	up	2.25539e-09	3.36053e-07	-	-	-	-	-	-	-	-	516	ko04626//Plant-pathogen interaction	-	-	-	gi|947055314|gb|KRH04767.1|/1.54976e-111/hypothetical protein GLYMA_17G185300 [Glycine max]
Glyma.17G187200	-1.02924	down	4.88161e-05	0.00111464	-	-	-	-	-	-	-	-	-	-	-	-	-	-	-	-	2779	ko04075//Plant hormone signal transduction;ko04626//Plant-pathogen interaction	-	GO:0016301//kinase activity;GO:0032550	GO:0006796//phosphate-containing compound metabolic process;GO:0006464//cellular protein modification process	gi|955377781|ref|XP_014624839.1|/0/PREDICTED: probable inactive leucine-rich repeat receptor-like protein kinase At3g03770 [Glycine max]
Glyma.18G026900	-12.3404	down	2.0806e-46	4.12754e-43	-9.97699	down	4.87861e-37	1.31389e-33	-10.5771	down	9.89397e-09	1.34916e-06	-3.35916	down	0.00107415	0.042113	-	-	-	-	1413	ko04626//Plant-pathogen interaction	-	GO:0016772//transferase activity, transferring phosphorus-containing groups	-	gi|955382928|ref|XP_003552842.3|/0/PREDICTED: putative serine/threonine-protein kinase-like protein CCR3 [Glycine max]
Glyma.18G076200	1.01857	up	0.00170076	0.0185625	-	-	-	-	-	-	-	-	-	-	-	-	-	-	-	-	1764	ko04075//Plant hormone signal transduction;ko04626//Plant-pathogen interaction	-	GO:0004672//protein kinase activity;GO:0032550	GO:0006796//phosphate-containing compound metabolic process;GO:0006464//cellular protein modification process	gi|947048945|gb|KRG98473.1|/0/hypothetical protein GLYMA_18G076200 [Glycine max]
Glyma.18G091800	-	-	-	-	-2.34812	down	0.000322463	0.0232101	-	-	-	-	-2.8488	down	0.000282489	0.0159905	-	-	-	-	2859	ko04626//Plant-pathogen interaction	-	-	-	gi|947049105|gb|KRG98633.1|/5.16573e-129/hypothetical protein GLYMA_18G086300 [Glycine max]
Glyma.18G204500	-	-	-	-	-	-	-	-	5.03732	up	7.38541e-27	1.25326e-23	6.40279	up	6.09239e-28	1.39272e-24	-	-	-	-	3138	ko04626//Plant-pathogen interaction	-	-	-	gi|947050770|gb|KRH00299.1|/0/hypothetical protein GLYMA_18G204500 [Glycine max]
Glyma.18G219800	-2.62562	down	6.49418e-11	6.71829e-09	-	-	-	-	-	-	-	-	3.43879	up	9.84737e-05	0.00715511	-	-	-	-	2944	ko04626//Plant-pathogen interaction	-	GO:0016301//kinase activity;GO:0036094//small molecule binding;GO:0004672//protein kinase activity;GO:1901363;GO:0097159//organic cyclic compound binding	GO:0044237//cellular metabolic process	gi|571548055|ref|XP_006602745.1|;gi|947051019|gb|KRH00548.1|/0;0/PREDICTED: cysteine-rich receptor-like protein kinase 7 isoform X1 [Glycine max];hypothetical protein GLYMA_18G219800 [Glycine max]
Glyma.18G221400	-	-	-	-	-	-	-	-	2.33321	up	0.000768554	0.0316784	-	-	-	-	-	-	-	-	2001	ko04626//Plant-pathogen interaction	GO:0043231//intracellular membrane-bounded organelle	GO:0005085//guanyl-nucleotide exchange factor activity	GO:0033124;GO:0009553//embryo sac development;GO:0032011//ARF protein signal transduction	gi|947051053|gb|KRH00582.1|/1.48183e-178/hypothetical protein GLYMA_18G221400 [Glycine max]
Glyma.18G226300	-6.91157	down	4.87326e-32	5.66727e-29	-	-	-	-	-	-	-	-	-6.33609	down	2.08907e-13	8.16882e-11	-	-	-	-	9435	ko04626//Plant-pathogen interaction	-	-	-	gi|947051119|gb|KRH00648.1|/0/hypothetical protein GLYMA_18G226300 [Glycine max]
Glyma.18G226500	-10.4493	down	1.12692e-25	7.75621e-23	-	-	-	-	-8.36363	down	1.56385e-06	0.000150257	-7.74697	down	3.75068e-13	1.41722e-10	-	-	-	-	10583	ko04626//Plant-pathogen interaction	-	GO:0036094//small molecule binding;GO:0097159//organic cyclic compound binding;GO:1901363	-	gi|947051121|gb|KRH00650.1|/0/hypothetical protein GLYMA_18G226500 [Glycine max]
Glyma.18G226800	-6.91246	down	2.42687e-45	4.54702e-42	-	-	-	-	-4.31104	down	1.55305e-07	1.71256e-05	-4.36033	down	2.88467e-12	9.42052e-10	-	-	-	-	6246	ko04626//Plant-pathogen interaction	-	GO:0036094//small molecule binding;GO:0097159//organic cyclic compound binding;GO:1901363	-	gi|947051124|gb|KRH00653.1|/0/hypothetical protein GLYMA_18G226800 [Glycine max]
Glyma.18G226900	-9.0754	down	1.97841e-16	4.4629e-14	-	-	-	-	-	-	-	-	-	-	-	-	-	-	-	-	4664	ko04626//Plant-pathogen interaction	-	-	-	gi|947051125|gb|KRH00654.1|/0/hypothetical protein GLYMA_18G226900 [Glycine max]
Glyma.18G270800	-	-	-	-	-	-	-	-	3.77425	up	7.89823e-08	9.17306e-06	-	-	-	-	-	-	-	-	2730	ko04626//Plant-pathogen interaction	-	GO:0004672//protein kinase activity	GO:0006796//phosphate-containing compound metabolic process	gi|947051816|gb|KRH01345.1|/0/hypothetical protein GLYMA_18G270800 [Glycine max]
Glyma.18G281700	1.61515	up	0.00244083	0.0243829	-	-	-	-	-	-	-	-	-	-	-	-	-	-	-	-	4047	ko04626//Plant-pathogen interaction	-	-	-	gi|571549792|ref|XP_003551801.2|/0/PREDICTED: probable disease resistance protein At4g27220 [Glycine max]
Glyma.18G287000	-	-	-	-	-2.34846	down	5.02168e-05	0.00450807	-	-	-	-	-	-	-	-	-	-	-	-	3158	ko04626//Plant-pathogen interaction	-	-	-	gi|571549977|ref|XP_006603027.1|/0/PREDICTED: disease resistance protein RPP13-like [Glycine max]
Glyma.20G034200	6.78477	up	1.36487e-25	9.20607e-23	-	-	-	-	-	-	-	-	-	-	-	-	-	-	-	-	828	ko04626//Plant-pathogen interaction	-	-	-	gi|947039863|gb|KRG89587.1|;gi|734395097|gb|KHN28802.1|/2.21565e-122;3.13952e-127/hypothetical protein GLYMA_20G034200 [Glycine max];Putative calcium-binding protein CML45 [Glycine soja]
Glyma.20G132400	-	-	-	-	-	-	-	-	-1.03675	down	0.000922503	0.0365116	-	-	-	-	-	-	-	-	1141	ko04075//Plant hormone signal transduction;ko04626//Plant-pathogen interaction	-	GO:0016772//transferase activity, transferring phosphorus-containing groups	GO:0006796//phosphate-containing compound metabolic process	gi|955390929|ref|XP_014627745.1|/1.80076e-124/PREDICTED: somatic embryogenesis receptor kinase 1-like isoform X1 [Glycine max]
Glyma.U008900	-1.49942	down	0.000506817	0.00743471	-	-	-	-	-	-	-	-	-	-	-	-	-	-	-	-	2589	ko04626//Plant-pathogen interaction	-	-	-	gi|947038196|gb|KRG88521.1|/0/hypothetical protein GLYMA_U008900 [Glycine max]
Glyma.U008800	5.37147	up	1.07151e-22	5.73595e-20	5.18968	up	1.69262e-24	1.03211e-21	-	-	-	-	-	-	-	-	10.5015	up	1.99631e-10	5.47468e-08	1738	ko04626//Plant-pathogen interaction	-	-	-	gi|947038195|gb|KRG88520.1|/0/hypothetical protein GLYMA_U008800 [Glycine max]
Glyma.06G125600	-	-	-	-	-	-	-	-	-	-	-	-	-	-	-	-	7.82888	up	9.4202e-06	0.00033314	1743	ko04626//Plant-pathogen interaction	-	GO:0003677//DNA binding;GO:0001071//nucleic acid binding transcription factor activity	GO:0006351//transcription, DNA-templated	gi|959092742|ref|NP_001304644.1|/0/probable WRKY transcription factor 53 [Glycine max]
Glyma.10G002200	-	-	-	-	-	-	-	-	-	-	-	-	-	-	-	-	7.59311	up	8.49899e-05	0.00166609	1062	ko04626//Plant-pathogen interaction	-	GO:0046872//metal ion binding	GO:0019932//second-messenger-mediated signaling	gi|351727589|ref|NP_001236910.1|/1.00985e-102/uncharacterized protein LOC100526987 [Glycine max]
Glyma.16G137600	3.06089	up	4.25544e-05	0.000996631	2.32125	up	3.35776e-06	0.000380759	-	-	-	-	3.371	up	2.25875e-06	0.000285641	6.77516	up	1.60068e-16	1.63046e-13	3555	ko00230//Purine metabolism;ko00240//Pyrimidine metabolism;ko01100//Metabolic pathways;ko03020//RNA polymerase;ko04626//Plant-pathogen interaction	-	-	GO:0050896//response to stimulus	gi|955374830|ref|XP_003548883.2|/0/PREDICTED: TMV resistance protein N-like [Glycine max]
Glyma.16G026400	-	-	-	-	-	-	-	-	-	-	-	-	-	-	-	-	5.61978	up	6.51431e-11	2.1113e-08	1825	ko04626//Plant-pathogen interaction	-	GO:0003677//DNA binding;GO:0001071//nucleic acid binding transcription factor activity	GO:0006351//transcription, DNA-templated	gi|918463837|gb|ALA09263.1|/0/WRKY transcription factor, partial [Glycine max]
Glyma.09G005700	-	-	-	-	-	-	-	-	-	-	-	-	-	-	-	-	5.51639	up	5.20341e-08	6.23556e-06	1942	ko04626//Plant-pathogen interaction	-	-	-	gi|356532095|ref|XP_003534609.1|/0/PREDICTED: probable WRKY transcription factor 31 [Glycine max]
Glyma.20G137900	-	-	-	-	-	-	-	-	-	-	-	-	-	-	-	-	5.32995	up	1.07225e-05	0.000367128	2338	ko04626//Plant-pathogen interaction	-	GO:0016301//kinase activity;GO:0004672//protein kinase activity	-	gi|356575757|ref|XP_003556003.1|;gi|947041445|gb|KRG91169.1|/0;0/PREDICTED: putative receptor-like protein kinase At4g00960 [Glycine max];hypothetical protein GLYMA_20G137900 [Glycine max]
Glyma.09G099900	-	-	-	-	-	-	-	-	-	-	-	-	-	-	-	-	4.98321	up	1.3276e-11	5.73703e-09	3235	ko04075//Plant hormone signal transduction;ko04626//Plant-pathogen interaction	-	GO:0004672//protein kinase activity;GO:0032550	GO:0006464//cellular protein modification process	gi|955340766|ref|XP_006587157.2|;gi|955340768|ref|XP_014617538.1|/0;0/PREDICTED: probable LRR receptor-like serine/threonine-protein kinase At1g56130 isoform X1 [Glycine max];PREDICTED: probable LRR receptor-like serine/threonine-protein kinase At1g56130 isoform X2 [Glycine max]
Glyma.12G011700	-	-	-	-	-	-	-	-	-	-	-	-	-	-	-	-	4.85284	up	5.66714e-12	2.64971e-09	3539	ko04626//Plant-pathogen interaction	-	-	-	gi|571491619|ref|XP_006591996.1|/0/PREDICTED: disease resistance protein RPP13-like [Glycine max]
Glyma.03G054900	-	-	-	-	-	-	-	-	-	-	-	-	-	-	-	-	4.77784	up	1.79504e-06	9.4633e-05	3248	ko04626//Plant-pathogen interaction	-	GO:0004672//protein kinase activity;GO:0032550	GO:0006796//phosphate-containing compound metabolic process;GO:0006464//cellular protein modification process;GO:0008037//cell recognition	gi|571444460|ref|XP_006576519.1|;gi|571444463|ref|XP_006576520.1|/0;0/PREDICTED: G-type lectin S-receptor-like serine/threonine-protein kinase At4g27290 isoform X1 [Glycine max];PREDICTED: G-type lectin S-receptor-like serine/threonine-protein kinase At4g27290 isoform X3 [Glycine max]
Glyma.16G137200	1.91235	up	0.000121154	0.00232287	-	-	-	-	-	-	-	-	-	-	-	-	4.77561	up	7.65878e-06	0.000283683	1648	ko04626//Plant-pathogen interaction	-	-	-	gi|955374835|ref|XP_003547976.2|/0/PREDICTED: TMV resistance protein N [Glycine max]
Glyma.11G163300	-	-	-	-	-	-	-	-	-	-	-	-	-	-	-	-	4.73518	up	0.00100086	0.00950565	2355	ko04626//Plant-pathogen interaction	-	-	-	gi|356539680|ref|XP_003538323.1|/0/PREDICTED: probable WRKY transcription factor 25 [Glycine max]
Glyma.07G078000	-	-	-	-	-	-	-	-	-	-	-	-	-	-	-	-	4.40047	up	0.000153201	0.00254927	3561	ko04626//Plant-pathogen interaction	-	GO:0036094//small molecule binding;GO:0097159//organic cyclic compound binding;GO:1901363	-	gi|955328410|ref|XP_014632873.1|/0/PREDICTED: disease resistance protein RPS2-like [Glycine max]
Glyma.04G078400	-	-	-	-	-	-	-	-	-	-	-	-	-	-	-	-	4.29879	up	1.94651e-05	0.000576494	955	ko04626//Plant-pathogen interaction	-	GO:0046872//metal ion binding	-	gi|351721210|ref|NP_001236178.1|/6.40392e-110/uncharacterized protein LOC100527700 [Glycine max]
Glyma.15G110300	-	-	-	-	-	-	-	-	-	-	-	-	-	-	-	-	4.29237	up	0.000103553	0.0019203	2099	ko04626//Plant-pathogen interaction	-	-	-	gi|356555684|ref|XP_003546160.1|/0/PREDICTED: probable WRKY transcription factor 31 [Glycine max]
Glyma.13G266100	-	-	-	-	-	-	-	-	-	-	-	-	-	-	-	-	4.22161	up	6.33191e-05	0.00133512	3569	ko04626//Plant-pathogen interaction	-	GO:0004672//protein kinase activity;GO:0032550	GO:0006796//phosphate-containing compound metabolic process;GO:0006464//cellular protein modification process	gi|734413477|gb|KHN36922.1|/0/Putative leucine-rich repeat receptor-like serine/threonine-protein kinase [Glycine soja]
Glyma.13G303900	-	-	-	-	-	-	-	-	-	-	-	-	-	-	-	-	4.15709	up	3.45515e-05	0.000880645	965	ko04626//Plant-pathogen interaction	-	-	-	gi|356547045|ref|XP_003541928.1|/1.29939e-69/PREDICTED: calcium-binding protein PBP1-like [Glycine max]
Glyma.08G229100	-	-	-	-	1.83596	up	1.9266e-10	3.47843e-08	2.12347	up	5.74473e-11	1.12483e-08	-	-	-	-	4.08162	up	2.22899e-14	1.81637e-11	3020	ko04626//Plant-pathogen interaction	-	GO:0016301//kinase activity;GO:0032550	GO:0006464//cellular protein modification process	gi|571472730|ref|XP_006585700.1|/0/PREDICTED: probable inactive leucine-rich repeat receptor-like protein kinase At3g03770 [Glycine max]
Glyma.07G001400	2.29703	up	1.06875e-05	0.000317005	3.38976	up	2.06948e-11	4.12848e-09	3.1603	up	9.53596e-10	1.5092e-07	3.1691	up	4.00379e-05	0.00338025	4.06632	up	5.32076e-06	0.00021817	2996	ko04626//Plant-pathogen interaction	-	GO:0016772//transferase activity, transferring phosphorus-containing groups	-	gi|571464153|ref|XP_006582973.1|/0/PREDICTED: U-box domain-containing protein 35-like isoform X1 [Glycine max]
Glyma.18G141500	-1.36151	down	0.000655137	0.00909987	-	-	-	-	-	-	-	-	-	-	-	-	4.055	up	1.76882e-06	9.37706e-05	2617	ko04075//Plant hormone signal transduction;ko04626//Plant-pathogen interaction	GO:0005911//cell-cell junction;GO:0016020//membrane	GO:0004672//protein kinase activity;GO:0032550	GO:0006468//protein phosphorylation;GO:0000302//response to reactive oxygen species	gi|571545655|ref|XP_003551216.2|/0/PREDICTED: cysteine-rich receptor-like protein kinase 2 [Glycine max]
Glyma.01G204400	-	-	-	-	-	-	-	-	-	-	-	-	-	-	-	-	4.0261	up	3.68886e-05	0.000921278	1572	ko04075//Plant hormone signal transduction;ko04626//Plant-pathogen interaction	-	-	-	gi|734424424|gb|KHN42652.1|;gi|947129438|gb|KRH77292.1|/7.232e-138;1.9617e-107/Protein TIFY 10B [Glycine soja];hypothetical protein GLYMA_01G204400 [Glycine max]
Glyma.07G127100	-	-	-	-	-	-	-	-	-	-	-	-	-	-	-	-	4.01405	up	1.43133e-05	0.000456235	3329	ko04626//Plant-pathogen interaction	-	GO:0004672//protein kinase activity;GO:0032550	GO:0006796//phosphate-containing compound metabolic process;GO:0006464//cellular protein modification process	gi|571463975|ref|XP_006582888.1|;gi|955328256|ref|XP_014632820.1|/0;0/PREDICTED: probable LRR receptor-like serine/threonine-protein kinase At4g29180-like isoform X1 [Glycine max];PREDICTED: probable LRR receptor-like serine/threonine-protein kinase At4g29180-like isoform X2 [Glycine max]
Glyma.09G182200	-	-	-	-	-	-	-	-	-	-	-	-	-	-	-	-	3.98403	up	6.4752e-05	0.00136028	1785	ko04075//Plant hormone signal transduction;ko04626//Plant-pathogen interaction	-	GO:0016301//kinase activity	-	gi|947090495|gb|KRH39160.1|/0/hypothetical protein GLYMA_09G182200 [Glycine max]
Glyma.08G142400	1.38593	up	0.00456598	0.0384726	-	-	-	-	-	-	-	-	-	-	-	-	3.90859	up	1.61235e-14	1.35252e-11	1059	ko04626//Plant-pathogen interaction	-	GO:0001071//nucleic acid binding transcription factor activity;GO:0003677//DNA binding	GO:0050896//response to stimulus;GO:0006351//transcription, DNA-templated	gi|255639287|gb|ACU19941.1|/1.44336e-110/unknown [Glycine max]
Glyma.05G215900	-	-	-	-	-	-	-	-	-	-	-	-	-	-	-	-	3.90576	up	0.000180463	0.0028706	1807	ko04626//Plant-pathogen interaction	-	GO:0003677//DNA binding;GO:0001071//nucleic acid binding transcription factor activity	GO:0006351//transcription, DNA-templated	gi|356513295|ref|XP_003525349.1|/0/PREDICTED: probable WRKY transcription factor 41 [Glycine max]
Glyma.08G235900	-	-	-	-	-	-	-	-	-	-	-	-	-	-	-	-	3.84501	up	0.00737639	0.0387159	3545	ko04075//Plant hormone signal transduction;ko04626//Plant-pathogen interaction	-	GO:0004672//protein kinase activity;GO:0032550	GO:0006464//cellular protein modification process	gi|356526421|ref|XP_003531816.1|/0/PREDICTED: probable LRR receptor-like serine/threonine-protein kinase At1g56130 isoform X1 [Glycine max]
Glyma.03G047700	-	-	-	-	-	-	-	-	-	-	-	-	-	-	-	-	3.78387	up	8.10635e-05	0.00160933	2490	ko04626//Plant-pathogen interaction	-	-	GO:0050896//response to stimulus	gi|947117339|gb|KRH65588.1|/0/hypothetical protein GLYMA_03G047700, partial [Glycine max]
Glyma.11G075200	-	-	-	-	-	-	-	-	-	-	-	-	-	-	-	-	3.70245	up	2.5336e-05	0.000696659	4641	ko04626//Plant-pathogen interaction	GO:0031224//intrinsic component of membrane	GO:0004672//protein kinase activity;GO:0032550	GO:0006796//phosphate-containing compound metabolic process;GO:0006464//cellular protein modification process	gi|955349679|ref|XP_014619378.1|/0/PREDICTED: probable LRR receptor-like serine/threonine-protein kinase At4g36180 [Glycine max]
Glyma.16G127900	-	-	-	-	-	-	-	-	-	-	-	-	-	-	-	-	3.69577	up	4.64421e-08	5.63649e-06	7518	ko00230//Purine metabolism;ko00240//Pyrimidine metabolism;ko01100//Metabolic pathways;ko03020//RNA polymerase;ko04626//Plant-pathogen interaction	-	GO:0032550	GO:0050896//response to stimulus	gi|947058663|gb|KRH08069.1|;gi|947058664|gb|KRH08070.1|;gi|947058662|gb|KRH08068.1|/0;0;0/hypothetical protein GLYMA_16G127900 [Glycine max];hypothetical protein GLYMA_16G127900 [Glycine max];hypothetical protein GLYMA_16G127900 [Glycine max]
Glyma.01G117900	-	-	-	-	-	-	-	-	-	-	-	-	-	-	-	-	3.67399	up	0.000355062	0.00460515	4216	ko04075//Plant hormone signal transduction;ko04626//Plant-pathogen interaction	-	GO:0004672//protein kinase activity;GO:0032550	GO:0006796//phosphate-containing compound metabolic process;GO:0006464//cellular protein modification process;GO:0008037//cell recognition	gi|571435020|ref|XP_006573359.1|;gi|947128048|gb|KRH75902.1|;gi|571435014|ref|XP_006573356.1|;gi|947128051|gb|KRH75905.1|;gi|947128060|gb|KRH75914.1|/0;0;0;0;0/PREDICTED: G-type lectin S-receptor-like serine/threonine-protein kinase At4g27290 isoform X2 [Glycine max];hypothetical protein GLYMA_01G117900 [Glycine max];PREDICTED: G-type lectin S-receptor-like serine/threonine-protein kinase At4g272…
Glyma.07G023300	-	-	-	-	-	-	-	-	-4.08662	down	0.000417792	0.019724	-	-	-	-	3.67244	up	0.000387641	0.0048683	1692	ko04626//Plant-pathogen interaction	-	-	GO:0098542//defense response to other organism;GO:0010033//response to organic substance;GO:0050789//regulation of biological process;GO:0009987//cellular process	gi|918463825|gb|ALA09257.1|/8.85387e-180/WRKY transcription factor, partial [Glycine max]
Glyma.18G281600	-	-	-	-	-	-	-	-	-	-	-	-	-	-	-	-	3.67154	up	0.000156854	0.0025889	3793	ko04626//Plant-pathogen interaction	-	-	-	gi|947051977|gb|KRH01506.1|/0/hypothetical protein GLYMA_18G2816002, partial [Glycine max]
Glyma.05G119500	-	-	-	-	-	-	-	-	-3.34141	down	0.000152444	0.00859114	-	-	-	-	3.57315	up	0.000204728	0.00313078	2761	ko04075//Plant hormone signal transduction;ko04626//Plant-pathogen interaction	GO:0032991//macromolecular complex;GO:0043231//intracellular membrane-bounded organelle;GO:0031224//intrinsic component of membrane	GO:0005102//receptor binding;GO:0032550;GO:0004672//protein kinase activity;GO:0046983//protein dimerization activity	GO:0006984//ER-nucleus signaling pathway;GO:0009620//response to fungus;GO:0040007//growth;GO:0010260//organ senescence;GO:0002239//response to oomycetes;GO:0009617//response to bacterium;GO:0006605//protein targeting;GO:0048580;GO:0006796//phosphate-containing compound metabolic process;GO:0010243//response to organonitrogen compound;GO:0002252;GO:0043401//steroid hormone mediated signaling path…	gi|356510695|ref|XP_003524071.1|/0/PREDICTED: BRASSINOSTEROID INSENSITIVE 1-associated receptor kinase 1-like [Glycine max]
Glyma.08G044400	-	-	-	-	-	-	-	-	-	-	-	-	-	-	-	-	3.54849	up	5.37272e-05	0.00118879	2095	ko04070//Phosphatidylinositol signaling system;ko04626//Plant-pathogen interaction	GO:0043231//intracellular membrane-bounded organelle	GO:0001071//nucleic acid binding transcription factor activity;GO:0003677//DNA binding	GO:0002831;GO:0010337//regulation of salicylic acid metabolic process;GO:0006351//transcription, DNA-templated	gi|947093104|gb|KRH41689.1|;gi|356524378|ref|XP_003530806.1|/0;0/hypothetical protein GLYMA_08G044400 [Glycine max];PREDICTED: protein SAR DEFICIENT 1 [Glycine max]
Glyma.06G265000	-	-	-	-	-	-	-	-	-	-	-	-	-	-	-	-	3.47598	up	0.000511118	0.00589947	3933	ko04626//Plant-pathogen interaction	-	-	-	gi|955326975|ref|XP_014632562.1|/0/PREDICTED: disease resistance protein TAO1-like [Glycine max]
Glyma.13G181400	-	-	-	-	-	-	-	-	-	-	-	-	-	-	-	-	3.38634	up	5.11517e-07	3.66557e-05	1719	ko04626//Plant-pathogen interaction	-	GO:0004672//protein kinase activity;GO:0032550	GO:0006464//cellular protein modification process	gi|571498823|ref|XP_006594324.1|/0/PREDICTED: putative serine/threonine-protein kinase [Glycine max]
Glyma.09G274000	-	-	-	-	-	-	-	-	-	-	-	-	-	-	-	-	3.33606	up	0.00369041	0.0238726	1194	ko04626//Plant-pathogen interaction	-	GO:0003677//DNA binding;GO:0001071//nucleic acid binding transcription factor activity	GO:0006351//transcription, DNA-templated	gi|937500778|ref|NP_001302438.1|/0/probable WRKY transcription factor 70-like [Glycine max]
Glyma.10G178400	-	-	-	-	-	-	-	-	-	-	-	-	-	-	-	-	3.24413	up	0.000161919	0.00264648	1548	ko04626//Plant-pathogen interaction	-	GO:0046872//metal ion binding	GO:0019932//second-messenger-mediated signaling	gi|351726666|ref|NP_001237902.1|/1.76727e-103/calmodulin [Glycine max]
Glyma.08G039400	-	-	-	-	-	-	-	-	-	-	-	-	-	-	-	-	3.21692	up	0.000301302	0.00413147	2865	ko04626//Plant-pathogen interaction	-	-	-	gi|356527793|ref|XP_003532491.1|/0/PREDICTED: leucine-rich repeat extensin-like protein 4 [Glycine max]
Glyma.06G255900	-	-	-	-	-	-	-	-	-	-	-	-	-	-	-	-	3.19763	up	0.00047135	0.00555741	2845	ko04626//Plant-pathogen interaction	-	GO:0036094//small molecule binding;GO:0004672//protein kinase activity;GO:1901363;GO:0097159//organic cyclic compound binding	GO:0006796//phosphate-containing compound metabolic process	gi|356514857|ref|XP_003526119.1|/0/PREDICTED: G-type lectin S-receptor-like serine/threonine-protein kinase At1g11300 [Glycine max]
Glyma.03G046500	-1.44831	down	0.000234256	0.003968	-	-	-	-	1.29715	up	0.00065108	0.0277755	-	-	-	-	3.19249	up	9.49634e-05	0.00180563	3498	ko00230//Purine metabolism;ko00240//Pyrimidine metabolism;ko01100//Metabolic pathways;ko03020//RNA polymerase;ko04626//Plant-pathogen interaction	-	-	-	gi|955310888|ref|XP_006577442.2|/0/PREDICTED: putative disease resistance RPP13-like protein 1 [Glycine max]
Glyma.05G237200	2.50182	up	0.000158688	0.00288038	-	-	-	-	-	-	-	-	-	-	-	-	3.17974	up	0.00136527	0.0118056	2018	ko04070//Phosphatidylinositol signaling system;ko04626//Plant-pathogen interaction	GO:0043231//intracellular membrane-bounded organelle	GO:0001071//nucleic acid binding transcription factor activity;GO:0003677//DNA binding	GO:0002831;GO:0010337//regulation of salicylic acid metabolic process;GO:0006351//transcription, DNA-templated	gi|356513070|ref|XP_003525237.1|/0/PREDICTED: protein SAR DEFICIENT 1-like [Glycine max]
Glyma.12G103600	-	-	-	-	-	-	-	-	-	-	-	-	-	-	-	-	3.16545	up	2.50379e-05	0.000691963	1075	ko04070//Phosphatidylinositol signaling system;ko04626//Plant-pathogen interaction	-	GO:0046872//metal ion binding	-	gi|734380494|gb|KHN22869.1|/4.28219e-76/Calcium-binding protein PBP1 [Glycine soja]
Glyma.11G157200	-	-	-	-	-	-	-	-	-	-	-	-	-	-	-	-	3.15232	up	0.00203184	0.0156452	816	ko04626//Plant-pathogen interaction	-	GO:0046872//metal ion binding	-	gi|947081295|gb|KRH30084.1|/4.03735e-97/hypothetical protein GLYMA_11G157200 [Glycine max]
Glyma.02G232600	-	-	-	-	-	-	-	-	-	-	-	-	-	-	-	-	3.13126	up	2.65932e-06	0.000126411	2179	ko04626//Plant-pathogen interaction	-	-	-	gi|356500910|ref|XP_003519273.1|/0/PREDICTED: probable WRKY transcription factor 25 [Glycine max]
Glyma.14G199800	-1.3358	down	0.00105573	0.0130946	-	-	-	-	-	-	-	-	-	-	-	-	3.12085	up	0.001188	0.0107216	1328	ko04626//Plant-pathogen interaction	-	-	GO:0009987//cellular process	gi|571511635|ref|XP_006596452.1|/0/PREDICTED: uncharacterized protein LOC102667674 [Glycine max]
Glyma.14G200200	-	-	-	-	-	-	-	-	-3.83305	down	0.000152329	0.00859114	-	-	-	-	3.11345	up	0.000807835	0.008179	2778	ko04626//Plant-pathogen interaction	-	GO:0003677//DNA binding;GO:0001071//nucleic acid binding transcription factor activity	GO:0006351//transcription, DNA-templated	gi|356553124|ref|XP_003544908.1|;gi|947067983|gb|KRH17126.1|/0;0/PREDICTED: probable WRKY transcription factor 25 [Glycine max];hypothetical protein GLYMA_14G200200 [Glycine max]
Glyma.19G229400	-	-	-	-	-	-	-	-	-	-	-	-	-	-	-	-	3.09356	up	0.000742215	0.00771454	2279	ko04070//Phosphatidylinositol signaling system;ko04626//Plant-pathogen interaction	-	-	-	gi|571559977|ref|XP_006604792.1|/0/PREDICTED: calmodulin-binding protein 60 D isoform X1 [Glycine max]
Glyma.02G150600	-	-	-	-	-	-	-	-	-	-	-	-	-	-	-	-	3.0682	up	0.00046357	0.00550137	2237	ko04075//Plant hormone signal transduction;ko04626//Plant-pathogen interaction	-	GO:0004672//protein kinase activity;GO:0032550	GO:0006464//cellular protein modification process	gi|356502836|ref|XP_003520221.1|/0/PREDICTED: probable LRR receptor-like serine/threonine-protein kinase RKF3 [Glycine max]
Glyma.10G113300	-	-	-	-	-	-	-	-	-	-	-	-	-	-	-	-	3.06199	up	0.000774216	0.00793724	708	ko04626//Plant-pathogen interaction	GO:0005622//intracellular	GO:0097159//organic cyclic compound binding;GO:1901363	GO:0071704//organic substance metabolic process;GO:0044238//primary metabolic process;GO:0044237//cellular metabolic process	gi|356537413|ref|XP_003537222.1|/5.59253e-109/PREDICTED: elongation factor Tu, chloroplastic-like [Glycine max]
Glyma.08G021900	-	-	-	-	-	-	-	-	-	-	-	-	-	-	-	-	3.05728	up	0.00350136	0.0230363	1990	ko04626//Plant-pathogen interaction	-	GO:0003677//DNA binding;GO:0001071//nucleic acid binding transcription factor activity	GO:0006351//transcription, DNA-templated	gi|918463829|gb|ALA09259.1|/0/WRKY transcription factor [Glycine max]
Glyma.06G142000	-	-	-	-	-	-	-	-	-	-	-	-	-	-	-	-	3.05627	up	0.0020696	0.0158632	1605	ko04626//Plant-pathogen interaction	-	GO:0003677//DNA binding;GO:0001071//nucleic acid binding transcription factor activity	GO:0006351//transcription, DNA-templated	gi|356516231|ref|XP_003526799.1|/0/PREDICTED: probable WRKY transcription factor 70 [Glycine max]
Glyma.11G043700	-	-	-	-	-	-	-	-	-	-	-	-	-	-	-	-	3.01001	up	0.00418144	0.026159	1758	ko04075//Plant hormone signal transduction;ko04626//Plant-pathogen interaction	-	-	-	gi|356540613|ref|XP_003538782.1|/0/PREDICTED: transcription factor bHLH25-like [Glycine max]
Glyma.20G169000	-	-	-	-	-	-	-	-	-	-	-	-	-	-	-	-	2.9442	up	1.52515e-07	1.46886e-05	2125	ko04075//Plant hormone signal transduction;ko04626//Plant-pathogen interaction	-	GO:0004672//protein kinase activity;GO:0032550	GO:0016310//phosphorylation;GO:0006464//cellular protein modification process	gi|351723997|ref|NP_001238066.1|/0/serine/threonine protein kinase-like protein [Glycine max]
Glyma.18G281500	-	-	-	-	-	-	-	-	-	-	-	-	-	-	-	-	2.93243	up	0.00025959	0.00369633	4414	ko04626//Plant-pathogen interaction	-	-	-	gi|955383602|ref|XP_014626225.1|/0/PREDICTED: probable disease resistance protein At5g47250 isoform X1 [Glycine max]
Glyma.11G207500	-	-	-	-	-	-	-	-	-	-	-	-	-	-	-	-	2.90831	up	0.000679092	0.00724594	2592	ko04075//Plant hormone signal transduction;ko04626//Plant-pathogen interaction	-	GO:0004672//protein kinase activity;GO:0032550	GO:0006464//cellular protein modification process	gi|356537805|ref|XP_003537415.1|/0/PREDICTED: cysteine-rich receptor-like protein kinase 2 [Glycine max]
Glyma.05G139500	-	-	-	-	-	-	-	-	-	-	-	-	-	-	-	-	2.90743	up	0.00014693	0.00247233	1643	ko04626//Plant-pathogen interaction	-	GO:0004672//protein kinase activity;GO:0032550	GO:0006796//phosphate-containing compound metabolic process;GO:0006464//cellular protein modification process	gi|955320825|ref|XP_014631147.1|;gi|734432012|gb|KHN46091.1|/0;0/PREDICTED: cysteine-rich receptor-like protein kinase 10 isoform X2 [Glycine max];Cysteine-rich receptor-like protein kinase 10 [Glycine soja]
Glyma.15G064900	-	-	-	-	-	-	-	-	-	-	-	-	-	-	-	-	2.90364	up	0.00227487	0.0170069	2760	ko04626//Plant-pathogen interaction	-	GO:0004672//protein kinase activity;GO:0032550	GO:0006796//phosphate-containing compound metabolic process;GO:0006464//cellular protein modification process;GO:0008037//cell recognition	gi|955366151|ref|XP_006597385.2|/0/PREDICTED: G-type lectin S-receptor-like serine/threonine-protein kinase At4g27290 isoform X2 [Glycine max]
Glyma.13G316100	-	-	-	-	-	-	-	-	-	-	-	-	-	-	-	-	2.88609	up	0.00169672	0.0137355	1153	ko04626//Plant-pathogen interaction	-	GO:0046872//metal ion binding	-	gi|947073780|gb|KRH22671.1|;gi|947073781|gb|KRH22672.1|/7.33047e-134;3.22811e-132/hypothetical protein GLYMA_13G316100 [Glycine max];hypothetical protein GLYMA_13G316100 [Glycine max]
Glyma.02G100300	-	-	-	-	-	-	-	-	-	-	-	-	-	-	-	-	2.85311	up	0.00188294	0.0148557	2319	ko04626//Plant-pathogen interaction	-	GO:0001871;GO:0004672//protein kinase activity;GO:0032550	GO:0006796//phosphate-containing compound metabolic process;GO:0006464//cellular protein modification process	gi|351725961|ref|NP_001238646.1|/0/stress-induced receptor-like kinase precursor [Glycine max]
Glyma.17G062300	-	-	-	-	-	-	-	-	-	-	-	-	-	-	-	-	2.82178	up	0.00159882	0.0131584	1829	ko04626//Plant-pathogen interaction	-	GO:0004672//protein kinase activity;GO:0032550	GO:0006796//phosphate-containing compound metabolic process;GO:0006464//cellular protein modification process	gi|947053400|gb|KRH02853.1|;gi|947053399|gb|KRH02852.1|;gi|351724607|ref|NP_001238599.1|/0;0;0/hypothetical protein GLYMA_17G062300 [Glycine max];hypothetical protein GLYMA_17G062300 [Glycine max];protein kinase family protein [Glycine max]
Glyma.01G118300	-1.32463	down	0.000512679	0.00750205	-	-	-	-	-	-	-	-	-	-	-	-	2.81805	up	0.00140281	0.0120293	1776	ko04626//Plant-pathogen interaction	-	-	-	gi|947128075|gb|KRH75929.1|;gi|947128074|gb|KRH75928.1|/0;0/hypothetical protein GLYMA_01G118300 [Glycine max];hypothetical protein GLYMA_01G118300 [Glycine max]
Glyma.07G057400	-	-	-	-	-	-	-	-	-	-	-	-	-	-	-	-	2.79984	up	0.003785	0.0243245	1907	ko04626//Plant-pathogen interaction	-	GO:0003677//DNA binding;GO:0001071//nucleic acid binding transcription factor activity	GO:0006351//transcription, DNA-templated	gi|918463827|gb|ALA09258.1|/0/WRKY transcription factor [Glycine max]
Glyma.18G260700	-	-	-	-	-	-	-	-	-	-	-	-	-	-	-	-	2.7992	up	0.000678559	0.00724366	1307	ko04626//Plant-pathogen interaction	-	GO:0046872//metal ion binding	-	gi|955382091|ref|XP_014625776.1|;gi|571549120|ref|XP_006602906.1|/1.78052e-91;1.33475e-135/PREDICTED: probable calcium-binding protein CML45 isoform X2 [Glycine max];PREDICTED: probable calcium-binding protein CML45 isoform X1 [Glycine max]
Glyma.11G157100	-	-	-	-	-	-	-	-	-	-	-	-	-	-	-	-	2.79134	up	0.00455383	0.0276929	806	ko04626//Plant-pathogen interaction	-	GO:0046872//metal ion binding	-	gi|947081294|gb|KRH30083.1|/6.00745e-97/hypothetical protein GLYMA_11G157100 [Glycine max]
Glyma.09G236800	-	-	-	-	-	-	-	-	-	-	-	-	-	-	-	-	2.78314	up	0.00455234	0.0276897	1250	ko04626//Plant-pathogen interaction	-	GO:0046872//metal ion binding	-	gi|356531760|ref|XP_003534444.1|/7.58254e-149/PREDICTED: probable calcium-binding protein CML45 [Glycine max]
Glyma.18G213200	-	-	-	-	-	-	-	-	-	-	-	-	-	-	-	-	2.77615	up	0.00754375	0.0393481	1171	ko04626//Plant-pathogen interaction	-	GO:0003677//DNA binding;GO:0001071//nucleic acid binding transcription factor activity	GO:0006351//transcription, DNA-templated	gi|351725863|ref|NP_001237619.1|/0/transcription factor [Glycine max]
Glyma.12G073000	-	-	-	-	-	-	-	-	-4.38576	down	4.89106e-05	0.00319909	-	-	-	-	2.75161	up	2.02114e-06	0.000103492	2041	ko04650//Natural killer cell mediated cytotoxicity;ko04626//Plant-pathogen interaction	-	GO:0004702//receptor signaling protein serine/threonine kinase activity;GO:0032550	GO:0045682//regulation of epidermis development;GO:0051707//response to other organism;GO:0009411//response to UV;GO:0009700//indole phytoalexin biosynthetic process;GO:0010243//response to organonitrogen compound;GO:0090567;GO:0080135//regulation of cellular response to stress;GO:0000187//activation of MAPK activity	gi|356542571|ref|XP_003539740.1|/0/PREDICTED: mitogen-activated protein kinase 3 [Glycine max]
Glyma.17G096000	-	-	-	-	-	-	-	-	-	-	-	-	-	-	-	-	2.74555	up	0.000500914	0.00581938	2393	ko04626//Plant-pathogen interaction	-	GO:0046872//metal ion binding;GO:0004672//protein kinase activity;GO:0032550	GO:0006464//cellular protein modification process	gi|356565063|ref|XP_003550764.1|/0/PREDICTED: calcium-dependent protein kinase 10-like [Glycine max]
Glyma.15G043800	-	-	-	-	-	-	-	-	-	-	-	-	-	-	-	-	2.7409	up	0.000227224	0.00335785	1878	ko04626//Plant-pathogen interaction	-	GO:0004672//protein kinase activity;GO:0032550	GO:0006796//phosphate-containing compound metabolic process;GO:0006464//cellular protein modification process	gi|356557471|ref|XP_003547039.1|/0/PREDICTED: probable serine/threonine-protein kinase RLCKVII [Glycine max]
Glyma.16G172300	-	-	-	-	-	-	-	-	-	-	-	-	-	-	-	-	2.7281	up	0.0037358	0.0240843	3398	ko04626//Plant-pathogen interaction	-	-	-	gi|571529127|ref|XP_006599514.1|/0/PREDICTED: leucine-rich repeat receptor protein kinase MSL1-like [Glycine max]
Glyma.09G061900	-	-	-	-	-	-	-	-	-	-	-	-	-	-	-	-	2.71067	up	3.81081e-06	0.000168771	1572	ko04626//Plant-pathogen interaction	-	-	-	gi|947088702|gb|KRH37367.1|/1.4299e-148/hypothetical protein GLYMA_09G061900 [Glycine max]
Glyma.04G245000	-	-	-	-	-	-	-	-	-	-	-	-	-	-	-	-	2.69679	up	0.00116394	0.010542	955	ko04626//Plant-pathogen interaction	-	-	-	gi|947116302|gb|KRH64604.1|/1.88213e-99/hypothetical protein GLYMA_04G245000 [Glycine max]
Glyma.05G157000	-	-	-	-	-	-	-	-	-	-	-	-	-	-	-	-	2.69023	up	0.000924703	0.00901348	1648	ko04650//Natural killer cell mediated cytotoxicity;ko04626//Plant-pathogen interaction	-	GO:0003677//DNA binding;GO:0001071//nucleic acid binding transcription factor activity;GO:0046983//protein dimerization activity	GO:0006351//transcription, DNA-templated	gi|351727477|ref|NP_001237162.1|/8.92484e-99/bZIP transcription factor bZIP111 [Glycine max]
Glyma.17G018800	-	-	-	-	-	-	-	-	-	-	-	-	-	-	-	-	2.67929	up	3.42286e-06	0.00015398	2593	ko04650//Natural killer cell mediated cytotoxicity;ko04075//Plant hormone signal transduction;ko04626//Plant-pathogen interaction	-	GO:0004702//receptor signaling protein serine/threonine kinase activity;GO:0032550	GO:0035556//intracellular signal transduction;GO:0006796//phosphate-containing compound metabolic process;GO:0006464//cellular protein modification process	gi|947052688|gb|KRH02141.1|;gi|947052687|gb|KRH02140.1|/0;0/hypothetical protein GLYMA_17G018800 [Glycine max];hypothetical protein GLYMA_17G018800 [Glycine max]
Glyma.06G068100	-	-	-	-	-	-	-	-	-	-	-	-	-	-	-	-	2.6787	up	0.000636498	0.00696073	3397	ko04075//Plant hormone signal transduction;ko04626//Plant-pathogen interaction	-	GO:0004672//protein kinase activity;GO:0032550	GO:0006796//phosphate-containing compound metabolic process;GO:0006464//cellular protein modification process	gi|356518250|ref|XP_003527792.1|/0/PREDICTED: G-type lectin S-receptor-like serine/threonine-protein kinase SD2-5 [Glycine max]
Glyma.12G133700	-	-	-	-	-	-	-	-	-	-	-	-	-	-	-	-	2.6664	up	1.68683e-06	9.0774e-05	2444	ko04626//Plant-pathogen interaction	-	-	-	gi|356545139|ref|XP_003541002.1|/0/PREDICTED: cyclic nucleotide-gated ion channel 4-like isoform X1 [Glycine max]
Glyma.17G167600	-	-	-	-	-	-	-	-	-	-	-	-	1.08213	up	0.000557229	0.0261194	2.65017	up	0.000205494	0.00313887	2795	ko04075//Plant hormone signal transduction;ko04626//Plant-pathogen interaction	GO:0016020//membrane	GO:0016301//kinase activity	GO:0044237//cellular metabolic process	gi|356563574|ref|XP_003550036.1|/0/PREDICTED: probable LRR receptor-like serine/threonine-protein kinase At4g37250 [Glycine max]
Glyma.13G033500	-	-	-	-	-	-	-	-	-	-	-	-	-	-	-	-	2.57301	up	0.00362178	0.0235788	2293	ko04075//Plant hormone signal transduction;ko04626//Plant-pathogen interaction	-	GO:0001871;GO:0004672//protein kinase activity;GO:0032550	GO:0006796//phosphate-containing compound metabolic process;GO:0006464//cellular protein modification process	gi|955361655|ref|XP_014621916.1|;gi|571497140|ref|XP_006593813.1|/0;0/PREDICTED: probable receptor-like protein kinase At1g67000 isoform X2 [Glycine max];PREDICTED: probable receptor-like protein kinase At1g67000 isoform X1 [Glycine max]
Glyma.07G080700	-	-	-	-	-	-	-	-	-	-	-	-	-	-	-	-	2.5727	up	0.00436423	0.0269219	2840	ko04626//Plant-pathogen interaction	-	GO:0004672//protein kinase activity;GO:0032550	GO:0006796//phosphate-containing compound metabolic process;GO:0006464//cellular protein modification process;GO:0008037//cell recognition	gi|571465418|ref|XP_003529974.2|/0/PREDICTED: putative receptor protein kinase ZmPK1 [Glycine max]
Glyma.03G044000	-	-	-	-	-	-	-	-	-	-	-	-	-	-	-	-	2.56707	up	0.000402665	0.004995	3606	ko00230//Purine metabolism;ko00240//Pyrimidine metabolism;ko01100//Metabolic pathways;ko03020//RNA polymerase;ko04626//Plant-pathogen interaction	-	-	-	gi|947117295|gb|KRH65544.1|/0/hypothetical protein GLYMA_03G044000 [Glycine max]
Glyma.06G275000	-	-	-	-	-	-	-	-	-	-	-	-	-	-	-	-	2.55626	up	0.000409738	0.00505674	1599	ko04626//Plant-pathogen interaction	-	-	-	gi|947107330|gb|KRH55713.1|/0/hypothetical protein GLYMA_06G275000 [Glycine max]
Glyma.14G062100	-	-	-	-	-	-	-	-	-	-	-	-	-	-	-	-	2.5506	up	0.00265061	0.0189947	2448	ko04075//Plant hormone signal transduction;ko04626//Plant-pathogen interaction	GO:0031461//cullin-RING ubiquitin ligase complex	-	GO:0006952//defense response;GO:0001101//response to acid chemical;GO:0043161//proteasome-mediated ubiquitin-dependent protein catabolic process;GO:0009620//response to fungus;GO:0009908//flower development;GO:0009617//response to bacterium;GO:0009755//hormone-mediated signaling pathway;GO:0009639//response to red or far red light	gi|947065850|gb|KRH14993.1|;gi|947065849|gb|KRH14992.1|/0;0/hypothetical protein GLYMA_14G062100 [Glycine max];hypothetical protein GLYMA_14G062100 [Glycine max]
Glyma.07G095000	-	-	-	-	-	-	-	-	-	-	-	-	-	-	-	-	2.53735	up	0.00062414	0.00687566	2645	ko04075//Plant hormone signal transduction;ko04626//Plant-pathogen interaction	-	-	-	gi|571465619|ref|XP_006583417.1|/0/PREDICTED: probable receptor-like protein kinase At1g67000 isoform X2 [Glycine max]
Glyma.13G128200	-	-	-	-	-	-	-	-	-	-	-	-	-	-	-	-	2.53242	up	0.000810804	0.00819743	3095	ko04626//Plant-pathogen interaction	-	GO:0004672//protein kinase activity;GO:0032550	GO:0006464//cellular protein modification process	gi|947070756|gb|KRH19647.1|;gi|947070757|gb|KRH19648.1|;gi|571497907|ref|XP_003541379.2|/0;0;0/hypothetical protein GLYMA_13G128200 [Glycine max];hypothetical protein GLYMA_13G128200 [Glycine max];PREDICTED: receptor-like serine/threonine-protein kinase ALE2 isoform X2 [Glycine max]
Glyma.02G129300	-	-	-	-	-	-	-	-	-	-	-	-	-	-	-	-	2.52908	up	9.50614e-07	5.729e-05	3294	ko04626//Plant-pathogen interaction	-	GO:0004672//protein kinase activity;GO:0032550	GO:0006464//cellular protein modification process	gi|955307115|ref|XP_014622348.1|/0/PREDICTED: proline-rich receptor-like protein kinase PERK9 [Glycine max]
Glyma.10G142600	-	-	-	-	-	-	-	-	-	-	-	-	-	-	-	-	2.52666	up	1.90152e-06	9.87287e-05	3434	ko04075//Plant hormone signal transduction;ko04712//Circadian rhythm - plant;ko04626//Plant-pathogen interaction	-	-	-	gi|947085014|gb|KRH33735.1|;gi|918463621|gb|ALA09155.1|/0;0/hypothetical protein GLYMA_10G142600 [Glycine max];bHLH transcription factor, partial [Glycine max]
Glyma.03G043000	-1.35512	down	0.000206606	0.00359165	-	-	-	-	-	-	-	-	-	-	-	-	2.5216	up	0.00369937	0.023898	3748	ko00230//Purine metabolism;ko00240//Pyrimidine metabolism;ko01100//Metabolic pathways;ko03020//RNA polymerase;ko04626//Plant-pathogen interaction	-	-	-	gi|955310860|ref|XP_014628983.1|/0/PREDICTED: putative disease resistance protein At3g14460 [Glycine max]
Glyma.01G093100	-1.08627	down	0.00549706	0.0442244	-	-	-	-	-	-	-	-	-	-	-	-	2.5204	up	3.8036e-07	2.90838e-05	2915	ko04626//Plant-pathogen interaction	-	GO:0004672//protein kinase activity;GO:0032550	GO:0006464//cellular protein modification process	gi|955302504|ref|XP_003516269.2|/0/PREDICTED: proline-rich receptor-like protein kinase PERK10, partial [Glycine max]
Glyma.11G020700	-	-	-	-	-	-	-	-	-	-	-	-	-	-	-	-	2.51182	up	0.000314069	0.00425335	4134	ko04626//Plant-pathogen interaction	GO:0031224//intrinsic component of membrane	GO:0046872//metal ion binding;GO:0016651//oxidoreductase activity, acting on NAD(P)H;GO:0016209//antioxidant activity	GO:0044710	gi|947079092|gb|KRH27881.1|;gi|356539557|ref|XP_003538264.1|/0;0/hypothetical protein GLYMA_11G020700 [Glycine max];PREDICTED: respiratory burst oxidase homolog protein A [Glycine max]
Glyma.04G076200	-	-	-	-	-	-	-	-	-	-	-	-	-	-	-	-	2.50612	up	0.000898768	0.0088301	1659	ko04626//Plant-pathogen interaction	-	GO:0005488	GO:0050896//response to stimulus	gi|151934217|gb|ABS18446.1|/1.29563e-158/WRKY50 [Glycine max]
Glyma.08G284100	-	-	-	-	-	-	-	-	-	-	-	-	-	-	-	-	2.49575	up	0.00625628	0.0346052	2697	ko04075//Plant hormone signal transduction;ko04626//Plant-pathogen interaction	-	GO:0004672//protein kinase activity;GO:0032550	GO:0016310//phosphorylation;GO:0006464//cellular protein modification process	gi|571468833|ref|XP_006584462.1|/0/PREDICTED: protein kinase family protein isoform X1 [Glycine max]
Glyma.13G341500	-	-	-	-	-	-	-	-	-	-	-	-	-	-	-	-	2.49335	up	6.07168e-06	0.000239455	2209	ko04626//Plant-pathogen interaction	-	-	-	gi|359806061|ref|NP_001240925.1|/0/DNA-damage-repair/toleration protein DRT100-like precursor [Glycine max]
Glyma.13G283600	-	-	-	-	-	-	-	-	-4.07132	down	3.79049e-06	0.000334626	-	-	-	-	2.49105	up	0.000495351	0.00576179	1652	ko04070//Phosphatidylinositol signaling system;ko04626//Plant-pathogen interaction	-	GO:0046872//metal ion binding	GO:0009725//response to hormone;GO:0009628//response to abiotic stimulus	gi|351727745|ref|NP_001238195.1|/1.28283e-78/uncharacterized protein LOC100306396 [Glycine max]
Glyma.03G054800	-	-	-	-	-	-	-	-	-	-	-	-	-	-	-	-	2.46534	up	0.00108943	0.0100393	3125	ko04626//Plant-pathogen interaction	-	-	-	gi|947117434|gb|KRH65683.1|/0/hypothetical protein GLYMA_03G054800 [Glycine max]
Glyma.17G209000	-	-	-	-	-	-	-	-	-	-	-	-	-	-	-	-	2.45987	up	0.00298983	0.0207679	1364	ko04075//Plant hormone signal transduction;ko04626//Plant-pathogen interaction	-	GO:0016491//oxidoreductase activity	-	gi|571538353|ref|XP_006601141.1|/1.5634e-173/PREDICTED: transcription factor MYC2-like [Glycine max]
Glyma.17G118300	-	-	-	-	-	-	-	-	-	-	-	-	-	-	-	-	2.45514	up	1.77803e-05	0.000537764	2965	ko04626//Plant-pathogen interaction	GO:0031224//intrinsic component of membrane	GO:0005249//voltage-gated potassium channel activity;GO:0005515//protein binding	GO:0010119//regulation of stomatal movement;GO:0048588//developmental cell growth;GO:0006970//response to osmotic stress;GO:0071805//potassium ion transmembrane transport	gi|947054292|gb|KRH03745.1|;gi|947054293|gb|KRH03746.1|/0;0/hypothetical protein GLYMA_17G118300 [Glycine max];hypothetical protein GLYMA_17G118300 [Glycine max]
Glyma.13G032100	-	-	-	-	-	-	-	-	-	-	-	-	-	-	-	-	2.45312	up	0.000930083	0.00904737	2332	ko04626//Plant-pathogen interaction	-	GO:0004672//protein kinase activity;GO:0032550	GO:0006464//cellular protein modification process	gi|356547489|ref|XP_003542144.1|/0/PREDICTED: probable receptor-like protein kinase At1g11050 [Glycine max]
Glyma.03G043600	-	-	-	-	-	-	-	-	-	-	-	-	-	-	-	-	2.45282	up	0.00875814	0.0437624	3606	ko00230//Purine metabolism;ko00240//Pyrimidine metabolism;ko01100//Metabolic pathways;ko03020//RNA polymerase;ko04626//Plant-pathogen interaction	-	-	-	gi|947117290|gb|KRH65539.1|/0/hypothetical protein GLYMA_03G043600 [Glycine max]
Glyma.18G283200	-	-	-	-	-	-	-	-	-	-	-	-	-	-	-	-	2.45281	up	0.000368038	0.00471131	2511	ko04626//Plant-pathogen interaction	-	-	-	gi|947052005|gb|KRH01534.1|/0/hypothetical protein GLYMA_18G283200 [Glycine max]
Glyma.12G198800	-	-	-	-	-	-	-	-	-	-	-	-	-	-	-	-	2.43841	up	0.00663862	0.0359347	2355	ko04075//Plant hormone signal transduction;ko04626//Plant-pathogen interaction	-	GO:0004672//protein kinase activity;GO:0032550	GO:0006796//phosphate-containing compound metabolic process;GO:0006464//cellular protein modification process;GO:0008037//cell recognition	gi|947078031|gb|KRH26871.1|/0/hypothetical protein GLYMA_12G198800 [Glycine max]
Glyma.12G236500	-	-	-	-	-	-	-	-	-	-	-	-	-	-	-	-	2.42635	up	0.0101426	0.0484631	3554	ko04626//Plant-pathogen interaction	-	-	-	gi|571494846|ref|XP_006592960.1|;gi|571494848|ref|XP_006592961.1|/0;0/PREDICTED: probable disease resistance protein At1g61300 isoform X1 [Glycine max];PREDICTED: probable disease resistance protein At1g61300 isoform X2 [Glycine max]
Glyma.07G096300	-	-	-	-	-	-	-	-	-	-	-	-	-	-	-	-	2.42266	up	0.0101601	0.0485226	2095	ko04626//Plant-pathogen interaction	-	GO:0004672//protein kinase activity;GO:0032550	GO:0006464//cellular protein modification process	gi|947100059|gb|KRH48551.1|/0/hypothetical protein GLYMA_07G0963002, partial [Glycine max]
Glyma.07G078100	-	-	-	-	-	-	-	-	-	-	-	-	-	-	-	-	2.40109	up	0.00924354	0.0453219	4442	ko04626//Plant-pathogen interaction	-	-	-	gi|571465379|ref|XP_006583346.1|/0/PREDICTED: uncharacterized protein LOC100797869 isoform X2 [Glycine max]
Glyma.02G115200	-	-	-	-	-	-	-	-	-	-	-	-	-	-	-	-	2.40077	up	0.000171594	0.00276812	1754	ko04626//Plant-pathogen interaction	-	GO:0001071//nucleic acid binding transcription factor activity;GO:0003677//DNA binding	GO:0006970//response to osmotic stress;GO:0006351//transcription, DNA-templated	gi|571439709|ref|XP_006574933.1|/0/PREDICTED: transcription factor [Glycine max]
Glyma.02G075600	-	-	-	-	-	-	-	-	-	-	-	-	-	-	-	-	2.39931	up	0.000609157	0.00674186	2511	ko04075//Plant hormone signal transduction;ko04626//Plant-pathogen interaction	-	GO:0004672//protein kinase activity;GO:0032550	GO:0006796//phosphate-containing compound metabolic process;GO:0006464//cellular protein modification process;GO:0008037//cell recognition	gi|356502317|ref|XP_003519966.1|/0/PREDICTED: G-type lectin S-receptor-like serine/threonine-protein kinase At1g34300 [Glycine max]
Glyma.09G071600	-	-	-	-	-	-	-	-	-	-	-	-	-	-	-	-	2.38848	up	9.37565e-05	0.00178985	1296	ko04075//Plant hormone signal transduction;ko04626//Plant-pathogen interaction	-	-	-	gi|947088863|gb|KRH37528.1|;gi|734350125|gb|KHN12298.1|;gi|947088864|gb|KRH37529.1|/5.27161e-146;1.94042e-171;2.31796e-142/hypothetical protein GLYMA_09G071600 [Glycine max];Protein TIFY 10A [Glycine soja] ;hypothetical protein GLYMA_09G071600 [Glycine max]
Glyma.02G245700	-	-	-	-	-	-	-	-	-	-	-	-	-	-	-	-	2.38419	up	0.00331838	0.0221907	1530	ko04626//Plant-pathogen interaction	GO:0016020//membrane	GO:0046872//metal ion binding	GO:0009642//response to light intensity;GO:0006952//defense response;GO:0010038//response to metal ion;GO:0001101//response to acid chemical;GO:0000302//response to reactive oxygen species;GO:0009908//flower development;GO:0009725//response to hormone;GO:0048571//long-day photoperiodism;GO:0051171//regulation of nitrogen compound metabolic process	gi|356501039|ref|XP_003519336.1|/3.57948e-97/PREDICTED: probable calcium-binding protein CML18 [Glycine max]
Glyma.10G253000	-	-	-	-	-	-	-	-	-	-	-	-	-	-	-	-	2.33106	up	2.41402e-05	0.000671056	2565	ko04626//Plant-pathogen interaction	-	GO:0004672//protein kinase activity;GO:0032550	GO:0006796//phosphate-containing compound metabolic process;GO:0006464//cellular protein modification process	gi|955347300|ref|XP_014618865.1|/0/PREDICTED: cysteine-rich receptor-like protein kinase 10 isoform X1 [Glycine max]
Glyma.18G050700	-	-	-	-	-	-	-	-	-	-	-	-	-	-	-	-	2.32729	up	0.00103551	0.00974069	3603	ko04626//Plant-pathogen interaction	GO:0031224//intrinsic component of membrane	GO:0004672//protein kinase activity;GO:0032550	GO:0006796//phosphate-containing compound metabolic process;GO:0006464//cellular protein modification process	gi|356569432|ref|XP_003552905.1|/0/PREDICTED: probable LRR receptor-like serine/threonine-protein kinase At1g06840 [Glycine max]
Glyma.11G077300	-	-	-	-	-	-	-	-	-	-	-	-	-	-	-	-	2.31765	up	8.46672e-05	0.00166194	2362	ko04626//Plant-pathogen interaction	-	GO:0046872//metal ion binding;GO:0004672//protein kinase activity;GO:0032550	GO:0006796//phosphate-containing compound metabolic process;GO:0006464//cellular protein modification process	gi|947080010|gb|KRH28799.1|;gi|356540813|ref|XP_003538879.1|/0;0/hypothetical protein GLYMA_11G077300 [Glycine max];PREDICTED: calcium-dependent protein kinase 28-like [Glycine max]
Glyma.15G179600	-	-	-	-	-	-	-	-	-1.96494	down	0.0012742	0.0466228	-	-	-	-	2.30492	up	1.76458e-05	0.000536375	1680	ko04075//Plant hormone signal transduction;ko04626//Plant-pathogen interaction	-	-	-	gi|947063310|gb|KRH12571.1|;gi|947063309|gb|KRH12570.1|;gi|734424752|gb|KHN42787.1|/7.42797e-148;1.06902e-172;0/hypothetical protein GLYMA_15G179600 [Glycine max];hypothetical protein GLYMA_15G179600 [Glycine max];Protein TIFY 10A [Glycine soja]
Glyma.07G063300	-2.20965	down	8.89434e-20	3.09239e-17	-	-	-	-	-	-	-	-	-	-	-	-	2.28114	up	7.657e-06	0.000283683	6579	ko04626//Plant-pathogen interaction	-	GO:0036094//small molecule binding;GO:0097159//organic cyclic compound binding;GO:1901363	-	gi|947099527|gb|KRH48019.1|/0/hypothetical protein GLYMA_07G0633001, partial [Glycine max]
Glyma.13G244200	-	-	-	-	-	-	-	-	-	-	-	-	-	-	-	-	2.27949	up	0.00369164	0.0238751	3079	ko04626//Plant-pathogen interaction	-	GO:0032550;GO:0016301//kinase activity	GO:0048827//phyllome development;GO:0009913//epidermal cell differentiation;GO:0006464//cellular protein modification process;GO:0006796//phosphate-containing compound metabolic process;GO:0001708//cell fate specification;GO:0009653//anatomical structure morphogenesis;GO:0003006//developmental process involved in reproduction	gi|571500270|ref|XP_006594611.1|/0/PREDICTED: protein STRUBBELIG-RECEPTOR FAMILY 3-like [Glycine max]
Glyma.08G271900	-	-	-	-	-	-	-	-	-	-	-	-	-	-	-	-	2.27188	up	2.14018e-07	1.85532e-05	2704	ko04075//Plant hormone signal transduction;ko04626//Plant-pathogen interaction	-	-	-	gi|356526715|ref|XP_003531962.1|/0/PREDICTED: transcription factor MYC2 [Glycine max]
Glyma.08G303700	-	-	-	-	-	-	-	-	-	-	-	-	-	-	-	-	2.27129	up	0.00448031	0.027386	4369	ko00230//Purine metabolism;ko00240//Pyrimidine metabolism;ko01100//Metabolic pathways;ko03020//RNA polymerase;ko04626//Plant-pathogen interaction	-	-	-	gi|356524185|ref|XP_003530712.1|/0/PREDICTED: TMV resistance protein N-like isoform X2 [Glycine max]
Glyma.16G031600	-	-	-	-	-	-	-	-	-	-	-	-	-	-	-	-	2.24955	up	7.0515e-05	0.0014521	8938	ko04626//Plant-pathogen interaction	-	-	-	gi|947057170|gb|KRH06576.1|;gi|947057169|gb|KRH06575.1|;gi|571525240|ref|XP_003548632.2|/0;0;0/hypothetical protein GLYMA_16G031600 [Glycine max];hypothetical protein GLYMA_16G031600 [Glycine max];PREDICTED: uncharacterized protein LOC100809946 isoform X2 [Glycine max]
Glyma.06G263900	-	-	-	-	-	-	-	-	-	-	-	-	-	-	-	-	2.24884	up	0.00447737	0.0273738	4654	ko00230//Purine metabolism;ko00240//Pyrimidine metabolism;ko01100//Metabolic pathways;ko03020//RNA polymerase;ko04626//Plant-pathogen interaction	-	-	-	gi|955325893|ref|XP_014632232.1|/0/PREDICTED: disease resistance protein TAO1-like isoform X1 [Glycine max]
Glyma.15G168200	-	-	-	-	-	-	-	-	-	-	-	-	-	-	-	-	2.24855	up	6.1198e-07	4.11658e-05	1264	ko04626//Plant-pathogen interaction	-	-	-	gi|571519233|ref|XP_006597810.1|/1.06697e-143/PREDICTED: probable WRKY transcription factor 11 [Glycine max]
Glyma.02G037200	-1.76563	down	8.59902e-08	4.59591e-06	-	-	-	-	-	-	-	-	-	-	-	-	2.23956	up	0.00123048	0.0109877	2518	ko04075//Plant hormone signal transduction;ko04626//Plant-pathogen interaction	-	GO:0004672//protein kinase activity;GO:0032550	GO:0006468//protein phosphorylation	gi|734312199|gb|KHN00377.1|/0/Cysteine-rich receptor-like protein kinase 3 [Glycine soja]
Glyma.06G262700	-	-	-	-	-	-	-	-	-	-	-	-	-	-	-	-	2.21301	up	0.00240823	0.0176841	3570	ko04626//Plant-pathogen interaction	-	GO:0004672//protein kinase activity	GO:0006796//phosphate-containing compound metabolic process	gi|955325868|ref|XP_014632226.1|;gi|955325866|ref|XP_014632225.1|/0;0/PREDICTED: G-type lectin S-receptor-like serine/threonine-protein kinase At4g27290 isoform X2 [Glycine max];PREDICTED: G-type lectin S-receptor-like serine/threonine-protein kinase At4g27290 isoform X1 [Glycine max]
Glyma.15G030000	-	-	-	-	-	-	-	-	-	-	-	-	-	-	-	-	2.20226	up	0.00691327	0.036987	2706	ko04626//Plant-pathogen interaction	GO:0016023//cytoplasmic membrane-bounded vesicle	GO:0032550;GO:0004672//protein kinase activity;GO:0046983//protein dimerization activity	GO:0048364//root development;GO:0006464//cellular protein modification process;GO:0008356//asymmetric cell division;GO:0009791//post-embryonic development;GO:0006796//phosphate-containing compound metabolic process;GO:0003006//developmental process involved in reproduction	gi|947060869|gb|KRH10130.1|/0/hypothetical protein GLYMA_15G030000 [Glycine max]
Glyma.U021800	-	-	-	-	-	-	-	-	-4.46475	down	4.83695e-06	0.000409265	-	-	-	-	2.1905	up	9.33688e-05	0.00178603	2236	ko04650//Natural killer cell mediated cytotoxicity;ko04626//Plant-pathogen interaction	-	GO:0004702//receptor signaling protein serine/threonine kinase activity;GO:0032550	GO:0045682//regulation of epidermis development;GO:0051707//response to other organism;GO:0009411//response to UV;GO:0009700//indole phytoalexin biosynthetic process;GO:0010243//response to organonitrogen compound;GO:0090567;GO:0080135//regulation of cellular response to stress;GO:0000187//activation of MAPK activity	gi|734378345|gb|KHN22030.1|;gi|947039232|gb|KRG89067.1|;gi|947039231|gb|KRG89066.1|/0;0;1.25479e-175/Mitogen-activated protein kinase 3 [Glycine soja] ;hypothetical protein GLYMA_U021800 [Glycine max];hypothetical protein GLYMA_U021800 [Glycine max]
Glyma.06G171700	-	-	-	-	-	-	-	-	-	-	-	-	-	-	-	-	2.17475	up	0.00316588	0.0216066	3031	ko04626//Plant-pathogen interaction	-	GO:0016301//kinase activity;GO:0032550	GO:0006796//phosphate-containing compound metabolic process;GO:0006464//cellular protein modification process	gi|356518897|ref|XP_003528113.1|;gi|947105826|gb|KRH54209.1|/0;0/PREDICTED: probable inactive leucine-rich repeat receptor-like protein kinase At3g03770 isoform X1 [Glycine max];hypothetical protein GLYMA_06G171700 [Glycine max]
Glyma.12G217500	-	-	-	-	-	-	-	-	-	-	-	-	-	-	-	-	2.14759	up	1.86426e-05	0.000555596	744	ko04070//Phosphatidylinositol signaling system;ko04626//Plant-pathogen interaction	-	GO:0046872//metal ion binding	GO:0009725//response to hormone;GO:0009628//response to abiotic stimulus	gi|351722363|ref|NP_001238521.1|/5.24239e-78/uncharacterized protein LOC100500465 [Glycine max]
Glyma.01G166100	-	-	-	-	-	-	-	-	-2.19408	down	0.00120782	0.0451012	-	-	-	-	2.1374	up	4.51485e-05	0.00104775	2572	ko04626//Plant-pathogen interaction	-	GO:0046872//metal ion binding;GO:0004672//protein kinase activity;GO:0032550	GO:0006796//phosphate-containing compound metabolic process;GO:0006464//cellular protein modification process	gi|947128803|gb|KRH76657.1|;gi|571435690|ref|XP_006573556.1|/0;0/hypothetical protein GLYMA_01G166100 [Glycine max];PREDICTED: calcium-dependent protein kinase 28-like [Glycine max]
Glyma.09G172500	-	-	-	-	-1.5482	down	0.000245223	0.0184305	-	-	-	-	-	-	-	-	2.12165	up	0.000203134	0.00311818	1444	ko04626//Plant-pathogen interaction	-	GO:0032550;GO:0004672//protein kinase activity;GO:0019887//protein kinase regulator activity	GO:0001934//positive regulation of protein phosphorylation;GO:0006351//transcription, DNA-templated;GO:0002239//response to oomycetes;GO:0009617//response to bacterium;GO:0009692;GO:0009700//indole phytoalexin biosynthetic process;GO:0006970//response to osmotic stress;GO:0000160//phosphorelay signal transduction system;GO:0060918//auxin transport;GO:0009627//systemic acquired resistance	gi|356531126|ref|XP_003534129.1|/0/PREDICTED: mitogen-activated protein kinase kinase 9 [Glycine max]
Glyma.17G218500	-	-	-	-	-	-	-	-	-	-	-	-	-	-	-	-	2.10669	up	9.07092e-06	0.000324607	2394	ko04626//Plant-pathogen interaction	-	GO:0004672//protein kinase activity;GO:0032550	GO:0006796//phosphate-containing compound metabolic process;GO:0006464//cellular protein modification process	gi|356563936|ref|XP_003550213.1|/0/PREDICTED: L-type lectin-domain containing receptor kinase IX.1-like [Glycine max]
Glyma.03G047000	-	-	-	-	-	-	-	-	-	-	-	-	-	-	-	-	2.07611	up	0.00894112	0.0443958	5472	ko00230//Purine metabolism;ko00240//Pyrimidine metabolism;ko01100//Metabolic pathways;ko03020//RNA polymerase;ko04626//Plant-pathogen interaction	-	-	-	gi|955310901|ref|XP_006576474.2|/0/PREDICTED: putative disease resistance RPP13-like protein 1 [Glycine max]
Glyma.16G136600	-2.1744	down	1.08835e-08	7.08582e-07	-	-	-	-	-3.26279	down	4.41623e-06	0.000381056	-	-	-	-	2.07556	up	0.00593946	0.0333871	4635	ko00230//Purine metabolism;ko00240//Pyrimidine metabolism;ko01100//Metabolic pathways;ko03020//RNA polymerase;ko04626//Plant-pathogen interaction	-	-	-	gi|571528161|ref|XP_006599364.1|/0/PREDICTED: protein SUPPRESSOR OF npr1-1, CONSTITUTIVE 1 [Glycine max]
Glyma.09G191300	-	-	-	-	-	-	-	-	-	-	-	-	-	-	-	-	2.06922	up	8.50145e-05	0.00166609	2501	ko04626//Plant-pathogen interaction	-	GO:0004672//protein kinase activity;GO:0032550;GO:0005198//structural molecule activity	GO:0006468//protein phosphorylation	gi|571475633|ref|XP_006586722.1|/0/PREDICTED: putative receptor protein kinase PERK1 isoform X1 [Glycine max]
Glyma.14G013300	-	-	-	-	-	-	-	-	-	-	-	-	-	-	-	-	2.06612	up	0.0047213	0.0284025	1947	ko04075//Plant hormone signal transduction;ko04626//Plant-pathogen interaction	-	GO:0004672//protein kinase activity;GO:0032550	GO:0006796//phosphate-containing compound metabolic process;GO:0006464//cellular protein modification process	gi|571506326|ref|XP_006595690.1|/0/PREDICTED: probable L-type lectin-domain containing receptor kinase S.7 [Glycine max]
Glyma.03G220800	-	-	-	-	-	-	-	-	-	-	-	-	-	-	-	-	2.04961	up	0.00933447	0.045628	1466	ko04626//Plant-pathogen interaction	-	GO:0003677//DNA binding;GO:0001071//nucleic acid binding transcription factor activity	GO:0006351//transcription, DNA-templated	gi|918463819|gb|ALA09254.1|/0/WRKY transcription factor, partial [Glycine max]
Glyma.06G077400	-	-	-	-	-	-	-	-	-	-	-	-	-	-	-	-	2.04228	up	0.000242261	0.0035163	1510	ko04626//Plant-pathogen interaction	-	GO:0001071//nucleic acid binding transcription factor activity;GO:0003677//DNA binding;GO:0005515//protein binding	GO:0009617//response to bacterium;GO:0010243//response to organonitrogen compound;GO:0006351//transcription, DNA-templated	gi|351726405|ref|NP_001238661.1|/2.62285e-180/transcription factor [Glycine max]
Glyma.20G211700	-	-	-	-	-	-	-	-	-	-	-	-	-	-	-	-	2.03992	up	0.0102081	0.0487246	1000	ko04626//Plant-pathogen interaction	-	GO:0046872//metal ion binding	GO:0019932//second-messenger-mediated signaling	gi|734324268|gb|KHN05043.1|/2.79458e-103/Calmodulin-like protein 11 [Glycine soja]
Glyma.15G209300	-	-	-	-	-	-	-	-	-	-	-	-	2.01415	up	8.1503e-07	0.000120503	2.03631	up	0.000725057	0.00759154	1603	ko04075//Plant hormone signal transduction;ko04626//Plant-pathogen interaction	-	-	-	gi|358248196|ref|NP_001239837.1|/0/polygalacturonase inhibitor 1-like precursor [Glycine max]
Glyma.09G188600	-	-	-	-	-	-	-	-	-	-	-	-	-	-	-	-	2.012	up	3.63232e-08	4.70898e-06	1689	ko04626//Plant-pathogen interaction	-	-	-	gi|947090594|gb|KRH39259.1|/0/hypothetical protein GLYMA_09G188600 [Glycine max]
Glyma.15G166800	-	-	-	-	-	-	-	-	-	-	-	-	-	-	-	-	1.98857	up	0.00304374	0.0210297	1468	ko04075//Plant hormone signal transduction;ko04626//Plant-pathogen interaction	-	GO:0005515//protein binding	-	gi|734359974|gb|KHN15341.1|;gi|947063074|gb|KRH12335.1|/4.00382e-169;8.36369e-155/Transcription factor bHLH35 [Glycine soja] ;hypothetical protein GLYMA_15G166800 [Glycine max]
Glyma.13G351500	-	-	-	-	-	-	-	-	-	-	-	-	-	-	-	-	1.96196	up	0.000395173	0.0049433	2061	ko04626//Plant-pathogen interaction	-	GO:0004672//protein kinase activity;GO:0032550	GO:0006468//protein phosphorylation	gi|947074444|gb|KRH23335.1|/0/hypothetical protein GLYMA_13G351500 [Glycine max]
Glyma.08G018900	-	-	-	-	-	-	-	-	-	-	-	-	-	-	-	-	1.94321	up	0.000264153	0.00374077	4160	ko04626//Plant-pathogen interaction	GO:0031224//intrinsic component of membrane	GO:0046872//metal ion binding;GO:0016651//oxidoreductase activity, acting on NAD(P)H;GO:0016209//antioxidant activity	GO:0044710	gi|356528819|ref|XP_003532995.1|/0/PREDICTED: respiratory burst oxidase homolog protein A-like [Glycine max]
Glyma.06G077300	-	-	-	-	-	-	-	-	-	-	-	-	-	-	-	-	1.92549	up	0.00109089	0.0100463	2515	ko04626//Plant-pathogen interaction	GO:0031224//intrinsic component of membrane	GO:0015075//ion transmembrane transporter activity	GO:0006811//ion transport;GO:0044763	gi|356518290|ref|XP_003527812.1|/0/PREDICTED: putative cyclic nucleotide-gated ion channel 18 [Glycine max]
Glyma.03G130800	-	-	-	-	-	-	-	-	-	-	-	-	-	-	-	-	1.9233	up	0.00129988	0.0114003	1292	ko04626//Plant-pathogen interaction	GO:0016020//membrane	GO:0046872//metal ion binding	-	gi|356504734|ref|XP_003521150.1|/1.60881e-141/PREDICTED: probable calcium-binding protein CML36 [Glycine max]
Glyma.07G056400	-	-	-	-	-	-	-	-	-	-	-	-	-	-	-	-	1.9013	up	0.00691249	0.036987	2697	ko04626//Plant-pathogen interaction	GO:0031224//intrinsic component of membrane	GO:0005267//potassium channel activity	GO:0034220//ion transmembrane transport;GO:0030001//metal ion transport	gi|571465040|ref|XP_006583243.1|/0/PREDICTED: cyclic nucleotide-gated ion channel 1-like [Glycine max]
Glyma.05G232000	-	-	-	-	-	-	-	-	-	-	-	-	-	-	-	-	1.89839	up	2.35068e-05	0.00065988	2142	ko04626//Plant-pathogen interaction	-	-	-	gi|734377070|gb|KHN21547.1|/0/Leucine-rich repeat extensin-like protein 5 [Glycine soja]
Glyma.09G199900	-	-	-	-	-	-	-	-	-	-	-	-	-	-	-	-	1.8369	up	0.00245598	0.0179238	2123	ko04626//Plant-pathogen interaction	GO:0044444	GO:0032550;GO:0004672//protein kinase activity;GO:0019899//enzyme binding	GO:0006468//protein phosphorylation;GO:0009723//response to ethylene;GO:0009610//response to symbiotic fungus;GO:0045087//innate immune response	gi|356531361|ref|XP_003534246.1|/0/PREDICTED: receptor-like cytosolic serine/threonine-protein kinase RBK1 [Glycine max]
Glyma.07G088300	-1.03703	down	2.9533e-05	0.000735598	-	-	-	-	-	-	-	-	-	-	-	-	1.82871	up	2.70263e-07	2.20864e-05	1467	ko04626//Plant-pathogen interaction	-	-	-	gi|947099935|gb|KRH48427.1|/0/hypothetical protein GLYMA_07G088300 [Glycine max]
Glyma.06G161200	-	-	-	-	-	-	-	-	-	-	-	-	-	-	-	-	1.82348	up	5.8414e-07	4.00487e-05	1974	ko04626//Plant-pathogen interaction	-	GO:0032550;GO:0004672//protein kinase activity;GO:0046872//metal ion binding	GO:0006464//cellular protein modification process;GO:0009755//hormone-mediated signaling pathway;GO:0006796//phosphate-containing compound metabolic process	gi|734341045|gb|KHN09683.1|/0/Calcium-dependent protein kinase SK5 [Glycine soja]
Glyma.08G290200	-	-	-	-	-	-	-	-	-	-	-	-	-	-	-	-	1.8229	up	0.00301521	0.0208928	2192	ko04626//Plant-pathogen interaction	-	GO:0004672//protein kinase activity;GO:0032550	GO:0006796//phosphate-containing compound metabolic process;GO:0006464//cellular protein modification process	gi|734345203|gb|KHN10619.1|/0/Serine/threonine-protein kinase PBS1 [Glycine soja]
Glyma.15G065200	-	-	-	-	-	-	-	-	-	-	-	-	-	-	-	-	1.78024	up	1.07984e-05	0.000369281	3227	ko04626//Plant-pathogen interaction	-	GO:0004672//protein kinase activity;GO:0032550	GO:0006796//phosphate-containing compound metabolic process;GO:0006464//cellular protein modification process;GO:0008037//cell recognition	gi|955372320|ref|XP_014623591.1|;gi|947061453|gb|KRH10714.1|/0;0/PREDICTED: G-type lectin S-receptor-like serine/threonine-protein kinase B120 [Glycine max];hypothetical protein GLYMA_15G065200 [Glycine max]
Glyma.01G196000	-	-	-	-	-	-	-	-	-	-	-	-	-	-	-	-	1.76396	up	0.00240751	0.0176834	1433	ko04626//Plant-pathogen interaction	-	-	-	gi|947129312|gb|KRH77166.1|/1.33443e-161/hypothetical protein GLYMA_01G196000 [Glycine max]
Glyma.15G023200	-	-	-	-	-	-	-	-	-	-	-	-	-	-	-	-	1.74923	up	0.00147284	0.0124281	3534	ko04626//Plant-pathogen interaction	-	GO:0004672//protein kinase activity;GO:0032550	GO:0006468//protein phosphorylation	gi|571514979|ref|XP_003546664.2|/0/PREDICTED: inactive protein kinase SELMODRAFT_444075-like [Glycine max]
Glyma.11G246200	-	-	-	-	-	-	-	-	-	-	-	-	-	-	-	-	1.71692	up	0.0104781	0.0496542	3308	ko04075//Plant hormone signal transduction;ko04626//Plant-pathogen interaction	-	GO:0004672//protein kinase activity;GO:0032550	GO:0006796//phosphate-containing compound metabolic process;GO:0006464//cellular protein modification process	gi|955351777|ref|XP_014619757.1|;gi|356538111|ref|XP_003537548.1|;gi|947082611|gb|KRH31400.1|;gi|947082608|gb|KRH31397.1|;gi|947082610|gb|KRH31399.1|;gi|947082607|gb|KRH31396.1|/0;0;0;0;0;0/PREDICTED: probable LRR receptor-like serine/threonine-protein kinase At1g67720 isoform X2 [Glycine max];PREDICTED: probable LRR receptor-like serine/threonine-protein kinase At1g67720 isoform X1 [Glycine max]…
Glyma.07G015300	-	-	-	-	-	-	-	-	-	-	-	-	-	-	-	-	1.71489	up	0.000119889	0.00213424	2873	ko04626//Plant-pathogen interaction	-	GO:0004672//protein kinase activity;GO:0032550	GO:0006796//phosphate-containing compound metabolic process;GO:0006464//cellular protein modification process;GO:0044036//cell wall macromolecule metabolic process	gi|571464387|ref|XP_006583047.1|/0/PREDICTED: lysM domain receptor-like kinase 3 isoform X2 [Glycine max]
Glyma.16G157400	-	-	-	-	-	-	-	-	-	-	-	-	-	-	-	-	1.6993	up	0.00871002	0.0436128	3424	ko04075//Plant hormone signal transduction;ko04626//Plant-pathogen interaction	-	GO:0004672//protein kinase activity;GO:0032550	GO:0006796//phosphate-containing compound metabolic process;GO:0006464//cellular protein modification process;GO:0008037//cell recognition	gi|947059159|gb|KRH08565.1|/0/hypothetical protein GLYMA_16G157400 [Glycine max]
Glyma.18G185400	-	-	-	-	-	-	-	-	-	-	-	-	-	-	-	-	1.69531	up	0.0032272	0.0218682	2562	ko04075//Plant hormone signal transduction;ko04626//Plant-pathogen interaction	-	GO:0004672//protein kinase activity;GO:0032550	GO:0006468//protein phosphorylation	gi|734323185|gb|KHN04723.1|/0/L-type lectin-domain containing receptor kinase IV.1 [Glycine soja]
Glyma.16G085900	-	-	-	-	-	-	-	-	-	-	-	-	-	-	-	-	1.68542	up	4.79813e-05	0.00109741	5021	ko00230//Purine metabolism;ko00240//Pyrimidine metabolism;ko01100//Metabolic pathways;ko03020//RNA polymerase;ko04626//Plant-pathogen interaction	-	-	GO:0050896//response to stimulus	gi|571526823|ref|XP_003548631.2|;gi|947057991|gb|KRH07397.1|;gi|947057995|gb|KRH07401.1|;gi|734363398|gb|KHN16501.1|/0;0;0;0/PREDICTED: TMV resistance protein N-like [Glycine max];hypothetical protein GLYMA_16G085900 [Glycine max];hypothetical protein GLYMA_16G085900 [Glycine max];TMV resistance protein N [Glycine soja]
Glyma.14G161600	-	-	-	-	-	-	-	-	-	-	-	-	-	-	-	-	1.67161	up	0.000567859	0.00641422	2733	ko04626//Plant-pathogen interaction	GO:0031224//intrinsic component of membrane	GO:0005217//intracellular ligand-gated ion channel activity	GO:0044763;GO:0070838//divalent metal ion transport	gi|356551532|ref|XP_003544128.1|/0/PREDICTED: cyclic nucleotide-gated ion channel 1-like [Glycine max]
Glyma.08G060500	-	-	-	-	-	-	-	-	-	-	-	-	-	-	-	-	1.65122	up	0.00695288	0.0371285	3278	ko04626//Plant-pathogen interaction	-	GO:0004672//protein kinase activity;GO:0032550	GO:0006796//phosphate-containing compound metabolic process;GO:0006464//cellular protein modification process;GO:0008037//cell recognition	gi|947093372|gb|KRH41957.1|;gi|947093371|gb|KRH41956.1|/0;0/hypothetical protein GLYMA_08G060500 [Glycine max];hypothetical protein GLYMA_08G060500 [Glycine max]
Glyma.19G132800	-	-	-	-	-	-	-	-	-	-	-	-	-	-	-	-	1.64426	up	0.00041806	0.00511958	1542	ko04626//Plant-pathogen interaction	GO:0016020//membrane	GO:0046872//metal ion binding	-	gi|356571963|ref|XP_003554140.1|/8.59197e-143/PREDICTED: probable calcium-binding protein CML36 [Glycine max]
Glyma.08G259000	-1.14504	down	0.000992153	0.0124945	-	-	-	-	-	-	-	-	-	-	-	-	1.62578	up	0.002462	0.0179542	2737	ko04626//Plant-pathogen interaction	-	-	-	gi|571473175|ref|XP_006585845.1|/0/PREDICTED: putative disease resistance RPP13-like protein 3 [Glycine max]
Glyma.U008300	1.95409	up	3.67917e-09	2.63439e-07	1.94453	up	2.20798e-05	0.00211743	-	-	-	-	-	-	-	-	1.62528	up	0.000668043	0.00716826	3851	ko04626//Plant-pathogen interaction	-	-	GO:0050896//response to stimulus	gi|947038217|gb|KRG88524.1|;gi|955395582|ref|XP_014628748.1|/0;0/hypothetical protein GLYMA_U008300 [Glycine max];PREDICTED: protein SUPPRESSOR OF npr1-1, CONSTITUTIVE 1-like isoform X1 [Glycine max]
Glyma.01G183300	-	-	-	-	-	-	-	-	-1.92535	down	0.00106096	0.0404079	-	-	-	-	1.61762	up	0.0031795	0.0216788	2893	ko04626//Plant-pathogen interaction	-	-	-	gi|571435938|ref|XP_006573620.1|/0/PREDICTED: probable disease resistance protein At5g66900 [Glycine max]
Glyma.17G250800	-	-	-	-	-	-	-	-	-	-	-	-	-	-	-	-	1.61735	up	0.00637965	0.0350114	4171	ko04626//Plant-pathogen interaction	-	GO:0016301//kinase activity;GO:0032550	GO:0006464//cellular protein modification process	gi|356562351|ref|XP_003549435.1|/0/PREDICTED: probable LRR receptor-like serine/threonine-protein kinase At2g16250 [Glycine max]
Glyma.01G032900	-	-	-	-	-	-	-	-	-	-	-	-	-	-	-	-	1.61077	up	0.00704688	0.037511	3261	ko04626//Plant-pathogen interaction	-	GO:0036094//small molecule binding;GO:1901363;GO:0097159//organic cyclic compound binding	-	gi|947126778|gb|KRH74632.1|/0/hypothetical protein GLYMA_01G032900 [Glycine max]
Glyma.03G138000	-	-	-	-	-	-	-	-	-	-	-	-	-	-	-	-	1.60409	up	8.50695e-05	0.00166609	2274	ko04626//Plant-pathogen interaction	-	GO:0046872//metal ion binding;GO:0004674//protein serine/threonine kinase activity;GO:0032550	GO:0006796//phosphate-containing compound metabolic process;GO:0006464//cellular protein modification process	gi|356504799|ref|XP_003521182.1|;gi|947118710|gb|KRH66959.1|/0;0/PREDICTED: calcium-dependent protein kinase 32-like [Glycine max];hypothetical protein GLYMA_03G138000 [Glycine max]
Glyma.08G223400	-	-	-	-	-	-	-	-	-	-	-	-	-	-	-	-	1.58341	up	0.00227149	0.0169995	1927	ko04626//Plant-pathogen interaction	GO:0044424	GO:0032550;GO:0004672//protein kinase activity	GO:2000026//regulation of multicellular organismal development;GO:0006464//cellular protein modification process;GO:0006796//phosphate-containing compound metabolic process;GO:0090567	gi|356526330|ref|XP_003531771.1|/0/PREDICTED: mitogen-activated protein kinase kinase 5-like [Glycine max]
Glyma.17G166200	-	-	-	-	-	-	-	-	-	-	-	-	-	-	-	-	1.57639	up	0.00599154	0.0335424	3103	ko04626//Plant-pathogen interaction	-	GO:0004672//protein kinase activity;GO:0032550	GO:0006796//phosphate-containing compound metabolic process;GO:0006464//cellular protein modification process	gi|734391140|gb|KHN27061.1|/0/Putative receptor-like protein kinase [Glycine soja]
Glyma.01G189100	-	-	-	-	-	-	-	-	-	-	-	-	-	-	-	-	1.56901	up	0.00711382	0.0377406	1870	ko04626//Plant-pathogen interaction	-	-	-	gi|571436024|ref|XP_006573647.1|;gi|356496927|ref|XP_003517316.1|/1.38499e-170;5.94037e-177/PREDICTED: probable WRKY transcription factor 15 isoform X2 [Glycine max];PREDICTED: probable WRKY transcription factor 15 isoform X1 [Glycine max]
Glyma.03G043200	-	-	-	-	-	-	-	-	-	-	-	-	-	-	-	-	1.5684	up	0.00751355	0.0392695	3597	ko00230//Purine metabolism;ko00240//Pyrimidine metabolism;ko01100//Metabolic pathways;ko03020//RNA polymerase;ko04626//Plant-pathogen interaction	-	-	-	gi|955310862|ref|XP_006577438.2|/0/PREDICTED: putative disease resistance protein At3g14460 [Glycine max]
Glyma.12G053400	-	-	-	-	-	-	-	-	-	-	-	-	-	-	-	-	1.56451	up	0.00459635	0.0278683	2238	ko04626//Plant-pathogen interaction	-	GO:0046872//metal ion binding;GO:0004674//protein serine/threonine kinase activity;GO:0032550	GO:0006796//phosphate-containing compound metabolic process;GO:0006464//cellular protein modification process	gi|356544533|ref|XP_003540704.1|/0/PREDICTED: calcium-dependent protein kinase 24-like [Glycine max]
Glyma.10G023100	-	-	-	-	-	-	-	-	-	-	-	-	-	-	-	-	1.5572	up	0.000312311	0.00423357	1206	ko04626//Plant-pathogen interaction	-	GO:0016628//oxidoreductase activity, acting on the CH-CH group of donors, NAD or NADP as acceptor;GO:0016772//transferase activity, transferring phosphorus-containing groups	GO:0044710;GO:0006796//phosphate-containing compound metabolic process	gi|356536745|ref|XP_003536896.1|/0/PREDICTED: probably inactive leucine-rich repeat receptor-like protein kinase IMK2 [Glycine max]
Glyma.08G297400	-	-	-	-	-	-	-	-	-	-	-	-	-	-	-	-	1.52401	up	0.000316714	0.00427295	3139	ko04626//Plant-pathogen interaction	-	GO:0016301//kinase activity;GO:0032550	GO:0006464//cellular protein modification process	gi|955337649|ref|XP_014634833.1|/0/PREDICTED: probable LRR receptor-like serine/threonine-protein kinase At1g14390 [Glycine max]
Glyma.12G135600	-	-	-	-	-	-	-	-	-	-	-	-	-	-	-	-	1.52116	up	3.34365e-05	0.000859912	4421	ko04626//Plant-pathogen interaction	-	-	-	gi|734430980|gb|KHN45708.1|/0/TMV resistance protein N [Glycine soja]
Glyma.14G071400	-	-	-	-	-	-	-	-	-	-	-	-	-	-	-	-	1.48845	up	0.00331468	0.0221843	1733	ko04650//Natural killer cell mediated cytotoxicity;ko04626//Plant-pathogen interaction	-	-	-	gi|356551950|ref|XP_003544335.1|/3.19685e-83/PREDICTED: ocs element-binding factor 1 [Glycine max]
Glyma.06G036400	-	-	-	-	-	-	-	-	-	-	-	-	-	-	-	-	1.4688	up	0.0065846	0.0357427	2659	ko04626//Plant-pathogen interaction	-	GO:0016301//kinase activity;GO:0032550;GO:0036094//small molecule binding;GO:1901363;GO:0097159//organic cyclic compound binding	GO:0006464//cellular protein modification process;GO:0044237//cellular metabolic process	gi|947103557|gb|KRH51940.1|;gi|571458793|ref|XP_006581230.1|/0;0/hypothetical protein GLYMA_06G036400 [Glycine max];PREDICTED: mitogen-activated protein kinase kinase kinase YODA-like [Glycine max]
Glyma.07G105700	-	-	-	-	-	-	-	-	-	-	-	-	1.54223	up	5.87577e-05	0.00465643	1.44889	up	0.00610679	0.034024	1376	ko04626//Plant-pathogen interaction	-	GO:0032550;GO:0004672//protein kinase activity;GO:0019887//protein kinase regulator activity	GO:0001934//positive regulation of protein phosphorylation;GO:0006351//transcription, DNA-templated;GO:0002239//response to oomycetes;GO:0009617//response to bacterium;GO:0009692;GO:0009700//indole phytoalexin biosynthetic process;GO:0006970//response to osmotic stress;GO:0000160//phosphorelay signal transduction system;GO:0060918//auxin transport;GO:0009627//systemic acquired resistance	gi|356520673|ref|XP_003528985.1|/0/PREDICTED: mitogen-activated protein kinase kinase 9 [Glycine max]
Glyma.03G054100	-	-	-	-	-	-	-	-	-	-	-	-	-	-	-	-	1.44814	up	0.00480669	0.0287673	3425	ko00230//Purine metabolism;ko00240//Pyrimidine metabolism;ko01100//Metabolic pathways;ko03020//RNA polymerase;ko04626//Plant-pathogen interaction	-	GO:0036094//small molecule binding;GO:1901363;GO:0097159//organic cyclic compound binding	-	gi|947117426|gb|KRH65675.1|;gi|947117424|gb|KRH65673.1|;gi|947117423|gb|KRH65672.1|;gi|947117427|gb|KRH65676.1|;gi|947117425|gb|KRH65674.1|/4.13447e-155;0;0;0;0/hypothetical protein GLYMA_03G054100 [Glycine max];hypothetical protein GLYMA_03G054100 [Glycine max];hypothetical protein GLYMA_03G054100 [Glycine max];hypothetical protein GLYMA_03G054100 [Glycine max];hypothetical protein GLYMA_03G0541…
Glyma.10G009100	-	-	-	-	-	-	-	-	-	-	-	-	-	-	-	-	1.44445	up	0.000370424	0.00473124	1920	ko04626//Plant-pathogen interaction	-	GO:0032550;GO:0004702//receptor signaling protein serine/threonine kinase activity	GO:0035556//intracellular signal transduction;GO:0032147//activation of protein kinase activity	gi|359811321|ref|NP_001241285.1|/0/pto-interacting protein 1-like [Glycine max]
Glyma.06G319700	-	-	-	-	-	-	-	-	-	-	-	-	-	-	-	-	1.42848	up	0.00686753	0.0368382	2068	ko04626//Plant-pathogen interaction	GO:0005618//cell wall;GO:0009536//plastid	GO:0016491//oxidoreductase activity	GO:0009628//response to abiotic stimulus;GO:0008152//metabolic process	gi|351724553|ref|NP_001235526.1|/0/disease resistance protein/LRR protein-related protein precursor [Glycine max]
Glyma.03G043500	-	-	-	-	-	-	-	-	-	-	-	-	-	-	-	-	1.40762	up	0.00445047	0.0272917	5300	ko00230//Purine metabolism;ko00240//Pyrimidine metabolism;ko01100//Metabolic pathways;ko03020//RNA polymerase;ko04626//Plant-pathogen interaction	-	-	-	gi|955310855|ref|XP_014628981.1|/0/PREDICTED: putative disease resistance protein At3g14460 [Glycine max]
Glyma.06G153200	-	-	-	-	-	-	-	-	-	-	-	-	-	-	-	-	1.40116	up	3.15678e-05	0.000822986	2548	ko04626//Plant-pathogen interaction	-	GO:0016301//kinase activity;GO:0032550	GO:0006796//phosphate-containing compound metabolic process;GO:0006464//cellular protein modification process	gi|356516360|ref|XP_003526863.1|/0/PREDICTED: mitogen-activated protein kinase kinase kinase YODA-like [Glycine max]
Glyma.02G000400	-	-	-	-	-	-	-	-	-	-	-	-	-	-	-	-	1.39581	up	0.00148755	0.012493	2481	ko04626//Plant-pathogen interaction	-	GO:0004672//protein kinase activity;GO:0032550	GO:0016310//phosphorylation;GO:0006464//cellular protein modification process;GO:0044036//cell wall macromolecule metabolic process	gi|356499893|ref|XP_003518770.1|/0/PREDICTED: lysM domain receptor-like kinase 4 [Glycine max]
Glyma.09G259100	-	-	-	-	-	-	-	-	-	-	-	-	-	-	-	-	1.37109	up	0.00132455	0.0115598	4213	ko04626//Plant-pathogen interaction	GO:0044424	GO:0004672//protein kinase activity;GO:0019787//ubiquitin-like protein transferase activity;GO:0032550	GO:0032446//protein modification by small protein conjugation	gi|571479402|ref|XP_006587850.1|;gi|356531997|ref|XP_003534561.1|/0;0/PREDICTED: U-box domain-containing protein 33-like isoform X2 [Glycine max];PREDICTED: U-box domain-containing protein 33-like isoform X1 [Glycine max]
Glyma.04G220400	-	-	-	-	-	-	-	-	-	-	-	-	-	-	-	-	1.36427	up	0.0091891	0.0451393	3932	ko04626//Plant-pathogen interaction	GO:0031224//intrinsic component of membrane;GO:0044444	GO:0016301//kinase activity;GO:0032550	GO:0006796//phosphate-containing compound metabolic process;GO:0006464//cellular protein modification process	gi|356509054|ref|XP_003523267.1|/0/PREDICTED: probable inactive receptor kinase At5g10020 [Glycine max]
Glyma.01G218800	-	-	-	-	-	-	-	-	-	-	-	-	-	-	-	-	1.36221	up	0.0100726	0.0482042	3590	ko04075//Plant hormone signal transduction;ko04626//Plant-pathogen interaction	GO:0031224//intrinsic component of membrane	GO:0016301//kinase activity;GO:0032550	GO:0006464//cellular protein modification process	gi|947129672|gb|KRH77526.1|;gi|571436477|ref|XP_006573774.1|/0;0/hypothetical protein GLYMA_01G218800 [Glycine max];PREDICTED: probable LRR receptor-like serine/threonine-protein kinase At1g63430 [Glycine max]
Glyma.02G037100	-	-	-	-	-	-	-	-	-1.15936	down	0.00106856	0.0405455	-	-	-	-	1.35489	up	0.00124892	0.0111117	3167	ko04075//Plant hormone signal transduction;ko04626//Plant-pathogen interaction	GO:0005911//cell-cell junction;GO:0016020//membrane	GO:0004672//protein kinase activity;GO:0032550	GO:0006468//protein phosphorylation;GO:0000302//response to reactive oxygen species	gi|571437782|ref|XP_006574321.1|/0/PREDICTED: protein kinase family protein isoform X1 [Glycine max]
Glyma.06G267400	-	-	-	-	-	-	-	-	-	-	-	-	-	-	-	-	1.35229	up	0.000127086	0.00221419	4506	ko04626//Plant-pathogen interaction	-	GO:0032550	GO:0050896//response to stimulus	gi|947107241|gb|KRH55624.1|;gi|571457908|ref|XP_006580944.1|/0;0/hypothetical protein GLYMA_06G267400 [Glycine max];PREDICTED: uncharacterized protein LOC100500528 isoform X1 [Glycine max]
Glyma.03G037000	-	-	-	-	-	-	-	-	-	-	-	-	-	-	-	-	1.33316	up	0.0031477	0.0215186	4395	ko00230//Purine metabolism;ko00240//Pyrimidine metabolism;ko01100//Metabolic pathways;ko03020//RNA polymerase;ko04626//Plant-pathogen interaction	-	-	-	gi|356506465|ref|XP_003522002.1|/0/PREDICTED: putative disease resistance RPP13-like protein 1 [Glycine max]
Glyma.13G112000	-	-	-	-	-	-	-	-	-	-	-	-	-	-	-	-	1.31771	up	0.00144576	0.0122832	2360	ko04075//Plant hormone signal transduction;ko04626//Plant-pathogen interaction	-	-	-	gi|918463851|gb|ALA09270.1|/0/ZIM transcription factor, partial [Glycine max]
Glyma.01G118800	-	-	-	-	-	-	-	-	-	-	-	-	-	-	-	-	1.31486	up	0.00236028	0.0174172	2442	ko04626//Plant-pathogen interaction	-	-	-	gi|955302776|ref|XP_014630170.1|/0/PREDICTED: probable leucine-rich repeat receptor-like serine/threonine-protein kinase At3g14840 isoform X1 [Glycine max]
Glyma.14G074700	-	-	-	-	-	-	-	-	-	-	-	-	-	-	-	-	1.31383	up	0.00711745	0.0377528	4087	ko04626//Plant-pathogen interaction	-	GO:0016301//kinase activity;GO:0032550	GO:0006464//cellular protein modification process	gi|356552103|ref|XP_003544410.1|/0/PREDICTED: probable LRR receptor-like serine/threonine-protein kinase At2g16250 [Glycine max]
Glyma.08G218600	-	-	-	-	-	-	-	-	-3.56166	down	4.68855e-06	0.000398918	-	-	-	-	1.27268	up	0.00373167	0.0240631	1828	ko04626//Plant-pathogen interaction	-	GO:0001071//nucleic acid binding transcription factor activity;GO:0003677//DNA binding	GO:0098542//defense response to other organism;GO:0006351//transcription, DNA-templated;GO:0010033//response to organic substance;GO:0050789//regulation of biological process;GO:0051707//response to other organism;GO:0009987//cellular process;GO:0065007//biological regulation;GO:0006952//defense response	gi|255637165|gb|ACU18913.1|;gi|947095978|gb|KRH44563.1|;gi|571468821|ref|XP_006584456.1|;gi|947095977|gb|KRH44562.1|/0;6.61464e-70;0;1.08096e-125/unknown [Glycine max];hypothetical protein GLYMA_08G218600 [Glycine max];PREDICTED: transcription factor isoform X1 [Glycine max];hypothetical protein GLYMA_08G218600 [Glycine max]
Glyma.06G145700	-	-	-	-	-	-	-	-	-	-	-	-	-	-	-	-	1.27244	up	0.00790255	0.0406692	2947	ko04626//Plant-pathogen interaction	GO:0009526//plastid envelope	GO:0016740//transferase activity	-	gi|947105396|gb|KRH53779.1|/0/hypothetical protein GLYMA_06G145700 [Glycine max]
Glyma.11G054600	-	-	-	-	-	-	-	-	-	-	-	-	-	-	-	-	1.27213	up	0.00833536	0.0422186	1836	ko04075//Plant hormone signal transduction;ko04712//Circadian rhythm - plant;ko04626//Plant-pathogen interaction	-	-	GO:0007275//multicellular organismal development;GO:0048608//reproductive structure development;GO:0009628//response to abiotic stimulus;GO:0009791//post-embryonic development	gi|734423171|gb|KHN42092.1|;gi|947079665|gb|KRH28454.1|;gi|947079664|gb|KRH28453.1|/0;6.4743e-165;0/Transcription factor SPATULA [Glycine soja];hypothetical protein GLYMA_11G0546001, partial [Glycine max];hypothetical protein GLYMA_11G0546001 [Glycine max]
Glyma.13G266300	-	-	-	-	-	-	-	-	-	-	-	-	-	-	-	-	1.26018	up	0.00725143	0.0382642	3585	ko04075//Plant hormone signal transduction;ko04626//Plant-pathogen interaction	-	GO:0046914//transition metal ion binding;GO:0004672//protein kinase activity;GO:0032550	GO:0006796//phosphate-containing compound metabolic process;GO:0006464//cellular protein modification process	gi|947073017|gb|KRH21908.1|/0/hypothetical protein GLYMA_13G266300 [Glycine max]
Glyma.10G159500	-	-	-	-	-	-	-	-	-	-	-	-	-	-	-	-	1.22398	up	0.000483039	0.00565549	5775	ko04626//Plant-pathogen interaction	-	-	-	gi|571483241|ref|XP_006589174.1|;gi|947085312|gb|KRH34033.1|;gi|571483243|ref|XP_006589175.1|/0;0;0/PREDICTED: protein MON2 homolog isoform X1 [Glycine max];hypothetical protein GLYMA_10G159500 [Glycine max];PREDICTED: protein MON2 homolog isoform X2 [Glycine max]
Glyma.15G001500	-	-	-	-	-	-	-	-	-	-	-	-	-	-	-	-	1.21865	up	0.00162356	0.0133062	3906	ko04626//Plant-pathogen interaction	GO:0031224//intrinsic component of membrane	GO:0032550;GO:0004672//protein kinase activity	GO:0050896//response to stimulus;GO:0006464//cellular protein modification process;GO:0006796//phosphate-containing compound metabolic process	gi|571514319|ref|XP_003546285.2|/0/PREDICTED: receptor-like protein kinase [Glycine max]
Glyma.13G248800	-	-	-	-	-	-	-	-	-	-	-	-	-	-	-	-	1.1914	up	0.00564158	0.0321872	3053	ko04626//Plant-pathogen interaction	-	GO:0004672//protein kinase activity;GO:0032550	GO:0006796//phosphate-containing compound metabolic process;GO:0006464//cellular protein modification process;GO:0008037//cell recognition	gi|571500423|ref|XP_006594639.1|/0/PREDICTED: G-type lectin S-receptor-like serine/threonine-protein kinase B120 isoform X1 [Glycine max]
Glyma.06G223800	-	-	-	-	-	-	-	-	-	-	-	-	-	-	-	-	1.18334	up	0.00203908	0.0156798	2664	ko04626//Plant-pathogen interaction	GO:0031224//intrinsic component of membrane	GO:0005267//potassium channel activity	GO:0034220//ion transmembrane transport;GO:0030001//metal ion transport	gi|571461788|ref|XP_006582102.1|;gi|955325484|ref|XP_014632152.1|/0;0/PREDICTED: probable cyclic nucleotide-gated ion channel 17 isoform X1 [Glycine max];PREDICTED: probable cyclic nucleotide-gated ion channel 17 isoform X2 [Glycine max]
Glyma.05G034600	-	-	-	-	-	-	-	-	-	-	-	-	-	-	-	-	1.1776	up	0.0040248	0.0253963	2410	ko04070//Phosphatidylinositol signaling system;ko04626//Plant-pathogen interaction	-	-	-	gi|571453593|ref|XP_006579554.1|/0/PREDICTED: calmodulin-binding protein 60 A-like isoform X1 [Glycine max]
Glyma.19G140800	-	-	-	-	-	-	-	-	-	-	-	-	-	-	-	-	1.17675	up	0.00578572	0.0327396	2209	ko04626//Plant-pathogen interaction	-	GO:0046872//metal ion binding;GO:0004674//protein serine/threonine kinase activity;GO:0032550	GO:0006796//phosphate-containing compound metabolic process;GO:0006464//cellular protein modification process	gi|356572042|ref|XP_003554179.1|/0/PREDICTED: calcium-dependent protein kinase 32 [Glycine max]
Glyma.13G102000	-	-	-	-	-	-	-	-	-	-	-	-	-	-	-	-	1.16015	up	0.00301609	0.0208928	1764	ko04626//Plant-pathogen interaction	-	GO:0003677//DNA binding;GO:0001071//nucleic acid binding transcription factor activity	GO:0006351//transcription, DNA-templated	gi|947070229|gb|KRH19120.1|/7.85339e-164/hypothetical protein GLYMA_13G102000 [Glycine max]
Glyma.05G010600	-	-	-	-	-	-	-	-	-	-	-	-	-	-	-	-	1.12633	up	0.00748039	0.0391262	2947	ko04626//Plant-pathogen interaction	GO:0031224//intrinsic component of membrane	GO:0005249//voltage-gated potassium channel activity;GO:0005515//protein binding	GO:0010119//regulation of stomatal movement;GO:0048588//developmental cell growth;GO:0006970//response to osmotic stress;GO:0071805//potassium ion transmembrane transport	gi|571454296|ref|XP_003524528.2|/0/PREDICTED: potassium channel AKT1-like [Glycine max]
Glyma.11G232200	-	-	-	-	-	-	-	-	-	-	-	-	-	-	-	-	1.12323	up	0.00569332	0.0324175	2463	ko04626//Plant-pathogen interaction	GO:0031224//intrinsic component of membrane	GO:0016301//kinase activity;GO:0032550	GO:0006796//phosphate-containing compound metabolic process;GO:0006464//cellular protein modification process	gi|356537999|ref|XP_003537493.1|/0/PREDICTED: probable inactive receptor-like protein kinase At3g56050 [Glycine max]
Glyma.02G008500	-	-	-	-	-	-	-	-	-	-	-	-	-	-	-	-	1.09708	up	0.000853683	0.00851028	1853	ko04626//Plant-pathogen interaction	-	GO:0032550;GO:0004702//receptor signaling protein serine/threonine kinase activity	GO:0035556//intracellular signal transduction;GO:0032147//activation of protein kinase activity	gi|571438081|ref|XP_006574465.1|;gi|358248598|ref|NP_001239908.1|/0;0/PREDICTED: pto-interacting protein 1-like isoform X1 [Glycine max];pto-interacting protein 1-like [Glycine max]
Glyma.05G014600	-	-	-	-	-	-	-	-	-	-	-	-	-	-	-	-	1.0923	up	0.00904946	0.0447391	1818	ko04626//Plant-pathogen interaction	-	-	-	gi|734359148|gb|KHN15161.1|/0/Piriformospora indica-insensitive protein 2 [Glycine soja]
Glyma.08G316500	-	-	-	-	-	-	-	-	-	-	-	-	-	-	-	-	1.07526	up	0.00663072	0.035908	2702	ko04626//Plant-pathogen interaction	-	GO:0046872//metal ion binding;GO:0004672//protein kinase activity;GO:0032550	GO:0006796//phosphate-containing compound metabolic process;GO:0006464//cellular protein modification process	gi|214011508|gb|ACJ61504.1|/0/calcium-dependent protein kinase [Glycine max]
Glyma.03G075300	-	-	-	-	-	-	-	-	-	-	-	-	-	-	-	-	1.07027	up	0.00772396	0.0400246	5431	ko04626//Plant-pathogen interaction	-	GO:0032550	GO:0050896//response to stimulus	gi|571444675|ref|XP_006576576.1|/0/PREDICTED: TMV resistance protein N-like isoform X1 [Glycine max]
Glyma.09G215700	-	-	-	-	-	-	-	-	-	-	-	-	-	-	-	-	1.06993	up	0.00208618	0.0159431	2750	ko04075//Plant hormone signal transduction;ko04626//Plant-pathogen interaction	GO:0031224//intrinsic component of membrane	GO:0032550;GO:0004713//protein tyrosine kinase activity	GO:0006468//protein phosphorylation;GO:0071555//cell wall organization;GO:0000902//cell morphogenesis	gi|358248000|ref|NP_001239788.1|;gi|734348233|gb|KHN11811.1|/0;0/LRR receptor-like serine/threonine-protein kinase FEI 1 precursor [Glycine max];LRR receptor-like serine/threonine-protein kinase FEI 1 [Glycine soja]
Glyma.07G151000	-	-	-	-	-	-	-	-	-	-	-	-	-	-	-	-	1.04984	up	0.00622025	0.0344611	2685	ko04626//Plant-pathogen interaction	-	GO:0046872//metal ion binding;GO:0004674//protein serine/threonine kinase activity;GO:0032550	GO:0006796//phosphate-containing compound metabolic process;GO:0006464//cellular protein modification process	gi|356521026|ref|XP_003529159.1|/0/PREDICTED: calcium-dependent protein kinase 13 [Glycine max]
Glyma.08G265200	-	-	-	-	-	-	-	-	-	-	-	-	-	-	-	-	-1.01158	down	0.00326225	0.0220063	1614	ko04626//Plant-pathogen interaction	GO:0044424	GO:0046872//metal ion binding	-	gi|571469172|ref|XP_006584629.1|/1.81094e-167/PREDICTED: uncharacterized protein LOC100820628 isoform X1 [Glycine max]
Glyma.18G166800	-	-	-	-	-	-	-	-	-	-	-	-	-	-	-	-	-1.02012	down	0.00267355	0.0191011	1362	ko04626//Plant-pathogen interaction	-	-	-	gi|351723541|ref|NP_001235235.1|/0/RIN4c protein [Glycine max]
Glyma.17G154500	-	-	-	-	-	-	-	-	-	-	-	-	-	-	-	-	-1.04322	down	0.00577456	0.0326973	1888	ko04626//Plant-pathogen interaction	-	-	-	gi|734314283|gb|KHN01686.1|/0/Leucine-rich repeat-containing protein 40 [Glycine soja]
Glyma.16G049400	-	-	-	-	-	-	-	-	-	-	-	-	-	-	-	-	-1.04388	down	0.00283716	0.0200145	1935	ko04075//Plant hormone signal transduction;ko04626//Plant-pathogen interaction	-	-	-	gi|359806583|ref|NP_001241268.1|;gi|947057436|gb|KRH06842.1|/0;0/transcription factor ICE1-like [Glycine max];hypothetical protein GLYMA_16G049400 [Glycine max]
Glyma.20G222600	-	-	-	-	-	-	-	-	-	-	-	-	1.28669	up	0.000685763	0.0302816	-1.06414	down	0.00474083	0.0285019	1224	ko04626//Plant-pathogen interaction	-	GO:0032550;GO:0004672//protein kinase activity	GO:0009314//response to radiation;GO:0009267//cellular response to starvation;GO:0006464//cellular protein modification process;GO:0010243//response to organonitrogen compound;GO:0006796//phosphate-containing compound metabolic process	gi|351727763|ref|NP_001236660.1|/0/phosphoenolpyruvate carboxylase kinase [Glycine max]
Glyma.19G005700	-	-	-	-	-	-	-	-	-	-	-	-	1.83488	up	0.000508621	0.0246577	-1.08604	down	0.00783727	0.0404427	2512	ko04075//Plant hormone signal transduction;ko04626//Plant-pathogen interaction	-	GO:0004672//protein kinase activity;GO:0032550	GO:0006464//cellular protein modification process	gi|356573321|ref|XP_003554810.1|/0/PREDICTED: cysteine-rich receptor-like protein kinase 42 [Glycine max]
Glyma.09G203000	-	-	-	-	-	-	-	-	-	-	-	-	-1.04225	down	0.00121703	0.0463689	-1.21856	down	0.000521273	0.00599243	1485	ko04075//Plant hormone signal transduction;ko04626//Plant-pathogen interaction	-	GO:0005515//protein binding	-	gi|571475524|ref|XP_006586670.1|;gi|947090855|gb|KRH39520.1|/0;0/PREDICTED: uncharacterized protein LOC100784145 isoform X1 [Glycine max];hypothetical protein GLYMA_09G203000 [Glycine max]
Glyma.02G100000	-	-	-	-	-	-	-	-	-	-	-	-	-	-	-	-	-1.22529	down	0.00325078	0.0219631	2109	ko04626//Plant-pathogen interaction	-	GO:0004672//protein kinase activity;GO:0032550	GO:0006796//phosphate-containing compound metabolic process;GO:0006464//cellular protein modification process;GO:0010109//regulation of photosynthesis;GO:0048511//rhythmic process	gi|356502478|ref|XP_003520046.1|/0/PREDICTED: serine/threonine-protein kinase STN7, chloroplastic-like [Glycine max]
Glyma.14G219700	-	-	-	-	-	-	-	-	-	-	-	-	-	-	-	-	-1.24475	down	0.000238421	0.00347826	3030	ko04141//Protein processing in endoplasmic reticulum;ko04626//Plant-pathogen interaction	GO:0009536//plastid;GO:0044437;GO:0005911//cell-cell junction;GO:0005576//extracellular region;GO:0016020//membrane	GO:0032550;GO:0005515//protein binding	GO:0010038//response to metal ion;GO:0044267//cellular protein metabolic process;GO:0009933//meristem structural organization;GO:0010073//meristem maintenance;GO:0006970//response to osmotic stress;GO:0015031//protein transport	gi|947068301|gb|KRH17444.1|;gi|571512225|ref|XP_006596543.1|;gi|734418176|gb|KHN39421.1|/0;0;0/hypothetical protein GLYMA_14G219700 [Glycine max];PREDICTED: endoplasmin homolog isoform X2 [Glycine max];Endoplasmin like [Glycine soja]
Glyma.12G219000	-	-	-	-	-	-	-	-	-	-	-	-	-	-	-	-	-1.25882	down	0.0014263	0.0121576	2275	ko04626//Plant-pathogen interaction	-	-	-	gi|356542246|ref|XP_003539580.1|/0/PREDICTED: cyclic nucleotide-gated ion channel 4-like [Glycine max]
Glyma.14G040600	-	-	-	-	-	-	-	-	-	-	-	-	-	-	-	-	-1.2752	down	0.000425003	0.00517129	995	ko04070//Phosphatidylinositol signaling system;ko04626//Plant-pathogen interaction	GO:0044437;GO:0016020//membrane	GO:0046872//metal ion binding	GO:0019932//second-messenger-mediated signaling;GO:0006637//acyl-CoA metabolic process;GO:0009640//photomorphogenesis;GO:0009593//detection of chemical stimulus;GO:0009605//response to external stimulus	gi|413945839|gb|AFW78488.1|/1.43783e-104/calmodulin1 [Zea mays]
Glyma.03G240000	-	-	-	-	-	-	-	-	-	-	-	-	-	-	-	-	-1.2762	down	0.000360253	0.00464292	2166	ko04075//Plant hormone signal transduction;ko04626//Plant-pathogen interaction	-	GO:0005515//protein binding	-	gi|947120341|gb|KRH68590.1|;gi|571447011|ref|XP_006577251.1|/0;0/hypothetical protein GLYMA_03G240000 [Glycine max];PREDICTED: transcription factor bHLH94-like [Glycine max]
Glyma.19G216200	-	-	-	-	-	-	-	-	-	-	-	-	-	-	-	-	-1.28098	down	0.000293354	0.00405956	1266	ko04650//Natural killer cell mediated cytotoxicity;ko04075//Plant hormone signal transduction;ko04626//Plant-pathogen interaction	-	GO:0001071//nucleic acid binding transcription factor activity;GO:0003677//DNA binding;GO:0046983//protein dimerization activity	GO:0033554//cellular response to stress;GO:0051240;GO:0006351//transcription, DNA-templated	gi|351721812|ref|NP_001237222.1|/1.50678e-94/bZIP transcription factor bZIP41 [Glycine max]
Glyma.03G170300	-	-	-	-	-	-	-	-	-	-	-	-	-	-	-	-	-1.2884	down	0.00841915	0.0424996	3015	ko04075//Plant hormone signal transduction;ko04712//Circadian rhythm - plant;ko04626//Plant-pathogen interaction	-	GO:0005515//protein binding	-	gi|918463563|gb|ALA09126.1|;gi|947119269|gb|KRH67518.1|/0;0/bHLH transcription factor, partial [Glycine max] ;hypothetical protein GLYMA_03G170300 [Glycine max]
Glyma.17G258700	-	-	-	-	-	-	-	-	-	-	-	-	-	-	-	-	-1.30618	down	8.6843e-05	0.00169084	2887	ko04141//Protein processing in endoplasmic reticulum;ko04626//Plant-pathogen interaction	GO:0009536//plastid;GO:0044437;GO:0005911//cell-cell junction;GO:0005576//extracellular region;GO:0016020//membrane	GO:0032550;GO:0005515//protein binding	GO:0010038//response to metal ion;GO:0044267//cellular protein metabolic process;GO:0009933//meristem structural organization;GO:0010073//meristem maintenance;GO:0006970//response to osmotic stress;GO:0015031//protein transport	gi|571539837|ref|XP_006601356.1|;gi|734351227|gb|KHN12637.1|/0;0/PREDICTED: endoplasmin homolog isoform X2 [Glycine max];Endoplasmin like [Glycine soja]
Glyma.15G100100	-	-	-	-	-	-	-	-	-	-	-	-	-	-	-	-	-1.34872	down	0.000323203	0.00432367	1828	ko04075//Plant hormone signal transduction;ko04626//Plant-pathogen interaction	GO:0042579//microbody	GO:0004672//protein kinase activity;GO:0032550;GO:0036094//small molecule binding;GO:1901363;GO:0097159//organic cyclic compound binding	GO:0006468//protein phosphorylation	gi|947062043|gb|KRH11304.1|;gi|955369108|ref|XP_014623058.1|/4.33873e-143;0/hypothetical protein GLYMA_15G1001002 [Glycine max];PREDICTED: receptor-like cytosolic serine/threonine-protein kinase RBK2 [Glycine max]
Glyma.02G275600	-	-	-	-	-	-	-	-	-	-	-	-	-	-	-	-	-1.3904	down	0.000110195	0.00200694	945	ko04070//Phosphatidylinositol signaling system;ko04626//Plant-pathogen interaction	GO:0044437;GO:0016020//membrane	GO:0046872//metal ion binding	GO:0019932//second-messenger-mediated signaling;GO:0006637//acyl-CoA metabolic process;GO:0009640//photomorphogenesis;GO:0009593//detection of chemical stimulus;GO:0009605//response to external stimulus	gi|413945839|gb|AFW78488.1|/1.43783e-104/calmodulin1 [Zea mays]
Glyma.07G212000	-	-	-	-	-	-	-	-	-	-	-	-	-	-	-	-	-1.41093	down	0.00985119	0.0473964	2030	ko04626//Plant-pathogen interaction	GO:0043231//intracellular membrane-bounded organelle	GO:0046872//metal ion binding	-	gi|574584784|ref|NP_001276189.1|/1.00228e-123/uncharacterized protein LOC100803158 [Glycine max]
Glyma.15G161200	-	-	-	-	-	-	-	-	-	-	-	-	-	-	-	-	-1.42476	down	5.77905e-05	0.00125916	1658	ko04626//Plant-pathogen interaction	-	GO:0004672//protein kinase activity;GO:0032550	GO:0006796//phosphate-containing compound metabolic process;GO:0006464//cellular protein modification process	gi|356556186|ref|XP_003546407.1|/0/PREDICTED: probable receptor-like serine/threonine-protein kinase At5g57670 [Glycine max]
Glyma.02G247900	-	-	-	-	-	-	-	-	-	-	-	-	-	-	-	-	-1.48609	down	0.000283736	0.00395525	1012	ko04626//Plant-pathogen interaction	-	-	-	gi|351721110|ref|NP_001235151.1|;gi|947124831|gb|KRH73037.1|/1.61515e-111;6.5414e-125/uncharacterized protein LOC100500493 [Glycine max];hypothetical protein GLYMA_02G247900 [Glycine max]
Glyma.11G217400	-	-	-	-	-	-	-	-	-	-	-	-	-	-	-	-	-1.49731	down	0.0019013	0.0149426	2085	ko04626//Plant-pathogen interaction	-	GO:0004672//protein kinase activity;GO:0032550	GO:0006464//cellular protein modification process	gi|947082168|gb|KRH30957.1|/0/hypothetical protein GLYMA_11G217400 [Glycine max]
Glyma.16G059700	-	-	-	-	-	-	-	-	-	-	-	-	-	-	-	-	-1.54474	down	0.00117944	0.0106587	3377	ko04626//Plant-pathogen interaction	-	GO:0016301//kinase activity;GO:0032550	GO:0006796//phosphate-containing compound metabolic process;GO:0006464//cellular protein modification process	gi|571526053|ref|XP_006599042.1|;gi|571526049|ref|XP_006599041.1|/0;0/PREDICTED: probable inactive leucine-rich repeat receptor-like protein kinase At3g03770 isoform X2 [Glycine max];PREDICTED: probable inactive leucine-rich repeat receptor-like protein kinase At3g03770 isoform X1 [Glycine max]
Glyma.04G013800	-	-	-	-	-	-	-	-	-	-	-	-	-	-	-	-	-1.54993	down	0.00948963	0.0461452	918	ko04075//Plant hormone signal transduction;ko04626//Plant-pathogen interaction	-	-	-	gi|734405996|gb|KHN33765.1|/8.27238e-149/Protein TIFY 10B [Glycine soja]
Glyma.13G035100	-	-	-	-	-	-	-	-	-	-	-	-	-	-	-	-	-1.63894	down	0.00303966	0.0210199	1130	ko04626//Plant-pathogen interaction	-	-	-	gi|356547218|ref|XP_003542013.1|/4.33954e-91/PREDICTED: probable calcium-binding protein CML44 [Glycine max]
Glyma.16G099600	-	-	-	-	-	-	-	-	-	-	-	-	-	-	-	-	-1.65327	down	5.97093e-05	0.00128458	969	ko04626//Plant-pathogen interaction	-	GO:0046872//metal ion binding;GO:0016628//oxidoreductase activity, acting on the CH-CH group of donors, NAD or NADP as acceptor	GO:0044710	gi|356559132|ref|XP_003547855.1|/8.65453e-114/PREDICTED: probable calcium-binding protein CML16 [Glycine max]
Glyma.13G370100	-	-	-	-	-	-	-	-	-	-	-	-	-	-	-	-	-1.65423	down	0.000191115	0.00299329	1579	ko04626//Plant-pathogen interaction	-	-	-	gi|356550659|ref|XP_003543702.1|/0/PREDICTED: probable WRKY transcription factor 40 [Glycine max]
Glyma.14G185100	-	-	-	-	-	-	-	-	-	-	-	-	-	-	-	-	-1.7714	down	0.00542123	0.0313438	1692	ko04075//Plant hormone signal transduction;ko04626//Plant-pathogen interaction	-	GO:0005515//protein binding	-	gi|734419257|gb|KHN39978.1|/0/Transcription factor bHLH93 [Glycine soja]
Glyma.15G078200	-	-	-	-	-	-	-	-	-	-	-	-	-	-	-	-	-1.77742	down	0.000121887	0.00216008	1808	ko04626//Plant-pathogen interaction	-	GO:0016301//kinase activity;GO:0032550	GO:0006796//phosphate-containing compound metabolic process;GO:0006464//cellular protein modification process	gi|955373512|ref|XP_014623829.1|/0/PREDICTED: serine/threonine-protein kinase-like protein ACR4 [Glycine max]
Glyma.19G181200	-	-	-	-	-	-	-	-	-	-	-	-	-	-	-	-	-1.82181	down	0.000766943	0.00788536	1608	ko04626//Plant-pathogen interaction	-	GO:0004672//protein kinase activity;GO:0032550	GO:0006464//cellular protein modification process	gi|571558485|ref|XP_006604574.1|;gi|947046350|gb|KRG95979.1|;gi|356570752|ref|XP_003553549.1|/0;0;0/PREDICTED: putative serine/threonine-protein kinase isoform X3 [Glycine max];hypothetical protein GLYMA_19G181200 [Glycine max];PREDICTED: putative serine/threonine-protein kinase isoform X1 [Glycine max]
Glyma.13G234800	-	-	-	-	-	-	-	-	-	-	-	-	-	-	-	-	-1.83205	down	0.00259871	0.0187072	1843	ko04626//Plant-pathogen interaction	-	GO:0016301//kinase activity;GO:0032550	GO:0006796//phosphate-containing compound metabolic process;GO:0006464//cellular protein modification process	gi|356549280|ref|XP_003543022.1|/0/PREDICTED: serine/threonine-protein kinase-like protein ACR4 [Glycine max]
Glyma.06G092000	-	-	-	-	-	-	-	-	-	-	-	-	-	-	-	-	-1.97066	down	0.00501057	0.0296345	1587	ko04075//Plant hormone signal transduction;ko04626//Plant-pathogen interaction	-	GO:0005515//protein binding	-	gi|734339619|gb|KHN09034.1|/0/Transcription factor bHLH93 [Glycine soja]
Glyma.14G206500	-	-	-	-	-	-	-	-	-	-	-	-	-	-	-	-	-2.0492	down	0.00723377	0.0382146	4627	ko04626//Plant-pathogen interaction	-	-	-	gi|734398662|gb|KHN30617.1|/0/Disease resistance protein [Glycine soja]
Glyma.06G271200	-	-	-	-	-	-	-	-	-	-	-	-	-	-	-	-	-2.05043	down	0.00562007	0.0321029	2469	ko04626//Plant-pathogen interaction	-	-	-	gi|356515024|ref|XP_003526201.1|/0/PREDICTED: cyclic nucleotide-gated ion channel 4-like [Glycine max]
Glyma.20G185100	-	-	-	-	-	-	-	-	-	-	-	-	-	-	-	-	-2.23797	down	0.000422736	0.00516354	2296	ko04626//Plant-pathogen interaction	-	-	GO:0009608//response to symbiont;GO:0044419//interspecies interaction between organisms	gi|571568702|ref|XP_003556257.2|/0/PREDICTED: piriformospora indica-insensitive protein 2-like [Glycine max]
Glyma.03G148800	-	-	-	-	-	-	-	-	-	-	-	-	-	-	-	-	-2.32385	down	6.40942e-06	0.000249518	2137	ko04075//Plant hormone signal transduction;ko04626//Plant-pathogen interaction	-	GO:0004672//protein kinase activity;GO:0032550	GO:0006464//cellular protein modification process	gi|356504892|ref|XP_003521228.1|/0/PREDICTED: receptor-like cytosolic serine/threonine-protein kinase RBK2 [Glycine max]
Glyma.19G152100	-	-	-	-	-	-	-	-	-	-	-	-	-	-	-	-	-2.43996	down	0.000193465	0.0030185	2285	ko04626//Plant-pathogen interaction	-	GO:0004672//protein kinase activity;GO:0032550	GO:0006464//cellular protein modification process	gi|947045825|gb|KRG95454.1|;gi|356570544|ref|XP_003553445.1|/0;0/hypothetical protein GLYMA_19G152100 [Glycine max];PREDICTED: receptor-like cytosolic serine/threonine-protein kinase RBK2 [Glycine max]
Glyma.18G039400	-	-	-	-	-	-	-	-	-	-	-	-	-	-	-	-	-2.44443	down	1.97741e-05	0.000580224	2076	ko04626//Plant-pathogen interaction	-	GO:0004672//protein kinase activity;GO:0032550	GO:0006464//cellular protein modification process	gi|356569560|ref|XP_003552967.1|/0/PREDICTED: serine/threonine-protein kinase CDL1-like [Glycine max]
Glyma.09G265700	-	-	-	-	-	-	-	-	-	-	-	-	-	-	-	-	-2.47269	down	0.00335849	0.0223698	3737	ko00230//Purine metabolism;ko00240//Pyrimidine metabolism;ko01100//Metabolic pathways;ko03020//RNA polymerase;ko04626//Plant-pathogen interaction	-	-	-	gi|955342818|ref|XP_014617918.1|/0/PREDICTED: putative disease resistance protein RGA4 [Glycine max]
Glyma.13G187600	-	-	-	-	-	-	-	-	-	-	-	-	-3.56594	down	3.23009e-08	6.85657e-06	-2.58464	down	0.00173792	0.0139941	2287	ko04626//Plant-pathogen interaction	-	GO:0004672//protein kinase activity;GO:0032550	GO:0006468//protein phosphorylation	gi|947071700|gb|KRH20591.1|/0/hypothetical protein GLYMA_13G187600 [Glycine max]
Glyma.13G083700	-	-	-	-	-	-	-	-	-	-	-	-	-	-	-	-	-2.70877	down	0.00152691	0.0127392	833	ko04070//Phosphatidylinositol signaling system;ko04626//Plant-pathogen interaction	-	GO:0046872//metal ion binding	-	gi|356548725|ref|XP_003542750.1|/7.13349e-108/PREDICTED: probable calcium-binding protein CML29 [Glycine max]
Glyma.08G271000	-	-	-	-	-	-	-	-	-	-	-	-	-	-	-	-	-3.24912	down	3.5502e-11	1.29814e-08	1909	ko04075//Plant hormone signal transduction;ko04626//Plant-pathogen interaction	-	GO:0005515//protein binding	-	gi|955337298|ref|XP_014634765.1|/0/PREDICTED: transcription factor bHLH71-like isoform X1 [Glycine max]
Glyma.18G271000	-1.67055	down	0.000558524	0.0079747	-1.96063	down	1.60385e-05	0.00159979	-2.02187	down	4.61043e-06	0.00039447	-	-	-	-	-3.41824	down	5.74721e-05	0.00125318	2592	ko04626//Plant-pathogen interaction	-	GO:0004672//protein kinase activity	GO:0006796//phosphate-containing compound metabolic process	gi|571549488|ref|XP_006602953.1|/0/PREDICTED: receptor-like protein kinase FERONIA [Glycine max]
Glyma.17G261000	-	-	-	-	-	-	-	-	-	-	-	-	-	-	-	-	-4.01493	down	7.891e-08	8.68954e-06	1809	ko04626//Plant-pathogen interaction	GO:0043231//intracellular membrane-bounded organelle;GO:0016020//membrane	GO:0046872//metal ion binding;GO:0004674//protein serine/threonine kinase activity;GO:0032550	GO:0006796//phosphate-containing compound metabolic process;GO:0006464//cellular protein modification process	gi|571539899|ref|XP_003549475.2|/0/PREDICTED: calcium-dependent protein kinase 2-like [Glycine max]
Glyma.03G088100	-11.5996	down	1.16162e-58	3.91756e-55	-11.1331	down	1.41978e-39	5.73554e-36	-10.886	down	7.06204e-38	2.69637e-34	-5.55752	down	2.35735e-18	2.00159e-15	-4.25749	down	5.54554e-10	1.41218e-07	4005	ko00230//Purine metabolism;ko00240//Pyrimidine metabolism;ko01100//Metabolic pathways;ko03020//RNA polymerase;ko04626//Plant-pathogen interaction	-	-	GO:0050896//response to stimulus	gi|947117928|gb|KRH66177.1|;gi|571443502|ref|XP_006576200.1|;gi|571443498|ref|XP_006576198.1|/0;0;0/hypothetical protein GLYMA_03G088100 [Glycine max];PREDICTED: uncharacterized LOC100527480 isoform X2 [Glycine max];PREDICTED: uncharacterized LOC100527480 isoform X1 [Glycine max]
Glyma.15G209200	-12.016	down	2.52516e-13	3.73513e-11	-11.8647	down	1.37642e-11	2.8154e-09	-10.6273	down	8.22734e-11	1.54174e-08	-	-	-	-	-4.60619	down	0.0001258	0.00219984	1119	ko04626//Plant-pathogen interaction	-	-	-	gi|947063715|gb|KRH12976.1|/0/hypothetical protein GLYMA_15G209200 [Glycine max]
Glyma.03G088000	-10.3783	down	3.06011e-31	3.3291e-28	-9.51887	down	1.87772e-20	7.98476e-18	-9.46167	down	1.55827e-21	1.53539e-18	-5.23235	down	1.81218e-11	5.43984e-09	-5.2689	down	7.23275e-09	1.1924e-06	3143	ko04626//Plant-pathogen interaction	-	-	-	gi|571444898|ref|XP_006576646.1|;gi|947117926|gb|KRH66175.1|/0;0/PREDICTED: TMV resistance protein N-like isoform X3 [Glycine max];hypothetical protein GLYMA_03G088000 [Glycine max]
Glyma.16G065700	-4.08783	down	2.47292e-10	2.27246e-08	-5.3886	down	3.67597e-12	7.81578e-10	-5.22938	down	2.01675e-13	6.35069e-11	-3.03346	down	2.23101e-06	0.000284269	-8.63866	down	2.4448e-10	6.57813e-08	4096	ko04626//Plant-pathogen interaction	-	GO:0016301//kinase activity	GO:0016310//phosphorylation	gi|955377186|ref|XP_014624710.1|/0/PREDICTED: probable LRR receptor-like serine/threonine-protein kinase At4g08850 [Glycine max]
Glyma.01G010200	-	-	-	-	-	-	-	-	-	-	-	-	-	-	-	-	-1.55595	down	0.00272144	0.0193465	1827	ko01100//Metabolic pathways;ko00710//Carbon fixation in photosynthetic organisms	GO:0009532//plastid stroma;GO:0009526//plastid envelope;GO:0009534//chloroplast thylakoid;GO:0005576//extracellular region	GO:0032550;GO:0016301//kinase activity	GO:0044238//primary metabolic process;GO:0009617//response to bacterium;GO:0006796//phosphate-containing compound metabolic process;GO:0006950//response to stress	gi|356495988|ref|XP_003516852.1|/0/PREDICTED: phosphoribulokinase, chloroplastic [Glycine max]
Glyma.01G153300	-	-	-	-	-	-	-	-	-3.09012	down	0.000161727	0.00896545	-	-	-	-	-	-	-	-	2099	ko00906//Carotenoid biosynthesis	-	GO:0046906//tetrapyrrole binding;GO:0046914//transition metal ion binding;GO:0016709//oxidoreductase activity, acting on paired donors, with incorporation or reduction of molecular oxygen, NAD(P)H as one donor, and incorporation of one atom of oxygen	GO:0010162//seed dormancy process;GO:0009620//response to fungus;GO:0009416//response to light stimulus;GO:0006714//sesquiterpenoid metabolic process;GO:0006950//response to stress	gi|947128604|gb|KRH76458.1|;gi|947128603|gb|KRH76457.1|/0;0/hypothetical protein GLYMA_01G153300 [Glycine max];hypothetical protein GLYMA_01G153300 [Glycine max]
Glyma.01G163100	-	-	-	-	-	-	-	-	-	-	-	-	-	-	-	-	2.47807	up	0.00109494	0.0100738	1698	ko01100//Metabolic pathways;ko01110//Biosynthesis of secondary metabolites;ko00360//Phenylalanine metabolism;ko00940//Phenylpropanoid biosynthesis	-	GO:0003824//catalytic activity;GO:0016209//antioxidant activity;GO:0043169//cation binding;GO:0046906//tetrapyrrole binding	GO:0044710;GO:0006950//response to stress	gi|734411617|gb|KHN36003.1|;gi|947128754|gb|KRH76608.1|/0;0/Peroxidase 64 [Glycine soja] ;hypothetical protein GLYMA_01G163100 [Glycine max]
Glyma.01G171100	-	-	-	-	-	-	-	-	-	-	-	-	-	-	-	-	4.48764	up	0.000164204	0.00267615	1661	ko01100//Metabolic pathways;ko01110//Biosynthesis of secondary metabolites;ko00360//Phenylalanine metabolism;ko00940//Phenylpropanoid biosynthesis	GO:0005618//cell wall	GO:0043169//cation binding;GO:0046906//tetrapyrrole binding;GO:0016209//antioxidant activity;GO:0003824//catalytic activity	GO:0010383;GO:0009699//phenylpropanoid biosynthetic process;GO:0044702//single organism reproductive process;GO:0006950//response to stress	gi|356496705|ref|XP_003517206.1|/0/PREDICTED: peroxidase 72-like [Glycine max]
Glyma.01G203400	-	-	-	-	-	-	-	-	-	-	-	-	-	-	-	-	3.47236	up	0.000561415	0.00636167	2041	ko00500//Starch and sucrose metabolism;ko01100//Metabolic pathways	GO:0009532//plastid stroma	GO:0016160//amylase activity	GO:0006950//response to stress;GO:0005976//polysaccharide metabolic process;GO:0000023//maltose metabolic process	gi|571436239|ref|XP_006573703.1|/0/PREDICTED: beta-amylase 3, chloroplastic [Glycine max]
Glyma.01G214200	-1.65111	down	6.82e-11	7.03e-09	-	-	-	-	-	-	-	-	-	-	-	-	4.63818	up	4.28e-25	9.4e-22	1320	ko00941//Flavonoid biosynthesis;ko01100//Metabolic pathways;ko01110//Biosynthesis of secondary metabolites	-	GO:0016705//oxidoreductase activity, acting on paired donors, with incorporation or reduction of molecular oxygen	GO:0009699//phenylpropanoid biosynthetic process;GO:0006950//response to stress;GO:0001101//response to acid chemical;GO:0006996//organelle organization	gi|358248024|ref|NP_001239794.1|/0/anthocyanidin synthase [Glycine max]
Glyma.01G219400	-1.17376	down	5.77e-07	2.48e-05	-	-	-	-	-	-	-	-	-	-	-	-	-	-	-	-	820	ko00480//Glutathione metabolism;ko00590//Arachidonic acid metabolism	-	GO:0004601//peroxidase activity	GO:0006950//response to stress;GO:0044710	gi|351727154|ref|NP_001236895.1|/8.45814e-121/uncharacterized protein LOC100306570 [Glycine max]
Glyma.02G032300	-1.73065	down	4.2e-07	1.9e-05	-	-	-	-	-	-	-	-	-	-	-	-	-	-	-	-	866	ko04075//Plant hormone signal transduction	-	-	GO:0006950//response to stress	gi|359807353|ref|NP_001241124.1|/1.75331e-109/uncharacterized protein LOC100783267 [Glycine max]
Glyma.02G093000	-	-	-	-	-	-	-	-	-	-	-	-	-	-	-	-	-1.49901	down	0.00924364	0.0453219	1491	-	-	GO:0046983//protein dimerization activity;GO:0004661//protein geranylgeranyltransferase activity	GO:0018342//protein prenylation;GO:0006950//response to stress;GO:0009725//response to hormone;GO:0001101//response to acid chemical	gi|734391396|gb|KHN27225.1|/0/Geranylgeranyl transferase type-1 subunit beta [Glycine soja]
Glyma.02G157900	2.17653	up	4.63e-14	7.8e-12	-	-	-	-	-	-	-	-	-	-	-	-	-	-	-	-	1215	-	GO:0043231//intracellular membrane-bounded organelle	-	GO:0006950//response to stress	gi|947123394|gb|KRH71600.1|;gi|356500303|ref|XP_003518972.1|/1.23787e-86;1.80694e-58/hypothetical protein GLYMA_02G157900 [Glycine max];PREDICTED: uncharacterized protein LOC100527260 [Glycine max]
Glyma.02G224100	-	-	-	-	-	-	-	-	-	-	-	-	-	-	-	-	-1.75234	down	0.000321801	0.00431201	826	-	GO:0031981//nuclear lumen;GO:0009536//plastid;GO:0044437;GO:0000785//chromatin;GO:0005911//cell-cell junction;GO:0016020//membrane	GO:0003676//nucleic acid binding;GO:0046983//protein dimerization activity	GO:0034728//nucleosome organization;GO:0006950//response to stress	gi|475622287|gb|EMT31824.1|/1.35134e-52/Histone H4 [Aegilops tauschii]
Glyma.02G228200	-	-	-	-	-	-	-	-	-	-	-	-	-	-	-	-	2.69927	up	0.0010386	0.00975647	1955	ko04075//Plant hormone signal transduction	GO:0043231//intracellular membrane-bounded organelle	GO:0043169//cation binding;GO:0004721//phosphoprotein phosphatase activity	GO:0009620//response to fungus;GO:0006464//cellular protein modification process;GO:0009755//hormone-mediated signaling pathway;GO:0006950//response to stress	gi|356500878|ref|XP_003519257.1|;gi|947124500|gb|KRH72706.1|/0;9.96677e-128/PREDICTED: probable protein phosphatase 2C 25 [Glycine max];hypothetical protein GLYMA_02G228200 [Glycine max]
Glyma.02G255400	-	-	-	-	-	-	-	-	-	-	-	-	-	-	-	-	2.45564	up	0.00324277	0.021932	2207	-	-	-	GO:0006950//response to stress	gi|947124958|gb|KRH73164.1|/0/hypothetical protein GLYMA_02G255400 [Glycine max]
Glyma.03G056700	-	-	-	-	-	-	-	-	-	-	-	-	-	-	-	-	1.71214	up	0.000417252	0.00511187	2411	ko01040//Biosynthesis of unsaturated fatty acids	GO:0009526//plastid envelope	GO:0016705//oxidoreductase activity, acting on paired donors, with incorporation or reduction of molecular oxygen	GO:0006950//response to stress;GO:0044710;GO:0044238//primary metabolic process	gi|358249324|ref|NP_001239777.1|/0/omega-3 fatty acid desaturase, chloroplastic-like [Glycine max]
Glyma.03G116600	-	-	-	-	-	-	-	-	-	-	-	-	-	-	-	-	-1.22278	down	0.000217417	0.0032671	1885	ko04141//Protein processing in endoplasmic reticulum	-	GO:0043169//cation binding;GO:0005515//protein binding;GO:0032550	GO:0006950//response to stress;GO:0044267//cellular protein metabolic process	gi|734426241|gb|KHN43746.1|/0/Chaperone protein dnaJ 2 [Glycine soja]
Glyma.03G144400	-1.19078	down	0.000170668	0.00306321	-	-	-	-	-	-	-	-	-	-	-	-	-	-	-	-	767	-	-	-	GO:0006950//response to stress;GO:0009791//post-embryonic development	gi|351727178|ref|NP_001236128.1|/1.64464e-90/soybean seed maturation polypeptides [Glycine max]
Glyma.03G253500	-	-	-	-	-	-	-	-	-	-	-	-	-	-	-	-	-1.23549	down	0.00137799	0.0118593	2562	ko00906//Carotenoid biosynthesis;ko01100//Metabolic pathways;ko01110//Biosynthesis of secondary metabolites	GO:0031976;GO:0044436	GO:0016491//oxidoreductase activity	GO:0032787//monocarboxylic acid metabolic process;GO:0006950//response to stress;GO:0006778//porphyrin-containing compound metabolic process;GO:0016122//xanthophyll metabolic process	gi|359807530|ref|NP_001241404.1|;gi|571443623|ref|XP_006576259.1|/0;0/violaxanthin de-epoxidase, chloroplastic-like precursor [Glycine max];PREDICTED: violaxanthin de-epoxidase, chloroplastic-like isoform X5 [Glycine max]
Glyma.04G015900	-	-	-	-	-	-	-	-	-	-	-	-	-	-	-	-	-1.28217	down	0.0076214	0.0396516	1767	ko01100//Metabolic pathways;ko00710//Carbon fixation in photosynthetic organisms	GO:0009521;GO:0031224//intrinsic component of membrane;GO:0009526//plastid envelope;GO:0009534//chloroplast thylakoid;GO:0005576//extracellular region	GO:0016620//oxidoreductase activity, acting on the aldehyde or oxo group of donors, NAD or NADP as acceptor;GO:0000166//nucleotide binding	GO:0009314//response to radiation;GO:0010038//response to metal ion;GO:0019318//hexose metabolic process;GO:0015977//carbon fixation;GO:0034285;GO:0044237//cellular metabolic process;GO:0006950//response to stress	gi|358248146|ref|NP_001240080.1|;gi|947112595|gb|KRH60897.1|/0;0/uncharacterized protein LOC100806482 [Glycine max];hypothetical protein GLYMA_04G015900 [Glycine max]
Glyma.04G042300	-	-	-	-	-	-	-	-	-	-	-	-	-	-	-	-	-1.715	down	8.19e-06	0.000299063	1307	-	-	GO:0003676//nucleic acid binding	GO:0001101//response to acid chemical;GO:0009725//response to hormone;GO:0006950//response to stress	gi|918463735|gb|ALA09212.1|/4.09473e-165/MYB/HD-like transcription factor, partial [Glycine max]
Glyma.04G095500	-	-	-	-	-	-	-	-	-	-	-	-	-	-	-	-	1.02603	up	0.00197783	0.015357	2834	-	GO:0042175//nuclear outer membrane-endoplasmic reticulum membrane network;GO:0043231//intracellular membrane-bounded organelle;GO:0044444	GO:0046914//transition metal ion binding;GO:0032553//ribonucleotide binding;GO:0016653//oxidoreductase activity, acting on NAD(P)H, heme protein as acceptor	GO:0006950//response to stress;GO:0044710;GO:0001101//response to acid chemical	gi|734336550|gb|KHN08276.1|/0/NADPH--cytochrome P450 reductase [Glycine soja]
Glyma.04G103900	-	-	-	-	-	-	-	-	-	-	-	-	-	-	-	-	1.35648	up	0.00552349	0.0317507	1940	-	-	GO:0003676//nucleic acid binding	GO:0009628//response to abiotic stimulus;GO:0006950//response to stress;GO:0006351//transcription, DNA-templated	gi|918463511|gb|ALA09100.1|/6.86589e-168/AP2-EREBP transcription factor, partial [Glycine max]
Glyma.04G171800	-	-	-	-	-	-	-	-	-	-	-	-	-	-	-	-	-2.11045	down	1.72e-07	1.62e-05	1156	-	GO:0031224//intrinsic component of membrane	GO:0005215//transporter activity	GO:0044765;GO:0044763;GO:0009628//response to abiotic stimulus;GO:0006950//response to stress	gi|947115071|gb|KRH63373.1|/0/hypothetical protein GLYMA_04G171800 [Glycine max]
Glyma.04G198200	-2.66776	down	5.29e-07	2.3e-05	-3.36578	down	6.42e-11	1.19e-08	-2.74103	down	3.18e-05	0.00218156	-3.0729	down	1.59e-07	2.88e-05	-4.87111	down	1.08e-13	7.52e-11	1469	-	-	-	GO:0006950//response to stress	gi|955317145|ref|XP_014630314.1|;gi|571451376|ref|XP_006578711.1|;gi|947115507|gb|KRH63809.1|;gi|947115506|gb|KRH63808.1|/8.85606e-114;9.6204e-126;2.55023e-92;4.98088e-104/PREDICTED: protein TAPETUM DETERMINANT 1-like isoform X2 [Glycine max];PREDICTED: protein TAPETUM DETERMINANT 1-like isoform X1 [Glycine max];hypothetical protein GLYMA_04G198200 [Glycine max];hypothetical protein GLYMA_04G1982…
Glyma.04G234900	-	-	-	-	-	-	-	-	-	-	-	-	-	-	-	-	-1.12826	down	0.000841945	0.00845532	1920	-	GO:0044444	-	GO:0006950//response to stress;GO:0007165//signal transduction	gi|734370890|gb|KHN19500.1|/0/PP2A regulatory subunit TAP46 [Glycine soja]
Glyma.05G055600	2.14597	up	1.57e-22	8.01e-20	1.87087	up	1.7e-07	2.28e-05	1.72717	up	8.21e-09	1.14e-06	1.51907	up	5.33e-05	0.00427761	1.89239	up	0.000185822	0.00293619	2415	-	GO:0044424	-	GO:0010035//response to inorganic substance;GO:0006950//response to stress;GO:0009628//response to abiotic stimulus	gi|356514200|ref|XP_003525794.1|/0/PREDICTED: hsp70-Hsp90 organizing protein 1-like [Glycine max]
Glyma.05G103600	1.14818	up	1.02e-06	4.09e-05	-	-	-	-	-	-	-	-	-	-	-	-	3.03169	up	0.0047817	0.028663	1511	ko01100//Metabolic pathways;ko01110//Biosynthesis of secondary metabolites;ko00360//Phenylalanine metabolism;ko00940//Phenylpropanoid biosynthesis	-	GO:0003824//catalytic activity;GO:0016209//antioxidant activity;GO:0043169//cation binding;GO:0046906//tetrapyrrole binding	GO:0044710;GO:0006950//response to stress	gi|734328591|gb|KHN06005.1|/0/Peroxidase 73 [Glycine soja]
Glyma.05G150100	-	-	-	-	-	-	-	-	-	-	-	-	-	-	-	-	3.25457	up	0.000723801	0.00758395	533	-	-	-	GO:0051707//response to other organism;GO:0001101//response to acid chemical;GO:0009694//jasmonic acid metabolic process;GO:0010243//response to organonitrogen compound;GO:0009755//hormone-mediated signaling pathway;GO:0006950//response to stress;GO:0006984//ER-nucleus signaling pathway	gi|947110493|gb|KRH58819.1|/3.72565e-46/hypothetical protein GLYMA_05G150100 [Glycine max]
Glyma.05G192800	1.11757	up	1.37e-06	5.31e-05	1.20541	up	0.000286709	0.0209162	1.06995	up	0.00074105	0.0307964	-	-	-	-	-	-	-	-	1167	-	-	-	GO:0006950//response to stress;GO:0010118//stomatal movement	gi|571453058|ref|XP_006579344.1|/3.27039e-180/PREDICTED: uncharacterized protein LOC100305573 isoform X2 [Glycine max]
Glyma.05G193500	-1.06482	down	7.82e-06	0.000246061	-	-	-	-	-	-	-	-	-	-	-	-	-	-	-	-	1538	-	-	GO:0046914//transition metal ion binding;GO:0003824//catalytic activity	GO:0009617//response to bacterium;GO:0006950//response to stress;GO:0009755//hormone-mediated signaling pathway;GO:0032446//protein modification by small protein conjugation	gi|734406748|gb|KHN34095.1|/0/E3 ubiquitin-protein ligase RGLG1 [Glycine soja]
Glyma.05G195000	-	-	-	-	-	-	-	-	-2.63878	down	0.000905081	0.0361003	-	-	-	-	3.46722	up	1.71e-05	0.000522925	1488	-	GO:0009536//plastid	GO:0003676//nucleic acid binding;GO:0019901//protein kinase binding	GO:0009314//response to radiation;GO:0051707//response to other organism;GO:0001101//response to acid chemical;GO:0032535//regulation of cellular component size;GO:0034285;GO:0006950//response to stress;GO:0006351//transcription, DNA-templated	gi|959092818|ref|NP_001304649.1|/0/NAC domain-containing protein 2 [Glycine max]
Glyma.05G211700	-	-	-	-	-2.13037	down	2.36e-05	0.0022202	-4.85706	down	1.97e-08	2.56e-06	-	-	-	-	-	-	-	-	2131	ko00270//Cysteine and methionine metabolism;ko01100//Metabolic pathways;ko01110//Biosynthesis of secondary metabolites	-	GO:0043168//anion binding;GO:0005515//protein binding;GO:0016846//carbon-sulfur lyase activity	GO:0001101//response to acid chemical;GO:0010039//response to iron ion;GO:0009692;GO:0009725//response to hormone;GO:0018871;GO:0003006//developmental process involved in reproduction;GO:0006950//response to stress;GO:0009605//response to external stimulus	gi|351726068|ref|NP_001236858.1|/0/1-aminocyclopropane-1-carboxylate synthase [Glycine max]
Glyma.06G002000	-	-	-	-	-	-	-	-	-	-	-	-	-	-	-	-	1.70251	up	2.14e-05	0.000613067	2049	-	GO:0031224//intrinsic component of membrane	GO:0005515//protein binding	GO:0006950//response to stress	gi|356517840|ref|XP_003527594.1|/0/PREDICTED: MLO-like protein 1 [Glycine max]
Glyma.06G034600	-	-	-	-	-	-	-	-	-	-	-	-	-	-	-	-	2.10368	up	0.00782789	0.0404089	1909	ko00500//Starch and sucrose metabolism;ko01110//Biosynthesis of secondary metabolites;ko00520//Amino sugar and nucleotide sugar metabolism	-	GO:0016740//transferase activity	GO:0003002//regionalization;GO:0042545//cell wall modification;GO:0006950//response to stress;GO:0048827//phyllome development;GO:0000003//reproduction;GO:0010413//glucuronoxylan metabolic process	gi|356519066|ref|XP_003528195.1|/0/PREDICTED: probable galacturonosyltransferase-like 1 [Glycine max]
Glyma.06G058500	-	-	-	-	-	-	-	-	-	-	-	-	1.45219	up	0.000120463	0.00827456	-	-	-	-	1998	ko00062//Fatty acid elongation;ko01110//Biosynthesis of secondary metabolites	GO:0043231//intracellular membrane-bounded organelle	GO:0016746//transferase activity, transferring acyl groups	GO:0009314//response to radiation;GO:0006950//response to stress;GO:0006631//fatty acid metabolic process	gi|356514790|ref|XP_003526086.1|/0/PREDICTED: 3-ketoacyl-CoA synthase 10-like [Glycine max]
Glyma.06G114400	-	-	-	-	-	-	-	-	-	-	-	-	-	-	-	-	1.75694	up	0.00524907	0.0305506	1499	ko00053//Ascorbate and aldarate metabolism;ko00480//Glutathione metabolism	GO:0031976	GO:0046906//tetrapyrrole binding;GO:0016209//antioxidant activity	GO:0009409//response to cold;GO:0007165//signal transduction;GO:0044710;GO:0006950//response to stress;GO:0044699;GO:0050896//response to stimulus	gi|947104871|gb|KRH53254.1|;gi|356515910|ref|XP_003526640.1|;gi|947104870|gb|KRH53253.1|/9.09605e-131;0;0/hypothetical protein GLYMA_06G114400 [Glycine max];PREDICTED: probable L-ascorbate peroxidase 6, chloroplastic isoform X1 [Glycine max];hypothetical protein GLYMA_06G114400 [Glycine max]
Glyma.06G146200	-	-	-	-	-	-	-	-	-	-	-	-	-	-	-	-	2.64031	up	0.00345628	0.0228398	669	-	-	GO:0016462//pyrophosphatase activity;GO:0032550	GO:0006950//response to stress;GO:0007154//cell communication	gi|947105410|gb|KRH53793.1|/2.22017e-164/hypothetical protein GLYMA_06G146200 [Glycine max]
Glyma.06G157400	-	-	-	-	-	-	-	-	-3.14909	down	8.92e-05	0.00540795	-	-	-	-	-	-	-	-	1609	-	GO:0009536//plastid	GO:0003676//nucleic acid binding;GO:0019901//protein kinase binding	GO:0009314//response to radiation;GO:0051707//response to other organism;GO:0001101//response to acid chemical;GO:0032535//regulation of cellular component size;GO:0034285;GO:0006950//response to stress;GO:0006351//transcription, DNA-templated	gi|513044651|gb|AGO14648.1|;gi|947105577|gb|KRH53960.1|/0;0/NAC transcription factor [Glycine max];hypothetical protein GLYMA_06G157400 [Glycine max]
Glyma.06G160300	-	-	-	-	-	-	-	-	-	-	-	-	-	-	-	-	-1.8168	down	0.000128931	0.00223949	584	-	-	-	GO:0001906//cell killing;GO:0006950//response to stress;GO:0009620//response to fungus	gi|947105631|gb|KRH54014.1|/2.52264e-26/hypothetical protein GLYMA_06G160300 [Glycine max]
Glyma.06G160400	-	-	-	-	-	-	-	-	-	-	-	-	-	-	-	-	4.86255	up	6.53e-05	0.00136511	642	-	-	-	GO:0006950//response to stress	gi|734341038|gb|KHN09676.1|/1.27287e-30/Defensin-like protein 6 [Glycine soja]
Glyma.06G167300	1.65043	up	1.31e-05	0.000380487	-	-	-	-	-	-	-	-	-	-	-	-	-	-	-	-	1714	-	-	-	GO:0006950//response to stress	gi|571460950|ref|XP_006581852.1|/1.48014e-100/PREDICTED: protein TAPETUM DETERMINANT 1-like [Glycine max]
Glyma.06G179200	-1.3003	down	0.000100452	0.00200457	-	-	-	-	-	-	-	-	-	-	-	-	-	-	-	-	2618	ko00052//Galactose metabolism	GO:0009536//plastid	GO:0008378//galactosyltransferase activity	GO:0006950//response to stress;GO:0001101//response to acid chemical;GO:0044238//primary metabolic process	gi|571461147|ref|XP_003527005.2|;gi|571461149|ref|XP_006581911.1|/0;0/PREDICTED: galactinol--sucrose galactosyltransferase isoform X1 [Glycine max];PREDICTED: galactinol--sucrose galactosyltransferase isoform X2 [Glycine max]
Glyma.06G192100	-	-	-	-	-	-	-	-	-3.05593	down	3.37e-06	0.000301169	-4.48061	down	1.14e-16	7.77e-14	-5.56943	down	3.88e-10	1e-07	1957	-	GO:0031224//intrinsic component of membrane	GO:0005215//transporter activity	GO:0044763;GO:0009628//response to abiotic stimulus;GO:0006950//response to stress	gi|356519052|ref|XP_003528188.1|/0/PREDICTED: organic cation/carnitine transporter 3-like [Glycine max]
Glyma.06G203800	-	-	-	-	-	-	-	-	-	-	-	-	-	-	-	-	1.96284	up	0.000797859	0.00810678	2929	ko03015//mRNA surveillance pathway;ko03040//Spliceosome	GO:0032991//macromolecular complex;GO:0019028//viral capsid	GO:0036094//small molecule binding;GO:0097159//organic cyclic compound binding;GO:0046914//transition metal ion binding;GO:0032550	GO:0006950//response to stress	gi|571461496|ref|XP_006582018.1|;gi|955325195|ref|XP_014632096.1|;gi|571461494|ref|XP_003528224.2|/0;0;0/PREDICTED: glycine-rich cell wall structural protein 1.8-like isoform X2 [Glycine max];PREDICTED: glycine-rich cell wall structural protein 1.8-like isoform X3 [Glycine max];PREDICTED: glycine-rich cell wall structural protein 1.8-like isoform X1 [Glycine max]
Glyma.06G248900	-	-	-	-	-	-	-	-	-3.85862	down	2.79e-05	0.00195111	-	-	-	-	-	-	-	-	1786	-	GO:0043231//intracellular membrane-bounded organelle	GO:0003676//nucleic acid binding	GO:0001101//response to acid chemical;GO:0006950//response to stress;GO:0006351//transcription, DNA-templated	gi|564010296|gb|AHB63576.1|/0/NAC transcription factor [Glycine max]
Glyma.06G309100	-	-	-	-	-	-	-	-	-	-	-	-	-	-	-	-	-1.24453	down	0.00242212	0.0177383	1565	-	GO:0043231//intracellular membrane-bounded organelle	-	GO:0006950//response to stress	gi|571457925|ref|XP_006580951.1|;gi|351727048|ref|NP_001237915.1|/1.7048e-78;1.30928e-53/PREDICTED: uncharacterized protein LOC100527051 isoform X1 [Glycine max];uncharacterized protein LOC100527051 [Glycine max]
Glyma.07G026300	-	-	-	-	-	-	-	-	-	-	-	-	-	-	-	-	-1.04383	down	0.00349587	0.0230108	1418	ko01100//Metabolic pathways;ko01110//Biosynthesis of secondary metabolites;ko00940//Phenylpropanoid biosynthesis	-	GO:0048037//cofactor binding	GO:0008152//metabolic process;GO:0006950//response to stress;GO:0010038//response to metal ion;GO:0001101//response to acid chemical	gi|734313393|gb|KHN01290.1|/0/Dihydroflavonol-4-reductase [Glycine soja]
Glyma.07G151300	-	-	-	-	-	-	-	-	-	-	-	-	-	-	-	-	1.40593	up	0.00181459	0.0144564	2130	ko01040//Biosynthesis of unsaturated fatty acids	GO:0009941//chloroplast envelope	GO:0016705//oxidoreductase activity, acting on paired donors, with incorporation or reduction of molecular oxygen	GO:0006633//fatty acid biosynthetic process;GO:0006950//response to stress	gi|734428355|gb|KHN44706.1|/0/Omega-3 fatty acid desaturase, chloroplastic [Glycine soja]
Glyma.07G152900	-	-	-	-	-	-	-	-	-	-	-	-	-	-	-	-	-1.52427	down	5.53e-06	0.000223734	2549	ko04141//Protein processing in endoplasmic reticulum	GO:0005911//cell-cell junction;GO:0044432	GO:0003824//catalytic activity	GO:0006950//response to stress;GO:0000904//cell morphogenesis involved in differentiation;GO:0044710	gi|356523332|ref|XP_003530294.1|;gi|947100925|gb|KRH49417.1|/0;0/PREDICTED: dnaJ protein ERDJ3A-like [Glycine max];hypothetical protein GLYMA_07G152900 [Glycine max]
Glyma.07G153100	-	-	-	-	-	-	-	-	-	-	-	-	-	-	-	-	1.84364	up	1.86e-07	1.71e-05	2322	ko00010//Glycolysis / Gluconeogenesis;ko01100//Metabolic pathways;ko01110//Biosynthesis of secondary metabolites	GO:0044444	GO:0046872//metal ion binding;GO:0019842//vitamin binding	GO:0006950//response to stress	gi|356521044|ref|XP_003529168.1|/0/PREDICTED: pyruvate decarboxylase 2 [Glycine max]
Glyma.07G252100	-	-	-	-	-	-	-	-	-	-	-	-	-	-	-	-	1.43578	up	0.000286981	0.00398879	12033	-	-	GO:0017111//nucleoside-triphosphatase activity;GO:0032550;GO:0003676//nucleic acid binding	GO:0048731//system development;GO:0009755//hormone-mediated signaling pathway;GO:0009966//regulation of signal transduction;GO:0008152//metabolic process;GO:0006950//response to stress	gi|571467801|ref|XP_006584045.1|/0/PREDICTED: chromatin structure-remodeling complex protein SYD-like isoform X1 [Glycine max]
Glyma.07G266200	-	-	-	-	-	-	-	-	-	-	-	-	-	-	-	-	2.87174	up	0.00144026	0.0122474	1525	ko00562//Inositol phosphate metabolism;ko00053//Ascorbate and aldarate metabolism;ko04070//Phosphatidylinositol signaling system;ko01100//Metabolic pathways;ko01110//Biosynthesis of secondary metabolites	GO:0044444;GO:0016020//membrane	GO:0070456	GO:0019852//L-ascorbic acid metabolic process;GO:0046488//phosphatidylinositol metabolic process;GO:0009628//response to abiotic stimulus;GO:0006950//response to stress	gi|734423661|gb|KHN42287.1|;gi|947102679|gb|KRH51171.1|/0;0/Inositol monophosphatase 3 [Glycine soja] ;hypothetical protein GLYMA_07G266200 [Glycine max]
Glyma.07G273800	-	-	-	-	-	-	-	-	-	-	-	-	-	-	-	-	1.5463	up	0.00852077	0.0428788	3844	ko00562//Inositol phosphate metabolism;ko04070//Phosphatidylinositol signaling system;ko01100//Metabolic pathways	-	GO:0046030//inositol trisphosphate phosphatase activity	GO:0009888//tissue development;GO:0001101//response to acid chemical;GO:0046488//phosphatidylinositol metabolic process;GO:0009416//response to light stimulus;GO:0031667//response to nutrient levels;GO:0009756//carbohydrate mediated signaling;GO:0048878//chemical homeostasis;GO:0044723;GO:0022622//root system development;GO:0006950//response to stress	gi|571468135|ref|XP_006584139.1|/0/PREDICTED: type I inositol polyphosphate 5-phosphatase 12-like isoform X2 [Glycine max]
Glyma.08G003900	-	-	-	-	-	-	-	-	-	-	-	-	-	-	-	-	7.60589	up	7.09e-06	0.000270155	2090	ko00564//Glycerophospholipid metabolism;ko04070//Phosphatidylinositol signaling system;ko00561//Glycerolipid metabolism;ko01100//Metabolic pathways	-	GO:0016301//kinase activity	GO:0006796//phosphate-containing compound metabolic process;GO:0006950//response to stress;GO:0048827//phyllome development;GO:0007186//G-protein coupled receptor signaling pathway;GO:0022622//root system development	gi|734363861|gb|KHN16922.1|/5.93051e-137/Diacylglycerol kinase 1 [Glycine soja]
Glyma.08G018000	-	-	-	-	-	-	-	-	-3.57998	down	2.36e-05	0.00169104	-	-	-	-	2.58475	up	0.0100219	0.0480386	2236	ko00270//Cysteine and methionine metabolism;ko01100//Metabolic pathways;ko01110//Biosynthesis of secondary metabolites	-	GO:0043168//anion binding;GO:0005515//protein binding;GO:0016846//carbon-sulfur lyase activity	GO:0001101//response to acid chemical;GO:0010039//response to iron ion;GO:0009692;GO:0009725//response to hormone;GO:0018871;GO:0003006//developmental process involved in reproduction;GO:0006950//response to stress;GO:0009605//response to external stimulus	gi|947092656|gb|KRH41241.1|/0/hypothetical protein GLYMA_08G018000 [Glycine max]
Glyma.08G165500	-	-	-	-	-	-	-	-	-	-	-	-	-	-	-	-	-1.14407	down	0.000850041	0.00850071	1946	ko00010//Glycolysis / Gluconeogenesis;ko01100//Metabolic pathways;ko01110//Biosynthesis of secondary metabolites;ko00710//Carbon fixation in photosynthetic organisms	GO:0030312//external encapsulating structure;GO:0009532//plastid stroma;GO:0009526//plastid envelope;GO:0005576//extracellular region	GO:0032550;GO:0016301//kinase activity	GO:0010038//response to metal ion;GO:0006091//generation of precursor metabolites and energy;GO:0006796//phosphate-containing compound metabolic process;GO:0006950//response to stress	gi|356525742|ref|XP_003531482.1|/0/PREDICTED: phosphoglycerate kinase, cytosolic [Glycine max]
Glyma.08G181500	-	-	-	-	-	-	-	-	-	-	-	-	-	-	-	-	1.45236	up	0.00428639	0.0266054	1365	ko01100//Metabolic pathways;ko01110//Biosynthesis of secondary metabolites;ko00360//Phenylalanine metabolism;ko00940//Phenylpropanoid biosynthesis	-	GO:0003824//catalytic activity;GO:0016209//antioxidant activity;GO:0043169//cation binding;GO:0046906//tetrapyrrole binding	GO:0044710;GO:0006950//response to stress	gi|571471963|ref|XP_006585454.1|/0/PREDICTED: peroxidase 43-like [Glycine max]
Glyma.08G196800	-	-	-	-	-	-	-	-	-	-	-	-	-	-	-	-	1.92843	up	2.28e-05	0.000645297	1631	-	GO:0016020//membrane	GO:0010178//IAA-amino acid conjugate hydrolase activity	GO:0002831;GO:0006950//response to stress	gi|734347256|gb|KHN11319.1|;gi|947095629|gb|KRH44214.1|/0;0/IAA-amino acid hydrolase ILR1-like 4 [Glycine soja] ;hypothetical protein GLYMA_08G196800 [Glycine max]
Glyma.08G230500	-	-	-	-	-	-	-	-	-	-	-	-	-	-	-	-	10.4957	up	1.5e-13	9.98e-11	790	-	-	-	GO:0006950//response to stress	gi|351726098|ref|NP_001236859.1|/1.45163e-110/uncharacterized protein LOC100499848 [Glycine max]
Glyma.08G346700	3.14144	up	1.95e-49	4.7e-46	2.80158	up	9.56e-17	2.97e-14	2.41662	up	2.6e-14	9.25e-12	1.91113	up	4.83e-08	9.96e-06	2.85661	up	6.6e-10	1.62e-07	2216	-	GO:0043231//intracellular membrane-bounded organelle;GO:0044444	GO:0016859//cis-trans isomerase activity;GO:1902936	GO:0044707;GO:0018208//peptidyl-proline modification;GO:0006950//response to stress;GO:0010038//response to metal ion	gi|955338317|ref|XP_014634970.1|/0/PREDICTED: peptidyl-prolyl cis-trans isomerase FKBP62-like [Glycine max]
Glyma.09G011100	-	-	-	-	-	-	-	-	-	-	-	-	-	-	-	-	-1.50689	down	0.00123266	0.0110036	1825	ko00562//Inositol phosphate metabolism;ko00053//Ascorbate and aldarate metabolism;ko04070//Phosphatidylinositol signaling system;ko01100//Metabolic pathways;ko01110//Biosynthesis of secondary metabolites	GO:0044444;GO:0016020//membrane	GO:0070456	GO:0019852//L-ascorbic acid metabolic process;GO:0046488//phosphatidylinositol metabolic process;GO:0009628//response to abiotic stimulus;GO:0006950//response to stress	gi|734420434|gb|KHN40821.1|;gi|947087895|gb|KRH36560.1|/0;4.89277e-157/Inositol monophosphatase 3 [Glycine soja] ;hypothetical protein GLYMA_09G011100 [Glycine max]
Glyma.09G022300	-2.80981	down	1.83e-20	7.01e-18	-	-	-	-	-	-	-	-	-	-	-	-	-	-	-	-	1289	ko01100//Metabolic pathways;ko01110//Biosynthesis of secondary metabolites;ko00360//Phenylalanine metabolism;ko00940//Phenylpropanoid biosynthesis	-	GO:0003824//catalytic activity;GO:0016209//antioxidant activity;GO:0043169//cation binding;GO:0046906//tetrapyrrole binding	GO:0044710;GO:0006950//response to stress	gi|351723793|ref|NP_001238315.1|/0/peroxidase precursor [Glycine max]
Glyma.09G022400	-	-	-	-	-	-	-	-	-	-	-	-	-	-	-	-	2.90683	up	0.000753552	0.00779545	1409	ko01100//Metabolic pathways;ko01110//Biosynthesis of secondary metabolites;ko00360//Phenylalanine metabolism;ko00940//Phenylpropanoid biosynthesis	-	GO:0003824//catalytic activity;GO:0016209//antioxidant activity;GO:0043169//cation binding;GO:0046906//tetrapyrrole binding	GO:0044710;GO:0006950//response to stress	gi|255637517|gb|ACU19085.1|/0/unknown [Glycine max]
Glyma.09G023000	-	-	-	-	-	-	-	-	-	-	-	-	-	-	-	-	8.80154	up	1.13e-05	0.000380546	1449	ko01100//Metabolic pathways;ko01110//Biosynthesis of secondary metabolites;ko00360//Phenylalanine metabolism;ko00940//Phenylpropanoid biosynthesis	-	GO:0003824//catalytic activity;GO:0016209//antioxidant activity;GO:0043169//cation binding;GO:0046906//tetrapyrrole binding	GO:0044710;GO:0006950//response to stress	gi|734380812|gb|KHN22992.1|/0/Peroxidase C3 [Glycine soja]
Glyma.09G040600	-	-	-	-	-	-	-	-	-	-	-	-	-	-	-	-	8.06853	up	4.5e-05	0.0010443	936	-	-	GO:0003824//catalytic activity	GO:0006950//response to stress	gi|351726932|ref|NP_001237911.1|/1.98544e-110/uncharacterized protein LOC100305867 [Glycine max]
Glyma.09G048400	-5.55809	down	2.27e-17	5.76e-15	-	-	-	-	-	-	-	-	-	-	-	-	-	-	-	-	945	ko01100//Metabolic pathways;ko01110//Biosynthesis of secondary metabolites;ko00360//Phenylalanine metabolism;ko00940//Phenylpropanoid biosynthesis	-	GO:0003824//catalytic activity;GO:0016209//antioxidant activity;GO:0043169//cation binding;GO:0046906//tetrapyrrole binding	GO:0044710;GO:0006950//response to stress	gi|947088498|gb|KRH37163.1|/0/hypothetical protein GLYMA_09G048400 [Glycine max]
Glyma.09G056300	-	-	-	-	-	-	-	-	-	-	-	-	-	-	-	-	1.39593	up	0.00325041	0.0219631	3594	ko00190//Oxidative phosphorylation	GO:0031224//intrinsic component of membrane;GO:0005911//cell-cell junction;GO:0043231//intracellular membrane-bounded organelle	GO:0032550;GO:0017111//nucleoside-triphosphatase activity;GO:0043169//cation binding;GO:0008324//cation transmembrane transporter activity;GO:0046872//metal ion binding	GO:0009152//purine ribonucleotide biosynthetic process;GO:0006970//response to osmotic stress;GO:0009154//purine ribonucleotide catabolic process;GO:0006811//ion transport;GO:0015988//energy coupled proton transmembrane transport, against electrochemical gradient;GO:0010118//stomatal movement;GO:0001101//response to acid chemical;GO:0006950//response to stress	gi|571476496|ref|XP_006586984.1|;gi|947088618|gb|KRH37283.1|/0;0/PREDICTED: plasma membrane ATPase 4-like [Glycine max];hypothetical protein GLYMA_09G056300 [Glycine max]
Glyma.09G195800	-	-	-	-	-	-	-	-	-	-	-	-	-	-	-	-	1.1164	up	0.00922287	0.0452677	1663	-	-	GO:0004721//phosphoprotein phosphatase activity	GO:0006796//phosphate-containing compound metabolic process;GO:0006950//response to stress;GO:0030522//intracellular receptor signaling pathway	gi|947090724|gb|KRH39389.1|;gi|356531319|ref|XP_003534225.1|/0;0/hypothetical protein GLYMA_09G195800 [Glycine max];PREDICTED: serine/threonine-protein phosphatase 7-like [Glycine max]
Glyma.09G197000	-	-	-	-	-	-	-	-	-	-	-	-	-	-	-	-	1.23284	up	0.00143192	0.0121946	3119	ko04141//Protein processing in endoplasmic reticulum	-	GO:0032550;GO:0004672//protein kinase activity;GO:0004518//nuclease activity	GO:0090501//RNA phosphodiester bond hydrolysis;GO:0006396//RNA processing;GO:0006468//protein phosphorylation;GO:0030968//endoplasmic reticulum unfolded protein response;GO:0010033//response to organic substance;GO:0006950//response to stress	gi|571478408|ref|XP_003533406.2|;gi|947090746|gb|KRH39411.1|/0;0/PREDICTED: serine/threonine-protein kinase/endoribonuclease IRE1a-like isoform X1 [Glycine max];hypothetical protein GLYMA_09G197000 [Glycine max]
Glyma.09G202000	1.15195	up	0.00335159	0.0308743	-	-	-	-	-	-	-	-	-	-	-	-	-	-	-	-	1905	ko00630//Glyoxylate and dicarboxylate metabolism;ko01100//Metabolic pathways;ko01110//Biosynthesis of secondary metabolites;ko00460//Cyanoamino acid metabolism;ko00670//One carbon pool by folate;ko00260//Glycine, serine and threonine metabolism	GO:0005840//ribosome;GO:0009532//plastid stroma;GO:0009526//plastid envelope;GO:0031976;GO:0005576//extracellular region;GO:0016020//membrane	GO:0008187//poly-pyrimidine tract binding;GO:0043168//anion binding;GO:0016742//hydroxymethyl-, formyl- and related transferase activity	GO:0009314//response to radiation;GO:0010038//response to metal ion;GO:0009069//serine family amino acid metabolic process;GO:0006730//one-carbon metabolic process;GO:0048511//rhythmic process;GO:0043094//cellular metabolic compound salvage;GO:0006950//response to stress	gi|734417401|gb|KHN38901.1|;gi|947090836|gb|KRH39501.1|;gi|947090837|gb|KRH39502.1|/0;0;0/Serine hydroxymethyltransferase, mitochondrial [Glycine soja];hypothetical protein GLYMA_09G202000 [Glycine max];hypothetical protein GLYMA_09G202000 [Glycine max]
Glyma.09G210900	-	-	-	-	-	-	-	-	-	-	-	-	-	-	-	-	-1.25043	down	0.00378039	0.0243003	1894	ko01100//Metabolic pathways;ko00710//Carbon fixation in photosynthetic organisms	GO:0009532//plastid stroma;GO:0009526//plastid envelope;GO:0009534//chloroplast thylakoid;GO:0005576//extracellular region	GO:0032550;GO:0016301//kinase activity	GO:0044238//primary metabolic process;GO:0009617//response to bacterium;GO:0006796//phosphate-containing compound metabolic process;GO:0006950//response to stress	gi|356495988|ref|XP_003516852.1|/0/PREDICTED: phosphoribulokinase, chloroplastic [Glycine max]
Glyma.09G218600	-	-	-	-	-	-	-	-	-	-	-	-	-	-	-	-	2.90812	up	0.000853485	0.00851028	2072	ko00906//Carotenoid biosynthesis	-	GO:0046906//tetrapyrrole binding;GO:0046914//transition metal ion binding;GO:0016709//oxidoreductase activity, acting on paired donors, with incorporation or reduction of molecular oxygen, NAD(P)H as one donor, and incorporation of one atom of oxygen;GO:0016491//oxidoreductase activity	GO:0010162//seed dormancy process;GO:0009620//response to fungus;GO:0009416//response to light stimulus;GO:0006714//sesquiterpenoid metabolic process;GO:0006950//response to stress;GO:0044710	gi|734348207|gb|KHN11785.1|;gi|947091113|gb|KRH39778.1|;gi|947091114|gb|KRH39779.1|;gi|947091112|gb|KRH39777.1|;gi|947091110|gb|KRH39775.1|/0;0;0;0;0/Abscisic acid 8'-hydroxylase 1 [Glycine soja] ;hypothetical protein GLYMA_09G218600 [Glycine max];hypothetical protein GLYMA_09G218600 [Glycine max];hypothetical protein GLYMA_09G218600 [Glycine max];hypothetical protein GLYMA_09G218600 [Glycine max]
Glyma.10G001700	-	-	-	-	-	-	-	-	-	-	-	-	-	-	-	-	1.83199	up	0.00105863	0.00985736	1812	ko04140//Regulation of autophagy	-	GO:0004672//protein kinase activity;GO:0032550	GO:0006796//phosphate-containing compound metabolic process;GO:0006950//response to stress;GO:0006464//cellular protein modification process;GO:0007154//cell communication	gi|947082911|gb|KRH31632.1|/0/hypothetical protein GLYMA_10G001700 [Glycine max]
Glyma.10G019000	-	-	-	-	-	-	-	-	-	-	-	-	-	-	-	-	2.03198	up	2.8e-06	0.000131776	6495	ko02010//ABC transporters	GO:0005911//cell-cell junction;GO:0031224//intrinsic component of membrane;GO:0044437	GO:0032550;GO:0017111//nucleoside-triphosphatase activity;GO:0015405;GO:0051183//vitamin transporter activity;GO:0016628//oxidoreductase activity, acting on the CH-CH group of donors, NAD or NADP as acceptor	GO:0006835//dicarboxylic acid transport;GO:0051707//response to other organism;GO:0009154//purine ribonucleotide catabolic process;GO:0006950//response to stress	gi|356536723|ref|XP_003536885.1|/0/PREDICTED: ABC transporter C family member 4-like [Glycine max]
Glyma.10G050800	-	-	-	-	-	-	-	-	-3.27568	down	0.000160733	0.0089265	-	-	-	-	-	-	-	-	1493	ko01100//Metabolic pathways;ko01110//Biosynthesis of secondary metabolites;ko00360//Phenylalanine metabolism;ko00940//Phenylpropanoid biosynthesis	GO:0044444	GO:0046906//tetrapyrrole binding;GO:0016209//antioxidant activity;GO:0043169//cation binding;GO:0003824//catalytic activity	GO:0006950//response to stress;GO:0044710;GO:0009620//response to fungus	gi|356537521|ref|XP_003537275.1|/0/PREDICTED: peroxidase 21 [Glycine max]
Glyma.10G058500	-	-	-	-	-	-	-	-	-	-	-	-	-	-	-	-	-1.10056	down	0.00132615	0.0115702	1495	ko03015//mRNA surveillance pathway;ko03040//Spliceosome	GO:0009526//plastid envelope;GO:0009534//chloroplast thylakoid	GO:0003676//nucleic acid binding;GO:0036094//small molecule binding	GO:0006950//response to stress	gi|356533254|ref|XP_003535181.1|/4.03851e-170/PREDICTED: 29 kDa ribonucleoprotein A, chloroplastic [Glycine max]
Glyma.10G127800	-	-	-	-	-	-	-	-	-	-	-	-	-1.13201	down	0.000185355	0.0115479	-	-	-	-	2177	ko03018//RNA degradation	GO:0005840//ribosome;GO:0009532//plastid stroma;GO:0009526//plastid envelope;GO:0044437;GO:0044429;GO:0016020//membrane	GO:0032550;GO:0046914//transition metal ion binding	GO:0010038//response to metal ion;GO:0006457//protein folding;GO:0006950//response to stress	gi|734343222|gb|KHN10297.1|/0/Chaperonin CPN60-2, mitochondrial [Glycine soja]
Glyma.10G139500	-2.36861	down	8.16e-19	2.48e-16	-2.57317	down	1.67e-12	3.64e-10	-2.40536	down	3.41e-08	4.15e-06	-1.86522	down	0.00010033	0.0072191	-	-	-	-	1869	-	GO:0044436;GO:0044434;GO:0009579//thylakoid	GO:0016853//isomerase activity	GO:0044267//cellular protein metabolic process;GO:0009628//response to abiotic stimulus;GO:1901700;GO:0006950//response to stress;GO:0010033//response to organic substance	gi|947084964|gb|KRH33685.1|;gi|947084962|gb|KRH33683.1|;gi|356534945|ref|XP_003536011.1|/1.08891e-130;0;0/hypothetical protein GLYMA_10G139500 [Glycine max];hypothetical protein GLYMA_10G139500 [Glycine max];PREDICTED: peptidyl-prolyl cis-trans isomerase, chloroplastic [Glycine max]
Glyma.10G172600	-	-	-	-	-	-	-	-	-	-	-	-	-	-	-	-	4.92439	up	2.02e-07	1.81e-05	2373	ko00564//Glycerophospholipid metabolism	GO:0031012//extracellular matrix	GO:0003824//catalytic activity	GO:0009059//macromolecule biosynthetic process;GO:0009688//abscisic acid biosynthetic process;GO:0006950//response to stress	gi|947085533|gb|KRH34254.1|;gi|571483425|ref|XP_003535395.2|/0;0/hypothetical protein GLYMA_10G172600 [Glycine max];PREDICTED: uncharacterized protein LOC100811400 [Glycine max]
Glyma.10G193200	-	-	-	-	-	-	-	-	-	-	-	-	-1.10606	down	0.000804788	0.0341667	-	-	-	-	2162	ko03018//RNA degradation	GO:0005840//ribosome;GO:0009532//plastid stroma;GO:0009526//plastid envelope;GO:0044437;GO:0044429;GO:0016020//membrane	GO:0032550;GO:0046914//transition metal ion binding	GO:0010038//response to metal ion;GO:0006457//protein folding;GO:0006950//response to stress	gi|734398893|gb|KHN30688.1|/0/Chaperonin CPN60-2, mitochondrial [Glycine soja]
Glyma.10G222400	-	-	-	-	-	-	-	-	-	-	-	-	-	-	-	-	1.82533	up	0.000977098	0.00936859	1050	ko01100//Metabolic pathways;ko01110//Biosynthesis of secondary metabolites;ko00360//Phenylalanine metabolism;ko00940//Phenylpropanoid biosynthesis	GO:0005911//cell-cell junction;GO:0005618//cell wall	GO:0003824//catalytic activity;GO:0016209//antioxidant activity;GO:0043169//cation binding;GO:0046906//tetrapyrrole binding	GO:0044710;GO:0006950//response to stress	gi|947086384|gb|KRH35105.1|/0/hypothetical protein GLYMA_10G222400, partial [Glycine max]
Glyma.10G222500	-	-	-	-	2.40311	up	7.89e-07	9.8e-05	-	-	-	-	2.37907	up	1.98e-07	3.46e-05	-	-	-	-	1415	ko01100//Metabolic pathways;ko01110//Biosynthesis of secondary metabolites;ko00360//Phenylalanine metabolism;ko00940//Phenylpropanoid biosynthesis	-	GO:0003824//catalytic activity;GO:0016209//antioxidant activity;GO:0043169//cation binding;GO:0046906//tetrapyrrole binding	GO:0044710;GO:0006950//response to stress	gi|356535764|ref|XP_003536413.1|/0/PREDICTED: peroxidase 12 [Glycine max]
Glyma.10G257900	-	-	-	-	-	-	-	-	-	-	-	-	-	-	-	-	1.81463	up	0.00141957	0.012122	1392	-	-	-	GO:0009628//response to abiotic stimulus;GO:0006950//response to stress	gi|356536109|ref|XP_003536582.1|/2.10555e-136/PREDICTED: zinc finger protein ZAT10-like [Glycine max]
Glyma.10G268500	-	-	-	-	-	-	-	-	-	-	-	-	-	-	-	-	1.4185	up	0.000119953	0.00213424	1884	ko00051//Fructose and mannose metabolism;ko00030//Pentose phosphate pathway;ko00010//Glycolysis / Gluconeogenesis;ko01100//Metabolic pathways;ko01110//Biosynthesis of secondary metabolites;ko00710//Carbon fixation in photosynthetic organisms	GO:0031976;GO:0009532//plastid stroma	GO:0016832//aldehyde-lyase activity	GO:0006950//response to stress;GO:0010038//response to metal ion;GO:0006091//generation of precursor metabolites and energy	gi|947087127|gb|KRH35848.1|;gi|571484814|ref|XP_006589659.1|/0;0/hypothetical protein GLYMA_10G268500 [Glycine max];PREDICTED: probable fructose-bisphosphate aldolase 3, chloroplastic [Glycine max]
Glyma.11G024100	-1.56355	down	2.21e-06	8.14e-05	-	-	-	-	-	-	-	-	-	-	-	-	-1.06825	down	0.00485643	0.0289528	924	ko00480//Glutathione metabolism;ko00590//Arachidonic acid metabolism	-	GO:0004601//peroxidase activity	GO:0006950//response to stress;GO:0044710	gi|947079142|gb|KRH27931.1|/8.36502e-121/hypothetical protein GLYMA_11G024100 [Glycine max]
Glyma.11G027700	-1.70553	down	8.96e-12	1.04e-09	-	-	-	-	-	-	-	-	-	-	-	-	4.20015	up	4.44e-17	5.06e-14	1311	ko00941//Flavonoid biosynthesis;ko01100//Metabolic pathways;ko01110//Biosynthesis of secondary metabolites	-	GO:0016705//oxidoreductase activity, acting on paired donors, with incorporation or reduction of molecular oxygen	GO:0009699//phenylpropanoid biosynthetic process;GO:0006950//response to stress;GO:0001101//response to acid chemical;GO:0006996//organelle organization	gi|359807474|ref|NP_001240884.1|/0/leucoanthocyanidin dioxygenase-like [Glycine max]
Glyma.11G035200	-1.0134	down	5.17e-06	0.000170945	-	-	-	-	-	-	-	-	-	-	-	-	1.68646	up	0.000649341	0.00704177	2408	ko00071//Fatty acid metabolism;ko01040//Biosynthesis of unsaturated fatty acids;ko01100//Metabolic pathways;ko04146//Peroxisome;ko00592//alpha-Linolenic acid metabolism	GO:0042579//microbody;GO:0005911//cell-cell junction	GO:0016634//oxidoreductase activity, acting on the CH-CH group of donors, oxygen as acceptor;GO:0000166//nucleotide binding	GO:0009625//response to insect;GO:0010038//response to metal ion;GO:0009694//jasmonic acid metabolic process;GO:0048229//gametophyte development;GO:0009062//fatty acid catabolic process;GO:0006950//response to stress	gi|947079359|gb|KRH28148.1|;gi|734408808|gb|KHN34915.1|/0;0/hypothetical protein GLYMA_11G035200 [Glycine max];Peroxisomal acyl-coenzyme A oxidase 1 [Glycine soja]
Glyma.11G039400	-	-	-	-	-	-	-	-	-2.84337	down	2.02e-05	0.00145724	-	-	-	-	-	-	-	-	2028	ko00500//Starch and sucrose metabolism;ko01100//Metabolic pathways	GO:0009532//plastid stroma	GO:0016160//amylase activity	GO:0006950//response to stress;GO:0005976//polysaccharide metabolic process;GO:0000023//maltose metabolic process	gi|734408776|gb|KHN34883.1|/0/Beta-amylase 3, chloroplastic [Glycine soja]
Glyma.11G078300	-	-	-	-	-	-	-	-	-	-	-	-	-	-	-	-	3.1502	up	0.000350181	0.00456885	4585	ko04075//Plant hormone signal transduction	-	GO:0004673//protein histidine kinase activity;GO:0032550;GO:0004888//transmembrane signaling receptor activity	GO:0003002//regionalization;GO:0006796//phosphate-containing compound metabolic process;GO:0007165//signal transduction;GO:0044702//single organism reproductive process;GO:0006950//response to stress	gi|571487712|ref|XP_006590729.1|;gi|947080024|gb|KRH28813.1|/0;0/PREDICTED: histidine kinase 1-like isoform X2 [Glycine max];hypothetical protein GLYMA_11G078300 [Glycine max]
Glyma.11G080300	-	-	-	-	-	-	-	-	-	-	-	-	-	-	-	-	2.73761	up	0.000207913	0.00316261	1522	ko01100//Metabolic pathways;ko01110//Biosynthesis of secondary metabolites;ko00360//Phenylalanine metabolism;ko00940//Phenylpropanoid biosynthesis	-	GO:0003824//catalytic activity;GO:0016209//antioxidant activity;GO:0043169//cation binding;GO:0046906//tetrapyrrole binding	GO:0044710;GO:0006950//response to stress	gi|947080055|gb|KRH28844.1|/0/hypothetical protein GLYMA_11G080300 [Glycine max]
Glyma.11G107200	-	-	-	-	-	-	-	-	-	-	-	-	-	-	-	-	1.80125	up	0.000389323	0.00488297	1304	ko00053//Ascorbate and aldarate metabolism;ko00480//Glutathione metabolism	GO:0005911//cell-cell junction;GO:0009526//plastid envelope;GO:0044437	GO:0046906//tetrapyrrole binding;GO:0016209//antioxidant activity	GO:0006950//response to stress;GO:0044710	gi|356538634|ref|XP_003537806.1|/0/PREDICTED: L-ascorbate peroxidase 3, peroxisomal [Glycine max]
Glyma.11G111100	-	-	-	-	-	-	-	-	-	-	-	-	-	-	-	-	-1.17879	down	0.0035816	0.0233676	1962	ko00051//Fructose and mannose metabolism;ko00030//Pentose phosphate pathway;ko00010//Glycolysis / Gluconeogenesis;ko01100//Metabolic pathways;ko01110//Biosynthesis of secondary metabolites;ko00710//Carbon fixation in photosynthetic organisms	GO:0005840//ribosome;GO:0009532//plastid stroma;GO:0009526//plastid envelope;GO:0031976;GO:0005576//extracellular region;GO:0044436	GO:0016832//aldehyde-lyase activity	GO:0010038//response to metal ion;GO:0001101//response to acid chemical;GO:0006091//generation of precursor metabolites and energy;GO:0006950//response to stress	gi|356538694|ref|XP_003537836.1|/0/PREDICTED: fructose-bisphosphate aldolase 1, chloroplastic [Glycine max]
Glyma.11G153800	-	-	-	-	-	-	-	-	-	-	-	-	-	-	-	-	-1.21543	down	0.000990521	0.0094437	1575	-	-	GO:0046872//metal ion binding;GO:0005543//phospholipid binding;GO:0043167//ion binding	GO:0006970//response to osmotic stress;GO:0006950//response to stress;GO:0009628//response to abiotic stimulus	gi|571486420|ref|XP_006590331.1|;gi|947081231|gb|KRH30020.1|;gi|947081232|gb|KRH30021.1|/0;3.81041e-174;0/PREDICTED: uncharacterized protein LOC100806472 isoform X1 [Glycine max];hypothetical protein GLYMA_11G153800 [Glycine max];hypothetical protein GLYMA_11G153800 [Glycine max]
Glyma.11G178100	-	-	-	-	-	-	-	-	-	-	-	-	-1.37725	down	0.00135308	0.049542	-	-	-	-	868	-	GO:0031981//nuclear lumen;GO:0009536//plastid;GO:0044437;GO:0000785//chromatin;GO:0005911//cell-cell junction;GO:0016020//membrane	GO:0003676//nucleic acid binding;GO:0046983//protein dimerization activity	GO:0034728//nucleosome organization;GO:0006950//response to stress	gi|475622287|gb|EMT31824.1|/1.35134e-52/Histone H4 [Aegilops tauschii]
Glyma.11G212900	-	-	-	-	-	-	-	-	-	-	-	-	-	-	-	-	8.84592	up	1.57e-38	8.93e-35	1005	ko00480//Glutathione metabolism	GO:0000325//plant-type vacuole	GO:0043167//ion binding;GO:0016765//transferase activity, transferring alkyl or aryl (other than methyl) groups	GO:0006950//response to stress;GO:0009962//regulation of flavonoid biosynthetic process	gi|959092507|ref|NP_001304475.1|/1.32038e-156/glutathione S-transferase F11-like [Glycine max]
Glyma.11G247600	1.56653	up	1.4e-10	1.35e-08	-	-	-	-	-	-	-	-	-	-	-	-	1.77344	up	1.23e-05	0.000406735	1578	ko00010//Glycolysis / Gluconeogenesis;ko01100//Metabolic pathways;ko01110//Biosynthesis of secondary metabolites	GO:0030312//external encapsulating structure;GO:0031981//nuclear lumen;GO:0009536//plastid;GO:0005911//cell-cell junction;GO:0016020//membrane	GO:0046914//transition metal ion binding;GO:0016903//oxidoreductase activity, acting on the aldehyde or oxo group of donors;GO:0000166//nucleotide binding	GO:0010038//response to metal ion;GO:0019318//hexose metabolic process;GO:0009617//response to bacterium;GO:0006950//response to stress	gi|359806082|ref|NP_001241184.1|/0/uncharacterized protein LOC100807342 [Glycine max]
Glyma.11G252900	-	-	-	-	-	-	-	-	-	-	-	-	-	-	-	-	-2.37097	down	0.000253894	0.00364067	1685	ko03010//Ribosome	GO:0009532//plastid stroma	GO:0003676//nucleic acid binding;GO:0003824//catalytic activity	GO:0006950//response to stress	gi|947082755|gb|KRH31544.1|;gi|356538073|ref|XP_003537529.1|/0;0/hypothetical protein GLYMA_11G252900 [Glycine max];PREDICTED: 30S ribosomal protein S1 homolog isoform X1 [Glycine max]
Glyma.12G037400	-	-	-	-	-	-	-	-	-	-	-	-	-	-	-	-	-1.06251	down	0.00432851	0.0267853	1707	ko00051//Fructose and mannose metabolism;ko00030//Pentose phosphate pathway;ko00010//Glycolysis / Gluconeogenesis;ko01100//Metabolic pathways;ko01110//Biosynthesis of secondary metabolites;ko00710//Carbon fixation in photosynthetic organisms	GO:0005840//ribosome;GO:0009532//plastid stroma;GO:0009526//plastid envelope;GO:0031976;GO:0005576//extracellular region;GO:0044436	GO:0016832//aldehyde-lyase activity	GO:0010038//response to metal ion;GO:0001101//response to acid chemical;GO:0006091//generation of precursor metabolites and energy;GO:0006950//response to stress	gi|734387664|gb|KHN25427.1|/0/Fructose-bisphosphate aldolase 1, chloroplastic [Glycine soja]
Glyma.12G064000	-	-	-	-	-	-	-	-	-	-	-	-	-	-	-	-	1.3953	up	0.00865615	0.0433887	2285	ko04144//Endocytosis;ko04141//Protein processing in endoplasmic reticulum;ko03040//Spliceosome	GO:0005840//ribosome;GO:0030312//external encapsulating structure;GO:0009526//plastid envelope;GO:0044437;GO:0005911//cell-cell junction;GO:0005576//extracellular region;GO:0016020//membrane	GO:0032550;GO:0019899//enzyme binding	GO:0051707//response to other organism;GO:0010038//response to metal ion;GO:0009628//response to abiotic stimulus;GO:0006950//response to stress	gi|734402634|gb|KHN32117.1|/0/Heat shock cognate 70 kDa protein [Glycine soja]
Glyma.13G028200	-	-	-	-	3.83427	up	1.88e-21	8.57e-19	2.99907	up	6.7e-06	0.000546876	1.79323	up	0.000163629	0.0104575	-	-	-	-	816	ko00195//Photosynthesis;ko01100//Metabolic pathways	GO:0009521;GO:0031224//intrinsic component of membrane;GO:0009534//chloroplast thylakoid	GO:0046914//transition metal ion binding;GO:0009055//electron carrier activity;GO:0003824//catalytic activity	GO:0006950//response to stress;GO:0009767//photosynthetic electron transport chain	gi|947069046|gb|KRH17937.1|/0/hypothetical protein GLYMA_13G028200, partial [Glycine max]
Glyma.13G058600	-	-	-	-	-	-	-	-	-	-	-	-	-	-	-	-	1.47973	up	4.86e-05	0.00110784	3288	-	GO:0009532//plastid stroma	GO:0016462//pyrophosphatase activity;GO:0032550	GO:0006950//response to stress;GO:0009657//plastid organization;GO:0051604//protein maturation	gi|734331638|gb|KHN07152.1|/0/Chaperone protein ClpB3, chloroplastic [Glycine soja]
Glyma.13G067900	-	-	-	-	-	-	-	-	-3.59062	down	2.72e-05	0.00191048	-	-	-	-	3.05666	up	0.000280872	0.00392202	1651	ko00500//Starch and sucrose metabolism;ko01110//Biosynthesis of secondary metabolites;ko00520//Amino sugar and nucleotide sugar metabolism	-	GO:0016740//transferase activity	GO:0006950//response to stress	gi|356550372|ref|XP_003543561.1|/0/PREDICTED: probable galacturonosyltransferase-like 10 [Glycine max]
Glyma.13G088100	-	-	-	-	-	-	-	-	-	-	-	-	-	-	-	-	2.25151	up	0.000699817	0.00740611	1919	-	-	-	GO:0009987//cellular process;GO:0009628//response to abiotic stimulus;GO:0006950//response to stress	gi|356548125|ref|XP_003542454.1|/2.69255e-175/PREDICTED: ethylene-responsive transcription factor RAP2-4 [Glycine max]
Glyma.13G112500	-	-	-	-	-	-	-	-	-	-	-	-	-	-	-	-	-1.57241	down	0.000398346	0.00496699	1219	-	GO:0009532//plastid stroma;GO:0009526//plastid envelope;GO:0009534//chloroplast thylakoid;GO:0005576//extracellular region	GO:0032550;GO:0046914//transition metal ion binding	GO:0010038//response to metal ion;GO:0044267//cellular protein metabolic process;GO:0051353//positive regulation of oxidoreductase activity;GO:0006950//response to stress	gi|571497607|ref|XP_006593958.1|/1.45306e-162/PREDICTED: 20 kDa chaperonin, chloroplastic [Glycine max]
Glyma.13G147000	-	-	-	-	-	-	-	-	-	-	-	-	-	-	-	-	-1.77395	down	8.3e-06	0.000301323	687	-	GO:0031981//nuclear lumen;GO:0009536//plastid;GO:0044437;GO:0000785//chromatin;GO:0005911//cell-cell junction;GO:0016020//membrane	GO:0003676//nucleic acid binding;GO:0046983//protein dimerization activity	GO:0034728//nucleosome organization;GO:0006950//response to stress	gi|475622287|gb|EMT31824.1|/1.35134e-52/Histone H4 [Aegilops tauschii]
Glyma.13G195200	-	-	-	-	-	-	-	-	-	-	-	-	-	-	-	-	1.70917	up	5.94e-05	0.00128098	5403	-	GO:0043231//intracellular membrane-bounded organelle	GO:0046914//transition metal ion binding;GO:0016301//kinase activity;GO:0032550;GO:0005515//protein binding;GO:0019787//ubiquitin-like protein transferase activity;GO:0050136//NADH dehydrogenase (quinone) activity	GO:0040007//growth;GO:1902582;GO:0032446//protein modification by small protein conjugation;GO:0006950//response to stress;GO:0009738//abscisic acid-activated signaling pathway;GO:0046903//secretion;GO:0022904//respiratory electron transport chain	gi|947071810|gb|KRH20701.1|/0/hypothetical protein GLYMA_13G195200 [Glycine max]
Glyma.13G196600	-	-	-	-	-	-	-	-	-	-	-	-	-2.23781	down	8.3e-06	0.000913442	-2.22294	down	0.00080266	0.00813239	1567	-	GO:0009532//plastid stroma;GO:0016020//membrane;GO:0009536//plastid	GO:0003824//catalytic activity	GO:0009617//response to bacterium;GO:0006970//response to osmotic stress;GO:0044710;GO:0006950//response to stress	gi|571495833|ref|XP_006593398.1|;gi|351722504|ref|NP_001237502.1|/4.24891e-129;1.45189e-127/PREDICTED: uncharacterized protein LOC100527538 isoform X1 [Glycine max];uncharacterized protein LOC100527538 [Glycine max]
Glyma.13G243100	-	-	-	-	-	-	-	-	-	-	-	-	-	-	-	-	-1.34424	down	0.000264876	0.00374542	1716	ko03010//Ribosome	GO:0015934//large ribosomal subunit;GO:0016020//membrane;GO:0044437;GO:0009536//plastid;GO:0031981//nuclear lumen	GO:0005198//structural molecule activity	GO:0006950//response to stress;GO:0010467//gene expression	gi|734337622|gb|KHN08559.1|/1.12516e-80/60S ribosomal protein L26-1 [Glycine soja]
Glyma.13G301600	2.80312	up	2.63e-10	2.4e-08	-	-	-	-	-	-	-	-	-	-	-	-	-	-	-	-	720	-	GO:0043231//intracellular membrane-bounded organelle	-	GO:0006950//response to stress	gi|351727659|ref|NP_001238192.1|/1.19665e-49/uncharacterized protein LOC100305628 [Glycine max]
Glyma.13G325900	-	-	-	-	-	-	-	-	-	-	-	-	-	-	-	-	-1.12475	down	0.00164834	0.0134471	1652	-	GO:0031224//intrinsic component of membrane;GO:0005911//cell-cell junction	GO:0005372//water transmembrane transporter activity	GO:0055085//transmembrane transport;GO:0001101//response to acid chemical;GO:0048588//developmental cell growth;GO:0042044//fluid transport;GO:0006950//response to stress;GO:0051234//establishment of localization	gi|162457846|ref|NP_001105639.1|;gi|947073999|gb|KRH22890.1|/0;3.82382e-137/aquaporin PIP2-7 [Zea mays];hypothetical protein GLYMA_13G325900 [Glycine max]
Glyma.13G367000	-	-	-	-	-	-	-	-	-	-	-	-	-	-	-	-	-1.15636	down	0.00288209	0.0202214	1219	ko00190//Oxidative phosphorylation;ko01100//Metabolic pathways	GO:0005746//mitochondrial respiratory chain	GO:0046914//transition metal ion binding;GO:0051536//iron-sulfur cluster binding;GO:0003824//catalytic activity	GO:0006950//response to stress;GO:0044710	gi|947074709|gb|KRH23600.1|;gi|947074707|gb|KRH23598.1|;gi|947074708|gb|KRH23599.1|/1.886e-169;0;0/hypothetical protein GLYMA_13G367000 [Glycine max];hypothetical protein GLYMA_13G367000 [Glycine max];hypothetical protein GLYMA_13G367000 [Glycine max]
Glyma.14G061200	-	-	-	-	-	-	-	-	-3.40964	down	0.000871461	0.03521	-	-	-	-	3.54047	up	1.14e-05	0.000383288	1734	-	-	-	GO:0006950//response to stress	gi|571507539|ref|XP_003545237.2|/0/PREDICTED: nematode resistance protein-like HSPRO2 [Glycine max]
Glyma.14G078600	-	-	-	-	-	-	-	-	-	-	-	-	1.27601	up	0.000593347	0.0273279	2.69163	up	2.01e-07	1.81e-05	1720	ko01100//Metabolic pathways;ko00592//alpha-Linolenic acid metabolism	GO:0009526//plastid envelope;GO:0009534//chloroplast thylakoid	GO:0046906//tetrapyrrole binding;GO:0046914//transition metal ion binding;GO:0016491//oxidoreductase activity;GO:0016836//hydro-lyase activity	GO:0051707//response to other organism;GO:0006631//fatty acid metabolic process;GO:0001101//response to acid chemical;GO:0006950//response to stress	gi|947066131|gb|KRH15274.1|/0/hypothetical protein GLYMA_14G078600 [Glycine max]
Glyma.14G084700	-1.63605	down	8.73e-10	7.09e-08	-	-	-	-	-	-	-	-	-	-	-	-	-	-	-	-	1592	-	GO:0043231//intracellular membrane-bounded organelle	GO:0003676//nucleic acid binding;GO:0001071//nucleic acid binding transcription factor activity	GO:0006950//response to stress;GO:0006351//transcription, DNA-templated	gi|351724471|ref|NP_001235779.1|/2.00806e-130/dehydration responsive element binding protein [Glycine max]
Glyma.14G088300	-	-	-	-	-1.64059	down	0.00031123	0.0224516	-3.5117	down	1.76e-05	0.00128251	-	-	-	-	2.38448	up	4.3e-05	0.00101352	1097	-	-	GO:0043169//cation binding	GO:0050789//regulation of biological process;GO:0001101//response to acid chemical;GO:0009719;GO:0009628//response to abiotic stimulus;GO:0007275//multicellular organismal development;GO:0006950//response to stress;GO:0010033//response to organic substance	gi|390517035|ref|NP_001254622.1|/2.3512e-131/zinc finger protein ZAT10-like [Glycine max]
Glyma.14G111800	-	-	-	-	-	-	-	-	-	-	-	-	-1.41012	down	9.21e-05	0.00677625	-	-	-	-	2504	ko00270//Cysteine and methionine metabolism;ko00330//Arginine and proline metabolism;ko00960//Tropane, piperidine and pyridine alkaloid biosynthesis;ko01100//Metabolic pathways;ko01110//Biosynthesis of secondary metabolites;ko00360//Phenylalanine metabolism;ko00250//Alanine, aspartate and glutamate metabolism;ko00400//Phenylalanine, tyrosine and tryptophan biosynthesis;ko00950//Isoquinoline alkal…	GO:0009532//plastid stroma;GO:0009526//plastid envelope;GO:0044429;GO:0005576//extracellular region	GO:0043168//anion binding;GO:0070546	GO:0010038//response to metal ion;GO:0043648//dicarboxylic acid metabolic process;GO:0009064//glutamine family amino acid metabolic process;GO:0009066;GO:0006950//response to stress	gi|734321388|gb|KHN04158.1|;gi|947066652|gb|KRH15795.1|/0;0/Aspartate aminotransferase P2, mitochondrial [Glycine soja] ;hypothetical protein GLYMA_14G111800 [Glycine max]
Glyma.14G171500	-	-	-	-	-	-	-	-	-1.8387	down	5.17e-05	0.00336292	-	-	-	-	-	-	-	-	1795	-	-	-	GO:0009987//cellular process;GO:0009628//response to abiotic stimulus;GO:0006950//response to stress	gi|571510835|ref|XP_006596336.1|/6.02977e-159/PREDICTED: ethylene-responsive transcription factor RAP2-4-like [Glycine max]
Glyma.14G176700	-	-	-	-	-	-	-	-	-	-	-	-	-	-	-	-	2.10905	up	0.00499096	0.0295694	1728	ko04075//Plant hormone signal transduction	GO:0043231//intracellular membrane-bounded organelle	GO:0004672//protein kinase activity;GO:0032550	GO:0006796//phosphate-containing compound metabolic process;GO:0009628//response to abiotic stimulus;GO:0006950//response to stress;GO:0006464//cellular protein modification process	gi|734344379|gb|KHN10464.1|/0/Serine/threonine-protein kinase SAPK2 [Glycine soja]
Glyma.14G190800	-	-	-	-	-	-	-	-	-	-	-	-	-	-	-	-	-1.21471	down	0.00601666	0.0336275	1491	-	GO:0031981//nuclear lumen;GO:0009536//plastid;GO:0044437;GO:0000785//chromatin;GO:0005911//cell-cell junction;GO:0016020//membrane	GO:0003676//nucleic acid binding;GO:0046983//protein dimerization activity	GO:0034728//nucleosome organization;GO:0006950//response to stress	gi|475622287|gb|EMT31824.1|/1.35134e-52/Histone H4 [Aegilops tauschii]
Glyma.14G195200	-	-	-	-	-	-	-	-	-3.78084	down	3.31e-05	0.00226214	-	-	-	-	3.02087	up	0.000168242	0.00272903	1825	ko04075//Plant hormone signal transduction	GO:0043231//intracellular membrane-bounded organelle	GO:0043169//cation binding;GO:0004721//phosphoprotein phosphatase activity	GO:0009620//response to fungus;GO:0006464//cellular protein modification process;GO:0009755//hormone-mediated signaling pathway;GO:0006950//response to stress	gi|356553088|ref|XP_003544890.1|;gi|947067914|gb|KRH17057.1|/0;5.22623e-137/PREDICTED: probable protein phosphatase 2C 25 [Glycine max];hypothetical protein GLYMA_14G195200 [Glycine max]
Glyma.14G201700	1.10966	up	0.00466477	0.0391339	-	-	-	-	-	-	-	-	-	-	-	-	-	-	-	-	1549	ko01100//Metabolic pathways;ko01110//Biosynthesis of secondary metabolites;ko00360//Phenylalanine metabolism;ko00940//Phenylpropanoid biosynthesis	-	GO:0003824//catalytic activity;GO:0016209//antioxidant activity;GO:0043169//cation binding;GO:0046906//tetrapyrrole binding	GO:0044710;GO:0006950//response to stress	gi|947068000|gb|KRH17143.1|/0/hypothetical protein GLYMA_14G201700 [Glycine max]
Glyma.15G006400	-	-	-	-	-	-	-	-	-	-	-	-	-	-	-	-	-1.1887	down	0.00164483	0.0134226	1964	ko00190//Oxidative phosphorylation;ko01100//Metabolic pathways	GO:0005746//mitochondrial respiratory chain	GO:0046914//transition metal ion binding;GO:0051536//iron-sulfur cluster binding;GO:0003824//catalytic activity	GO:0006950//response to stress;GO:0044710	gi|947074707|gb|KRH23598.1|/0/hypothetical protein GLYMA_13G367000 [Glycine max]
Glyma.15G034000	-	-	-	-	-	-	-	-	-	-	-	-	-	-	-	-	1.3977	up	0.00982217	0.0473046	3882	ko00230//Purine metabolism;ko00232//Caffeine metabolism;ko01100//Metabolic pathways;ko01110//Biosynthesis of secondary metabolites;ko04146//Peroxisome	GO:0044444	GO:0046914//transition metal ion binding;GO:0051536//iron-sulfur cluster binding;GO:0016616//oxidoreductase activity, acting on the CH-OH group of donors, NAD or NADP as acceptor;GO:0000166//nucleotide binding	GO:0006144//purine nucleobase metabolic process;GO:0006950//response to stress;GO:0006801//superoxide metabolic process	gi|947060936|gb|KRH10197.1|/0/hypothetical protein GLYMA_15G034000 [Glycine max]
Glyma.15G052700	-	-	-	-	-	-	-	-	-	-	-	-	-	-	-	-	4.56792	up	0.00382858	0.0245437	1267	ko01100//Metabolic pathways;ko01110//Biosynthesis of secondary metabolites;ko00360//Phenylalanine metabolism;ko00940//Phenylpropanoid biosynthesis	GO:0043231//intracellular membrane-bounded organelle;GO:0030312//external encapsulating structure;GO:0005911//cell-cell junction;GO:0005576//extracellular region;GO:0016020//membrane	GO:0043169//cation binding;GO:0046906//tetrapyrrole binding;GO:0016209//antioxidant activity;GO:0003824//catalytic activity	GO:0009620//response to fungus;GO:0009698//phenylpropanoid metabolic process;GO:0042743//hydrogen peroxide metabolic process;GO:0006950//response to stress	gi|955366031|ref|XP_014622898.1|/0/PREDICTED: cationic peroxidase 2 [Glycine max]
Glyma.15G088000	-	-	-	-	-	-	-	-	-	-	-	-	1.6912	up	0.000117653	0.00816513	2.7109	up	1.87e-06	9.72e-05	2418	ko04144//Endocytosis;ko04141//Protein processing in endoplasmic reticulum;ko03040//Spliceosome	GO:0030312//external encapsulating structure;GO:0009536//plastid;GO:0016020//membrane	GO:0032550;GO:0016891//endoribonuclease activity, producing 5'-phosphomonoesters	GO:0051707//response to other organism;GO:0090501//RNA phosphodiester bond hydrolysis;GO:0006950//response to stress	gi|947061823|gb|KRH11084.1|/0/hypothetical protein GLYMA_15G088000 [Glycine max]
Glyma.15G100700	-	-	-	-	-	-	-	-	-	-	-	-	-	-	-	-	-1.51604	down	8.64e-05	0.00168484	833	-	-	GO:0016671//oxidoreductase activity, acting on a sulfur group of donors, disulfide as acceptor	GO:0044710;GO:0044267//cellular protein metabolic process;GO:0006950//response to stress	gi|351724743|ref|NP_001237068.1|/4.00215e-99/uncharacterized protein LOC100305558 [Glycine max]
Glyma.15G124500	-	-	-	-	-	-	-	-	-	-	-	-	-	-	-	-	-2.36217	down	0.00759624	0.0395568	1927	-	GO:0016020//membrane;GO:0031224//intrinsic component of membrane	GO:0005515//protein binding	GO:0050896//response to stimulus;GO:0006950//response to stress	gi|947062437|gb|KRH11698.1|;gi|571518103|ref|XP_006597646.1|/0;0/hypothetical protein GLYMA_15G124500 [Glycine max];PREDICTED: MLO-like protein 13 [Glycine max]
Glyma.15G128700	-	-	-	-	-	-	-	-	-	-	-	-	-	-	-	-	2.99002	up	0.00283819	0.0200148	1464	ko01100//Metabolic pathways;ko01110//Biosynthesis of secondary metabolites;ko00360//Phenylalanine metabolism;ko00940//Phenylpropanoid biosynthesis	-	GO:0003824//catalytic activity;GO:0016209//antioxidant activity;GO:0043169//cation binding;GO:0046906//tetrapyrrole binding	GO:0044710;GO:0006950//response to stress	gi|734356908|gb|KHN14345.1|/0/Peroxidase 22 [Glycine soja]
Glyma.15G132600	-	-	-	-	-	-	-	-	-	-	-	-	-	-	-	-	1.5412	up	0.0100251	0.0480386	2044	ko00908//Zeatin biosynthesis	GO:0030312//external encapsulating structure;GO:0005911//cell-cell junction	GO:0046993;GO:0016616//oxidoreductase activity, acting on the CH-OH group of donors, NAD or NADP as acceptor;GO:0000166//nucleotide binding	GO:0044710;GO:0000741//karyogamy;GO:0003006//developmental process involved in reproduction;GO:0006950//response to stress	gi|356555926|ref|XP_003546280.1|/0/PREDICTED: inactive tetrahydrocannabinolic acid synthase-like [Glycine max]
Glyma.15G132800	-	-	-	-	-	-	-	-	-	-	-	-	-	-	-	-	3.43451	up	8.07e-05	0.00160933	2173	-	GO:0005911//cell-cell junction;GO:0005618//cell wall;GO:0043231//intracellular membrane-bounded organelle;GO:0044444;GO:0005576//extracellular region;GO:0016020//membrane	GO:0016616//oxidoreductase activity, acting on the CH-OH group of donors, NAD or NADP as acceptor;GO:0000166//nucleotide binding	GO:0006950//response to stress;GO:0044710	gi|734356870|gb|KHN14307.1|/0/Reticuline oxidase-like protein [Glycine soja]
Glyma.15G162600	-	-	-	-	-	-	-	-	-	-	-	-	-	-	-	-	1.31971	up	0.00704132	0.0374914	3504	ko00190//Oxidative phosphorylation	GO:0005911//cell-cell junction;GO:0043231//intracellular membrane-bounded organelle;GO:0031224//intrinsic component of membrane	GO:0032550;GO:0017111//nucleoside-triphosphatase activity;GO:0046872//metal ion binding;GO:0008324//cation transmembrane transporter activity	GO:0015988//energy coupled proton transmembrane transport, against electrochemical gradient;GO:0009152//purine ribonucleotide biosynthetic process;GO:0010118//stomatal movement;GO:0001101//response to acid chemical;GO:0009154//purine ribonucleotide catabolic process;GO:0006950//response to stress	gi|356556196|ref|XP_003546412.1|/0/PREDICTED: plasma membrane ATPase 4-like [Glycine max]
Glyma.15G217100	2.88696	up	3.31e-08	1.94e-06	-	-	-	-	-	-	-	-	-	-	-	-	-	-	-	-	823	-	-	-	GO:0006950//response to stress	gi|351726383|ref|NP_001235333.1|/4.13848e-109/uncharacterized protein LOC100306201 [Glycine max]
Glyma.15G218900	-	-	-	-	-	-	-	-	-	-	-	-	-	-	-	-	5.54997	up	0.000357327	0.00461354	848	-	-	-	GO:0006950//response to stress	gi|734420599|gb|KHN40931.1|/6.60831e-110/MLP-like protein 43 [Glycine soja]
Glyma.15G261900	-	-	-	-	-	-	-	-	-	-	-	-	-	-	-	-	-1.03818	down	0.00210714	0.0160432	2027	ko00010//Glycolysis / Gluconeogenesis;ko01100//Metabolic pathways;ko01110//Biosynthesis of secondary metabolites;ko00710//Carbon fixation in photosynthetic organisms	GO:0030312//external encapsulating structure;GO:0009532//plastid stroma;GO:0009526//plastid envelope;GO:0005576//extracellular region	GO:0032550;GO:0016301//kinase activity	GO:0010038//response to metal ion;GO:0006091//generation of precursor metabolites and energy;GO:0006796//phosphate-containing compound metabolic process;GO:0006950//response to stress	gi|947064495|gb|KRH13756.1|;gi|356557028|ref|XP_003546820.1|/0;0/hypothetical protein GLYMA_15G261900 [Glycine max];PREDICTED: phosphoglycerate kinase, cytosolic [Glycine max]
Glyma.15G274300	-	-	-	-	-	-	-	-	-	-	-	-	-	-	-	-	-2.65611	down	0.000723681	0.00758395	720	-	GO:0009536//plastid	-	GO:0006950//response to stress	gi|734419109|gb|KHN39933.1|/1.97483e-113/MLP-like protein 28 [Glycine soja]
Glyma.16G044900	-	-	-	-	-	-	-	-	-	-	-	-	-	-	-	-	-1.24314	down	0.00193643	0.0151603	1619	ko01100//Metabolic pathways;ko00710//Carbon fixation in photosynthetic organisms	GO:0009526//plastid envelope;GO:0009534//chloroplast thylakoid;GO:0005576//extracellular region	GO:0016620//oxidoreductase activity, acting on the aldehyde or oxo group of donors, NAD or NADP as acceptor;GO:0000166//nucleotide binding	GO:0009314//response to radiation;GO:0019318//hexose metabolic process;GO:0034285;GO:0006950//response to stress	gi|356561064|ref|XP_003548805.1|/0/PREDICTED: glyceraldehyde-3-phosphate dehydrogenase A, chloroplastic [Glycine max]
Glyma.16G055900	-	-	-	-	-	-	-	-	-	-	-	-	2.35556	up	0.000155241	0.0101272	-	-	-	-	1382	ko01100//Metabolic pathways;ko01110//Biosynthesis of secondary metabolites;ko00360//Phenylalanine metabolism;ko00940//Phenylpropanoid biosynthesis	-	GO:0003824//catalytic activity;GO:0016209//antioxidant activity;GO:0043169//cation binding;GO:0046906//tetrapyrrole binding	GO:0044710;GO:0006950//response to stress	gi|571525981|ref|XP_003548517.2|/0/PREDICTED: peroxidase 55-like [Glycine max]
Glyma.16G080100	-	-	-	-	-	-	-	-	-	-	-	-	-	-	-	-	2.30011	up	0.000389779	0.00488654	2340	-	GO:0031224//intrinsic component of membrane	GO:0005515//protein binding	GO:0006950//response to stress	gi|947057895|gb|KRH07301.1|;gi|734311089|gb|KHM99994.1|/0;0/hypothetical protein GLYMA_16G080100 [Glycine max];MLO-like protein 1 [Glycine soja]
Glyma.16G098700	-3.90302	down	1.84e-10	1.74e-08	-	-	-	-	-	-	-	-	-	-	-	-	-	-	-	-	1682	ko04141//Protein processing in endoplasmic reticulum	GO:0005911//cell-cell junction;GO:0044432	GO:0003824//catalytic activity	GO:0006950//response to stress;GO:0000904//cell morphogenesis involved in differentiation;GO:0044710	gi|955373994|ref|XP_014623933.1|/0/PREDICTED: dnaJ protein ERDJ3A-like [Glycine max]
Glyma.16G100400	-	-	-	-	-	-	-	-	-	-	-	-	1.29943	up	0.000968032	0.0391401	-	-	-	-	537	-	GO:0005911//cell-cell junction;GO:0016020//membrane;GO:0005618//cell wall	GO:0016787//hydrolase activity	GO:0016485//protein processing;GO:0006950//response to stress	gi|734383103|gb|KHN23780.1|/2.1965e-29/Defensin SD2 [Glycine soja]
Glyma.16G129800	-	-	-	-	-	-	-	-	-	-	-	-	-	-	-	-	-1.16445	down	0.00247622	0.018044	1290	-	-	GO:0016671//oxidoreductase activity, acting on a sulfur group of donors, disulfide as acceptor	GO:0044710;GO:0044267//cellular protein metabolic process;GO:0006950//response to stress	gi|356559314|ref|XP_003547945.1|/8.30954e-177/PREDICTED: peptide methionine sulfoxide reductase A5-like [Glycine max]
Glyma.16G159700	2.02261	up	8.96e-05	0.00182917	-	-	-	-	-	-	-	-	-	-	-	-	4.85712	up	3.48e-05	0.000885028	3395	ko00230//Purine metabolism;ko00240//Pyrimidine metabolism;ko01100//Metabolic pathways;ko03020//RNA polymerase	-	GO:0016462//pyrophosphatase activity;GO:0032550	GO:0006950//response to stress;GO:0007154//cell communication	gi|571528807|ref|XP_006599456.1|/0/PREDICTED: TMV resistance protein N-like [Glycine max]
Glyma.16G164400	-	-	-	-	-	-	-	-	-	-	-	-	-	-	-	-	10.1391	up	2.44e-08	3.34e-06	1424	ko01100//Metabolic pathways;ko01110//Biosynthesis of secondary metabolites;ko00360//Phenylalanine metabolism;ko00940//Phenylpropanoid biosynthesis	-	GO:0003824//catalytic activity;GO:0016209//antioxidant activity;GO:0043169//cation binding;GO:0046906//tetrapyrrole binding	GO:0044710;GO:0006950//response to stress	gi|947059246|gb|KRH08652.1|;gi|358249064|ref|NP_001239731.1|/0;0/hypothetical protein GLYMA_16G164400 [Glycine max];uncharacterized protein LOC100795412 precursor [Glycine max]
Glyma.16G211400	-	-	-	-	-	-	-	-	-	-	-	-	-	-	-	-	3.37201	up	0.000750219	0.00777225	5242	-	-	GO:0016462//pyrophosphatase activity;GO:0032550	GO:0006950//response to stress;GO:0007154//cell communication	gi|947059957|gb|KRH09363.1|;gi|947059961|gb|KRH09367.1|;gi|947059960|gb|KRH09366.1|/0;0;0/hypothetical protein GLYMA_16G211400 [Glycine max];hypothetical protein GLYMA_16G211400 [Glycine max];hypothetical protein GLYMA_16G211400 [Glycine max]
Glyma.16G212300	-1.85578	down	0.000242423	0.00408738	-	-	-	-	-	-	-	-	-	-	-	-	-	-	-	-	3786	ko00230//Purine metabolism;ko00240//Pyrimidine metabolism;ko01100//Metabolic pathways;ko03020//RNA polymerase	-	GO:0016462//pyrophosphatase activity;GO:0032550	GO:0006950//response to stress;GO:0007154//cell communication	gi|358248732|ref|NP_001239675.1|/0/TMV resistance protein N-like [Glycine max]
Glyma.17G030000	-	-	-	-	-	-	-	-	-2.71439	down	0.0010511	0.0402101	-	-	-	-	2.67176	up	0.00630788	0.0347982	1005	-	-	-	GO:0006950//response to stress	gi|734319289|gb|KHN03329.1|/1.47272e-115/Pathogenesis-related protein STH-2 [Glycine soja]
Glyma.17G030100	-	-	-	-	-	-	-	-	-	-	-	-	-	-	-	-	8.97181	up	8.6e-06	0.000311063	867	-	-	-	GO:0006950//response to stress	gi|734319288|gb|KHN03328.1|/4.37402e-111/Major allergen Pru av 1 [Glycine soja]
Glyma.17G030200	-3.51988	down	3.28e-08	1.93e-06	-	-	-	-	-	-	-	-	1.77618	up	0.000594965	0.0273279	5.06797	up	8.56e-10	2.06e-07	947	-	-	-	GO:0006950//response to stress	gi|351725047|ref|NP_001236055.1|/4.96124e-92/uncharacterized protein LOC547916 [Glycine max]
Glyma.17G030300	-	-	-	-	-	-	-	-	-	-	-	-	-	-	-	-	9.30716	up	5.3e-06	0.000217644	896	-	-	-	GO:0006950//response to stress	gi|359807211|ref|NP_001241617.1|/4.85297e-92/uncharacterized protein LOC100791036 [Glycine max]
Glyma.17G047200	-	-	-	-	-	-	-	-	-	-	-	-	-	-	-	-	-1.39217	down	0.00167378	0.0135928	908	-	GO:0009532//plastid stroma;GO:0009526//plastid envelope;GO:0009534//chloroplast thylakoid;GO:0005576//extracellular region	GO:0032550;GO:0046914//transition metal ion binding	GO:0010038//response to metal ion;GO:0044267//cellular protein metabolic process;GO:0051353//positive regulation of oxidoreductase activity;GO:0006950//response to stress	gi|947053124|gb|KRH02577.1|;gi|947053123|gb|KRH02576.1|/2.70356e-142;7.30452e-139/hypothetical protein GLYMA_17G047200 [Glycine max];hypothetical protein GLYMA_17G047200 [Glycine max]
Glyma.17G063200	-	-	-	-	-	-	-	-	-	-	-	-	-	-	-	-	-1.46477	down	0.000117635	0.00210745	815	-	GO:0031981//nuclear lumen;GO:0009536//plastid;GO:0044437;GO:0000785//chromatin;GO:0005911//cell-cell junction;GO:0016020//membrane	GO:0003676//nucleic acid binding;GO:0046983//protein dimerization activity	GO:0034728//nucleosome organization;GO:0006950//response to stress	gi|475622287|gb|EMT31824.1|/1.35134e-52/Histone H4 [Aegilops tauschii]
Glyma.17G072400	-1.08777	down	2.04e-05	0.00054269	-	-	-	-	-	-	-	-	-	-	-	-	-	-	-	-	2310	ko04144//Endocytosis;ko04141//Protein processing in endoplasmic reticulum;ko03040//Spliceosome	GO:0016020//membrane;GO:0030312//external encapsulating structure;GO:0009536//plastid	GO:0032550	GO:0006950//response to stress;GO:0051707//response to other organism	gi|356562559|ref|XP_003549537.1|/0/PREDICTED: heat shock 70 kDa protein [Glycine max]
Glyma.17G145100	-	-	-	-	-	-	-	-	-	-	-	-	-	-	-	-	3.21091	up	0.00114478	0.0104214	2868	-	-	GO:0004551//nucleotide diphosphatase activity;GO:0016787//hydrolase activity;GO:0003824//catalytic activity	GO:0006950//response to stress	gi|571532280|ref|XP_006600227.1|;gi|947054735|gb|KRH04188.1|;gi|947054734|gb|KRH04187.1|;gi|359806679|ref|NP_001241031.1|/0;0;0;0/PREDICTED: uncharacterized protein LOC100815507 isoform X1 [Glycine max];hypothetical protein GLYMA_17G145100 [Glycine max];hypothetical protein GLYMA_17G145100 [Glycine max];uncharacterized protein LOC100815507 [Glycine max]
Glyma.17G218700	-	-	-	-	-	-	-	-	-	-	-	-	-	-	-	-	1.35911	up	0.00956145	0.0464016	3043	ko04075//Plant hormone signal transduction	-	GO:0043169//cation binding;GO:0004721//phosphoprotein phosphatase activity	GO:0009767//photosynthetic electron transport chain;GO:0001933//negative regulation of protein phosphorylation;GO:0009738//abscisic acid-activated signaling pathway;GO:0006950//response to stress;GO:0044763;GO:0006464//cellular protein modification process;GO:0031324//negative regulation of cellular metabolic process;GO:0006796//phosphate-containing compound metabolic process;GO:0009737//response…	gi|356563938|ref|XP_003550214.1|;gi|734373231|gb|KHN20160.1|;gi|947055849|gb|KRH05302.1|;gi|571538689|ref|XP_006601194.1|/0;0;0;0/PREDICTED: protein phosphatase 2C 77-like isoform X3 [Glycine max];Protein phosphatase 2C 16 [Glycine soja] ;hypothetical protein GLYMA_17G218700 [Glycine max];PREDICTED: protein phosphatase 2C 77-like isoform X4 [Glycine max]
Glyma.17G237900	-	-	-	-	-	-	-	-	-	-	-	-	-	-	-	-	-1.28069	down	0.000654679	0.00706474	2177	-	-	GO:0005488	GO:0010035//response to inorganic substance;GO:0051707//response to other organism;GO:0001101//response to acid chemical;GO:0009628//response to abiotic stimulus;GO:0009725//response to hormone;GO:0009966//regulation of signal transduction;GO:0006950//response to stress	gi|947056168|gb|KRH05621.1|/3.38894e-144/hypothetical protein GLYMA_17G237900 [Glycine max]
Glyma.17G246500	-	-	-	-	-	-	-	-	-	-	-	-	1.31886	up	0.000493814	0.0241765	2.51887	up	2.71e-09	5.21e-07	2795	ko01100//Metabolic pathways;ko00592//alpha-Linolenic acid metabolism	GO:0009526//plastid envelope;GO:0009534//chloroplast thylakoid	GO:0046906//tetrapyrrole binding;GO:0046914//transition metal ion binding;GO:0016491//oxidoreductase activity;GO:0016836//hydro-lyase activity	GO:0051707//response to other organism;GO:0006631//fatty acid metabolic process;GO:0001101//response to acid chemical;GO:0006950//response to stress	gi|351721547|ref|NP_001236445.1|/0/allene oxide synthase [Glycine max]
Glyma.18G009700	1.38422	up	6.9e-11	7.1e-09	-	-	-	-	-	-	-	-	-	-	-	-	-	-	-	-	3145	ko00010//Glycolysis / Gluconeogenesis;ko01100//Metabolic pathways;ko01110//Biosynthesis of secondary metabolites	GO:0030312//external encapsulating structure;GO:0031981//nuclear lumen;GO:0009536//plastid;GO:0005911//cell-cell junction;GO:0016020//membrane;GO:0043231//intracellular membrane-bounded organelle	GO:0046914//transition metal ion binding;GO:0016903//oxidoreductase activity, acting on the aldehyde or oxo group of donors;GO:0000166//nucleotide binding;GO:0005488	GO:0010038//response to metal ion;GO:0019318//hexose metabolic process;GO:0009617//response to bacterium;GO:0006950//response to stress;GO:0050896//response to stimulus	gi|947047940|gb|KRG97468.1|;gi|358248010|ref|NP_001240046.1|;gi|947047937|gb|KRG97465.1|;gi|947047939|gb|KRG97467.1|/2.43442e-146;0;0;0/hypothetical protein GLYMA_18G009700 [Glycine max];uncharacterized protein LOC100782924 [Glycine max];hypothetical protein GLYMA_18G009700 [Glycine max];hypothetical protein GLYMA_18G009700 [Glycine max]
Glyma.18G043700	1.0456	up	0.00588508	0.0465902	-	-	-	-	-	-	-	-	-	-	-	-	3.30405	up	7.82e-07	4.95e-05	3445	ko00480//Glutathione metabolism	GO:0000325//plant-type vacuole	GO:0043167//ion binding;GO:0016765//transferase activity, transferring alkyl or aryl (other than methyl) groups	GO:0006950//response to stress;GO:0009962//regulation of flavonoid biosynthetic process	gi|359807572|ref|NP_001241411.1|/1.0728e-157/glutathione S-transferase F11-like [Glycine max]
Glyma.18G055300	-1.86573	down	6.03e-09	4.16e-07	-	-	-	-	-	-	-	-	-	-	-	-	-	-	-	-	1252	ko01100//Metabolic pathways;ko01110//Biosynthesis of secondary metabolites;ko00360//Phenylalanine metabolism;ko00940//Phenylpropanoid biosynthesis	-	GO:0003824//catalytic activity;GO:0016209//antioxidant activity;GO:0043169//cation binding;GO:0046906//tetrapyrrole binding	GO:0044710;GO:0006950//response to stress	gi|356565900|ref|XP_003551174.1|/0/PREDICTED: peroxidase 4-like [Glycine max]
Glyma.18G118100	-	-	-	-	-	-	-	-	-	-	-	-	-	-	-	-	1.32268	up	0.00625711	0.0346052	2113	ko00909//Sesquiterpenoid and triterpenoid biosynthesis;ko01100//Metabolic pathways;ko01110//Biosynthesis of secondary metabolites	GO:0031224//intrinsic component of membrane	GO:0016709//oxidoreductase activity, acting on paired donors, with incorporation or reduction of molecular oxygen, NAD(P)H as one donor, and incorporation of one atom of oxygen;GO:0000166//nucleotide binding	GO:0006694//steroid biosynthetic process;GO:0006950//response to stress;GO:0001101//response to acid chemical;GO:0044710	gi|947049536|gb|KRG99064.1|;gi|356569981|ref|XP_003553171.1|;gi|947049537|gb|KRG99065.1|/0;0;0/hypothetical protein GLYMA_18G118100 [Glycine max];PREDICTED: squalene epoxidase 3-like [Glycine max];hypothetical protein GLYMA_18G118100 [Glycine max]
Glyma.18G204000	-	-	-	-	-	-	-	-	-	-	-	-	-	-	-	-	-1.8469	down	6.16e-07	4.14e-05	2159	-	GO:0005911//cell-cell junction;GO:0044432	GO:0003824//catalytic activity	GO:0006950//response to stress;GO:0000904//cell morphogenesis involved in differentiation;GO:0044710	gi|356566692|ref|XP_003551564.1|/0/PREDICTED: dnaJ protein ERDJ3A [Glycine max]
Glyma.18G204200	-	-	-	-	-	-	-	-	-	-	-	-	-	-	-	-	1.55495	up	1.39e-05	0.000446745	2393	ko00010//Glycolysis / Gluconeogenesis;ko01100//Metabolic pathways;ko01110//Biosynthesis of secondary metabolites	GO:0044444	GO:0046872//metal ion binding;GO:0019842//vitamin binding	GO:0006950//response to stress	gi|356568132|ref|XP_003552267.1|/0/PREDICTED: pyruvate decarboxylase 2 [Glycine max]
Glyma.18G215000	-	-	-	-	-	-	-	-	-	-	-	-	-	-	-	-	-1.29314	down	0.000439749	0.00529202	1168	-	GO:0016020//membrane	-	GO:0006950//response to stress;GO:0048229//gametophyte development	gi|359806290|ref|NP_001241475.1|;gi|947050936|gb|KRH00465.1|/2.96668e-150;6.13158e-117/uncharacterized protein LOC100810722 precursor [Glycine max] ;hypothetical protein GLYMA_18G215000 [Glycine max]
Glyma.18G219100	-	-	-	-	-	-	-	-	-	-	-	-	-	-	-	-	1.04107	up	0.00572488	0.0325388	2336	ko00010//Glycolysis / Gluconeogenesis;ko01100//Metabolic pathways;ko01110//Biosynthesis of secondary metabolites;ko00260//Glycine, serine and threonine metabolism	GO:0031967;GO:0009536//plastid;GO:0005911//cell-cell junction;GO:0005576//extracellular region;GO:0016020//membrane	GO:0046914//transition metal ion binding;GO:0004619//phosphoglycerate mutase activity	GO:0010038//response to metal ion;GO:0044763;GO:0048229//gametophyte development;GO:0006091//generation of precursor metabolites and energy;GO:0006006//glucose metabolic process;GO:0006950//response to stress	gi|734420079|gb|KHN40585.1|/0/2,3-bisphosphoglycerate-independent phosphoglycerate mutase [Glycine soja]
Glyma.18G238500	-	-	-	-	-	-	-	-	-	-	-	-	-	-	-	-	-1.35999	down	0.00195466	0.0152319	1650	-	-	GO:0016301//kinase activity	GO:0019751//polyol metabolic process;GO:0006796//phosphate-containing compound metabolic process;GO:0006950//response to stress;GO:0007186//G-protein coupled receptor signaling pathway	gi|947051332|gb|KRH00861.1|;gi|356566923|ref|XP_003551674.1|/0;0/hypothetical protein GLYMA_18G238500 [Glycine max];PREDICTED: sphingoid long-chain bases kinase 2, mitochondrial-like [Glycine max]
Glyma.18G278900	-	-	-	-	-	-	-	-	-	-	-	-	-	-	-	-	2.57163	up	0.00134845	0.011704	2019	ko00330//Arginine and proline metabolism;ko01100//Metabolic pathways;ko01110//Biosynthesis of secondary metabolites	-	GO:0016645//oxidoreductase activity, acting on the CH-NH group of donors	GO:0009617//response to bacterium;GO:0006560//proline metabolic process;GO:0006536//glutamate metabolic process;GO:0006950//response to stress	gi|356568869|ref|XP_003552630.1|/0/PREDICTED: proline dehydrogenase 2, mitochondrial [Glycine max]
Glyma.19G011700	-	-	-	-	-	-	-	-	-	-	-	-	-	-	-	-	8.60825	up	1.84e-05	0.000551059	2324	ko00592//alpha-Linolenic acid metabolism	-	GO:0016209//antioxidant activity;GO:0046906//tetrapyrrole binding	GO:0044710;GO:0006950//response to stress	gi|734382169|gb|KHN23570.1|/0/Prostaglandin G/H synthase 2 [Glycine soja]
Glyma.19G016100	-	-	-	-	-	-	-	-	-3.92769	down	0.000264338	0.0136389	-	-	-	-	-	-	-	-	1822	ko00500//Starch and sucrose metabolism;ko01110//Biosynthesis of secondary metabolites;ko00520//Amino sugar and nucleotide sugar metabolism	-	GO:0016740//transferase activity	GO:0006950//response to stress	gi|356572000|ref|XP_003554158.1|/0/PREDICTED: probable galacturonosyltransferase-like 10 [Glycine max]
Glyma.19G066200	-	-	-	-	-	-	-	-	-	-	-	-	-	-	-	-	2.37898	up	6.23e-05	0.00132437	1166	ko01100//Metabolic pathways;ko01110//Biosynthesis of secondary metabolites;ko00360//Phenylalanine metabolism;ko00940//Phenylpropanoid biosynthesis	-	GO:0003824//catalytic activity;GO:0016209//antioxidant activity;GO:0043169//cation binding;GO:0046906//tetrapyrrole binding	GO:0044710;GO:0006950//response to stress	gi|734305902|gb|KHM98789.1|/0/Peroxidase 44 [Glycine soja]
Glyma.19G091800	-2.97488	down	1.32e-05	0.000382111	-	-	-	-	-	-	-	-	-	-	-	-	-	-	-	-	1509	ko01100//Metabolic pathways;ko01110//Biosynthesis of secondary metabolites;ko00360//Phenylalanine metabolism;ko00940//Phenylpropanoid biosynthesis	-	GO:0003824//catalytic activity;GO:0016209//antioxidant activity;GO:0043169//cation binding;GO:0046906//tetrapyrrole binding	GO:0044710;GO:0006950//response to stress	gi|356571531|ref|XP_003553930.1|/0/PREDICTED: peroxidase 55 [Glycine max]
Glyma.19G105100	-	-	-	-	-1.25001	down	0.000682095	0.0433083	-	-	-	-	2.71529	up	3.54e-11	1.03e-08	-	-	-	-	1531	ko00941//Flavonoid biosynthesis;ko01100//Metabolic pathways;ko01110//Biosynthesis of secondary metabolites;ko04712//Circadian rhythm - plant	GO:0000325//plant-type vacuole	GO:0016746//transferase activity, transferring acyl groups	GO:0009411//response to UV;GO:0060918//auxin transport;GO:0001101//response to acid chemical;GO:0009718//anthocyanin-containing compound biosynthetic process;GO:0009725//response to hormone;GO:0006950//response to stress	gi|356571645|ref|XP_003553986.1|/0/PREDICTED: chalcone synthase J-like [Glycine max]
Glyma.19G172500	-	-	-	-	-	-	-	-	-	-	-	-	-	-	-	-	-1.13277	down	0.00145802	0.0123491	1082	-	GO:0031981//nuclear lumen;GO:0009536//plastid;GO:0044437;GO:0000785//chromatin;GO:0005911//cell-cell junction;GO:0016020//membrane	GO:0003676//nucleic acid binding;GO:0046983//protein dimerization activity	GO:0034728//nucleosome organization;GO:0006950//response to stress	gi|571558188|ref|XP_006604532.1|/6.08435e-89/PREDICTED: histone H4-like [Glycine max]
Glyma.19G181300	-	-	-	-	-	-	-	-	-	-	-	-	-	-	-	-	-2.28208	down	5.65e-07	3.94e-05	1588	-	GO:0031224//intrinsic component of membrane;GO:0005911//cell-cell junction;GO:0009536//plastid	GO:0044389//ubiquitin-like protein ligase binding;GO:0005372//water transmembrane transporter activity	GO:0051707//response to other organism;GO:0042044//fluid transport;GO:0006950//response to stress;GO:0055085//transmembrane transport;GO:0001101//response to acid chemical	gi|947046352|gb|KRG95981.1|;gi|356572440|ref|XP_003554376.1|/3.54333e-159;0/hypothetical protein GLYMA_19G181300 [Glycine max];PREDICTED: aquaporin PIP2-1 [Glycine max]
Glyma.19G240400	-	-	-	-	-	-	-	-	-	-	-	-	-	-	-	-	-1.0373	down	0.00365878	0.0237272	1574	ko04146//Peroxisome	GO:0044424	GO:0043169//cation binding;GO:0016209//antioxidant activity;GO:0003824//catalytic activity	GO:0009642//response to light intensity;GO:0010193//response to ozone;GO:0010224//response to UV-B;GO:0044710;GO:0009651//response to salt stress;GO:0072593//reactive oxygen species metabolic process;GO:0009617//response to bacterium;GO:0009744//response to sucrose;GO:0035194//posttranscriptional gene silencing by RNA;GO:0046688//response to copper ion;GO:0009987//cellular process;GO:0010035//res…	gi|351725359|ref|NP_001235298.1|;gi|947047281|gb|KRG96910.1|;gi|947047280|gb|KRG96909.1|/1.08219e-93;1.44827e-53;8.32826e-66/superoxide dismutase [Cu-Zn] [Glycine max];hypothetical protein GLYMA_19G240400 [Glycine max];hypothetical protein GLYMA_19G240400 [Glycine max]
Glyma.20G017900	5.90078	up	5.72e-14	9.42e-12	-	-	-	-	-	-	-	-	-	-	-	-	-	-	-	-	1145	-	-	-	GO:0006950//response to stress	gi|359807343|ref|NP_001240867.1|/1.92537e-107/MLP-like protein 28-like [Glycine max]
Glyma.20G026700	-	-	-	-	-	-	-	-	-	-	-	-	-	-	-	-	5.10843	up	9.6e-06	0.000337623	3557	ko00500//Starch and sucrose metabolism	-	GO:0043168//anion binding;GO:0004645//phosphorylase activity	GO:0044238//primary metabolic process;GO:0006950//response to stress;GO:0009628//response to abiotic stimulus	gi|571563869|ref|XP_006605545.1|;gi|356577161|ref|XP_003556696.1|/0;0/PREDICTED: alpha-1,4 glucan phosphorylase L-2 isozyme, chloroplastic/amyloplastic-like isoform X2 [Glycine max];PREDICTED: alpha-1,4 glucan phosphorylase L-2 isozyme, chloroplastic/amyloplastic-like isoform X1 [Glycine max]
Glyma.20G053700	-	-	-	-	-	-	-	-	-1.56432	down	0.000270545	0.0138654	-	-	-	-	2.23282	up	0.00967147	0.0467424	3225	ko00591//Linoleic acid metabolism;ko01100//Metabolic pathways;ko00592//alpha-Linolenic acid metabolism	GO:0009532//plastid stroma;GO:0009526//plastid envelope;GO:0009534//chloroplast thylakoid	GO:0046914//transition metal ion binding;GO:0016702//oxidoreductase activity, acting on single donors with incorporation of molecular oxygen, incorporation of two atoms of oxygen;GO:0032550	GO:0051707//response to other organism;GO:0006633//fatty acid biosynthetic process;GO:0055114//oxidation-reduction process;GO:0001101//response to acid chemical;GO:0006950//response to stress	gi|947040160|gb|KRG89884.1|;gi|356575019|ref|XP_003555640.1|/0;0/hypothetical protein GLYMA_20G053700 [Glycine max];PREDICTED: linoleate 13S-lipoxygenase 2-1, chloroplastic-like [Glycine max]
Glyma.20G079300	-	-	-	-	-	-	-	-	-	-	-	-	-1.0971	down	0.000304307	0.0167781	-	-	-	-	2229	ko03018//RNA degradation	GO:0005840//ribosome;GO:0009532//plastid stroma;GO:0009526//plastid envelope;GO:0044437;GO:0044429;GO:0016020//membrane	GO:0032550;GO:0046914//transition metal ion binding	GO:0010038//response to metal ion;GO:0006457//protein folding;GO:0006950//response to stress	gi|734401136|gb|KHN31621.1|/0/Chaperonin CPN60-2, mitochondrial [Glycine soja]
Glyma.20G080000	-1.66613	down	0.000971568	0.0122858	-	-	-	-	-	-	-	-	-	-	-	-	-3.51589	down	4.17e-05	0.000991291	1899	ko00380//Tryptophan metabolism	-	GO:0000166//nucleotide binding;GO:0016709//oxidoreductase activity, acting on paired donors, with incorporation or reduction of molecular oxygen, NAD(P)H as one donor, and incorporation of one atom of oxygen	GO:0009683//indoleacetic acid metabolic process;GO:0006950//response to stress	gi|571565271|ref|XP_003555725.2|/0/PREDICTED: probable indole-3-pyruvate monooxygenase YUCCA7 [Glycine max]
Glyma.20G083800	-	-	-	-	-	-	-	-	-	-	-	-	-	-	-	-	-1.27252	down	0.000644293	0.00699845	1088	-	GO:0031981//nuclear lumen;GO:0009536//plastid;GO:0044437;GO:0000785//chromatin;GO:0005911//cell-cell junction;GO:0016020//membrane	GO:0003676//nucleic acid binding;GO:0046983//protein dimerization activity	GO:0034728//nucleosome organization;GO:0006950//response to stress	gi|475622287|gb|EMT31824.1|/1.35134e-52/Histone H4 [Aegilops tauschii]
Glyma.20G122500	-	-	-	-	-	-	-	-	-	-	-	-	-	-	-	-	1.76847	up	1.93e-06	0.0001	1694	ko00051//Fructose and mannose metabolism;ko00030//Pentose phosphate pathway;ko00010//Glycolysis / Gluconeogenesis;ko01100//Metabolic pathways;ko01110//Biosynthesis of secondary metabolites;ko00710//Carbon fixation in photosynthetic organisms	GO:0031976;GO:0009532//plastid stroma	GO:0016832//aldehyde-lyase activity	GO:0006950//response to stress;GO:0010038//response to metal ion;GO:0006091//generation of precursor metabolites and energy	gi|947041204|gb|KRG90928.1|/0/hypothetical protein GLYMA_20G122500 [Glycine max]
Glyma.20G133200	-	-	-	-	-1.48978	down	0.000798079	0.0495054	-3.19962	down	0.000431705	0.0201627	-	-	-	-	1.3797	up	0.00325715	0.0219927	1580	-	-	-	GO:0009628//response to abiotic stimulus;GO:0006950//response to stress	gi|918463665|gb|ALA09177.1|/2.67846e-160/C2H2-Zn transcription factor, partial [Glycine max]
Glyma.20G169200	-	-	-	-	-	-	-	-	-	-	-	-	1.27701	up	0.00011067	0.00777512	-	-	-	-	1364	ko01100//Metabolic pathways;ko01110//Biosynthesis of secondary metabolites;ko00360//Phenylalanine metabolism;ko00940//Phenylpropanoid biosynthesis	GO:0005911//cell-cell junction;GO:0005618//cell wall	GO:0003824//catalytic activity;GO:0016209//antioxidant activity;GO:0043169//cation binding;GO:0046906//tetrapyrrole binding	GO:0044710;GO:0006950//response to stress	gi|356576075|ref|XP_003556160.1|/0/PREDICTED: peroxidase 12-like [Glycine max]
Glyma.20G197100	-	-	-	-	-	-	-	-	-	-	-	-	-1.03673	down	0.00127334	0.0476143	-	-	-	-	2151	ko03018//RNA degradation	GO:0005840//ribosome;GO:0009532//plastid stroma;GO:0009526//plastid envelope;GO:0044437;GO:0044429;GO:0016020//membrane	GO:0032550;GO:0046914//transition metal ion binding	GO:0010038//response to metal ion;GO:0006457//protein folding;GO:0006950//response to stress	gi|356576411|ref|XP_003556325.1|/0/PREDICTED: chaperonin CPN60-2, mitochondrial [Glycine max]
Glyma.20G210800	-	-	-	-	-	-	-	-	-	-	-	-	-	-	-	-	2.68797	up	0.00052645	0.00603625	1691	ko04140//Regulation of autophagy	-	GO:0004672//protein kinase activity;GO:0032550	GO:0006796//phosphate-containing compound metabolic process;GO:0006950//response to stress;GO:0006464//cellular protein modification process;GO:0007154//cell communication	gi|356576545|ref|XP_003556391.1|/0/PREDICTED: CBL-interacting serine/threonine-protein kinase 4-like [Glycine max]
Glyma.20G230900	-	-	-	-	-	-	-	-	-	-	-	-	-	-	-	-	1.73223	up	0.00694215	0.0370804	2490	-	-	-	GO:0006950//response to stress	gi|947043086|gb|KRG92810.1|;gi|947043085|gb|KRG92809.1|/0;0/hypothetical protein GLYMA_20G230900 [Glycine max];hypothetical protein GLYMA_20G230900 [Glycine max]
Glyma.U033000	-2.56624	down	9.41e-08	4.92e-06	-	-	-	-	-	-	-	-	-	-	-	-	-	-	-	-	2316	ko00062//Fatty acid elongation;ko01110//Biosynthesis of secondary metabolites	GO:0043231//intracellular membrane-bounded organelle	GO:0016746//transferase activity, transferring acyl groups	GO:0009314//response to radiation;GO:0006950//response to stress;GO:0006631//fatty acid metabolic process	gi|947038781|gb|KRG88669.1|/0/hypothetical protein GLYMA_U033000 [Glycine max]

## Sheet: R genes
GeneID	log2Ratio(2mlpa-1/2MWT-1)	Up-Down-Regulation(2mlpa-1/2MWT-1)	P-value	FDR	log2Ratio(2mlpa-2/2MWT-2)	Up-Down-Regulation(2mlpa-2/2MWT-2)	P-value	FDR	log2Ratio(2mlpa-3/2MWT-3)	Up-Down-Regulation(2mlpa-3/2MWT-3)	P-value	FDR	log2Ratio(2mlpa-4/2MWT-4)	Up-Down-Regulation(2mlpa-4/2MWT-4)	P-value	FDR	log2Ratio(2mlpa-5/2MWT-5)	Up-Down-Regulation(2mlpa-5/2MWT-5)			Length	Pathway	GO Component	GO Function	GO Process	Blast nr
Glyma.03G165800	-3.11091	down	3.89716e-06	0.000133705	-	-	-	-	-	-	-	-	-	-	-	-	-	-	-	-	4009	ko04626//Plant-pathogen interaction	GO:0031224//intrinsic component of membrane	GO:0004672//protein kinase activity;GO:0032550	GO:0006468//protein phosphorylation	gi|571445952|ref|XP_003520610.2|/0/PREDICTED: probable LRR receptor-like serine/threonine-protein kinase At4g08850 [Glycine max]
Glyma.16G065700	-4.08783	down	2.47292e-10	2.27246e-08	-5.3886	down	3.67597e-12	7.81578e-10	-5.22938	down	2.01675e-13	6.35069e-11	-3.03346	down	2.23101e-06	0.000284269	-8.63866	down	2.4448e-10	6.57813e-08	4096	ko04626//Plant-pathogen interaction	-	GO:0016301//kinase activity	GO:0016310//phosphorylation	gi|955377186|ref|XP_014624710.1|/0/PREDICTED: probable LRR receptor-like serine/threonine-protein kinase At4g08850 [Glycine max]
Glyma.03G088000	-10.3783	down	3.06011e-31	3.3291e-28	-9.51887	down	1.87772e-20	7.98476e-18	-9.46167	down	1.55827e-21	1.53539e-18	-5.23235	down	1.81218e-11	5.43984e-09	-5.2689	down	7.23275e-09	1.1924e-06	3143	ko04626//Plant-pathogen interaction	-	-	-	gi|571444898|ref|XP_006576646.1|;gi|947117926|gb|KRH66175.1|/0;0/PREDICTED: TMV resistance protein N-like isoform X3 [Glycine max];hypothetical protein GLYMA_03G088000 [Glycine max]
Glyma.09G265700	-	-	-	-	-	-	-	-	-	-	-	-	-	-	-	-	-2.47269	down	0.00335849	0.0223698	3737	ko00230//Purine metabolism;ko00240//Pyrimidine metabolism;ko01100//Metabolic pathways;ko03020//RNA polymerase;ko04626//Plant-pathogen interaction	-	-	-	gi|955342818|ref|XP_014617918.1|/0/PREDICTED: putative disease resistance protein RGA4 [Glycine max]
Glyma.14G206500	-	-	-	-	-	-	-	-	-	-	-	-	-	-	-	-	-2.0492	down	0.00723377	0.0382146	4627	ko04626//Plant-pathogen interaction	-	-	-	gi|734398662|gb|KHN30617.1|/0/Disease resistance protein [Glycine soja]
Glyma.09G215700	-	-	-	-	-	-	-	-	-	-	-	-	-	-	-	-	1.06993	up	0.00208618	0.0159431	2750	ko04075//Plant hormone signal transduction;ko04626//Plant-pathogen interaction	GO:0031224//intrinsic component of membrane	GO:0032550;GO:0004713//protein tyrosine kinase activity	GO:0006468//protein phosphorylation;GO:0071555//cell wall organization;GO:0000902//cell morphogenesis	gi|358248000|ref|NP_001239788.1|;gi|734348233|gb|KHN11811.1|/0;0/LRR receptor-like serine/threonine-protein kinase FEI 1 precursor [Glycine max];LRR receptor-like serine/threonine-protein kinase FEI 1 [Glycine soja]
Glyma.03G075300	-	-	-	-	-	-	-	-	-	-	-	-	-	-	-	-	1.07027	up	0.00772396	0.0400246	5431	ko04626//Plant-pathogen interaction	-	GO:0032550	GO:0050896//response to stimulus	gi|571444675|ref|XP_006576576.1|/0/PREDICTED: TMV resistance protein N-like isoform X1 [Glycine max]
Glyma.01G183400	-	-	-	-	-	-	-	-	-	-	-	-	-	-	-	-	1.21537	up	0.00256648	0.0185313	3041	ko00230//Purine metabolism;ko00240//Pyrimidine metabolism;ko01100//Metabolic pathways;ko03020//RNA polymerase;ko04626//Plant-pathogen interaction	-	GO:0032550	GO:0006950//response to stress	gi|356495456|ref|XP_003516593.1|/0/PREDICTED: probable disease resistance protein At5g66900 [Glycine max]
Glyma.16G033900	-	-	-	-	-	-	-	-	-	-	-	-	-	-	-	-	1.22042	up	0.00321455	0.0218365	3868	ko00230//Purine metabolism;ko00240//Pyrimidine metabolism;ko01100//Metabolic pathways;ko03020//RNA polymerase;ko04626//Plant-pathogen interaction	-	GO:0032550	GO:0006950//response to stress;GO:0007154//cell communication	gi|571525333|ref|XP_006598947.1|;gi|947057200|gb|KRH06606.1|;gi|571525345|ref|XP_006598950.1|/0;0;0/PREDICTED: TMV resistance protein N-like isoform X1 [Glycine max];hypothetical protein GLYMA_16G033900 [Glycine max];PREDICTED: TMV resistance protein N-like isoform X2 [Glycine max]
Glyma.14G074700	-	-	-	-	-	-	-	-	-	-	-	-	-	-	-	-	1.31383	up	0.00711745	0.0377528	4087	ko04626//Plant-pathogen interaction	-	GO:0016301//kinase activity;GO:0032550	GO:0006464//cellular protein modification process	gi|356552103|ref|XP_003544410.1|/0/PREDICTED: probable LRR receptor-like serine/threonine-protein kinase At2g16250 [Glycine max]
Glyma.03G037000	-	-	-	-	-	-	-	-	-	-	-	-	-	-	-	-	1.33316	up	0.0031477	0.0215186	4395	ko00230//Purine metabolism;ko00240//Pyrimidine metabolism;ko01100//Metabolic pathways;ko03020//RNA polymerase;ko04626//Plant-pathogen interaction	-	-	-	gi|356506465|ref|XP_003522002.1|/0/PREDICTED: putative disease resistance RPP13-like protein 1 [Glycine max]
Glyma.01G218800	-	-	-	-	-	-	-	-	-	-	-	-	-	-	-	-	1.36221	up	0.0100726	0.0482042	3590	ko04075//Plant hormone signal transduction;ko04626//Plant-pathogen interaction	GO:0031224//intrinsic component of membrane	GO:0016301//kinase activity;GO:0032550	GO:0006464//cellular protein modification process	gi|947129672|gb|KRH77526.1|;gi|571436477|ref|XP_006573774.1|/0;0/hypothetical protein GLYMA_01G218800 [Glycine max];PREDICTED: probable LRR receptor-like serine/threonine-protein kinase At1g63430 [Glycine max]
Glyma.03G043500	-	-	-	-	-	-	-	-	-	-	-	-	-	-	-	-	1.40762	up	0.00445047	0.0272917	5300	ko00230//Purine metabolism;ko00240//Pyrimidine metabolism;ko01100//Metabolic pathways;ko03020//RNA polymerase;ko04626//Plant-pathogen interaction	-	-	-	gi|955310855|ref|XP_014628981.1|/0/PREDICTED: putative disease resistance protein At3g14460 [Glycine max]
Glyma.06G319700	-	-	-	-	-	-	-	-	-	-	-	-	-	-	-	-	1.42848	up	0.00686753	0.0368382	2068	ko04626//Plant-pathogen interaction	GO:0005618//cell wall;GO:0009536//plastid	GO:0016491//oxidoreductase activity	GO:0009628//response to abiotic stimulus;GO:0008152//metabolic process	gi|351724553|ref|NP_001235526.1|/0/disease resistance protein/LRR protein-related protein precursor [Glycine max]
Glyma.12G135600	-	-	-	-	-	-	-	-	-	-	-	-	-	-	-	-	1.52116	up	3.34365e-05	0.000859912	4421	ko04626//Plant-pathogen interaction	-	-	-	gi|734430980|gb|KHN45708.1|/0/TMV resistance protein N [Glycine soja]
Glyma.08G297400	-	-	-	-	-	-	-	-	-	-	-	-	-	-	-	-	1.52401	up	0.000316714	0.00427295	3139	ko04626//Plant-pathogen interaction	-	GO:0016301//kinase activity;GO:0032550	GO:0006464//cellular protein modification process	gi|955337649|ref|XP_014634833.1|/0/PREDICTED: probable LRR receptor-like serine/threonine-protein kinase At1g14390 [Glycine max]
Glyma.03G043200	-	-	-	-	-	-	-	-	-	-	-	-	-	-	-	-	1.5684	up	0.00751355	0.0392695	3597	ko00230//Purine metabolism;ko00240//Pyrimidine metabolism;ko01100//Metabolic pathways;ko03020//RNA polymerase;ko04626//Plant-pathogen interaction	-	-	-	gi|955310862|ref|XP_006577438.2|/0/PREDICTED: putative disease resistance protein At3g14460 [Glycine max]
Glyma.17G250800	-	-	-	-	-	-	-	-	-	-	-	-	-	-	-	-	1.61735	up	0.00637965	0.0350114	4171	ko04626//Plant-pathogen interaction	-	GO:0016301//kinase activity;GO:0032550	GO:0006464//cellular protein modification process	gi|356562351|ref|XP_003549435.1|/0/PREDICTED: probable LRR receptor-like serine/threonine-protein kinase At2g16250 [Glycine max]
Glyma.01G183300	-	-	-	-	-	-	-	-	-1.92535	down	0.00106096	0.0404079	-	-	-	-	1.61762	up	0.0031795	0.0216788	2893	ko04626//Plant-pathogen interaction	-	-	-	gi|571435938|ref|XP_006573620.1|/0/PREDICTED: probable disease resistance protein At5g66900 [Glycine max]
Glyma.14G079600	-	-	-	-	-	-	-	-	-	-	-	-	-	-	-	-	1.61914	up	0.00121891	0.0109151	2732	ko00230//Purine metabolism;ko00240//Pyrimidine metabolism;ko01100//Metabolic pathways;ko03020//RNA polymerase;ko04626//Plant-pathogen interaction	-	GO:0032550	GO:0009617//response to bacterium;GO:0009628//response to abiotic stimulus;GO:0006950//response to stress	gi|356552172|ref|XP_003544443.1|/0/PREDICTED: probable disease resistance protein At4g33300 [Glycine max]
Glyma.08G259000	-1.14504	down	0.000992153	0.0124945	-	-	-	-	-	-	-	-	-	-	-	-	1.62578	up	0.002462	0.0179542	2737	ko04626//Plant-pathogen interaction	-	-	-	gi|571473175|ref|XP_006585845.1|/0/PREDICTED: putative disease resistance RPP13-like protein 3 [Glycine max]
Glyma.11G072100	-	-	-	-	-	-	-	-	-	-	-	-	-	-	-	-	1.64713	up	0.00409402	0.0257476	4775	ko04626//Plant-pathogen interaction	-	GO:0032550	GO:0006950//response to stress	gi|734423019|gb|KHN41940.1|/0/Disease resistance RPP8-like protein 3 [Glycine soja]
Glyma.03G075200	-	-	-	-	-	-	-	-	-	-	-	-	-	-	-	-	1.67137	up	0.00105737	0.00985209	4750	ko00230//Purine metabolism;ko00240//Pyrimidine metabolism;ko01100//Metabolic pathways;ko03020//RNA polymerase;ko04626//Plant-pathogen interaction	-	GO:0032550	GO:0006950//response to stress	gi|351723333|ref|NP_001237787.1|/0/NB-LRR type disease resistance protein [Glycine max]
Glyma.16G085900	-	-	-	-	-	-	-	-	-	-	-	-	-	-	-	-	1.68542	up	4.79813e-05	0.00109741	5021	ko00230//Purine metabolism;ko00240//Pyrimidine metabolism;ko01100//Metabolic pathways;ko03020//RNA polymerase;ko04626//Plant-pathogen interaction	-	-	GO:0050896//response to stimulus	gi|571526823|ref|XP_003548631.2|;gi|947057991|gb|KRH07397.1|;gi|947057995|gb|KRH07401.1|;gi|734363398|gb|KHN16501.1|/0;0;0;0/PREDICTED: TMV resistance protein N-like [Glycine max];hypothetical protein GLYMA_16G085900 [Glycine max];hypothetical protein GLYMA_16G085900 [Glycine max];TMV resistance protein N [Glycine soja]
Glyma.06G261500	-	-	-	-	-	-	-	-	-	-	-	-	-	-	-	-	1.69889	up	0.00331226	0.0221758	3650	ko00230//Purine metabolism;ko00240//Pyrimidine metabolism;ko01100//Metabolic pathways;ko03020//RNA polymerase;ko04626//Plant-pathogen interaction	-	GO:0032550	GO:0006950//response to stress;GO:0008037//cell recognition;GO:0007154//cell communication	gi|571462237|ref|XP_003526160.2|/0/PREDICTED: TMV resistance protein N-like [Glycine max]
Glyma.11G246200	-	-	-	-	-	-	-	-	-	-	-	-	-	-	-	-	1.71692	up	0.0104781	0.0496542	3308	ko04075//Plant hormone signal transduction;ko04626//Plant-pathogen interaction	-	GO:0004672//protein kinase activity;GO:0032550	GO:0006796//phosphate-containing compound metabolic process;GO:0006464//cellular protein modification process	gi|955351777|ref|XP_014619757.1|;gi|356538111|ref|XP_003537548.1|;gi|947082611|gb|KRH31400.1|;gi|947082608|gb|KRH31397.1|;gi|947082610|gb|KRH31399.1|;gi|947082607|gb|KRH31396.1|/0;0;0;0;0;0/PREDICTED: probable LRR receptor-like serine/threonine-protein kinase At1g67720 isoform X2 [Glycine max];PREDICTED: probable LRR receptor-like serine/threonine-protein kinase At1g67720 isoform X1 [Glycine max]…
Glyma.17G180100	-	-	-	-	-	-	-	-	-2.49848	down	0.000280985	0.0142807	-	-	-	-	1.83128	up	0.000586072	0.00656792	3836	ko00230//Purine metabolism;ko00240//Pyrimidine metabolism;ko01100//Metabolic pathways;ko03020//RNA polymerase;ko04626//Plant-pathogen interaction	-	GO:0032550	GO:0006950//response to stress	gi|571537529|ref|XP_006601011.1|/0/PREDICTED: probable disease resistance protein At5g66900 [Glycine max]
Glyma.U035700	2.43731	up	7.72933e-15	1.44066e-12	1.31096	up	0.000148993	0.0120079	1.15885	up	0.000259344	0.0134722	-	-	-	-	2.00447	up	0.000316351	0.00427295	3324	ko04626//Plant-pathogen interaction	-	GO:0016462//pyrophosphatase activity;GO:0032550;GO:0036094//small molecule binding;GO:1901363;GO:0097159//organic cyclic compound binding	GO:0006950//response to stress;GO:0007154//cell communication	gi|947038010|gb|KRG88494.1|;gi|947038009|gb|KRG88493.1|;gi|947038006|gb|KRG88490.1|;gi|955395634|ref|XP_014628764.1|;gi|947038007|gb|KRG88491.1|;gi|947038002|gb|KRG88486.1|;gi|947038005|gb|KRG88489.1|;gi|947038004|gb|KRG88488.1|;gi|947038003|gb|KRG88487.1|/0;0;0;0;0;0;0;0;0/hypothetical protein GLYMA_U035700, partial [Glycine max];hypothetical protein GLYMA_U035700, partial [Glycine max];hypothet…
Glyma.06G260100	-	-	-	-	-	-	-	-	-	-	-	-	-	-	-	-	2.04977	up	6.58e-05	0.00137242	3893	ko00230//Purine metabolism;ko00240//Pyrimidine metabolism;ko01100//Metabolic pathways;ko03020//RNA polymerase;ko04626//Plant-pathogen interaction	-	GO:0032550	GO:0006950//response to stress;GO:0008037//cell recognition;GO:0007154//cell communication	gi|356517237|ref|XP_003527295.1|/0/PREDICTED: TMV resistance protein N [Glycine max]
Glyma.03G047000	-	-	-	-	-	-	-	-	-	-	-	-	-	-	-	-	2.07611	up	0.00894112	0.0443958	5472	ko00230//Purine metabolism;ko00240//Pyrimidine metabolism;ko01100//Metabolic pathways;ko03020//RNA polymerase;ko04626//Plant-pathogen interaction	-	-	-	gi|955310901|ref|XP_006576474.2|/0/PREDICTED: putative disease resistance RPP13-like protein 1 [Glycine max]
Glyma.06G263900	-	-	-	-	-	-	-	-	-	-	-	-	-	-	-	-	2.24884	up	0.00447737	0.0273738	4654	ko00230//Purine metabolism;ko00240//Pyrimidine metabolism;ko01100//Metabolic pathways;ko03020//RNA polymerase;ko04626//Plant-pathogen interaction	-	-	-	gi|955325893|ref|XP_014632232.1|/0/PREDICTED: disease resistance protein TAO1-like isoform X1 [Glycine max]
Glyma.08G303700	-	-	-	-	-	-	-	-	-	-	-	-	-	-	-	-	2.27129	up	0.00448031	0.027386	4369	ko00230//Purine metabolism;ko00240//Pyrimidine metabolism;ko01100//Metabolic pathways;ko03020//RNA polymerase;ko04626//Plant-pathogen interaction	-	-	-	gi|356524185|ref|XP_003530712.1|/0/PREDICTED: TMV resistance protein N-like isoform X2 [Glycine max]
Glyma.05G082200	-	-	-	-	-	-	-	-	-1.68229	down	0.000434671	0.0202589	-	-	-	-	2.29377	up	0.003137	0.0214712	3498	ko04626//Plant-pathogen interaction	-	GO:0032550	GO:0006950//response to stress	gi|356511730|ref|XP_003524576.1|/0/PREDICTED: probable disease resistance protein At5g66900 isoform X1 [Glycine max]
Glyma.18G050700	-	-	-	-	-	-	-	-	-	-	-	-	-	-	-	-	2.32729	up	0.00103551	0.00974069	3603	ko04626//Plant-pathogen interaction	GO:0031224//intrinsic component of membrane	GO:0004672//protein kinase activity;GO:0032550	GO:0006796//phosphate-containing compound metabolic process;GO:0006464//cellular protein modification process	gi|356569432|ref|XP_003552905.1|/0/PREDICTED: probable LRR receptor-like serine/threonine-protein kinase At1g06840 [Glycine max]
Glyma.16G087100	-	-	-	-	-	-	-	-	-	-	-	-	-	-	-	-	2.42611	up	0.00242063	0.0177383	3617	ko00230//Purine metabolism;ko00240//Pyrimidine metabolism;ko01100//Metabolic pathways;ko03020//RNA polymerase;ko04626//Plant-pathogen interaction	-	GO:0032550	GO:0006950//response to stress;GO:0007154//cell communication;GO:0050896//response to stimulus	gi|571526878|ref|XP_006599163.1|;gi|947058007|gb|KRH07413.1|/0;0/PREDICTED: TMV resistance protein N-like [Glycine max];hypothetical protein GLYMA_16G087100 [Glycine max]
Glyma.12G236500	-	-	-	-	-	-	-	-	-	-	-	-	-	-	-	-	2.42635	up	0.0101426	0.0484631	3554	ko04626//Plant-pathogen interaction	-	-	-	gi|571494846|ref|XP_006592960.1|;gi|571494848|ref|XP_006592961.1|/0;0/PREDICTED: probable disease resistance protein At1g61300 isoform X1 [Glycine max];PREDICTED: probable disease resistance protein At1g61300 isoform X2 [Glycine max]
Glyma.08G301200	-	-	-	-	-	-	-	-	-	-	-	-	-	-	-	-	2.4358	up	0.00107318	0.00993452	4462	ko00230//Purine metabolism;ko00240//Pyrimidine metabolism;ko01100//Metabolic pathways;ko03020//RNA polymerase;ko04626//Plant-pathogen interaction	-	GO:0032550	GO:0006950//response to stress;GO:0007154//cell communication	gi|571473774|ref|XP_006586027.1|/0/PREDICTED: TMV resistance protein N-like isoform X1 [Glycine max]
Glyma.05G082500	-	-	-	-	-	-	-	-	-2.21379	down	0.0009091	0.036204	-	-	-	-	2.48655	up	0.00114304	0.0104089	3736	ko00230//Purine metabolism;ko00240//Pyrimidine metabolism;ko01100//Metabolic pathways;ko03020//RNA polymerase;ko04626//Plant-pathogen interaction	-	GO:0032550	GO:0006950//response to stress	gi|571454745|ref|XP_006579882.1|/0/PREDICTED: probable disease resistance protein At5g66900 [Glycine max]
Glyma.03G043000	-1.35512	down	0.000206606	0.00359165	-	-	-	-	-	-	-	-	-	-	-	-	2.5216	up	0.00369937	0.023898	3748	ko00230//Purine metabolism;ko00240//Pyrimidine metabolism;ko01100//Metabolic pathways;ko03020//RNA polymerase;ko04626//Plant-pathogen interaction	-	-	-	gi|955310860|ref|XP_014628983.1|/0/PREDICTED: putative disease resistance protein At3g14460 [Glycine max]
Glyma.15G230700	-	-	-	-	-	-	-	-	-	-	-	-	-	-	-	-	2.59016	up	0.000684867	0.00729119	4001	ko00230//Purine metabolism;ko00240//Pyrimidine metabolism;ko01100//Metabolic pathways;ko03020//RNA polymerase;ko04626//Plant-pathogen interaction	-	GO:0032550	GO:0006950//response to stress	gi|571520977|ref|XP_006598091.1|;gi|947064056|gb|KRH13317.1|/0;0/PREDICTED: putative disease resistance protein At3g14460 isoform X1 [Glycine max];hypothetical protein GLYMA_15G230700 [Glycine max]
Glyma.17G167600	-	-	-	-	-	-	-	-	-	-	-	-	1.08213	up	0.000557229	0.0261194	2.65017	up	0.000205494	0.00313887	2795	ko04075//Plant hormone signal transduction;ko04626//Plant-pathogen interaction	GO:0016020//membrane	GO:0016301//kinase activity	GO:0044237//cellular metabolic process	gi|356563574|ref|XP_003550036.1|/0/PREDICTED: probable LRR receptor-like serine/threonine-protein kinase At4g37250 [Glycine max]
Glyma.09G210600	-	-	-	-	-	-	-	-	-	-	-	-	-	-	-	-	2.82882	up	0.00114987	0.0104544	3243	ko04626//Plant-pathogen interaction	-	GO:0032550	GO:0006950//response to stress	gi|947090963|gb|KRH39628.1|;gi|356531473|ref|XP_003534302.1|/0;0/hypothetical protein GLYMA_09G210600 [Glycine max];PREDICTED: disease resistance protein RPM1-like [Glycine max]
Glyma.17G245500	-	-	-	-	-	-	-	-	-	-	-	-	-	-	-	-	2.83107	up	0.00241885	0.0177347	2929	ko00230//Purine metabolism;ko00240//Pyrimidine metabolism;ko01100//Metabolic pathways;ko03020//RNA polymerase;ko04626//Plant-pathogen interaction	-	GO:0032550	GO:0009617//response to bacterium;GO:0009628//response to abiotic stimulus;GO:0006950//response to stress	gi|356564213|ref|XP_003550350.1|/0/PREDICTED: probable disease resistance protein At4g33300 [Glycine max]
Glyma.18G281500	-	-	-	-	-	-	-	-	-	-	-	-	-	-	-	-	2.93243	up	0.00025959	0.00369633	4414	ko04626//Plant-pathogen interaction	-	-	-	gi|955383602|ref|XP_014626225.1|/0/PREDICTED: probable disease resistance protein At5g47250 isoform X1 [Glycine max]
Glyma.06G267300	-	-	-	-	-	-	-	-	-	-	-	-	-	-	-	-	3.01267	up	0.00389649	0.0248304	3171	ko04626//Plant-pathogen interaction	-	GO:0032550	GO:0006950//response to stress;GO:0007154//cell communication	gi|351722777|ref|NP_001235720.1|/0/resistance protein KR3 [Glycine max]
Glyma.02G150600	-	-	-	-	-	-	-	-	-	-	-	-	-	-	-	-	3.0682	up	0.00046357	0.00550137	2237	ko04075//Plant hormone signal transduction;ko04626//Plant-pathogen interaction	-	GO:0004672//protein kinase activity;GO:0032550	GO:0006464//cellular protein modification process	gi|356502836|ref|XP_003520221.1|/0/PREDICTED: probable LRR receptor-like serine/threonine-protein kinase RKF3 [Glycine max]
Glyma.16G214900	4.65642	up	9.35532e-30	9.01452e-27	3.54707	up	1.77741e-10	3.22709e-08	3.92223	up	3.42945e-16	1.66274e-13	3.89277	up	1.62578e-15	9.47352e-13	3.15223	up	2.28974e-05	0.000646591	2927	ko04626//Plant-pathogen interaction	-	GO:0032550;GO:0016462//pyrophosphatase activity	GO:0050896//response to stimulus;GO:0006950//response to stress;GO:0007154//cell communication	gi|947060016|gb|KRH09422.1|;gi|571530234|ref|XP_006599700.1|;gi|947060020|gb|KRH09426.1|/0;0;0/hypothetical protein GLYMA_16G214900 [Glycine max];PREDICTED: TMV resistance protein N-like isoform X4 [Glycine max];hypothetical protein GLYMA_16G214900 [Glycine max]
Glyma.18G086600	-	-	-	-	-	-	-	-	-	-	-	-	-	-	-	-	3.16077	up	5.28e-05	0.00117216	3221	ko04626//Plant-pathogen interaction	-	GO:0032550	GO:0006950//response to stress	gi|955384422|ref|XP_014626398.1|/0/PREDICTED: disease resistance protein RPM1-like [Glycine max]
Glyma.03G046500	-1.44831	down	0.000234256	0.003968	-	-	-	-	1.29715	up	0.00065108	0.0277755	-	-	-	-	3.19249	up	9.49634e-05	0.00180563	3498	ko00230//Purine metabolism;ko00240//Pyrimidine metabolism;ko01100//Metabolic pathways;ko03020//RNA polymerase;ko04626//Plant-pathogen interaction	-	-	-	gi|955310888|ref|XP_006577442.2|/0/PREDICTED: putative disease resistance RPP13-like protein 1 [Glycine max]
Glyma.16G210600	-	-	-	-	-	-	-	-	-	-	-	-	-	-	-	-	3.33939	up	0.00524479	0.0305341	4549	ko00230//Purine metabolism;ko00240//Pyrimidine metabolism;ko01100//Metabolic pathways;ko03020//RNA polymerase;ko04626//Plant-pathogen interaction	-	GO:0032550;GO:0016462//pyrophosphatase activity	GO:0050896//response to stimulus;GO:0006950//response to stress;GO:0007154//cell communication	gi|356559997|ref|XP_003548282.1|;gi|947059928|gb|KRH09334.1|;gi|947059927|gb|KRH09333.1|/0;0;0/PREDICTED: TMV resistance protein N [Glycine max];hypothetical protein GLYMA_16G210600 [Glycine max];hypothetical protein GLYMA_16G210600 [Glycine max]
Glyma.06G256000	-	-	-	-	-	-	-	-	-	-	-	-	-	-	-	-	3.37412	up	1.43168e-05	0.000456235	4316	ko00230//Purine metabolism;ko00240//Pyrimidine metabolism;ko01100//Metabolic pathways;ko03020//RNA polymerase;ko04626//Plant-pathogen interaction	-	GO:0032550	GO:0006950//response to stress;GO:0008037//cell recognition;GO:0007154//cell communication;GO:0050896//response to stimulus	gi|947107062|gb|KRH55445.1|;gi|947107064|gb|KRH55447.1|;gi|955325788|ref|XP_014632205.1|;gi|947107067|gb|KRH55450.1|;gi|947107063|gb|KRH55446.1|;gi|955325790|ref|XP_014632206.1|/0;0;0;0;0;0/hypothetical protein GLYMA_06G256000 [Glycine max];hypothetical protein GLYMA_06G256000 [Glycine max];PREDICTED: disease resistance-like protein CSA1 isoform X1 [Glycine max];hypothetical protein GLYMA_06G2560…
Glyma.15G168500	-	-	-	-	-	-	-	-	-	-	-	-	-	-	-	-	3.41448	up	8.30121e-05	0.00163985	3138	ko04626//Plant-pathogen interaction	-	GO:0016462//pyrophosphatase activity;GO:0032550	GO:0006950//response to stress;GO:0008152//metabolic process	gi|571513784|ref|XP_006596935.1|;gi|351727306|ref|NP_001237924.1|/0;0/PREDICTED: CC-NBS-LRR class disease resistance protein isoform X1 [Glycine max];CC-NBS-LRR class disease resistance protein [Glycine max]
Glyma.07G037000	-	-	-	-	-	-	-	-	-	-	-	-	-	-	-	-	3.45257	up	0.0015209	0.0127021	3965	ko04626//Plant-pathogen interaction	-	GO:0032550	GO:0006950//response to stress;GO:0007154//cell communication	gi|571464738|ref|XP_006583154.1|;gi|947099087|gb|KRH47579.1|/0;0/PREDICTED: disease resistance protein RML1A-like [Glycine max];hypothetical protein GLYMA_07G037000 [Glycine max]
Glyma.14G079500	-	-	-	-	-	-	-	-	-	-	-	-	-	-	-	-	3.46527	up	0.000457172	0.00545109	3226	ko00230//Purine metabolism;ko00240//Pyrimidine metabolism;ko01100//Metabolic pathways;ko03020//RNA polymerase;ko04626//Plant-pathogen interaction	-	GO:0032550	GO:0009617//response to bacterium;GO:0009628//response to abiotic stimulus;GO:0006950//response to stress	gi|947066147|gb|KRH15290.1|;gi|571508169|ref|XP_003544442.2|/0;0/hypothetical protein GLYMA_14G079500 [Glycine max];PREDICTED: probable disease resistance protein At4g33300 [Glycine max]
Glyma.06G265000	-	-	-	-	-	-	-	-	-	-	-	-	-	-	-	-	3.47598	up	0.000511118	0.00589947	3933	ko04626//Plant-pathogen interaction	-	-	-	gi|955326975|ref|XP_014632562.1|/0/PREDICTED: disease resistance protein TAO1-like [Glycine max]
Glyma.14G061200	-	-	-	-	-	-	-	-	-3.40964	down	0.000871461	0.03521	-	-	-	-	3.54047	up	1.14e-05	0.000383288	1734	-	-	-	GO:0006950//response to stress	gi|571507539|ref|XP_003545237.2|/0/PREDICTED: nematode resistance protein-like HSPRO2 [Glycine max]
Glyma.16G210800	-	-	-	-	-	-	-	-	-	-	-	-	-	-	-	-	3.60977	up	0.000244135	0.00353451	4638	ko00230//Purine metabolism;ko00240//Pyrimidine metabolism;ko01100//Metabolic pathways;ko03020//RNA polymerase;ko04626//Plant-pathogen interaction	-	GO:0032550;GO:0036094//small molecule binding;GO:1901363;GO:0097159//organic cyclic compound binding;GO:0016462//pyrophosphatase activity	GO:0050896//response to stimulus;GO:0006950//response to stress;GO:0007154//cell communication	gi|947059932|gb|KRH09338.1|;gi|947059931|gb|KRH09337.1|;gi|351724311|ref|NP_001237821.1|/0;0;0/hypothetical protein GLYMA_16G210800 [Glycine max];hypothetical protein GLYMA_16G210800 [Glycine max];candidate disease-resistance protein [Glycine max]
Glyma.11G075200	-	-	-	-	-	-	-	-	-	-	-	-	-	-	-	-	3.70245	up	2.5336e-05	0.000696659	4641	ko04626//Plant-pathogen interaction	GO:0031224//intrinsic component of membrane	GO:0004672//protein kinase activity;GO:0032550	GO:0006796//phosphate-containing compound metabolic process;GO:0006464//cellular protein modification process	gi|955349679|ref|XP_014619378.1|/0/PREDICTED: probable LRR receptor-like serine/threonine-protein kinase At4g36180 [Glycine max]
Glyma.16G086700	-	-	-	-	-	-	-	-	-	-	-	-	-	-	-	-	3.72714	up	0.000349053	0.00456249	3682	ko00230//Purine metabolism;ko00240//Pyrimidine metabolism;ko01100//Metabolic pathways;ko03020//RNA polymerase;ko04626//Plant-pathogen interaction	-	GO:0032550	GO:0006950//response to stress;GO:0007154//cell communication	gi|571526864|ref|XP_006599159.1|/0/PREDICTED: TMV resistance protein N-like [Glycine max]
Glyma.08G235900	-	-	-	-	-	-	-	-	-	-	-	-	-	-	-	-	3.84501	up	0.00737639	0.0387159	3545	ko04075//Plant hormone signal transduction;ko04626//Plant-pathogen interaction	-	GO:0004672//protein kinase activity;GO:0032550	GO:0006464//cellular protein modification process	gi|356526421|ref|XP_003531816.1|/0/PREDICTED: probable LRR receptor-like serine/threonine-protein kinase At1g56130 isoform X1 [Glycine max]
Glyma.07G127100	-	-	-	-	-	-	-	-	-	-	-	-	-	-	-	-	4.01405	up	1.43133e-05	0.000456235	3329	ko04626//Plant-pathogen interaction	-	GO:0004672//protein kinase activity;GO:0032550	GO:0006796//phosphate-containing compound metabolic process;GO:0006464//cellular protein modification process	gi|571463975|ref|XP_006582888.1|;gi|955328256|ref|XP_014632820.1|/0;0/PREDICTED: probable LRR receptor-like serine/threonine-protein kinase At4g29180-like isoform X1 [Glycine max];PREDICTED: probable LRR receptor-like serine/threonine-protein kinase At4g29180-like isoform X2 [Glycine max]
Glyma.16G006400	-	-	-	-	-	-	-	-	-	-	-	-	-	-	-	-	4.05615	up	8.1037e-05	0.00160933	3809	ko00230//Purine metabolism;ko00240//Pyrimidine metabolism;ko01100//Metabolic pathways;ko03020//RNA polymerase;ko04626//Plant-pathogen interaction	-	GO:0032550	GO:0006950//response to stress;GO:0007154//cell communication	gi|571524432|ref|XP_006598818.1|;gi|947056747|gb|KRH06153.1|/0;0/PREDICTED: putative disease resistance protein At4g11170 [Glycine max];hypothetical protein GLYMA_16G006400 [Glycine max]
Glyma.07G078000	-	-	-	-	-	-	-	-	-	-	-	-	-	-	-	-	4.40047	up	0.000153201	0.00254927	3561	ko04626//Plant-pathogen interaction	-	GO:0036094//small molecule binding;GO:0097159//organic cyclic compound binding;GO:1901363	-	gi|955328410|ref|XP_014632873.1|/0/PREDICTED: disease resistance protein RPS2-like [Glycine max]
Glyma.16G137200	1.91235	up	0.000121154	0.00232287	-	-	-	-	-	-	-	-	-	-	-	-	4.77561	up	7.65878e-06	0.000283683	1648	ko04626//Plant-pathogen interaction	-	-	-	gi|955374835|ref|XP_003547976.2|/0/PREDICTED: TMV resistance protein N [Glycine max]
Glyma.16G213700	-	-	-	-	-	-	-	-	-	-	-	-	-	-	-	-	4.79466	up	3.84883e-08	4.92254e-06	3445	ko04626//Plant-pathogen interaction	-	GO:0032550	GO:0006950//response to stress;GO:0007154//cell communication;GO:0050896//response to stimulus	gi|571530198|ref|XP_006599690.1|;gi|571530196|ref|XP_006599689.1|;gi|955374931|ref|XP_014624138.1|/0;0;0/PREDICTED: TMV resistance protein N-like isoform X2 [Glycine max];PREDICTED: TMV resistance protein N-like isoform X1 [Glycine max];PREDICTED: TMV resistance protein N-like isoform X3 [Glycine max]
Glyma.12G011700	-	-	-	-	-	-	-	-	-	-	-	-	-	-	-	-	4.85284	up	5.66714e-12	2.64971e-09	3539	ko04626//Plant-pathogen interaction	-	-	-	gi|571491619|ref|XP_006591996.1|/0/PREDICTED: disease resistance protein RPP13-like [Glycine max]
Glyma.16G159700	2.02261	up	8.96e-05	0.00182917	-	-	-	-	-	-	-	-	-	-	-	-	4.85712	up	3.48e-05	0.000885028	3395	ko00230//Purine metabolism;ko00240//Pyrimidine metabolism;ko01100//Metabolic pathways;ko03020//RNA polymerase	-	GO:0016462//pyrophosphatase activity;GO:0032550	GO:0006950//response to stress;GO:0007154//cell communication	gi|571528807|ref|XP_006599456.1|/0/PREDICTED: TMV resistance protein N-like [Glycine max]
Glyma.09G099900	-	-	-	-	-	-	-	-	-	-	-	-	-	-	-	-	4.98321	up	1.3276e-11	5.73703e-09	3235	ko04075//Plant hormone signal transduction;ko04626//Plant-pathogen interaction	-	GO:0004672//protein kinase activity;GO:0032550	GO:0006464//cellular protein modification process	gi|955340766|ref|XP_006587157.2|;gi|955340768|ref|XP_014617538.1|/0;0/PREDICTED: probable LRR receptor-like serine/threonine-protein kinase At1g56130 isoform X1 [Glycine max];PREDICTED: probable LRR receptor-like serine/threonine-protein kinase At1g56130 isoform X2 [Glycine max]
Glyma.16G137600	3.06089	up	4.25544e-05	0.000996631	2.32125	up	3.35776e-06	0.000380759	-	-	-	-	3.371	up	2.25875e-06	0.000285641	6.77516	up	1.60068e-16	1.63046e-13	3555	ko00230//Purine metabolism;ko00240//Pyrimidine metabolism;ko01100//Metabolic pathways;ko03020//RNA polymerase;ko04626//Plant-pathogen interaction	-	-	GO:0050896//response to stimulus	gi|955374830|ref|XP_003548883.2|/0/PREDICTED: TMV resistance protein N-like [Glycine max]
Glyma.09G048300	-1.28976	down	9.82511e-12	1.13089e-09	-	-	-	-	-	-	-	-	-	-	-	-	-	-	-	-	4435	ko04626//Plant-pathogen interaction	GO:0016020//membrane	GO:0036094//small molecule binding;GO:0004672//protein kinase activity;GO:1901363;GO:0097159//organic cyclic compound binding	GO:0006796//phosphate-containing compound metabolic process	gi|571476366|ref|XP_003533521.2|/0/PREDICTED: LRR receptor-like serine/threonine-protein kinase GSO1 [Glycine max]
Glyma.09G216400	-	-	-	-	8.34377	up	3.44169e-12	7.36612e-10	-	-	-	-	-	-	-	-	-	-	-	-	4263	ko04626//Plant-pathogen interaction	GO:0031224//intrinsic component of membrane	GO:0004672//protein kinase activity;GO:0032550;GO:0016301//kinase activity	GO:0006796//phosphate-containing compound metabolic process;GO:0006464//cellular protein modification process	gi|947091060|gb|KRH39725.1|;gi|571478728|ref|XP_006587651.1|/0;0/hypothetical protein GLYMA_09G216400 [Glycine max];PREDICTED: probable LRR receptor-like serine/threonine-protein kinase At3g47570 isoform X2 [Glycine max]
Glyma.10G263200	-	-	-	-	-	-	-	-	1.04849	up	0.000867456	0.0350946	1.62627	up	2.85088e-07	4.7068e-05	-	-	-	-	1670	ko04626//Plant-pathogen interaction	-	-	-	gi|356536184|ref|XP_003536619.1|/0/PREDICTED: probable LRR receptor-like serine/threonine-protein kinase At4g20940 [Glycine max]
Glyma.11G045700	-	-	-	-	-	-	-	-	-	-	-	-	1.34784	up	3.22854e-05	0.00287367	-	-	-	-	1666	ko04075//Plant hormone signal transduction;ko04626//Plant-pathogen interaction	-	-	-	gi|359806711|ref|NP_001241548.1|/1.26439e-162/LRR receptor-like serine/threonine-protein kinase GSO2-like precursor [Glycine max]
Glyma.11G073800	-	-	-	-	-	-	-	-	-	-	-	-	1.5327	up	1.36104e-06	0.000187256	-	-	-	-	1986	ko04626//Plant-pathogen interaction	-	-	-	gi|359807401|ref|NP_001241130.1|/0/LRR receptor-like serine/threonine-protein kinase GSO1-like precursor [Glycine max]
Glyma.20G050700	-1.32437	down	6.58e-05	0.00141392	-	-	-	-	-	-	-	-	-	-	-	-	-	-	-	-	4266	ko00230//Purine metabolism;ko00240//Pyrimidine metabolism;ko01100//Metabolic pathways;ko03020//RNA polymerase;ko04626//Plant-pathogen interaction	-	GO:0032550	GO:0006950//response to stress	gi|947040118|gb|KRG89842.1|;gi|356577440|ref|XP_003556833.1|/0;0/hypothetical protein GLYMA_20G050700 [Glycine max];PREDICTED: putative disease resistance RPP13-like protein 1 isoform X1 [Glycine max]
Glyma.15G127100	-1.82835	down	3.99e-05	0.000945308	-	-	-	-	-	-	-	-	-	-	-	-	-	-	-	-	3857	ko00230//Purine metabolism;ko00240//Pyrimidine metabolism;ko01100//Metabolic pathways;ko03020//RNA polymerase;ko04626//Plant-pathogen interaction	-	GO:0032550	GO:0006950//response to stress	gi|571522550|ref|XP_006598349.1|/0/PREDICTED: putative disease resistance protein RGA3 [Glycine max]
Glyma.13G190800	-2.64195	down	0.0003291	0.0052402	-	-	-	-	-	-	-	-	-	-	-	-	-	-	-	-	6542	ko00230//Purine metabolism;ko00240//Pyrimidine metabolism;ko01100//Metabolic pathways;ko03020//RNA polymerase;ko04626//Plant-pathogen interaction	-	GO:0032550	GO:0006950//response to stress	gi|351724721|ref|NP_001237835.1|/0/disease resistance protein [Glycine max]
Glyma.13G071900	-1.78037	down	2.9e-06	0.000103564	-	-	-	-	-	-	-	-	-	-	-	-	-	-	-	-	4266	ko00230//Purine metabolism;ko00240//Pyrimidine metabolism;ko01100//Metabolic pathways;ko03020//RNA polymerase;ko04626//Plant-pathogen interaction	-	GO:0032550	GO:0006950//response to stress	gi|356550917|ref|XP_003543829.1|/0/PREDICTED: putative disease resistance RPP13-like protein 1 [Glycine max]
Glyma.05G082400	-	-	-	-	-	-	-	-	-1.28471	down	9.66941e-05	0.00579122	-	-	-	-	-	-	-	-	2976	ko00230//Purine metabolism;ko00240//Pyrimidine metabolism;ko01100//Metabolic pathways;ko03020//RNA polymerase;ko04626//Plant-pathogen interaction	-	GO:0032550	GO:0006950//response to stress	gi|571454747|ref|XP_006579883.1|/0/PREDICTED: probable disease resistance protein At5g66900 [Glycine max]
Glyma.02G041800	-1.03312	down	0.00533409	0.043181	-	-	-	-	-	-	-	-	-	-	-	-	-	-	-	-	4056	ko04626//Plant-pathogen interaction	-	GO:0032550	GO:0006950//response to stress;GO:0007154//cell communication	gi|571438700|ref|XP_006574650.1|;gi|571438704|ref|XP_006574651.1|/0;0/PREDICTED: TMV resistance protein N-like isoform X1 [Glycine max];PREDICTED: TMV resistance protein N-like isoform X2 [Glycine max]
Glyma.01G039000	-1.50558	down	0.000133001	0.00249287	-	-	-	-	-	-	-	-	-	-	-	-	-	-	-	-	4612	ko04626//Plant-pathogen interaction	-	GO:0016462//pyrophosphatase activity;GO:0032550	GO:0006950//response to stress;GO:0007154//cell communication	gi|571434029|ref|XP_006573080.1|;gi|947126871|gb|KRH74725.1|/0;0/PREDICTED: TMV resistance protein N-like [Glycine max];hypothetical protein GLYMA_01G039000 [Glycine max]
Glyma.01G010500	-	-	-	-	-	-	-	-	-3.51484	down	1.76681e-05	0.001288	-	-	-	-	-	-	-	-	3423	ko04626//Plant-pathogen interaction	-	GO:0032550	GO:0006950//response to stress	gi|351721361|ref|NP_001235671.1|/0/NBS-LRR type disease resistance protein [Glycine max]
Glyma.02G030500	1.34889	up	0.00401401	0.0350979	-	-	-	-	-	-	-	-	-	-	-	-	-	-	-	-	1808	ko00230//Purine metabolism;ko00240//Pyrimidine metabolism;ko01100//Metabolic pathways;ko03020//RNA polymerase;ko04626//Plant-pathogen interaction	-	-	-	gi|734394680|gb|KHN28666.1|/0/Disease resistance RPP13-like protein 4 [Glycine soja]
Glyma.03G037300	-1.72408	down	8.07515e-05	0.00168108	-	-	-	-	-	-	-	-	-	-	-	-	-	-	-	-	4743	ko00230//Purine metabolism;ko00240//Pyrimidine metabolism;ko01100//Metabolic pathways;ko03020//RNA polymerase;ko04626//Plant-pathogen interaction	-	-	-	gi|571444245|ref|XP_006576452.1|/0/PREDICTED: putative disease resistance protein At3g14460 isoform X1 [Glycine max]
Glyma.08G317400	-1.28099	down	0.00405617	0.0353382	-	-	-	-	-	-	-	-	-	-	-	-	-	-	-	-	4364	ko04626//Plant-pathogen interaction	-	-	-	gi|955337909|ref|XP_014634887.1|/0/PREDICTED: disease resistance protein RPM1-like [Glycine max]
Glyma.13G184800	-1.6136	down	2.18186e-06	8.06834e-05	-	-	-	-	-1.74789	down	0.000349474	0.0171619	-1.99492	down	1.42174e-05	0.00145194	-	-	-	-	4261	ko00230//Purine metabolism;ko00240//Pyrimidine metabolism;ko01100//Metabolic pathways;ko03020//RNA polymerase;ko04626//Plant-pathogen interaction	-	-	-	gi|955358201|ref|XP_014621131.1|/0/PREDICTED: putative disease resistance protein At3g14460 isoform X1 [Glycine max]
Glyma.13G195600	-1.40965	down	0.0031794	0.0296366	-	-	-	-	-	-	-	-	-	-	-	-	-	-	-	-	3826	ko00230//Purine metabolism;ko00240//Pyrimidine metabolism;ko01100//Metabolic pathways;ko03020//RNA polymerase;ko04626//Plant-pathogen interaction	-	-	-	gi|356546346|ref|XP_003541587.1|/0/PREDICTED: putative disease resistance RPP13-like protein 1 isoform X1 [Glycine max]
Glyma.14G186600	-1.51493	down	0.00611772	0.0478701	-	-	-	-	-	-	-	-	-	-	-	-	-	-	-	-	4349	ko04626//Plant-pathogen interaction	-	-	-	gi|571511306|ref|XP_006596398.1|/0/PREDICTED: probable disease resistance protein At4g27220 [Glycine max]
Glyma.14G199400	-2.73449	down	3.52877e-10	3.09111e-08	-	-	-	-	-	-	-	-	-	-	-	-	-	-	-	-	2634	ko04626//Plant-pathogen interaction	-	-	-	gi|955362015|ref|XP_014622020.1|/0/PREDICTED: disease resistance protein RPP13-like [Glycine max]
Glyma.18G281700	1.61515	up	0.00244083	0.0243829	-	-	-	-	-	-	-	-	-	-	-	-	-	-	-	-	4047	ko04626//Plant-pathogen interaction	-	-	-	gi|571549792|ref|XP_003551801.2|/0/PREDICTED: probable disease resistance protein At4g27220 [Glycine max]
Glyma.18G287000	-	-	-	-	-2.34846	down	5.02168e-05	0.00450807	-	-	-	-	-	-	-	-	-	-	-	-	3158	ko04626//Plant-pathogen interaction	-	-	-	gi|571549977|ref|XP_006603027.1|/0/PREDICTED: disease resistance protein RPP13-like [Glycine max]
Glyma.16G212300	-1.85578	down	0.000242423	0.00408738	-	-	-	-	-	-	-	-	-	-	-	-	-	-	-	-	3786	ko00230//Purine metabolism;ko00240//Pyrimidine metabolism;ko01100//Metabolic pathways;ko03020//RNA polymerase	-	GO:0016462//pyrophosphatase activity;GO:0032550	GO:0006950//response to stress;GO:0007154//cell communication	gi|358248732|ref|NP_001239675.1|/0/TMV resistance protein N-like [Glycine max]
