# Supplementary material for: Transcriptome analysis identifies differentially expressed genes involved in the metabolic regulatory network of progenies from the cross of low phytic acid GmMIPS1 and GmIPK1 soybean mutants
Source: Research Square preprint supplement (doi:10.21203/rs.3.rs-112462/v1), 2020-12-01
Supplement: Supplementary file 10 [file 5db5db020ef56c32840130cd.xlsx]

## Sheet: Sheet1
GeneID	log2Ratio(2mlpa-1/2MWT-1)	Up-Down-Regulation(2mlpa-1/2MWT-1)	P-value	FDR	log2Ratio(2mlpa-2/2MWT-2)	Up-Down-Regulation(2mlpa-2/2MWT-2)	P-value	FDR	log2Ratio(2mlpa-3/2MWT-3)	Up-Down-Regulation(2mlpa-3/2MWT-3)	P-value	FDR	log2Ratio(2mlpa-4/2MWT-4)	Up-Down-Regulation(2mlpa-4/2MWT-4)	P-value	FDR	log2Ratio(2mlpa-5/2MWT-5)	Up-Down-Regulation(2mlpa-5/2MWT-5)			Length	Pathway	GO Component	GO Function	GO Process	Blast nr
Glyma.01G007300	1.24442	up	0.00118516	0.0142291	-	-	-	-	-	-	-	-	-	-	-	-	-	-	-	-	2189	ko00051//Fructose and mannose metabolism;ko00500//Starch and sucrose metabolism;ko00010//Glycolysis / Gluconeogenesis;ko01100//Metabolic pathways;ko01110//Biosynthesis of secondary metabolites;ko00520//Amino sugar and nucleotide sugar metabolism;ko00052//Galactose metabolism	GO:0044437;GO:0031306//intrinsic component of mitochondrial outer membrane	GO:0046914//transition metal ion binding;GO:0032550;GO:0004396//hexokinase activity	GO:0006833//water transport;GO:0010118//stomatal movement;GO:0016310//phosphorylation;GO:0006091//generation of precursor metabolites and energy;GO:0009757//hexose mediated signaling;GO:0019318//hexose metabolic process;GO:0008219//cell death	gi|356495847|ref|XP_003516783.1|/0/PREDICTED: hexokinase-1-like [Glycine max]
Glyma.01G209500	1.13084	up	3.16906e-05	0.000778562	-	-	-	-	-	-	-	-	-	-	-	-	-	-	-	-	1443	ko00040//Pentose and glucuronate interconversions;ko00500//Starch and sucrose metabolism;ko01100//Metabolic pathways	GO:0030312//external encapsulating structure	GO:0052689//carboxylic ester hydrolase activity	GO:0071555//cell wall organization	gi|356497141|ref|XP_003517421.1|/0/PREDICTED: probable pectinesterase 68 [Glycine max]
Glyma.02G186800	-1.45738	down	4.15791e-07	1.88423e-05	-	-	-	-	-1.4823	down	0.00068539	0.0289962	-	-	-	-	-	-	-	-	1926	ko00500//Starch and sucrose metabolism;ko01100//Metabolic pathways;ko01110//Biosynthesis of secondary metabolites;ko00460//Cyanoamino acid metabolism;ko00940//Phenylpropanoid biosynthesis	GO:0005911//cell-cell junction;GO:0005618//cell wall	GO:0016798//hydrolase activity, acting on glycosyl bonds	GO:0044238//primary metabolic process	gi|734320135|gb|KHN03708.1|/0/Lysosomal beta glucosidase [Glycine soja]
Glyma.02G272100	-1.21648	down	3.17976e-06	0.000111939	-	-	-	-	-	-	-	-	-	-	-	-	-	-	-	-	2421	ko00500//Starch and sucrose metabolism;ko01100//Metabolic pathways;ko01110//Biosynthesis of secondary metabolites;ko00460//Cyanoamino acid metabolism;ko00940//Phenylpropanoid biosynthesis	GO:0005911//cell-cell junction;GO:0005618//cell wall	GO:0016798//hydrolase activity, acting on glycosyl bonds	GO:0044238//primary metabolic process	gi|955308958|ref|XP_014625681.1|;gi|947125214|gb|KRH73420.1|;gi|955308961|ref|XP_014625684.1|/0;0;0/PREDICTED: beta-glucosidase BoGH3B-like isoform X1 [Glycine max];hypothetical protein GLYMA_02G272100 [Glycine max];PREDICTED: beta-glucosidase BoGH3B-like isoform X3 [Glycine max]
Glyma.03G214600	-3.64271	down	2.08469e-07	1.00725e-05	-	-	-	-	-	-	-	-	-	-	-	-	-	-	-	-	1194	ko00040//Pentose and glucuronate interconversions;ko00500//Starch and sucrose metabolism;ko01100//Metabolic pathways	-	GO:0004857//enzyme inhibitor activity;GO:0052689//carboxylic ester hydrolase activity	GO:0003006//developmental process involved in reproduction;GO:0044092//negative regulation of molecular function	gi|356505586|ref|XP_003521571.1|/8.44156e-131/PREDICTED: 21 kDa protein-like [Glycine max]
Glyma.04G103600	-	-	-	-	-	-	-	-	-	-	-	-	-1.79784	down	6.89257e-06	0.000781807	-	-	-	-	1864	ko00500//Starch and sucrose metabolism	-	GO:0019203//carbohydrate phosphatase activity	GO:0006796//phosphate-containing compound metabolic process;GO:0005991//trehalose metabolic process	gi|571450061|ref|XP_003523824.2|/0/PREDICTED: probable trehalose-phosphate phosphatase J [Glycine max]
Glyma.05G216400	-	-	-	-	-	-	-	-	-	-	-	-	1.09973	up	0.000424965	0.0215514	-	-	-	-	2663	ko00500//Starch and sucrose metabolism;ko01100//Metabolic pathways	-	GO:0005488;GO:0004553//hydrolase activity, hydrolyzing O-glycosyl compounds	GO:0044238//primary metabolic process	gi|734310523|gb|KHM99903.1|/0/Endoglucanase 6 [Glycine soja]
Glyma.05G236400	-	-	-	-	-	-	-	-	1.20227	up	0.000265578	0.0136797	2.30482	up	2.33243e-09	5.68156e-07	-	-	-	-	2164	ko00500//Starch and sucrose metabolism;ko01100//Metabolic pathways	GO:0009536//plastid	GO:0016798//hydrolase activity, acting on glycosyl bonds	GO:0009825//multidimensional cell growth;GO:0044238//primary metabolic process	gi|356513078|ref|XP_003525241.1|/0/PREDICTED: endoglucanase 8-like [Glycine max]
Glyma.06G301500	-1.40477	down	8.58437e-06	0.000265117	-	-	-	-	-	-	-	-	-	-	-	-	-	-	-	-	1891	ko00500//Starch and sucrose metabolism;ko01100//Metabolic pathways	-	GO:0016160//amylase activity	GO:0005976//polysaccharide metabolic process	gi|902938|dbj|BAA09462.1|/0/beta-amylase [Glycine max]
Glyma.06G318500	-1.24223	down	0.000110556	0.00215771	-	-	-	-	-	-	-	-	-	-	-	-	-	-	-	-	2399	ko00500//Starch and sucrose metabolism;ko01100//Metabolic pathways;ko00052//Galactose metabolism	-	GO:0004558//alpha-1,4-glucosidase activity	GO:0044238//primary metabolic process	gi|356515372|ref|XP_003526374.1|/0/PREDICTED: beta-fructofuranosidase, soluble isoenzyme I-like [Glycine max]
Glyma.07G046000	-1.56278	down	1.03251e-09	8.29084e-08	-	-	-	-	-	-	-	-	-	-	-	-	-	-	-	-	3558	ko00040//Pentose and glucuronate interconversions;ko00500//Starch and sucrose metabolism;ko01100//Metabolic pathways	GO:0005618//cell wall;GO:0043231//intracellular membrane-bounded organelle;GO:0044444;GO:0005576//extracellular region;GO:0016020//membrane	GO:0030234//enzyme regulator activity;GO:0052689//carboxylic ester hydrolase activity	GO:0044092//negative regulation of molecular function;GO:0071555//cell wall organization;GO:0000272//polysaccharide catabolic process	gi|947099228|gb|KRH47720.1|/0/hypothetical protein GLYMA_07G046000 [Glycine max]
Glyma.08G074700	-	-	-	-	-	-	-	-	1.33249	up	4.11597e-06	0.000360236	-	-	-	-	-	-	-	-	3060	ko00500//Starch and sucrose metabolism;ko01100//Metabolic pathways;ko00520//Amino sugar and nucleotide sugar metabolism	GO:0031012//extracellular matrix	GO:0004553//hydrolase activity, hydrolyzing O-glycosyl compounds	GO:0000272//polysaccharide catabolic process	gi|947093612|gb|KRH42197.1|;gi|356524862|ref|XP_003531047.1|/0;0/hypothetical protein GLYMA_08G074700 [Glycine max];PREDICTED: beta-xylosidase/alpha-L-arabinofuranosidase 2 [Glycine max]
Glyma.08G120800	-2.11118	down	1.91528e-05	0.000515506	-	-	-	-	-	-	-	-	-	-	-	-	-	-	-	-	3054	ko00500//Starch and sucrose metabolism	-	GO:0019203//carbohydrate phosphatase activity;GO:0035251//UDP-glucosyltransferase activity	GO:0006796//phosphate-containing compound metabolic process;GO:0005991//trehalose metabolic process	gi|955335317|ref|XP_014634392.1|/0/PREDICTED: alpha,alpha-trehalose-phosphate synthase [UDP-forming] 1-like [Glycine max]
Glyma.09G122000	-	-	-	-	-	-	-	-	-	-	-	-	1.25288	up	0.00104459	0.0413164	-	-	-	-	838	ko00040//Pentose and glucuronate interconversions;ko00500//Starch and sucrose metabolism;ko01100//Metabolic pathways	-	-	-	gi|356530768|ref|XP_003533952.1|/4.81613e-96/PREDICTED: 21 kDa protein-like [Glycine max]
Glyma.09G208200	-1.9498	down	0.000264885	0.00438979	-2.30987	down	0.00061161	0.0392962	-	-	-	-	-	-	-	-	-	-	-	-	4334	ko00500//Starch and sucrose metabolism;ko01100//Metabolic pathways;ko00520//Amino sugar and nucleotide sugar metabolism	GO:0031224//intrinsic component of membrane	GO:0016759//cellulose synthase activity	GO:0030243//cellulose metabolic process;GO:0009856//pollination	gi|734417458|gb|KHN38958.1|/0/Cellulose synthase-like protein D3 [Glycine soja]
Glyma.10G074800	2.30522	up	0.000155581	0.00283928	-	-	-	-	-	-	-	-	-	-	-	-	-	-	-	-	1959	ko00500//Starch and sucrose metabolism;ko01100//Metabolic pathways;ko00052//Galactose metabolism	-	GO:0016798//hydrolase activity, acting on glycosyl bonds	GO:0005985//sucrose metabolic process;GO:0046903//secretion;GO:0006073//cellular glucan metabolic process	gi|356534392|ref|XP_003535739.1|/0/PREDICTED: beta-fructofuranosidase, insoluble isoenzyme 1-like isoform X1 [Glycine max]
Glyma.10G230900	-	-	-	-	-	-	-	-	-	-	-	-	3.42196	up	0.000299443	0.0166023	-	-	-	-	1577	ko00040//Pentose and glucuronate interconversions;ko00500//Starch and sucrose metabolism;ko01100//Metabolic pathways	-	GO:0004553//hydrolase activity, hydrolyzing O-glycosyl compounds	GO:0044238//primary metabolic process	gi|356534103|ref|XP_003535597.1|/0/PREDICTED: probable polygalacturonase [Glycine max]
Glyma.11G039400	-	-	-	-	-	-	-	-	-2.84337	down	2.02282e-05	0.00145724	-	-	-	-	-	-	-	-	2028	ko00500//Starch and sucrose metabolism;ko01100//Metabolic pathways	GO:0009532//plastid stroma	GO:0016160//amylase activity	GO:0006950//response to stress;GO:0005976//polysaccharide metabolic process;GO:0000023//maltose metabolic process	gi|734408776|gb|KHN34883.1|/0/Beta-amylase 3, chloroplastic [Glycine soja]
Glyma.11G101300	-1.2561	down	0.00348451	0.0317009	-	-	-	-	-	-	-	-	-	-	-	-	-	-	-	-	2321	ko00500//Starch and sucrose metabolism;ko01100//Metabolic pathways	-	GO:0016798//hydrolase activity, acting on glycosyl bonds;GO:0005488;GO:0004553//hydrolase activity, hydrolyzing O-glycosyl compounds	GO:0044238//primary metabolic process	gi|571487997|ref|XP_006590804.1|;gi|947080369|gb|KRH29158.1|;gi|947080368|gb|KRH29157.1|/0;0;0/PREDICTED: endoglucanase 5-like [Glycine max];hypothetical protein GLYMA_11G101300 [Glycine max];hypothetical protein GLYMA_11G101300 [Glycine max]
Glyma.12G004700	-	-	-	-	-4.0972	down	3.18631e-07	4.15222e-05	-	-	-	-	-	-	-	-	-	-	-	-	1295	ko00500//Starch and sucrose metabolism;ko01100//Metabolic pathways	-	GO:0016798//hydrolase activity, acting on glycosyl bonds	GO:0044238//primary metabolic process	gi|947074959|gb|KRH23799.1|/0/hypothetical protein GLYMA_12G004700 [Glycine max]
Glyma.14G006100	-1.02488	down	0.00479338	0.0398759	-	-	-	-	-	-	-	-	-	-	-	-	-	-	-	-	2078	ko00040//Pentose and glucuronate interconversions;ko00500//Starch and sucrose metabolism;ko01100//Metabolic pathways	-	GO:0004553//hydrolase activity, hydrolyzing O-glycosyl compounds	GO:0044238//primary metabolic process	gi|955362405|ref|XP_014622079.1|;gi|947064948|gb|KRH14091.1|;gi|356551512|ref|XP_003544118.1|;gi|947064949|gb|KRH14092.1|/0;0;0;0/PREDICTED: polygalacturonase-like isoform X2 [Glycine max];hypothetical protein GLYMA_14G006100 [Glycine max];PREDICTED: polygalacturonase-like isoform X1 [Glycine max];hypothetical protein GLYMA_14G006100 [Glycine max]
Glyma.14G027400	-1.19199	down	0.0012063	0.0144052	-	-	-	-	-	-	-	-	-	-	-	-	-	-	-	-	2094	ko00500//Starch and sucrose metabolism;ko01110//Biosynthesis of secondary metabolites;ko00520//Amino sugar and nucleotide sugar metabolism	-	GO:0016740//transferase activity	-	gi|356553593|ref|XP_003545139.1|/0/PREDICTED: probable galacturonosyltransferase 15 [Glycine max]
Glyma.14G029100	-1.21224	down	3.63684e-07	1.66647e-05	-	-	-	-	-1.35263	down	4.48013e-05	0.00294926	-	-	-	-	-	-	-	-	3743	ko00500//Starch and sucrose metabolism;ko01100//Metabolic pathways	-	GO:0035251//UDP-glucosyltransferase activity	GO:0005984//disaccharide metabolic process	gi|356553609|ref|XP_003545147.1|/0/PREDICTED: probable sucrose-phosphate synthase 3 [Glycine max]
Glyma.15G146800	1.08002	up	3.06329e-05	0.000759629	-	-	-	-	-	-	-	-	-	-	-	-	-	-	-	-	2096	ko00040//Pentose and glucuronate interconversions;ko00500//Starch and sucrose metabolism;ko01100//Metabolic pathways	GO:0005618//cell wall;GO:0043231//intracellular membrane-bounded organelle	GO:0004553//hydrolase activity, hydrolyzing O-glycosyl compounds	GO:0044238//primary metabolic process	gi|571518634|ref|XP_006597719.1|/0/PREDICTED: probable polygalacturonase isoform X1 [Glycine max]
Glyma.15G184300	-1.56449	down	4.02078e-07	1.8275e-05	-	-	-	-	-	-	-	-	-	-	-	-	-	-	-	-	1956	ko00040//Pentose and glucuronate interconversions;ko00500//Starch and sucrose metabolism;ko01100//Metabolic pathways	-	GO:0016788//hydrolase activity, acting on ester bonds	GO:0008152//metabolic process	gi|356558481|ref|XP_003547535.1|/0/PREDICTED: pectinesterase/pectinesterase inhibitor PPE8B-like [Glycine max]
Glyma.15G223500	-1.53351	down	2.50363e-05	0.000640142	-	-	-	-	-	-	-	-	-	-	-	-	-	-	-	-	2432	ko00040//Pentose and glucuronate interconversions;ko00500//Starch and sucrose metabolism;ko01100//Metabolic pathways	GO:0030312//external encapsulating structure	GO:0030234//enzyme regulator activity;GO:0052689//carboxylic ester hydrolase activity	GO:0071555//cell wall organization;GO:0000272//polysaccharide catabolic process;GO:0044092//negative regulation of molecular function	gi|571520749|ref|XP_006598050.1|/0/PREDICTED: probable pectinesterase/pectinesterase inhibitor 47 [Glycine max]
Glyma.16G039300	-	-	-	-	-	-	-	-	-	-	-	-	1.58576	up	0.00106871	0.0420662	-	-	-	-	1845	ko00500//Starch and sucrose metabolism;ko01100//Metabolic pathways;ko01110//Biosynthesis of secondary metabolites;ko00460//Cyanoamino acid metabolism;ko00940//Phenylpropanoid biosynthesis	-	GO:0016798//hydrolase activity, acting on glycosyl bonds	GO:0044238//primary metabolic process	gi|947057276|gb|KRH06682.1|/0/hypothetical protein GLYMA_16G039300 [Glycine max]
Glyma.16G118000	-6.91545	down	1.84986e-28	1.52162e-25	-6.28015	down	2.06028e-18	7.39825e-16	-5.52213	down	2.61534e-12	6.39084e-10	-4.89401	down	1.00602e-08	2.26311e-06	-	-	-	-	412	ko00040//Pentose and glucuronate interconversions;ko00500//Starch and sucrose metabolism;ko01100//Metabolic pathways	-	GO:0004553//hydrolase activity, hydrolyzing O-glycosyl compounds	GO:0044238//primary metabolic process	gi|947058503|gb|KRH07909.1|/1.98927e-57/hypothetical protein GLYMA_16G118000 [Glycine max]
Glyma.17G138500	-	-	-	-	-	-	-	-	-	-	-	-	2.64156	up	0.000240576	0.0140966	-	-	-	-	2505	ko00500//Starch and sucrose metabolism;ko01100//Metabolic pathways;ko00052//Galactose metabolism	GO:0005618//cell wall;GO:0043231//intracellular membrane-bounded organelle	GO:0004558//alpha-1,4-glucosidase activity	GO:0005984//disaccharide metabolic process;GO:0051707//response to other organism;GO:0048364//root development;GO:0009739//response to gibberellin	gi|947054630|gb|KRH04083.1|;gi|356563300|ref|XP_003549902.1|/0;0/hypothetical protein GLYMA_17G138500 [Glycine max];PREDICTED: acid beta-fructofuranosidase [Glycine max]
Glyma.17G188200	-	-	-	-	-	-	-	-	-2.35442	down	0.000178807	0.00971823	-	-	-	-	-	-	-	-	2133	ko00500//Starch and sucrose metabolism;ko01100//Metabolic pathways;ko01110//Biosynthesis of secondary metabolites;ko00460//Cyanoamino acid metabolism;ko00940//Phenylpropanoid biosynthesis	-	GO:0016798//hydrolase activity, acting on glycosyl bonds	GO:0044238//primary metabolic process	gi|356565758|ref|XP_003551104.1|/0/PREDICTED: beta-glucosidase BoGH3B-like [Glycine max]
Glyma.18G065400	-	-	-	-	-	-	-	-	3.06312	up	2.84374e-08	3.51668e-06	3.02159	up	1.77461e-06	0.000237557	-	-	-	-	1968	ko00500//Starch and sucrose metabolism;ko01100//Metabolic pathways;ko01110//Biosynthesis of secondary metabolites;ko00460//Cyanoamino acid metabolism;ko00940//Phenylpropanoid biosynthesis	GO:0044444	GO:0016787//hydrolase activity	-	gi|947048791|gb|KRG98319.1|/0/hypothetical protein GLYMA_18G065400 [Glycine max]
Glyma.19G002500	-4.09224	down	2.06913e-10	1.933e-08	-	-	-	-	-	-	-	-	-	-	-	-	-	-	-	-	294	ko00500//Starch and sucrose metabolism;ko01100//Metabolic pathways	-	-	-	gi|947043560|gb|KRG93189.1|/4.91238e-68/hypothetical protein GLYMA_19G002500 [Glycine max]
Glyma.19G016100	-	-	-	-	-	-	-	-	-3.92769	down	0.000264338	0.0136389	-	-	-	-	-	-	-	-	1822	ko00500//Starch and sucrose metabolism;ko01110//Biosynthesis of secondary metabolites;ko00520//Amino sugar and nucleotide sugar metabolism	-	GO:0016740//transferase activity	GO:0006950//response to stress	gi|356572000|ref|XP_003554158.1|/0/PREDICTED: probable galacturonosyltransferase-like 10 [Glycine max]
Glyma.19G078400	-	-	-	-	-	-	-	-	-	-	-	-	-5.10149	down	2.31313e-07	3.92808e-05	-	-	-	-	1712	ko00040//Pentose and glucuronate interconversions;ko00500//Starch and sucrose metabolism;ko01100//Metabolic pathways	GO:0030312//external encapsulating structure	GO:0030234//enzyme regulator activity;GO:0052689//carboxylic ester hydrolase activity	GO:0071555//cell wall organization;GO:0000272//polysaccharide catabolic process;GO:0044092//negative regulation of molecular function	gi|955387229|ref|XP_003553884.2|/0/PREDICTED: probable pectinesterase/pectinesterase inhibitor 36 isoform X1 [Glycine max]
Glyma.19G223100	1.54648	up	0.00117489	0.014136	-	-	-	-	-	-	-	-	-	-	-	-	-	-	-	-	2289	ko00500//Starch and sucrose metabolism;ko01100//Metabolic pathways;ko00520//Amino sugar and nucleotide sugar metabolism	GO:0009536//plastid	GO:0070566//adenylyltransferase activity	GO:0005982//starch metabolic process;GO:0005977//glycogen metabolic process	gi|571559815|ref|XP_003553688.2|/0/PREDICTED: glucose-1-phosphate adenylyltransferase large subunit 1-like [Glycine max]
Glyma.19G231300	-1.09558	down	0.00487474	0.0403402	-	-	-	-	-	-	-	-	-	-	-	-	-	-	-	-	2028	ko00040//Pentose and glucuronate interconversions;ko00500//Starch and sucrose metabolism;ko01100//Metabolic pathways	GO:0030312//external encapsulating structure	GO:0030234//enzyme regulator activity;GO:0052689//carboxylic ester hydrolase activity	GO:0071555//cell wall organization;GO:0000272//polysaccharide catabolic process;GO:0044092//negative regulation of molecular function	gi|356572956|ref|XP_003554631.1|/0/PREDICTED: putative pectinesterase/pectinesterase inhibitor 22 [Glycine max]
Glyma.20G029100	-1.78666	down	1.99576e-05	0.000533336	-	-	-	-	-	-	-	-	-	-	-	-	-	-	-	-	2119	ko00500//Starch and sucrose metabolism;ko01100//Metabolic pathways;ko00052//Galactose metabolism	-	GO:0016798//hydrolase activity, acting on glycosyl bonds	GO:0005985//sucrose metabolic process;GO:0046903//secretion;GO:0006073//cellular glucan metabolic process	gi|571563934|ref|XP_006605559.1|;gi|356577241|ref|XP_003556736.1|/0;0/PREDICTED: beta-fructofuranosidase, insoluble isoenzyme 1-like isoform X2 [Glycine max];PREDICTED: beta-fructofuranosidase, insoluble isoenzyme 1-like isoform X1 [Glycine max]
Glyma.12G130200	-	-	-	-	-	-	-	-	-	-	-	-	-	-	-	-	8.47386	up	2.32e-05	0.000652552	1900	ko00500//Starch and sucrose metabolism;ko01100//Metabolic pathways;ko01110//Biosynthesis of secondary metabolites;ko00460//Cyanoamino acid metabolism;ko00940//Phenylpropanoid biosynthesis	-	GO:0016798//hydrolase activity, acting on glycosyl bonds	GO:0044238//primary metabolic process	gi|955354334|ref|XP_003540006.2|/0/PREDICTED: cyanogenic beta-glucosidase-like [Glycine max]
Glyma.12G053800	-	-	-	-	-	-	-	-	-	-	-	-	-	-	-	-	8.43265	up	2.4394e-05	0.000676792	2190	ko00500//Starch and sucrose metabolism;ko01100//Metabolic pathways;ko01110//Biosynthesis of secondary metabolites;ko00460//Cyanoamino acid metabolism;ko00940//Phenylpropanoid biosynthesis	GO:0043231//intracellular membrane-bounded organelle	GO:0004553//hydrolase activity, hydrolyzing O-glycosyl compounds;GO:0016798//hydrolase activity, acting on glycosyl bonds	GO:0044238//primary metabolic process	gi|947075816|gb|KRH24656.1|;gi|734387515|gb|KHN25278.1|/0;0/hypothetical protein GLYMA_12G053800 [Glycine max];Non-cyanogenic beta-glucosidase [Glycine soja]
Glyma.11G129500	-	-	-	-	-	-	-	-	-	-	-	-	-	-	-	-	8.2002	up	3.80908e-05	0.000939781	1893	ko00500//Starch and sucrose metabolism;ko01100//Metabolic pathways;ko01110//Biosynthesis of secondary metabolites;ko00460//Cyanoamino acid metabolism;ko00940//Phenylpropanoid biosynthesis	-	GO:0016798//hydrolase activity, acting on glycosyl bonds	GO:0044238//primary metabolic process	gi|734406299|gb|KHN33931.1|/0/Beta-glucosidase 24 [Glycine soja]
Glyma.12G054000	-	-	-	-	-	-	-	-	-	-	-	-	-	-	-	-	7.98202	up	5.82306e-05	0.00126245	2046	ko00500//Starch and sucrose metabolism;ko01100//Metabolic pathways;ko01110//Biosynthesis of secondary metabolites;ko00460//Cyanoamino acid metabolism;ko00940//Phenylpropanoid biosynthesis	-	GO:0016798//hydrolase activity, acting on glycosyl bonds	GO:0044238//primary metabolic process	gi|734387513|gb|KHN25276.1|/0/Beta-glucosidase 24 [Glycine soja]
Glyma.01G240300	-	-	-	-	-	-	-	-	-	-	-	-	-	-	-	-	7.95868	up	6.54826e-08	7.51334e-06	1921	ko00040//Pentose and glucuronate interconversions;ko00500//Starch and sucrose metabolism;ko01100//Metabolic pathways	GO:0030312//external encapsulating structure;GO:0044437	GO:0030234//enzyme regulator activity;GO:0052689//carboxylic ester hydrolase activity	GO:0071555//cell wall organization;GO:0000272//polysaccharide catabolic process;GO:0044092//negative regulation of molecular function	gi|571436840|ref|XP_006573891.1|/0/PREDICTED: pectinesterase-like [Glycine max]
Glyma.11G129700	-	-	-	-	-	-	-	-	-	-	-	-	-	-	-	-	7.37099	up	0.000124351	0.00218725	1852	ko00500//Starch and sucrose metabolism;ko01100//Metabolic pathways;ko01110//Biosynthesis of secondary metabolites;ko00460//Cyanoamino acid metabolism;ko00940//Phenylpropanoid biosynthesis	-	GO:0016798//hydrolase activity, acting on glycosyl bonds	GO:0044238//primary metabolic process	gi|734406297|gb|KHN33929.1|/0/Beta-glucosidase 24 [Glycine soja]
Glyma.01G137700	-	-	-	-	-	-	-	-	-	-	-	-	-	-	-	-	7.21513	up	0.000155841	0.00257809	1973	ko00040//Pentose and glucuronate interconversions;ko00500//Starch and sucrose metabolism;ko01100//Metabolic pathways	GO:0030312//external encapsulating structure	GO:0030234//enzyme regulator activity;GO:0052689//carboxylic ester hydrolase activity	GO:0071555//cell wall organization;GO:0000272//polysaccharide catabolic process;GO:0044092//negative regulation of molecular function	gi|356496344|ref|XP_003517028.1|/0/PREDICTED: pectinesterase 2-like [Glycine max]
Glyma.12G054100	-	-	-	-	-	-	-	-	-	-	-	-	-	-	-	-	7.17114	up	0.000170215	0.0027529	1943	ko00500//Starch and sucrose metabolism;ko01100//Metabolic pathways;ko01110//Biosynthesis of secondary metabolites;ko00460//Cyanoamino acid metabolism;ko00940//Phenylpropanoid biosynthesis	-	GO:0016798//hydrolase activity, acting on glycosyl bonds	GO:0044238//primary metabolic process	gi|356544535|ref|XP_003540705.1|/0/PREDICTED: cyanogenic beta-glucosidase-like [Glycine max]
Glyma.03G029400	-	-	-	-	-	-	-	-	-	-	-	-	-	-	-	-	7.14773	up	0.000177249	0.00283847	1185	ko00040//Pentose and glucuronate interconversions;ko00500//Starch and sucrose metabolism;ko01100//Metabolic pathways	GO:0030312//external encapsulating structure	GO:0030234//enzyme regulator activity;GO:0052689//carboxylic ester hydrolase activity	GO:0071555//cell wall organization;GO:0000272//polysaccharide catabolic process;GO:0044092//negative regulation of molecular function	gi|571444145|ref|XP_006576427.1|/0/PREDICTED: pectinesterase 2-like [Glycine max]
Glyma.19G212600	-1.54054	down	1.4851e-08	9.39525e-07	-1.46554	down	1.03524e-06	0.000126252	-	-	-	-	-	-	-	-	5.65883	up	0.000375704	0.00477174	2056	ko00040//Pentose and glucuronate interconversions;ko00500//Starch and sucrose metabolism;ko01100//Metabolic pathways	GO:0030312//external encapsulating structure	GO:0030234//enzyme regulator activity;GO:0052689//carboxylic ester hydrolase activity	GO:0071555//cell wall organization;GO:0000272//polysaccharide catabolic process;GO:0044092//negative regulation of molecular function	gi|571559513|ref|XP_003553658.2|/0/PREDICTED: pectinesterase-like [Glycine max]
Glyma.17G227900	2.13904	up	0.00323203	0.0300133	-	-	-	-	-	-	-	-	-	-	-	-	5.2227	up	0.000220836	0.00329877	2333	ko00500//Starch and sucrose metabolism;ko01100//Metabolic pathways;ko00052//Galactose metabolism	-	GO:0016798//hydrolase activity, acting on glycosyl bonds	GO:0044238//primary metabolic process	gi|947055989|gb|KRH05442.1|;gi|571538935|ref|XP_003549347.2|/0;0/hypothetical protein GLYMA_17G227900 [Glycine max];PREDICTED: fructan 6-exohydrolase-like [Glycine max]
Glyma.20G026700	-	-	-	-	-	-	-	-	-	-	-	-	-	-	-	-	5.10843	up	9.60038e-06	0.000337623	3557	ko00500//Starch and sucrose metabolism	-	GO:0043168//anion binding;GO:0004645//phosphorylase activity	GO:0044238//primary metabolic process;GO:0006950//response to stress;GO:0009628//response to abiotic stimulus	gi|571563869|ref|XP_006605545.1|;gi|356577161|ref|XP_003556696.1|/0;0/PREDICTED: alpha-1,4 glucan phosphorylase L-2 isozyme, chloroplastic/amyloplastic-like isoform X2 [Glycine max];PREDICTED: alpha-1,4 glucan phosphorylase L-2 isozyme, chloroplastic/amyloplastic-like isoform X1 [Glycine max]
Glyma.17G067800	-	-	-	-	-	-	-	-	-	-	-	-	-	-	-	-	4.33757	up	5.92352e-05	0.00127892	3485	ko00500//Starch and sucrose metabolism	GO:0043231//intracellular membrane-bounded organelle;GO:0044444	-	GO:0005991//trehalose metabolic process	gi|955380139|ref|XP_014625413.1|;gi|947053485|gb|KRH02938.1|/0;0/PREDICTED: probable alpha,alpha-trehalose-phosphate synthase [UDP-forming] 11 [Glycine max];hypothetical protein GLYMA_17G067800 [Glycine max]
Glyma.16G014100	-1.85941	down	4.36721e-13	6.28052e-11	-	-	-	-	-	-	-	-	-	-	-	-	4.29622	up	1.00698e-06	5.97093e-05	1890	ko00040//Pentose and glucuronate interconversions;ko00500//Starch and sucrose metabolism;ko01100//Metabolic pathways	GO:0005618//cell wall;GO:0005576//extracellular region;GO:0016020//membrane;GO:0044424	GO:0030234//enzyme regulator activity;GO:0052689//carboxylic ester hydrolase activity	GO:0071555//cell wall organization;GO:0051707//response to other organism;GO:0000272//polysaccharide catabolic process;GO:0044092//negative regulation of molecular function	gi|955374748|ref|XP_006599763.2|/0/PREDICTED: pectinesterase-like [Glycine max]
Glyma.13G088300	-	-	-	-	-	-	-	-	-3.26614	down	0.000304926	0.0152688	-	-	-	-	3.84987	up	0.000133822	0.00229799	1763	ko00500//Starch and sucrose metabolism	-	GO:0019203//carbohydrate phosphatase activity	GO:0006796//phosphate-containing compound metabolic process;GO:0005991//trehalose metabolic process	gi|734371039|gb|KHN19585.1|/0/Trehalose-phosphate phosphatase [Glycine soja]
Glyma.18G002200	-	-	-	-	-	-	-	-	-	-	-	-	-	-	-	-	3.65548	up	1.44094e-05	0.00045816	1320	ko00500//Starch and sucrose metabolism;ko01100//Metabolic pathways;ko00520//Amino sugar and nucleotide sugar metabolism	GO:0043231//intracellular membrane-bounded organelle	GO:0016854//racemase and epimerase activity;GO:0048037//cofactor binding	GO:0044238//primary metabolic process	gi|947047820|gb|KRG97348.1|/0/hypothetical protein GLYMA_18G002200 [Glycine max]
Glyma.01G203400	-	-	-	-	-	-	-	-	-	-	-	-	-	-	-	-	3.47236	up	0.000561415	0.00636167	2041	ko00500//Starch and sucrose metabolism;ko01100//Metabolic pathways	GO:0009532//plastid stroma	GO:0016160//amylase activity	GO:0006950//response to stress;GO:0005976//polysaccharide metabolic process;GO:0000023//maltose metabolic process	gi|571436239|ref|XP_006573703.1|/0/PREDICTED: beta-amylase 3, chloroplastic [Glycine max]
Glyma.11G116600	-	-	-	-	-	-	-	-	-	-	-	-	-	-	-	-	3.39944	up	5.87744e-05	0.00126993	2407	ko00500//Starch and sucrose metabolism;ko01100//Metabolic pathways;ko00520//Amino sugar and nucleotide sugar metabolism	GO:0009536//plastid	GO:0070566//adenylyltransferase activity	GO:0005982//starch metabolic process;GO:0005977//glycogen metabolic process	gi|734418875|gb|KHN39792.1|/0/Glucose-1-phosphate adenylyltransferase large subunit 1 [Glycine soja]
Glyma.08G109100	-	-	-	-	-	-	-	-	-	-	-	-	2.08716	up	6.96049e-08	1.37901e-05	3.27683	up	3.48629e-09	6.30686e-07	2343	ko00500//Starch and sucrose metabolism;ko01100//Metabolic pathways;ko00520//Amino sugar and nucleotide sugar metabolism	GO:0043231//intracellular membrane-bounded organelle	GO:0016854//racemase and epimerase activity;GO:0048037//cofactor binding	GO:0044238//primary metabolic process	gi|571470896|ref|XP_003532740.2|/0/PREDICTED: UDP-glucuronate 4-epimerase 6-like [Glycine max]
Glyma.06G318400	-	-	-	-	-	-	-	-	-	-	-	-	-	-	-	-	3.21001	up	4.1515e-05	0.000988354	2252	ko00500//Starch and sucrose metabolism	-	GO:0019203//carbohydrate phosphatase activity	GO:0006796//phosphate-containing compound metabolic process;GO:0005991//trehalose metabolic process	gi|571462885|ref|XP_006582414.1|;gi|947107964|gb|KRH56347.1|/0;0/PREDICTED: trehalose-phosphate phosphatase A-like [Glycine max];hypothetical protein GLYMA_06G318400 [Glycine max]
Glyma.13G067900	-	-	-	-	-	-	-	-	-3.59062	down	2.72077e-05	0.00191048	-	-	-	-	3.05666	up	0.000280872	0.00392202	1651	ko00500//Starch and sucrose metabolism;ko01110//Biosynthesis of secondary metabolites;ko00520//Amino sugar and nucleotide sugar metabolism	-	GO:0016740//transferase activity	GO:0006950//response to stress	gi|356550372|ref|XP_003543561.1|/0/PREDICTED: probable galacturonosyltransferase-like 10 [Glycine max]
Glyma.08G150400	-	-	-	-	-	-	-	-	-	-	-	-	-	-	-	-	3.02677	up	0.000621151	0.00685067	1332	ko00500//Starch and sucrose metabolism;ko01100//Metabolic pathways;ko01110//Biosynthesis of secondary metabolites;ko00460//Cyanoamino acid metabolism;ko00940//Phenylpropanoid biosynthesis	-	GO:0004553//hydrolase activity, hydrolyzing O-glycosyl compounds	GO:0005975//carbohydrate metabolic process	gi|955335734|ref|XP_014634459.1|/0/PREDICTED: vicianin hydrolase [Glycine max]
Glyma.06G104800	-1.13507	down	0.00391958	0.0344688	-	-	-	-	-	-	-	-	-	-	-	-	2.91827	up	0.000593307	0.00662038	2151	ko00500//Starch and sucrose metabolism	-	GO:0019203//carbohydrate phosphatase activity	GO:0006796//phosphate-containing compound metabolic process;GO:0005991//trehalose metabolic process	gi|947104706|gb|KRH53089.1|;gi|947104707|gb|KRH53090.1|;gi|356518491|ref|XP_003527912.1|;gi|571459884|ref|XP_006581545.1|/0;0;0;0/hypothetical protein GLYMA_06G104800 [Glycine max];hypothetical protein GLYMA_06G104800 [Glycine max];PREDICTED: probable trehalose-phosphate phosphatase J isoform X2 [Glycine max];PREDICTED: probable trehalose-phosphate phosphatase J isoform X1 [Glycine max]
Glyma.04G011900	-	-	-	-	-	-	-	-	-	-	-	-	-	-	-	-	2.88559	up	0.00210277	0.0160185	2197	ko00500//Starch and sucrose metabolism;ko01100//Metabolic pathways;ko00520//Amino sugar and nucleotide sugar metabolism	GO:0009536//plastid	GO:0070566//adenylyltransferase activity	GO:0005982//starch metabolic process;GO:0005977//glycogen metabolic process	gi|947112523|gb|KRH60825.1|;gi|734405977|gb|KHN33746.1|/0;0/hypothetical protein GLYMA_04G011900 [Glycine max];Glucose-1-phosphate adenylyltransferase large subunit 1 [Glycine soja]
Glyma.09G073600	-	-	-	-	-	-	-	-	-	-	-	-	-	-	-	-	2.70881	up	9.42618e-06	0.00033314	3672	ko00500//Starch and sucrose metabolism;ko01100//Metabolic pathways	-	GO:0035251//UDP-glucosyltransferase activity	GO:0005984//disaccharide metabolic process;GO:0044403//symbiosis, encompassing mutualism through parasitism	gi|356530467|ref|XP_003533802.1|;gi|947088892|gb|KRH37557.1|;gi|947088893|gb|KRH37558.1|/0;0;0/PREDICTED: sucrose synthase [Glycine max];hypothetical protein GLYMA_09G073600 [Glycine max];hypothetical protein GLYMA_09G073600 [Glycine max]
Glyma.04G201600	-	-	-	-	3.13964	up	0.000377069	0.0260387	3.22301	up	0.000337032	0.016658	3.01498	up	1.71494e-06	0.000230609	2.61123	up	0.00120708	0.0108534	1184	ko00500//Starch and sucrose metabolism;ko01100//Metabolic pathways;ko01110//Biosynthesis of secondary metabolites;ko00460//Cyanoamino acid metabolism;ko00940//Phenylpropanoid biosynthesis	-	GO:0016798//hydrolase activity, acting on glycosyl bonds	GO:0044238//primary metabolic process	gi|947115574|gb|KRH63876.1|/3.01797e-58/hypothetical protein GLYMA_04G201600 [Glycine max]
Glyma.01G014000	-1.29441	down	0.00328876	0.0304039	-	-	-	-	-2.29162	down	0.00101556	0.0393657	-	-	-	-	2.59794	up	0.000109791	0.00200471	3967	ko00500//Starch and sucrose metabolism;ko01100//Metabolic pathways;ko00520//Amino sugar and nucleotide sugar metabolism	GO:0031224//intrinsic component of membrane	GO:0016759//cellulose synthase activity	GO:0030243//cellulose metabolic process;GO:0009856//pollination	gi|571433624|ref|XP_006572955.1|/0/PREDICTED: cellulose synthase-like protein D2 [Glycine max]
Glyma.09G038600	-	-	-	-	-	-	-	-	-	-	-	-	-	-	-	-	2.41606	up	0.00801828	0.0411312	3203	ko00500//Starch and sucrose metabolism;ko01100//Metabolic pathways;ko01110//Biosynthesis of secondary metabolites;ko00460//Cyanoamino acid metabolism;ko00940//Phenylpropanoid biosynthesis	GO:0005618//cell wall;GO:0005576//extracellular region	GO:0016798//hydrolase activity, acting on glycosyl bonds	GO:0003006//developmental process involved in reproduction;GO:0044238//primary metabolic process	gi|955340041|ref|XP_003533205.3|;gi|947088349|gb|KRH37014.1|/0;0/PREDICTED: beta-D-xylosidase 1-like [Glycine max];hypothetical protein GLYMA_09G038600 [Glycine max]
Glyma.09G168300	-	-	-	-	-	-	-	-	-	-	-	-	-	-	-	-	2.39835	up	3.74174e-05	0.000927985	2221	ko00500//Starch and sucrose metabolism;ko01100//Metabolic pathways	-	GO:0016160//amylase activity	GO:0005976//polysaccharide metabolic process	gi|356531040|ref|XP_003534086.1|/0/PREDICTED: beta-amylase 1, chloroplastic [Glycine max]
Glyma.14G170900	-	-	-	-	-	-	-	-	-	-	-	-	1.46113	up	5.28187e-05	0.00425384	2.3936	up	9.41233e-09	1.46693e-06	2739	ko00500//Starch and sucrose metabolism;ko01100//Metabolic pathways;ko01110//Biosynthesis of secondary metabolites;ko00460//Cyanoamino acid metabolism;ko00520//Amino sugar and nucleotide sugar metabolism;ko00940//Phenylpropanoid biosynthesis	GO:0005911//cell-cell junction;GO:0005576//extracellular region;GO:0005618//cell wall;GO:0009536//plastid	GO:0016798//hydrolase activity, acting on glycosyl bonds	GO:0044238//primary metabolic process	gi|356552866|ref|XP_003544783.1|;gi|947067550|gb|KRH16693.1|/0;0/PREDICTED: probable beta-D-xylosidase 7 [Glycine max];hypothetical protein GLYMA_14G170900 [Glycine max]
Glyma.17G247900	-	-	-	-	-	-	-	-	-	-	-	-	-	-	-	-	2.36796	up	0.000396992	0.00495302	2261	ko00500//Starch and sucrose metabolism;ko01110//Biosynthesis of secondary metabolites;ko00520//Amino sugar and nucleotide sugar metabolism	-	GO:0016740//transferase activity	-	gi|356562321|ref|XP_003549420.1|/0/PREDICTED: probable galacturonosyltransferase-like 1 [Glycine max]
Glyma.15G133700	-	-	-	-	-	-	-	-	-	-	-	-	-	-	-	-	2.33848	up	0.000266463	0.00375337	3365	ko00500//Starch and sucrose metabolism;ko01100//Metabolic pathways;ko00052//Galactose metabolism	-	GO:0016798//hydrolase activity, acting on glycosyl bonds;GO:0005488	GO:0044238//primary metabolic process	gi|947062578|gb|KRH11839.1|/0/hypothetical protein GLYMA_15G133700 [Glycine max]
Glyma.15G108000	-	-	-	-	-	-	-	-	-	-	-	-	-	-	-	-	2.3366	up	5.71494e-07	3.97551e-05	4085	ko00500//Starch and sucrose metabolism;ko01100//Metabolic pathways	-	GO:0030247//polysaccharide binding;GO:0046527//glucosyltransferase activity	GO:0006073//cellular glucan metabolic process;GO:0008152//metabolic process	gi|356555668|ref|XP_003546152.1|/0/PREDICTED: starch synthase 3, chloroplastic/amyloplastic-like isoform X3 [Glycine max]
Glyma.02G287600	-	-	-	-	-	-	-	-	-	-	-	-	-	-	-	-	2.28077	up	0.00344454	0.022778	2135	ko00500//Starch and sucrose metabolism;ko01110//Biosynthesis of secondary metabolites;ko00520//Amino sugar and nucleotide sugar metabolism	-	GO:0016740//transferase activity	-	gi|356499376|ref|XP_003518517.1|;gi|955309155|ref|XP_014626011.1|/0;0/PREDICTED: probable galacturonosyltransferase 15 isoform X1 [Glycine max];PREDICTED: probable galacturonosyltransferase 15 isoform X2 [Glycine max]
Glyma.05G056300	-	-	-	-	-	-	-	-	-	-	-	-	-	-	-	-	2.24595	up	5.03075e-05	0.00113246	2656	ko00500//Starch and sucrose metabolism;ko01100//Metabolic pathways;ko00052//Galactose metabolism	GO:0005618//cell wall;GO:0043231//intracellular membrane-bounded organelle	GO:0004558//alpha-1,4-glucosidase activity	GO:0005984//disaccharide metabolic process;GO:0051707//response to other organism;GO:0048364//root development;GO:0009739//response to gibberellin	gi|947109026|gb|KRH57352.1|;gi|947109027|gb|KRH57353.1|;gi|356514218|ref|XP_003525803.1|/0;0;0/hypothetical protein GLYMA_05G056300 [Glycine max];hypothetical protein GLYMA_05G056300 [Glycine max];PREDICTED: acid beta-fructofuranosidase [Glycine max]
Glyma.09G077100	-	-	-	-	-	-	-	-	-	-	-	-	-	-	-	-	2.24418	up	0.000385012	0.00484809	1790	ko00040//Pentose and glucuronate interconversions;ko00500//Starch and sucrose metabolism;ko01100//Metabolic pathways	GO:0030312//external encapsulating structure	GO:0030234//enzyme regulator activity;GO:0052689//carboxylic ester hydrolase activity	GO:0071555//cell wall organization;GO:0000272//polysaccharide catabolic process;GO:0044092//negative regulation of molecular function	gi|734344035|gb|KHN10379.1|/0/Pectinesterase/pectinesterase inhibitor PPE8B [Glycine soja]
Glyma.15G182600	-	-	-	-	-	-	-	-	-	-	-	-	-	-	-	-	2.23471	up	0.00184943	0.0146602	3002	ko00500//Starch and sucrose metabolism;ko01100//Metabolic pathways	-	GO:0035251//UDP-glucosyltransferase activity	GO:0005984//disaccharide metabolic process;GO:0044403//symbiosis, encompassing mutualism through parasitism	gi|947063355|gb|KRH12616.1|;gi|571519746|ref|XP_006597891.1|/0;0/hypothetical protein GLYMA_15G182600 [Glycine max];PREDICTED: sucrose synthase-like [Glycine max]
Glyma.04G119700	-	-	-	-	-	-	-	-	-	-	-	-	-	-	-	-	2.22626	up	0.00954401	0.0463348	1963	ko00500//Starch and sucrose metabolism	-	GO:0019203//carbohydrate phosphatase activity	GO:0006796//phosphate-containing compound metabolic process;GO:0005991//trehalose metabolic process	gi|571450244|ref|XP_006578369.1|/0/PREDICTED: trehalose-phosphate phosphatase A isoform X2 [Glycine max]
Glyma.06G314200	-1.20844	down	6.27552e-08	3.44133e-06	-	-	-	-	-	-	-	-	-	-	-	-	2.17888	up	0.00652482	0.0354871	2067	ko00040//Pentose and glucuronate interconversions;ko00500//Starch and sucrose metabolism;ko01100//Metabolic pathways	GO:0030312//external encapsulating structure	GO:0030234//enzyme regulator activity;GO:0052689//carboxylic ester hydrolase activity	GO:0071555//cell wall organization;GO:0000272//polysaccharide catabolic process;GO:0044092//negative regulation of molecular function	gi|955326411|ref|XP_003527536.3|/0/PREDICTED: probable pectinesterase/pectinesterase inhibitor 47 [Glycine max]
Glyma.12G042400	-	-	-	-	-	-	-	-	-	-	-	-	-	-	-	-	2.1595	up	0.0021912	0.0164994	2521	ko00500//Starch and sucrose metabolism;ko01100//Metabolic pathways;ko00520//Amino sugar and nucleotide sugar metabolism	GO:0009536//plastid	GO:0070566//adenylyltransferase activity	GO:0005982//starch metabolic process;GO:0005977//glycogen metabolic process	gi|734387621|gb|KHN25384.1|/0/Glucose-1-phosphate adenylyltransferase large subunit 1 [Glycine soja]
Glyma.06G128500	-	-	-	-	-	-	-	-	-	-	-	-	-	-	-	-	2.14733	up	2.51673e-05	0.000694195	2378	ko00040//Pentose and glucuronate interconversions;ko00500//Starch and sucrose metabolism;ko01100//Metabolic pathways	GO:0030312//external encapsulating structure	GO:0030234//enzyme regulator activity;GO:0052689//carboxylic ester hydrolase activity	GO:0071555//cell wall organization;GO:0000272//polysaccharide catabolic process;GO:0044092//negative regulation of molecular function	gi|356516053|ref|XP_003526711.1|/0/PREDICTED: probable pectinesterase/pectinesterase inhibitor 34 [Glycine max]
Glyma.06G034600	-	-	-	-	-	-	-	-	-	-	-	-	-	-	-	-	2.10368	up	0.00782789	0.0404089	1909	ko00500//Starch and sucrose metabolism;ko01110//Biosynthesis of secondary metabolites;ko00520//Amino sugar and nucleotide sugar metabolism	-	GO:0016740//transferase activity	GO:0003002//regionalization;GO:0042545//cell wall modification;GO:0006950//response to stress;GO:0048827//phyllome development;GO:0000003//reproduction;GO:0010413//glucuronoxylan metabolic process	gi|356519066|ref|XP_003528195.1|/0/PREDICTED: probable galacturonosyltransferase-like 1 [Glycine max]
Glyma.01G232500	-	-	-	-	-	-	-	-	-	-	-	-	-	-	-	-	2.09502	up	0.00380554	0.0244235	3949	ko00500//Starch and sucrose metabolism;ko01100//Metabolic pathways;ko00520//Amino sugar and nucleotide sugar metabolism	GO:0031224//intrinsic component of membrane	GO:0016759//cellulose synthase activity	GO:0030243//cellulose metabolic process	gi|356497399|ref|XP_003517548.1|/0/PREDICTED: cellulose synthase-like protein D2 [Glycine max]
Glyma.09G071500	-	-	-	-	-	-	-	-	-	-	-	-	-	-	-	-	2.09074	up	0.0021222	0.0161213	2110	ko00040//Pentose and glucuronate interconversions;ko00500//Starch and sucrose metabolism;ko01100//Metabolic pathways	-	GO:0004553//hydrolase activity, hydrolyzing O-glycosyl compounds	GO:0044238//primary metabolic process	gi|356530447|ref|XP_003533792.1|/0/PREDICTED: probable polygalacturonase [Glycine max]
Glyma.08G180900	-	-	-	-	-	-	-	-	-	-	-	-	-	-	-	-	2.08141	up	0.0010938	0.0100665	2807	ko00500//Starch and sucrose metabolism;ko01100//Metabolic pathways;ko00520//Amino sugar and nucleotide sugar metabolism	GO:0031012//extracellular matrix	GO:0004553//hydrolase activity, hydrolyzing O-glycosyl compounds	GO:0000272//polysaccharide catabolic process	gi|734390440|gb|KHN26728.1|;gi|356525896|ref|XP_003531557.1|/0;0/Beta-xylosidase/alpha-L-arabinofuranosidase 1 [Glycine soja];PREDICTED: beta-xylosidase/alpha-L-arabinofuranosidase 1 [Glycine max]
Glyma.09G028000	-	-	-	-	-	-	-	-	-	-	-	-	-	-	-	-	2.06765	up	0.00718054	0.0379748	3312	ko00500//Starch and sucrose metabolism;ko01100//Metabolic pathways;ko00052//Galactose metabolism	-	GO:0016798//hydrolase activity, acting on glycosyl bonds;GO:0005488	GO:0044238//primary metabolic process	gi|734428229|gb|KHN44656.1|/0/Alpha-glucosidase [Glycine soja]
Glyma.19G113600	-	-	-	-	-	-	-	-	-	-	-	-	-	-	-	-	2.05127	up	0.000294413	0.00406829	2481	ko00500//Starch and sucrose metabolism;ko01100//Metabolic pathways;ko01110//Biosynthesis of secondary metabolites;ko00460//Cyanoamino acid metabolism;ko00940//Phenylpropanoid biosynthesis	-	GO:0016798//hydrolase activity, acting on glycosyl bonds	GO:0044238//primary metabolic process	gi|947045227|gb|KRG94856.1|;gi|571556301|ref|XP_006604248.1|/0;0/hypothetical protein GLYMA_19G113600 [Glycine max];PREDICTED: beta-glucosidase BoGH3B-like [Glycine max]
Glyma.15G143700	-1.17561	down	4.92866e-06	0.000164086	-	-	-	-	-	-	-	-	-	-	-	-	2.03865	up	0.00114961	0.0104544	2644	ko00500//Starch and sucrose metabolism;ko01100//Metabolic pathways;ko01110//Biosynthesis of secondary metabolites;ko00460//Cyanoamino acid metabolism;ko00940//Phenylpropanoid biosynthesis	GO:0005618//cell wall;GO:0005576//extracellular region	GO:0016798//hydrolase activity, acting on glycosyl bonds	GO:0003006//developmental process involved in reproduction;GO:0044238//primary metabolic process	gi|947062724|gb|KRH11985.1|;gi|356556038|ref|XP_003546334.1|/0;0/hypothetical protein GLYMA_15G143700 [Glycine max];PREDICTED: beta-D-xylosidase 1 [Glycine max]
Glyma.15G098100	-	-	-	-	-	-	-	-	-	-	-	-	-	-	-	-	1.9716	up	0.00519256	0.0303333	2035	ko00500//Starch and sucrose metabolism;ko01100//Metabolic pathways	-	GO:0016160//amylase activity	GO:0005976//polysaccharide metabolic process	gi|351726594|ref|NP_001236364.1|/0/inactive beta-amylase-like [Glycine max]
Glyma.07G066900	-	-	-	-	-	-	-	-	-	-	-	-	-	-	-	-	1.93725	up	0.00184446	0.0146372	2125	ko00040//Pentose and glucuronate interconversions;ko00500//Starch and sucrose metabolism;ko01100//Metabolic pathways	-	GO:0004553//hydrolase activity, hydrolyzing O-glycosyl compounds	GO:0044238//primary metabolic process	gi|356520375|ref|XP_003528838.1|/0/PREDICTED: probable polygalacturonase [Glycine max]
Glyma.19G113500	-	-	-	-	-	-	-	-	-	-	-	-	-	-	-	-	1.87299	up	0.00565713	0.0322501	2193	ko00500//Starch and sucrose metabolism;ko01100//Metabolic pathways;ko01110//Biosynthesis of secondary metabolites;ko00460//Cyanoamino acid metabolism;ko00940//Phenylpropanoid biosynthesis	-	GO:0016798//hydrolase activity, acting on glycosyl bonds	GO:0044238//primary metabolic process	gi|571556289|ref|XP_006604246.1|/0/PREDICTED: beta-glucosidase BoGH3B-like [Glycine max]
Glyma.05G127800	-	-	-	-	-	-	-	-	-	-	-	-	-	-	-	-	1.83383	up	0.00599981	0.0335728	3636	ko00500//Starch and sucrose metabolism;ko01100//Metabolic pathways	-	GO:0046527//glucosyltransferase activity	GO:0006073//cellular glucan metabolic process	gi|356512165|ref|XP_003524791.1|/0/PREDICTED: probable starch synthase 4, chloroplastic/amyloplastic [Glycine max]
Glyma.08G296800	-	-	-	-	-	-	-	-	-	-	-	-	-	-	-	-	1.78994	up	1.56969e-06	8.51124e-05	3346	ko00500//Starch and sucrose metabolism;ko01100//Metabolic pathways	-	GO:0046872//metal ion binding;GO:0016160//amylase activity	GO:0044238//primary metabolic process	gi|356526892|ref|XP_003532050.1|/0/PREDICTED: alpha-amylase 3, chloroplastic isoform X1 [Glycine max]
Glyma.16G014000	-	-	-	-	-	-	-	-	-	-	-	-	-	-	-	-	1.75683	up	0.00242795	0.0177694	2123	ko00040//Pentose and glucuronate interconversions;ko00500//Starch and sucrose metabolism;ko01100//Metabolic pathways	GO:0005911//cell-cell junction;GO:0016020//membrane;GO:0030312//external encapsulating structure;GO:0044437	GO:0030234//enzyme regulator activity;GO:0052689//carboxylic ester hydrolase activity	GO:0071555//cell wall organization;GO:0000272//polysaccharide catabolic process;GO:0044092//negative regulation of molecular function	gi|356559248|ref|XP_003547912.1|/0/PREDICTED: pectinesterase 3 [Glycine max]
Glyma.11G254900	-	-	-	-	-	-	-	-	-	-	-	-	-	-	-	-	1.75178	up	0.000304795	0.00416734	2470	ko00500//Starch and sucrose metabolism;ko01100//Metabolic pathways;ko00520//Amino sugar and nucleotide sugar metabolism	GO:0043231//intracellular membrane-bounded organelle	GO:0016854//racemase and epimerase activity;GO:0048037//cofactor binding	GO:0044238//primary metabolic process	gi|356540097|ref|XP_003538527.1|/0/PREDICTED: UDP-glucuronate 4-epimerase 6-like [Glycine max]
Glyma.13G215000	-	-	-	-	-	-	-	-	-1.73715	down	0.000329753	0.0163511	-	-	-	-	1.74753	up	0.00366835	0.023773	2055	ko00500//Starch and sucrose metabolism;ko01100//Metabolic pathways	-	GO:0016160//amylase activity	GO:0005976//polysaccharide metabolic process	gi|356549058|ref|XP_003542915.1|/0/PREDICTED: inactive beta-amylase 9 [Glycine max]
Glyma.16G033000	-	-	-	-	-	-	-	-	-	-	-	-	-	-	-	-	1.69414	up	0.00232256	0.0172504	3241	ko00040//Pentose and glucuronate interconversions;ko00500//Starch and sucrose metabolism;ko01100//Metabolic pathways	-	GO:0004553//hydrolase activity, hydrolyzing O-glycosyl compounds	GO:0044238//primary metabolic process	gi|571525292|ref|XP_003548644.2|;gi|571525296|ref|XP_006598941.1|/0;0/PREDICTED: probable polygalacturonase isoform X1 [Glycine max];PREDICTED: probable polygalacturonase isoform X2 [Glycine max]
Glyma.02G208000	-	-	-	-	-	-	-	-	-	-	-	-	-	-	-	-	1.64538	up	0.00233085	0.0173023	2696	ko00500//Starch and sucrose metabolism;ko01100//Metabolic pathways;ko00520//Amino sugar and nucleotide sugar metabolism	-	GO:0048037//cofactor binding;GO:0016857//racemase and epimerase activity, acting on carbohydrates and derivatives	GO:0044238//primary metabolic process	gi|356500703|ref|XP_003519171.1|/0/PREDICTED: UDP-glucuronate 4-epimerase 1-like [Glycine max]
Glyma.05G152300	-	-	-	-	-	-	-	-	-	-	-	-	-	-	-	-	1.57244	up	0.00724298	0.0382298	1879	ko00500//Starch and sucrose metabolism;ko01100//Metabolic pathways;ko00520//Amino sugar and nucleotide sugar metabolism	GO:0043231//intracellular membrane-bounded organelle	GO:0016854//racemase and epimerase activity;GO:0048037//cofactor binding	GO:0044238//primary metabolic process	gi|356512447|ref|XP_003524930.1|;gi|947110527|gb|KRH58853.1|/0;0/PREDICTED: UDP-glucuronate 4-epimerase 6-like [Glycine max];hypothetical protein GLYMA_05G152300 [Glycine max]
Glyma.04G030300	-	-	-	-	-	-	-	-	-	-	-	-	-	-	-	-	1.47644	up	0.000462411	0.00549289	2955	ko00500//Starch and sucrose metabolism;ko01100//Metabolic pathways;ko00520//Amino sugar and nucleotide sugar metabolism	GO:0009536//plastid	GO:0070566//adenylyltransferase activity	GO:0005982//starch metabolic process;GO:0005977//glycogen metabolic process	gi|947112837|gb|KRH61139.1|;gi|734431667|gb|KHN45868.1|;gi|947112838|gb|KRH61140.1|;gi|571448915|ref|XP_006577992.1|/0;0;0;0/hypothetical protein GLYMA_04G030300 [Glycine max];Glucose-1-phosphate adenylyltransferase large subunit, chloroplastic/amyloplastic [Glycine soja] ;hypothetical protein GLYMA_04G030300 [Glycine max];PREDICTED: glucose-1-phosphate adenylyltransferase large subunit, chloropl…
Glyma.18G265100	-	-	-	-	-	-	-	-	-	-	-	-	-	-	-	-	1.46292	up	0.00946435	0.0460715	1846	ko00053//Ascorbate and aldarate metabolism;ko00040//Pentose and glucuronate interconversions;ko00500//Starch and sucrose metabolism;ko01100//Metabolic pathways;ko01110//Biosynthesis of secondary metabolites;ko00520//Amino sugar and nucleotide sugar metabolism	GO:0043231//intracellular membrane-bounded organelle;GO:0044444;GO:0005576//extracellular region	GO:0016616//oxidoreductase activity, acting on the CH-OH group of donors, NAD or NADP as acceptor;GO:0000166//nucleotide binding	GO:0009226//nucleotide-sugar biosynthetic process;GO:0009664//plant-type cell wall organization	gi|734354133|gb|KHN13571.1|/0/UDP-glucose 6-dehydrogenase [Glycine soja]
Glyma.17G069600	-	-	-	-	-	-	-	-	-	-	-	-	-	-	-	-	1.37586	up	0.00136851	0.0118169	2621	ko00500//Starch and sucrose metabolism;ko01100//Metabolic pathways;ko00520//Amino sugar and nucleotide sugar metabolism	-	GO:0048037//cofactor binding;GO:0016857//racemase and epimerase activity, acting on carbohydrates and derivatives	GO:0044238//primary metabolic process	gi|356562525|ref|XP_003549520.1|/0/PREDICTED: UDP-glucuronate 4-epimerase 1 [Glycine max]
Glyma.01G037900	-	-	-	-	-	-	-	-	-	-	-	-	-	-	-	-	1.31205	up	0.00317445	0.0216516	2201	ko00500//Starch and sucrose metabolism;ko01110//Biosynthesis of secondary metabolites;ko00520//Amino sugar and nucleotide sugar metabolism	-	GO:0016740//transferase activity	-	gi|356498063|ref|XP_003517873.1|/0/PREDICTED: probable galacturonosyltransferase-like 9 [Glycine max]
Glyma.14G159600	-	-	-	-	-	-	-	-	-	-	-	-	-	-	-	-	1.25984	up	0.000810376	0.00819743	2387	ko00040//Pentose and glucuronate interconversions;ko00500//Starch and sucrose metabolism;ko01100//Metabolic pathways	GO:0030312//external encapsulating structure	GO:0030234//enzyme regulator activity;GO:0052689//carboxylic ester hydrolase activity	GO:0071555//cell wall organization;GO:0000272//polysaccharide catabolic process;GO:0044092//negative regulation of molecular function	gi|955364443|ref|XP_014622596.1|/0/PREDICTED: probable pectinesterase/pectinesterase inhibitor 61 isoform X1 [Glycine max]
Glyma.06G129400	-	-	-	-	-	-	-	-	-	-	-	-	-	-	-	-	1.14575	up	0.0103995	0.0493808	2048	ko00500//Starch and sucrose metabolism;ko01100//Metabolic pathways	GO:0009532//plastid stroma	GO:0046527//glucosyltransferase activity	GO:0009059//macromolecule biosynthetic process;GO:0006073//cellular glucan metabolic process	gi|947105123|gb|KRH53506.1|/0/hypothetical protein GLYMA_06G129400, partial [Glycine max]
Glyma.13G161600	-	-	-	-	-	-	-	-	-	-	-	-	-	-	-	-	1.09513	up	0.00125033	0.0111122	4100	ko00500//Starch and sucrose metabolism;ko01100//Metabolic pathways	GO:0005911//cell-cell junction;GO:0044444;GO:0016020//membrane	GO:0035251//UDP-glucosyltransferase activity	GO:0005985//sucrose metabolic process	gi|947071288|gb|KRH20179.1|;gi|356548520|ref|XP_003542649.1|/0;0/hypothetical protein GLYMA_13G161600 [Glycine max];PREDICTED: probable sucrose-phosphate synthase [Glycine max]
Glyma.11G010400	-	-	-	-	-	-	-	-	-	-	-	-	-	-	-	-	1.01237	up	0.0103776	0.0493337	4001	ko00500//Starch and sucrose metabolism;ko01100//Metabolic pathways;ko00520//Amino sugar and nucleotide sugar metabolism	GO:0031224//intrinsic component of membrane	GO:0016759//cellulose synthase activity	GO:0030243//cellulose metabolic process	gi|356538575|ref|XP_003537778.1|/0/PREDICTED: cellulose synthase-like protein D2 [Glycine max]
Glyma.18G262500	-	-	-	-	-	-	-	-	-	-	-	-	-	-	-	-	-1.07271	down	0.00385672	0.0246465	1745	ko00040//Pentose and glucuronate interconversions;ko00500//Starch and sucrose metabolism;ko01100//Metabolic pathways	GO:0030312//external encapsulating structure	GO:0052689//carboxylic ester hydrolase activity	GO:0071555//cell wall organization;GO:0010393	gi|571549278|ref|XP_006602929.1|/0/PREDICTED: pectinesterase 31-like [Glycine max]
Glyma.02G226600	-	-	-	-	-	-	-	-	-	-	-	-	-	-	-	-	-1.07388	down	0.00302439	0.0209366	1688	ko00051//Fructose and mannose metabolism;ko00500//Starch and sucrose metabolism;ko01100//Metabolic pathways;ko00520//Amino sugar and nucleotide sugar metabolism	-	GO:0016772//transferase activity, transferring phosphorus-containing groups	GO:0032958//inositol phosphate biosynthetic process	gi|571441318|ref|XP_003518306.2|/0/PREDICTED: inositol 3-kinase-like [Glycine max]
Glyma.12G240000	-	-	-	-	-	-	-	-	-	-	-	-	-	-	-	-	-1.07497	down	0.00544285	0.0314242	1941	ko00500//Starch and sucrose metabolism;ko01100//Metabolic pathways;ko01110//Biosynthesis of secondary metabolites;ko00460//Cyanoamino acid metabolism;ko00940//Phenylpropanoid biosynthesis	GO:0005618//cell wall;GO:0043231//intracellular membrane-bounded organelle;GO:0005911//cell-cell junction	GO:0016798//hydrolase activity, acting on glycosyl bonds	GO:0071704//organic substance metabolic process;GO:0044238//primary metabolic process;GO:0000904//cell morphogenesis involved in differentiation	gi|734370810|gb|KHN19426.1|/0/Beta-glucosidase 13 [Glycine soja]
Glyma.04G008400	-	-	-	-	-	-	-	-	-	-	-	-	-	-	-	-	-1.51851	down	0.00170716	0.0137932	2008	ko00500//Starch and sucrose metabolism;ko01100//Metabolic pathways	-	GO:0016798//hydrolase activity, acting on glycosyl bonds	GO:0044238//primary metabolic process	gi|356509549|ref|XP_003523510.1|/0/PREDICTED: endoglucanase 24-like [Glycine max]
Glyma.05G236600	-	-	-	-	-	-	-	-	-	-	-	-	-	-	-	-	-1.618	down	0.00340754	0.0225963	1125	ko00040//Pentose and glucuronate interconversions;ko00500//Starch and sucrose metabolism;ko01100//Metabolic pathways	-	GO:0030234//enzyme regulator activity;GO:0052689//carboxylic ester hydrolase activity	GO:0044092//negative regulation of molecular function	gi|356513076|ref|XP_003525240.1|/2.77858e-145/PREDICTED: 21 kDa protein-like [Glycine max]
Glyma.17G044700	-	-	-	-	-	-	-	-	-	-	-	-	-1.74276	down	3.65061e-06	0.000439226	-1.72829	down	8.46081e-05	0.00166194	2227	ko00040//Pentose and glucuronate interconversions;ko00500//Starch and sucrose metabolism;ko01100//Metabolic pathways	GO:0030312//external encapsulating structure	GO:0030234//enzyme regulator activity;GO:0052689//carboxylic ester hydrolase activity	GO:0071555//cell wall organization;GO:0000272//polysaccharide catabolic process;GO:0044092//negative regulation of molecular function	gi|356564706|ref|XP_003550590.1|/0/PREDICTED: putative pectinesterase/pectinesterase inhibitor 45 [Glycine max]
Glyma.05G163600	-	-	-	-	-	-	-	-	-	-	-	-	-	-	-	-	-2.3975	down	0.00121369	0.010882	3005	ko00500//Starch and sucrose metabolism	-	GO:0019203//carbohydrate phosphatase activity;GO:0035251//UDP-glucosyltransferase activity	GO:0006796//phosphate-containing compound metabolic process;GO:0005991//trehalose metabolic process	gi|356510997|ref|XP_003524218.1|/0/PREDICTED: alpha,alpha-trehalose-phosphate synthase [UDP-forming] 1-like [Glycine max]
Glyma.06G008200	-	-	-	-	-	-	-	-	-	-	-	-	-	-	-	-	-2.57644	down	9.3622e-06	0.000332538	1895	ko00500//Starch and sucrose metabolism;ko01100//Metabolic pathways	-	GO:0016798//hydrolase activity, acting on glycosyl bonds	GO:0044238//primary metabolic process	gi|356517881|ref|XP_003527614.1|/0/PREDICTED: endoglucanase 24-like [Glycine max]
