# Supplementary material for: Transcriptome analysis identifies differentially expressed genes involved in the metabolic regulatory network of progenies from the cross of low phytic acid GmMIPS1 and GmIPK1 soybean mutants
Source: Research Square preprint supplement (doi:10.21203/rs.3.rs-112462/v1), 2020-12-01
Supplement: Supplementary file 11 [file c5305090086d475e83cb2bdb.xlsx]

## Sheet: Sheet1
DEGs involved in photosynthesis
GeneID	log2Ratio(2mlpa-1/2MWT-1)	Up-Down-Regulation(2mlpa-1/2MWT-1)	P-value	FDR	log2Ratio(2mlpa-2/2MWT-2)	Up-Down-Regulation(2mlpa-2/2MWT-2)	P-value	FDR	log2Ratio(2mlpa-3/2MWT-3)	Up-Down-Regulation(2mlpa-3/2MWT-3)	P-value	FDR	log2Ratio(2mlpa-4/2MWT-4)	Up-Down-Regulation(2mlpa-4/2MWT-4)	P-value	FDR	log2Ratio(2mlpa-5/2MWT-5)	Up-Down-Regulation(2mlpa-5/2MWT-5)			Length	Pathway	GO Component	GO Function	GO Process	Blast nr
Glyma.01G050900	-2.32919	down	6.20164e-06	0.000201106	-	-	-	-	-	-	-	-	-	-	-	-	-	-	-	-	936	ko00195//Photosynthesis;ko01100//Metabolic pathways	GO:0031976;GO:0009523//photosystem II	GO:0046872//metal ion binding;GO:0009055//electron carrier activity	GO:0022900//electron transport chain	gi|571434179|ref|XP_003518016.2|/6.70419e-155/PREDICTED: photosynthetic NDH subunit of lumenal location 2, chloroplastic [Glycine max]
Glyma.01G095900	-1.53055	down	4.03914e-05	0.000954589	3.87635	up	1.66745e-18	6.19409e-16	3.59217	up	1.29053e-08	1.72137e-06	2.51069	up	1.11727e-05	0.00117325	-	-	-	-	293	ko00195//Photosynthesis;ko01100//Metabolic pathways	GO:0009523//photosystem II;GO:0009507//chloroplast	-	GO:0015979//photosynthesis	gi|947127748|gb|KRH75602.1|/3.04979e-23/hypothetical protein GLYMA_01G095900 [Glycine max]
Glyma.01G153500	-1.53334	down	0.00124594	0.0147845	3.85582	up	3.34565e-13	7.77876e-11	4.15308	up	2.54592e-09	3.75677e-07	2.95855	up	2.13041e-05	0.00206226	-	-	-	-	750	ko00195//Photosynthesis;ko01100//Metabolic pathways	GO:0009521;GO:0031224//intrinsic component of membrane;GO:0009534//chloroplast thylakoid	GO:0046914//transition metal ion binding;GO:0009055//electron carrier activity;GO:0003824//catalytic activity	GO:0009767//photosynthetic electron transport chain	gi|947128606|gb|KRH76460.1|/0/hypothetical protein GLYMA_01G153500 [Glycine max]
Glyma.05G073600	-	-	-	-	8.09189	up	2.08312e-11	4.13021e-09	-	-	-	-	-	-	-	-	-	-	-	-	426	ko00195//Photosynthesis;ko01100//Metabolic pathways	GO:0043231//intracellular membrane-bounded organelle	GO:0009055//electron carrier activity	GO:0009767//photosynthetic electron transport chain	gi|947109303|gb|KRH57629.1|/2.58432e-50/hypothetical protein GLYMA_05G073600 [Glycine max]
Glyma.06G217900	-2.08522	down	1.18254e-07	6.04258e-06	3.69572	up	9.9952e-15	2.56369e-12	4.21351	up	4.04215e-15	1.58292e-12	3.21924	up	5.21181e-08	1.06085e-05	-	-	-	-	507	ko00195//Photosynthesis;ko01100//Metabolic pathways	GO:0009521;GO:0031224//intrinsic component of membrane;GO:0009534//chloroplast thylakoid	GO:0046914//transition metal ion binding;GO:0009055//electron carrier activity;GO:0003824//catalytic activity	GO:0009767//photosynthetic electron transport chain	gi|947106520|gb|KRH54903.1|/3.69129e-118/hypothetical protein GLYMA_06G217900 [Glycine max]
Glyma.06G224500	-	-	-	-	4.46157	up	1.13904e-19	4.48921e-17	7.11534	up	1.37509e-10	2.48533e-08	-	-	-	-	-	-	-	-	279	ko00195//Photosynthesis;ko01100//Metabolic pathways	GO:0009521;GO:0031224//intrinsic component of membrane;GO:0009534//chloroplast thylakoid	GO:0046906//tetrapyrrole binding;GO:0046872//metal ion binding;GO:0051536//iron-sulfur cluster binding;GO:0003824//catalytic activity	GO:0006464//cellular protein modification process;GO:0044710	gi|947106622|gb|KRH55005.1|/1.83252e-63/hypothetical protein GLYMA_06G224500, partial [Glycine max]
Glyma.06G229000	-2.38221	down	0.000738654	0.00998654	2.7897	up	6.89072e-09	1.04063e-06	4.99319	up	2.86337e-10	4.94134e-08	-	-	-	-	-	-	-	-	417	ko00195//Photosynthesis;ko00190//Oxidative phosphorylation;ko01100//Metabolic pathways	GO:0031224//intrinsic component of membrane;GO:0033177//proton-transporting two-sector ATPase complex, proton-transporting domain;GO:0009534//chloroplast thylakoid	GO:0015077//monovalent inorganic cation transmembrane transporter activity;GO:0005488	GO:0015988//energy coupled proton transmembrane transport, against electrochemical gradient;GO:0006754//ATP biosynthetic process	gi|947106696|gb|KRH55079.1|/4.411e-37/hypothetical protein GLYMA_06G229000 [Glycine max]
Glyma.07G143800	-	-	-	-	5.05164	up	5.42203e-27	4.38073e-24	6.50017	up	9.31353e-13	2.44733e-10	-	-	-	-	-	-	-	-	348	ko00195//Photosynthesis;ko01100//Metabolic pathways	GO:0009521;GO:0031224//intrinsic component of membrane;GO:0009534//chloroplast thylakoid	GO:0046906//tetrapyrrole binding;GO:0046872//metal ion binding;GO:0051536//iron-sulfur cluster binding;GO:0003824//catalytic activity	GO:0006464//cellular protein modification process;GO:0044710	gi|734395058|gb|KHN28788.1|/1.56572e-70/Photosystem I P700 chlorophyll a apoprotein A1 [Glycine soja]
Glyma.08G281300	-	-	-	-	3.99838	up	1.12332e-19	4.48189e-17	5.44119	up	4.16276e-20	3.6329e-17	2.99514	up	0.000186122	0.0115715	-	-	-	-	324	ko00195//Photosynthesis;ko01100//Metabolic pathways	GO:0031224//intrinsic component of membrane;GO:0034357;GO:0009536//plastid	GO:0046906//tetrapyrrole binding	GO:0006464//cellular protein modification process;GO:0022900//electron transport chain	gi|947096990|gb|KRH45575.1|/1.40663e-74/hypothetical protein GLYMA_08G281300 [Glycine max]
Glyma.08G363500	-1.35415	down	0.00236377	0.0237614	4.01677	up	3.47408e-16	1.01149e-13	3.98983	up	2.09732e-09	3.15579e-07	2.57728	up	0.000109032	0.0076807	-	-	-	-	621	ko00195//Photosynthesis;ko01100//Metabolic pathways	GO:0034357	-	-	gi|947098318|gb|KRH46903.1|/9.44696e-19/hypothetical protein GLYMA_08G363500 [Glycine max]
Glyma.11G162200	-	-	-	-	3.7818	up	1.2894e-19	4.9608e-17	3.51122	up	2.58539e-09	3.79667e-07	1.71363	up	0.000303482	0.0167637	-	-	-	-	699	ko00195//Photosynthesis;ko01100//Metabolic pathways	GO:0009521;GO:0031224//intrinsic component of membrane	GO:0043169//cation binding;GO:0009055//electron carrier activity	GO:0009767//photosynthetic electron transport chain	gi|947081354|gb|KRH30143.1|/9.45488e-155/hypothetical protein GLYMA_11G162200, partial [Glycine max]
Glyma.12G169400	-1.35822	down	0.00316501	0.0295421	-	-	-	-	-	-	-	-	-	-	-	-	-	-	-	-	1122	ko00195//Photosynthesis	GO:0009536//plastid	GO:0005488	-	gi|947077519|gb|KRH26359.1|/3.82053e-90/hypothetical protein GLYMA_12G169400 [Glycine max]
Glyma.12G202500	-	-	-	-	-	-	-	-	1.34376	up	0.000504414	0.0226025	1.30934	up	4.45557e-05	0.00369862	-	-	-	-	1010	ko00195//Photosynthesis;ko01100//Metabolic pathways	GO:0009534//chloroplast thylakoid	-	GO:0019684//photosynthesis, light reaction	gi|356543813|ref|XP_003540354.1|/6.4337e-96/PREDICTED: photosystem II repair protein PSB27-H1, chloroplastic-like [Glycine max]
Glyma.12G232700	-	-	-	-	5.52159	up	6.31397e-28	5.515e-25	5.20226	up	1.28991e-10	2.3593e-08	3.29685	up	1.82588e-06	0.000241162	-	-	-	-	429	ko00195//Photosynthesis;ko01100//Metabolic pathways	GO:0031224//intrinsic component of membrane;GO:0009523//photosystem II;GO:0009534//chloroplast thylakoid	GO:0046914//transition metal ion binding;GO:0032550;GO:0016421//CoA carboxylase activity;GO:0046906//tetrapyrrole binding	GO:0015937//coenzyme A biosynthetic process;GO:0006351//transcription, DNA-templated;GO:0022900//electron transport chain;GO:0009765//photosynthesis, light harvesting;GO:0006631//fatty acid metabolic process	gi|947078548|gb|KRH27388.1|/1.04111e-99/hypothetical protein GLYMA_12G232700 [Glycine max]
Glyma.13G028200	-	-	-	-	3.83427	up	1.88219e-21	8.56741e-19	2.99907	up	6.69607e-06	0.000546876	1.79323	up	0.000163629	0.0104575	-	-	-	-	816	ko00195//Photosynthesis;ko01100//Metabolic pathways	GO:0009521;GO:0031224//intrinsic component of membrane;GO:0009534//chloroplast thylakoid	GO:0046914//transition metal ion binding;GO:0009055//electron carrier activity;GO:0003824//catalytic activity	GO:0006950//response to stress;GO:0009767//photosynthetic electron transport chain	gi|947069046|gb|KRH17937.1|/0/hypothetical protein GLYMA_13G028200, partial [Glycine max]
Glyma.13G088500	-	-	-	-	3.65135	up	7.24004e-09	1.0883e-06	5.60027	up	5.33168e-11	1.05751e-08	-	-	-	-	-	-	-	-	240	ko00195//Photosynthesis;ko01100//Metabolic pathways	GO:0009521;GO:0009534//chloroplast thylakoid	GO:0043169//cation binding;GO:0051536//iron-sulfur cluster binding;GO:0050136//NADH dehydrogenase (quinone) activity	GO:0009767//photosynthetic electron transport chain;GO:0022904//respiratory electron transport chain	gi|947070006|gb|KRH18897.1|/6.89749e-54/hypothetical protein GLYMA_13G088500 [Glycine max]
Glyma.15G114600	-1.49066	down	0.000376796	0.00585596	3.91924	up	1.2492e-19	4.86404e-17	5.49734	up	2.00927e-20	1.80509e-17	3.02382	up	2.57469e-05	0.00239858	-	-	-	-	1190	ko00195//Photosynthesis;ko01100//Metabolic pathways	GO:0031224//intrinsic component of membrane;GO:0034357;GO:0009534//chloroplast thylakoid	GO:0009055//electron carrier activity;GO:0003824//catalytic activity	GO:0022900//electron transport chain	gi|947062266|gb|KRH11527.1|/2.61757e-86/hypothetical protein GLYMA_15G114600 [Glycine max]
Glyma.15G126100	-	-	-	-	4.07773	up	5.53488e-20	2.26426e-17	4.93214	up	4.03042e-10	6.72727e-08	3.73562	up	1.91335e-07	3.40485e-05	-	-	-	-	363	ko00195//Photosynthesis;ko01100//Metabolic pathways	GO:0009521;GO:0031224//intrinsic component of membrane;GO:0009534//chloroplast thylakoid	-	GO:0044237//cellular metabolic process	gi|91214162|ref|YP_538784.1|/4.7294e-24/photosystem I subunit IX [Glycine max]
Glyma.15G208300	-	-	-	-	3.13165	up	5.66775e-07	7.15509e-05	-	-	-	-	-	-	-	-	-	-	-	-	273	ko00195//Photosynthesis;ko01100//Metabolic pathways	GO:0009521;GO:0031224//intrinsic component of membrane;GO:0009534//chloroplast thylakoid	-	GO:0006091//generation of precursor metabolites and energy	gi|763745629|gb|KJB13068.1|/1.93912e-15/hypothetical protein B456_002G055100 [Gossypium raimondii]
Glyma.15G248600	-	-	-	-	3.14569	up	2.13594e-09	3.43429e-07	2.81734	up	7.23084e-05	0.00454457	-	-	-	-	-	-	-	-	342	ko00195//Photosynthesis;ko01100//Metabolic pathways	GO:0009536//plastid;GO:0009523//photosystem II	-	GO:0044237//cellular metabolic process	gi|947064317|gb|KRH13578.1|/5.67331e-75/hypothetical protein GLYMA_15G248600 [Glycine max]
Glyma.17G186400	-	-	-	-	3.90764	up	5.60817e-08	7.91462e-06	5.2486	up	1.19209e-08	1.59703e-06	-	-	-	-	-	-	-	-	207	ko00195//Photosynthesis;ko01100//Metabolic pathways	GO:0009521;GO:0031224//intrinsic component of membrane;GO:0009534//chloroplast thylakoid	GO:0043168//anion binding	GO:0044237//cellular metabolic process;GO:0031647//regulation of protein stability	gi|947055325|gb|KRH04778.1|/3.72484e-44/hypothetical protein GLYMA_17G186400 [Glycine max]
Glyma.19G054200	-2.08218	down	0.00014211	0.00262899	2.22477	up	0.000138808	0.0112713	4.32237	up	2.29618e-06	0.000211255	-	-	-	-	-	-	-	-	318	ko00195//Photosynthesis;ko00190//Oxidative phosphorylation;ko01100//Metabolic pathways	GO:0031224//intrinsic component of membrane;GO:0033177//proton-transporting two-sector ATPase complex, proton-transporting domain;GO:0009534//chloroplast thylakoid	GO:0019829//cation-transporting ATPase activity;GO:0015077//monovalent inorganic cation transmembrane transporter activity	GO:0015986//ATP synthesis coupled proton transport	gi|947044351|gb|KRG93980.1|/2.03094e-59/hypothetical protein GLYMA_19G054200 [Glycine max]
Glyma.20G020600	1.57644	up	0.00398089	0.0348716	-	-	-	-	-	-	-	-	-	-	-	-	-	-	-	-	925	ko00195//Photosynthesis	-	-	-	gi|571563659|ref|XP_006605511.1|;gi|955391318|ref|XP_014627811.1|/1.21678e-120;1.45013e-102/PREDICTED: , chloroplastic-like isoform X1 [Glycine max];PREDICTED: uncharacterized protein LOC100797820 isoform X2 [Glycine max]
Glyma.05G099200	-2.65397	down	3.46236e-07	1.59085e-05	2.68556	up	1.84914e-09	3.00303e-07	4.99906	up	1.21001e-11	2.69778e-09	-	-	-	-	5.82843	up	3.78975e-06	0.000168099	271	ko00195//Photosynthesis;ko00190//Oxidative phosphorylation;ko01100//Metabolic pathways	GO:0031224//intrinsic component of membrane;GO:0033177//proton-transporting two-sector ATPase complex, proton-transporting domain;GO:0009534//chloroplast thylakoid;GO:0009526//plastid envelope	GO:0015077//monovalent inorganic cation transmembrane transporter activity;GO:0005488	GO:0019684//photosynthesis, light reaction;GO:0015988//energy coupled proton transmembrane transport, against electrochemical gradient;GO:0006351//transcription, DNA-templated;GO:0006754//ATP biosynthetic process	gi|947109669|gb|KRH57995.1|/7.86592e-52/hypothetical protein GLYMA_05G099200, partial [Glycine max]
Glyma.04G095000	-2.25764	down	1.15874e-07	5.92998e-06	3.87018	up	1.63756e-15	4.56231e-13	4.11517	up	3.2181e-14	1.11701e-11	3.56279	up	9.7899e-11	2.66914e-08	4.10345	up	1.80892e-06	9.51887e-05	711	ko00195//Photosynthesis;ko01100//Metabolic pathways	GO:0009521;GO:0031224//intrinsic component of membrane;GO:0043231//intracellular membrane-bounded organelle	GO:0043169//cation binding;GO:0009055//electron carrier activity	GO:0009767//photosynthetic electron transport chain	gi|947113933|gb|KRH62235.1|/1.4233e-107/hypothetical protein GLYMA_04G095000 [Glycine max]
Glyma.12G231900	-2.38509	down	8.45255e-10	6.90223e-08	3.23154	up	1.60139e-14	4.04327e-12	4.88738	up	3.61766e-18	2.35109e-15	2.43866	up	0.000212089	0.0128696	3.81275	up	1.12184e-08	1.72021e-06	384	ko00195//Photosynthesis;ko00190//Oxidative phosphorylation;ko01100//Metabolic pathways	GO:0031224//intrinsic component of membrane;GO:0033177//proton-transporting two-sector ATPase complex, proton-transporting domain;GO:0009534//chloroplast thylakoid	GO:0032550;GO:0019829//cation-transporting ATPase activity;GO:0015077//monovalent inorganic cation transmembrane transporter activity	GO:0006818//hydrogen transport;GO:0006754//ATP biosynthetic process	gi|947078540|gb|KRH27380.1|/1.10934e-66/hypothetical protein GLYMA_12G231900, partial [Glycine max]
Glyma.19G109600	-2.57295	down	1.09384e-07	5.64065e-06	2.83652	up	3.40754e-16	1.00114e-13	4.74518	up	2.94296e-15	1.19857e-12	-	-	-	-	3.76104	up	1.27067e-07	1.26716e-05	423	ko00195//Photosynthesis;ko00190//Oxidative phosphorylation;ko01100//Metabolic pathways	GO:0031224//intrinsic component of membrane;GO:0033177//proton-transporting two-sector ATPase complex, proton-transporting domain;GO:0009534//chloroplast thylakoid;GO:0009526//plastid envelope	GO:0019829//cation-transporting ATPase activity;GO:0015077//monovalent inorganic cation transmembrane transporter activity;GO:0005488	GO:0015988//energy coupled proton transmembrane transport, against electrochemical gradient;GO:0015986//ATP synthesis coupled proton transport	gi|947045161|gb|KRG94790.1|/9.26156e-42/hypothetical protein GLYMA_19G109600 [Glycine max]
Glyma.U016600	-	-	-	-	4.76174	up	6.26137e-31	9.19795e-28	6.62145	up	1.61085e-16	8.48337e-14	2.84707	up	0.000285407	0.0160639	3.61362	up	0.000920913	0.00899191	375	ko00195//Photosynthesis;ko01100//Metabolic pathways	GO:0009521;GO:0031224//intrinsic component of membrane;GO:0009534//chloroplast thylakoid	GO:0046906//tetrapyrrole binding;GO:0046872//metal ion binding;GO:0051536//iron-sulfur cluster binding;GO:0003824//catalytic activity	GO:0006464//cellular protein modification process;GO:0044710	gi|947039131|gb|KRG88966.1|/8.09939e-73/hypothetical protein GLYMA_U016600, partial [Glycine max]
Glyma.12G232900	-2.36417	down	7.62609e-21	3.13646e-18	3.57447	up	1.91019e-19	7.26275e-17	5.67099	up	5.36321e-20	4.55054e-17	2.3048	up	0.000368539	0.0193845	3.57215	up	7.79755e-09	1.2636e-06	1912	ko00195//Photosynthesis;ko01100//Metabolic pathways	GO:0034357;GO:0009534//chloroplast thylakoid;GO:0016021//integral component of membrane	GO:0046906//tetrapyrrole binding;GO:0046914//transition metal ion binding	GO:0044237//cellular metabolic process;GO:0044710	gi|91214155|ref|YP_538777.1|/0/cytochrome f [Glycine max]
Glyma.12G232500	-2.34047	down	3.07594e-08	1.81993e-06	4.62078	up	2.88726e-23	1.53147e-20	5.63807	up	2.47171e-16	1.21771e-13	3.32027	up	1.64154e-07	2.95656e-05	3.17592	up	0.000384819	0.0048478	1023	ko00195//Photosynthesis;ko01100//Metabolic pathways	GO:0034357;GO:0031224//intrinsic component of membrane;GO:0009532//plastid stroma;GO:0009534//chloroplast thylakoid	GO:0009055//electron carrier activity;GO:0043169//cation binding	GO:0019684//photosynthesis, light reaction;GO:0006351//transcription, DNA-templated;GO:0006412//translation;GO:0022900//electron transport chain;GO:0010038//response to metal ion;GO:0043623//cellular protein complex assembly;GO:0055076//transition metal ion homeostasis;GO:0009416//response to light stimulus	gi|11465978|ref|NP_054520.1|/6.06418e-18/cytochrome b6/f complex subunit V [Nicotiana tabacum]
Glyma.01G058600	-1.86771	down	1.41951e-05	0.000404332	3.96422	up	1.96817e-18	7.14689e-16	5.64774	up	4.80166e-19	3.76068e-16	3.38744	up	2.16135e-05	0.00208542	2.94009	up	0.00323	0.0218715	463	ko00195//Photosynthesis;ko01100//Metabolic pathways	GO:0031224//intrinsic component of membrane;GO:0034357;GO:0009534//chloroplast thylakoid	GO:0046906//tetrapyrrole binding;GO:0046914//transition metal ion binding;GO:0009055//electron carrier activity;GO:0003824//catalytic activity	GO:0022900//electron transport chain	gi|947127189|gb|KRH75043.1|/2.29292e-78/hypothetical protein GLYMA_01G058600 [Glycine max]
Glyma.11G114700	-1.6986	down	9.95959e-06	0.000299632	3.78507	up	4.79241e-17	1.53348e-14	4.29086	up	4.91227e-13	1.41552e-10	2.74467	up	1.36161e-07	2.51332e-05	2.5227	up	0.0024435	0.0178512	408	ko00195//Photosynthesis;ko01100//Metabolic pathways	GO:0031224//intrinsic component of membrane;GO:0034357;GO:0009536//plastid	GO:0046906//tetrapyrrole binding	GO:0006464//cellular protein modification process;GO:0022900//electron transport chain	gi|947080624|gb|KRH29413.1|/2.22449e-94/hypothetical protein GLYMA_11G114700 [Glycine max]
Glyma.09G090100	-1.33105	down	0.00414616	0.0359458	4.85917	up	5.25212e-26	3.77195e-23	6.41069	up	2.8411e-13	8.59223e-11	4.45229	up	9.96896e-08	1.89909e-05	2.52239	up	0.00568726	0.0323957	558	ko00195//Photosynthesis;ko01100//Metabolic pathways	GO:0009521;GO:0031224//intrinsic component of membrane;GO:0009536//plastid	-	GO:0044237//cellular metabolic process	gi|947089135|gb|KRH37800.1|/7.49414e-119/hypothetical protein GLYMA_09G090100, partial [Glycine max]
Glyma.12G096200	-2.61989	down	9.58563e-15	1.75693e-12	2.01925	up	2.74613e-08	3.96203e-06	4.32398	up	4.1682e-12	9.94668e-10	-	-	-	-	2.46085	up	0.000100672	0.0018828	318	ko00195//Photosynthesis;ko00190//Oxidative phosphorylation;ko01100//Metabolic pathways	GO:0031224//intrinsic component of membrane;GO:0033177//proton-transporting two-sector ATPase complex, proton-transporting domain;GO:0009534//chloroplast thylakoid	GO:0019829//cation-transporting ATPase activity;GO:0015077//monovalent inorganic cation transmembrane transporter activity	GO:0015986//ATP synthesis coupled proton transport	gi|947076502|gb|KRH25342.1|/4.62789e-71/hypothetical protein GLYMA_12G096200, partial [Glycine max]
Glyma.12G232000	-1.76107	down	9.51855e-09	6.28206e-07	3.48479	up	3.65911e-18	1.28538e-15	4.64109	up	5.20979e-17	3.00251e-14	2.41548	up	3.45776e-05	0.0030312	2.15131	up	2.10101e-05	0.000604672	2784	ko00195//Photosynthesis;ko00190//Oxidative phosphorylation;ko01100//Metabolic pathways	GO:0033178//proton-transporting two-sector ATPase complex, catalytic domain;GO:0019866//organelle inner membrane;GO:0009534//chloroplast thylakoid	GO:0032550;GO:0019829//cation-transporting ATPase activity;GO:0015078//hydrogen ion transmembrane transporter activity	GO:0015988//energy coupled proton transmembrane transport, against electrochemical gradient;GO:0015986//ATP synthesis coupled proton transport	gi|947078541|gb|KRH27381.1|/0/hypothetical protein GLYMA_12G232000 [Glycine max]
Glyma.05G074900	-1.80329	down	1.74478e-06	6.60413e-05	3.92446	up	4.56019e-17	1.47376e-14	4.21531	up	2.83293e-13	8.59223e-11	3.45592	up	1.25417e-09	3.10594e-07	2.06823	up	0.00578892	0.0327396	439	ko00195//Photosynthesis;ko01100//Metabolic pathways	GO:0016020//membrane;GO:0044424	-	GO:0044237//cellular metabolic process	gi|947109318|gb|KRH57644.1|/8.28695e-19/hypothetical protein GLYMA_05G074900 [Glycine max]
Glyma.04G066000	-	-	-	-	-	-	-	-	-	-	-	-	-	-	-	-	-1.07659	down	0.00596736	0.0334503	1289	ko00195//Photosynthesis;ko00190//Oxidative phosphorylation;ko01100//Metabolic pathways	GO:0044434;GO:0044425;GO:0009579//thylakoid	-	GO:0044765	gi|351722297|ref|NP_001237239.1|/7.45658e-115/uncharacterized protein LOC100527009 [Glycine max]
Glyma.18G241700	-	-	-	-	-	-	-	-	-	-	-	-	1.09562	up	0.000369596	0.0194058	-1.12117	down	0.00138027	0.0118718	1010	ko00195//Photosynthesis;ko01100//Metabolic pathways	GO:0009526//plastid envelope;GO:0031976;GO:0009570//chloroplast stroma;GO:0009522//photosystem I	-	GO:0044237//cellular metabolic process	gi|351724071|ref|NP_001236277.1|/7.26819e-124/uncharacterized protein LOC100500317 [Glycine max]
Glyma.11G077600	-	-	-	-	-	-	-	-	-	-	-	-	-	-	-	-	-1.18643	down	0.00111592	0.010211	1442	ko00195//Photosynthesis;ko01100//Metabolic pathways	GO:0009526//plastid envelope;GO:0031976;GO:0044436;GO:0005576//extracellular region	GO:0009055//electron carrier activity;GO:0008187//poly-pyrimidine tract binding;GO:0003824//catalytic activity	GO:0009617//response to bacterium;GO:0022900//electron transport chain	gi|734422972|gb|KHN41893.1|/0/Ferredoxin--NADP reductase, leaf isozyme, chloroplastic [Glycine soja]
Glyma.16G127300	-	-	-	-	-	-	-	-	-	-	-	-	-	-	-	-	-1.1959	down	0.00740232	0.038825	1628	ko00195//Photosynthesis;ko01100//Metabolic pathways	GO:0009526//plastid envelope;GO:0031976;GO:0044436;GO:0005576//extracellular region	GO:0009055//electron carrier activity;GO:0008187//poly-pyrimidine tract binding;GO:0003824//catalytic activity;GO:0016731//oxidoreductase activity, acting on iron-sulfur proteins as donors, NAD or NADP as acceptor	GO:0009617//response to bacterium;GO:0022900//electron transport chain	gi|356559282|ref|XP_003547929.1|;gi|947058656|gb|KRH08062.1|/0;0/PREDICTED: ferredoxin--NADP reductase, leaf isozyme, chloroplastic [Glycine max];hypothetical protein GLYMA_16G127300 [Glycine max]
Glyma.12G089200	-	-	-	-	-	-	-	-	-	-	-	-	-	-	-	-	-1.22626	down	0.00140906	0.0120684	784	ko00195//Photosynthesis	-	GO:0051536//iron-sulfur cluster binding;GO:0043169//cation binding	GO:0006091//generation of precursor metabolites and energy	gi|351721230|ref|NP_001238738.1|/2.55515e-98/uncharacterized protein LOC100499711 [Glycine max]
Glyma.01G238000	-	-	-	-	-	-	-	-	-	-	-	-	-	-	-	-	-1.23545	down	0.00761086	0.039604	818	ko00195//Photosynthesis	GO:0009536//plastid	GO:0051536//iron-sulfur cluster binding;GO:0043169//cation binding	GO:0006091//generation of precursor metabolites and energy	gi|351725193|ref|NP_001236060.1|/2.57228e-92/uncharacterized protein LOC100500300 [Glycine max]
Glyma.20G110800	-	-	-	-	-	-	-	-	-	-	-	-	-	-	-	-	-1.34553	down	0.000894675	0.00881417	988	ko00195//Photosynthesis	-	GO:0051536//iron-sulfur cluster binding;GO:0043169//cation binding	GO:0006091//generation of precursor metabolites and energy	gi|351727909|ref|NP_001236409.1|/2.3486e-111/uncharacterized protein LOC100500583 [Glycine max]
Glyma.13G302900	-	-	-	-	-	-	-	-	-	-	-	-	-	-	-	-	-1.45364	down	0.00261157	0.0187618	1060	ko00195//Photosynthesis;ko01100//Metabolic pathways	GO:0031224//intrinsic component of membrane;GO:0009526//plastid envelope;GO:0031976;GO:0034357	GO:0043169//cation binding;GO:0015078//hydrogen ion transmembrane transporter activity;GO:0051536//iron-sulfur cluster binding;GO:0009055//electron carrier activity;GO:0052880	GO:1990066;GO:0044710;GO:0009617//response to bacterium;GO:0044237//cellular metabolic process;GO:0015992//proton transport	gi|947073587|gb|KRH22478.1|;gi|734413144|gb|KHN36589.1|/1.21441e-85;1.16363e-156/hypothetical protein GLYMA_13G302900 [Glycine max];Cytochrome b6-f complex iron-sulfur subunit, chloroplastic [Glycine soja]
Glyma.20G098500	-	-	-	-	-	-	-	-	-	-	-	-	-	-	-	-	-1.46051	down	0.000426688	0.00518614	1412	ko00195//Photosynthesis;ko01100//Metabolic pathways	GO:0009523//photosystem II	GO:0046872//metal ion binding	GO:0044237//cellular metabolic process	gi|947040828|gb|KRG90552.1|/0/hypothetical protein GLYMA_20G098500 [Glycine max]
Glyma.10G042100	-	-	-	-	-	-	-	-	-	-	-	-	-	-	-	-	-1.48158	down	0.000249067	0.00359495	1020	ko00195//Photosynthesis;ko01100//Metabolic pathways	GO:0044434;GO:0009522//photosystem I	-	-	gi|351727413|ref|NP_001236392.1|/1.41727e-61/uncharacterized protein LOC100499814 [Glycine max]
Glyma.08G126800	-	-	-	-	-	-	-	-	-	-	-	-	-	-	-	-	-1.51982	down	2.97252e-05	0.000786349	1086	ko00195//Photosynthesis	GO:0009536//plastid	GO:0043169//cation binding;GO:0051536//iron-sulfur cluster binding	GO:0022900//electron transport chain	gi|351720711|ref|NP_001235138.1|/1.61599e-102/uncharacterized protein LOC100305932 [Glycine max]
Glyma.04G215800	-	-	-	-	-	-	-	-	-	-	-	-	-	-	-	-	-1.53027	down	0.00102756	0.00966914	1219	ko00195//Photosynthesis;ko01100//Metabolic pathways	GO:0009522//photosystem I;GO:0009534//chloroplast thylakoid;GO:0034357;GO:0009507//chloroplast;GO:0009579//thylakoid	GO:0005515//protein binding	GO:0006007//glucose catabolic process;GO:0006470//protein dephosphorylation;GO:0000097//sulfur amino acid biosynthetic process;GO:0009767//photosynthetic electron transport chain	gi|947115793|gb|KRH64095.1|;gi|947115794|gb|KRH64096.1|;gi|947115791|gb|KRH64093.1|;gi|351722715|ref|NP_001235206.1|/1.61686e-78;4.64534e-50;3.80265e-116;6.1549e-101/hypothetical protein GLYMA_04G215800 [Glycine max];hypothetical protein GLYMA_04G215800 [Glycine max];hypothetical protein GLYMA_04G215800 [Glycine max];uncharacterized protein LOC100499729 [Glycine max]
Glyma.15G016300	-	-	-	-	-	-	-	-	-	-	-	-	-	-	-	-	-1.54517	down	0.00413022	0.0259182	1316	ko00195//Photosynthesis;ko01100//Metabolic pathways	GO:0031976;GO:0009570//chloroplast stroma;GO:0009522//photosystem I	-	GO:0044237//cellular metabolic process	gi|358248194|ref|NP_001240092.1|/1.2461e-69/uncharacterized protein LOC100776789 [Glycine max]
Glyma.06G150300	-	-	-	-	-	-	-	-	-	-	-	-	-	-	-	-	-1.55636	down	7.6655e-05	0.00154949	1140	ko00195//Photosynthesis;ko01100//Metabolic pathways	GO:0009521;GO:0009534//chloroplast thylakoid;GO:0034357	GO:0005515//protein binding	GO:0044237//cellular metabolic process	gi|947105477|gb|KRH53860.1|;gi|351725111|ref|NP_001236569.1|/2.80026e-87;1.3001e-109/hypothetical protein GLYMA_06G150300 [Glycine max];uncharacterized protein LOC100306036 [Glycine max]
Glyma.08G173700	-	-	-	-	-	-	-	-	-	-	-	-	-	-	-	-	-1.57747	down	2.25793e-05	0.000640144	874	ko00195//Photosynthesis;ko01100//Metabolic pathways	GO:0009523//photosystem II;GO:0009534//chloroplast thylakoid	-	GO:0010207//photosystem II assembly	gi|351722140|ref|NP_001235442.1|/2.65135e-85/uncharacterized protein LOC100499745 [Glycine max]
Glyma.01G180800	-	-	-	-	-	-	-	-	-	-	-	-	-	-	-	-	-1.57966	down	4.72344e-06	0.000200675	1339	ko00195//Photosynthesis;ko01100//Metabolic pathways	GO:0031224//intrinsic component of membrane;GO:0009523//photosystem II;GO:0019867//outer membrane	GO:0046872//metal ion binding	GO:0042548//regulation of photosynthesis, light reaction	gi|359806573|ref|NP_001241522.1|/0/uncharacterized protein LOC100820458 [Glycine max]
Glyma.05G172300	-	-	-	-	-	-	-	-	-	-	-	-	-	-	-	-	-1.58455	down	7.39255e-06	0.00027779	1447	ko00195//Photosynthesis;ko01100//Metabolic pathways	GO:0044425	-	-	gi|359806150|ref|NP_001240940.1|/3.50724e-96/uncharacterized protein LOC100779397 [Glycine max]
Glyma.09G250800	-	-	-	-	-	-	-	-	-	-	-	-	-	-	-	-	-1.60181	down	2.64113e-05	0.00071809	1307	ko00195//Photosynthesis;ko01100//Metabolic pathways	GO:0009526//plastid envelope;GO:0031976;GO:0009570//chloroplast stroma;GO:0009522//photosystem I	-	GO:0044237//cellular metabolic process	gi|351726365|ref|NP_001236868.1|/2.01874e-134/uncharacterized protein LOC100527240 [Glycine max]
Glyma.10G032200	-	-	-	-	-	-	-	-	-	-	-	-	1.55529	up	2.58319e-06	0.00031722	-1.60471	down	9.85658e-06	0.00034388	1332	ko00195//Photosynthesis;ko01100//Metabolic pathways	GO:0016020//membrane;GO:0044424	-	-	gi|351721030|ref|NP_001236684.1|/2.08586e-35/uncharacterized protein LOC100305788 [Glycine max]
Glyma.15G253700	-	-	-	-	-	-	-	-	-	-	-	-	-	-	-	-	-1.67369	down	7.90511e-06	0.000291826	840	ko00195//Photosynthesis;ko01100//Metabolic pathways	GO:0009523//photosystem II;GO:0009534//chloroplast thylakoid	-	GO:0010207//photosystem II assembly	gi|351722402|ref|NP_001236219.1|/1.48811e-84/uncharacterized protein LOC100305752 [Glycine max]
Glyma.02G047600	-	-	-	-	-	-	-	-	-	-	-	-	-	-	-	-	-1.6875	down	0.00759014	0.0395322	1494	ko00195//Photosynthesis;ko01100//Metabolic pathways	GO:0009526//plastid envelope;GO:0031976;GO:0044436;GO:0005576//extracellular region	GO:0016731//oxidoreductase activity, acting on iron-sulfur proteins as donors, NAD or NADP as acceptor;GO:0009055//electron carrier activity;GO:0008187//poly-pyrimidine tract binding	GO:0009617//response to bacterium;GO:0022900//electron transport chain	gi|734312293|gb|KHN00471.1|/0/Ferredoxin--NADP reductase, leaf isozyme, chloroplastic [Glycine soja]
Glyma.04G112800	-	-	-	-	-	-	-	-	-	-	-	-	-	-	-	-	-1.69011	down	3.70317e-05	0.000924044	1366	ko00195//Photosynthesis;ko01100//Metabolic pathways	GO:0009522//photosystem I;GO:0009526//plastid envelope;GO:0031976	GO:0046906//tetrapyrrole binding	GO:0009767//photosynthetic electron transport chain;GO:0031647//regulation of protein stability;GO:0042548//regulation of photosynthesis, light reaction;GO:0006740//NADPH regeneration	gi|351727473|ref|NP_001236650.1|/6.49139e-99/uncharacterized protein LOC100305786 [Glycine max]
Glyma.11G183300	-	-	-	-	-	-	-	-	-	-	-	-	-	-	-	-	-1.69829	down	0.000295422	0.00407434	1620	ko00195//Photosynthesis	-	GO:0051536//iron-sulfur cluster binding;GO:0043169//cation binding	GO:0006091//generation of precursor metabolites and energy	gi|359807123|ref|NP_001241349.1|/2.88363e-100/uncharacterized protein LOC100785611 [Glycine max]
Glyma.10G249000	-	-	-	-	-	-	-	-	-	-	-	-	-	-	-	-	-1.72277	down	9.49866e-06	0.000334872	1706	ko00195//Photosynthesis;ko01100//Metabolic pathways	GO:0009526//plastid envelope;GO:0031976;GO:0009570//chloroplast stroma;GO:0009522//photosystem I	-	GO:0044237//cellular metabolic process	gi|351727030|ref|NP_001235355.1|/5.09919e-130/photosystem I subunit PsaD [Glycine max]
Glyma.15G194300	-	-	-	-	-	-	-	-	-	-	-	-	-	-	-	-	-1.72283	down	2.15186e-06	0.000108051	1577	ko00195//Photosynthesis;ko01100//Metabolic pathways	GO:0009521	GO:0046906//tetrapyrrole binding	GO:0044237//cellular metabolic process	gi|734325419|gb|KHN05287.1|/2.64334e-76/Photosystem I reaction center subunit psaK, chloroplastic [Glycine soja]
Glyma.20G144700	-	-	-	-	-	-	-	-	-	-	-	-	1.38717	up	1.15521e-05	0.00120882	-1.72407	down	8.99656e-06	0.00032235	2825	ko00195//Photosynthesis;ko01100//Metabolic pathways	GO:0009526//plastid envelope;GO:0031976;GO:0009570//chloroplast stroma;GO:0009522//photosystem I	-	GO:0044237//cellular metabolic process	gi|734361807|gb|KHN15781.1|;gi|947041551|gb|KRG91275.1|/4.18381e-149;2.80762e-107/Photosystem I reaction center subunit II, chloroplastic [Glycine soja] ;hypothetical protein GLYMA_20G144700 [Glycine max]
Glyma.13G299200	-	-	-	-	-	-	-	-	-	-	-	-	-	-	-	-	-1.77712	down	4.72777e-06	0.000200675	982	ko00195//Photosynthesis;ko01100//Metabolic pathways	-	-	GO:0019684//photosynthesis, light reaction	gi|356549934|ref|XP_003543345.1|/3.90749e-87/PREDICTED: photosystem II repair protein PSB27-H1, chloroplastic-like [Glycine max]
Glyma.13G127200	-	-	-	-	-	-	-	-	-	-	-	-	-	-	-	-	-1.80997	down	0.000451956	0.00540859	1027	ko00195//Photosynthesis;ko01100//Metabolic pathways	GO:0009523//photosystem II	-	GO:0044237//cellular metabolic process	gi|734438132|gb|KHN48946.1|/1.42389e-120/Photosystem II reaction center PSB28 protein, chloroplastic [Glycine soja]
Glyma.18G114900	-	-	-	-	-	-	-	-	-	-	-	-	-	-	-	-	-1.86593	down	0.00806673	0.0413148	1323	ko00195//Photosynthesis;ko01100//Metabolic pathways	GO:0009523//photosystem II;GO:0009534//chloroplast thylakoid	GO:0046872//metal ion binding	GO:0044237//cellular metabolic process	gi|734394466|gb|KHN28540.1|/0/Oxygen-evolving enhancer protein 2, chloroplastic [Glycine soja]
Glyma.05G022900	-	-	-	-	-	-	-	-	-	-	-	-	-	-	-	-	-1.87389	down	1.9838e-07	1.79619e-05	1212	ko00195//Photosynthesis;ko01100//Metabolic pathways	GO:0009522//photosystem I	-	-	gi|356511909|ref|XP_003524664.1|/1.03197e-134/PREDICTED: photosystem I reaction center subunit III, chloroplastic [Glycine max]
Glyma.11G181100	-	-	-	-	-	-	-	-	-	-	-	-	1.04059	up	0.00100192	0.0400591	-1.88368	down	6.95571e-06	0.000267364	826	ko00195//Photosynthesis	-	-	-	gi|351734544|ref|NP_001236146.1|/7.06598e-79/uncharacterized protein LOC100305746 [Glycine max]
Glyma.09G087700	-	-	-	-	-	-	-	-	-	-	-	-	-	-	-	-	-1.88511	down	0.000789375	0.00802916	842	ko00195//Photosynthesis;ko01100//Metabolic pathways	GO:0009521	GO:0046906//tetrapyrrole binding	GO:0044237//cellular metabolic process	gi|734421586|gb|KHN41353.1|/8.16956e-79/Photosystem I reaction center subunit psaK, chloroplastic [Glycine soja]
Glyma.17G154900	-	-	-	-	-	-	-	-	-	-	-	-	-	-	-	-	-1.92159	down	0.000126244	0.00220418	950	ko00195//Photosynthesis	GO:0009536//plastid	GO:0051536//iron-sulfur cluster binding;GO:0043169//cation binding	GO:0006091//generation of precursor metabolites and energy	gi|356565441|ref|XP_003550948.1|/9.65017e-122/PREDICTED: ferredoxin-2-like [Glycine max]
Glyma.06G067400	-	-	-	-	-	-	-	-	-	-	-	-	-	-	-	-	-1.93595	down	2.35964e-06	0.000115059	1358	ko00195//Photosynthesis;ko00190//Oxidative phosphorylation;ko01100//Metabolic pathways	GO:0033177//proton-transporting two-sector ATPase complex, proton-transporting domain;GO:0009534//chloroplast thylakoid	GO:1901363;GO:0036094//small molecule binding;GO:0015077//monovalent inorganic cation transmembrane transporter activity;GO:0097159//organic cyclic compound binding	GO:0006818//hydrogen transport;GO:0006754//ATP biosynthetic process	gi|571459243|ref|XP_006581353.1|/5.72054e-113/PREDICTED: ATP synthase subunit b', chloroplastic-like [Glycine max]
Glyma.11G061300	-	-	-	-	-	-	-	-	-	-	-	-	-	-	-	-	-1.9456	down	1.01902e-08	1.571e-06	1703	ko00195//Photosynthesis;ko01100//Metabolic pathways	GO:0031224//intrinsic component of membrane;GO:0009523//photosystem II;GO:0019867//outer membrane	GO:0046872//metal ion binding	GO:0042548//regulation of photosynthesis, light reaction	gi|358249094|ref|NP_001239736.1|/0/uncharacterized protein LOC100798485 [Glycine max]
Glyma.06G020400	-	-	-	-	-	-	-	-	-	-	-	-	-	-	-	-	-1.96409	down	8.06601e-07	5.07838e-05	1253	ko00195//Photosynthesis	GO:0031976;GO:0044436;GO:0044434	-	-	gi|351727401|ref|NP_001238695.1|/2.34942e-87/uncharacterized protein LOC100499708 [Glycine max]
Glyma.05G112100	-	-	-	-	-	-	-	-	-	-	-	-	-	-	-	-	-1.98507	down	8.75496e-07	5.41627e-05	839	ko00195//Photosynthesis	GO:0009536//plastid	GO:0051536//iron-sulfur cluster binding;GO:0043169//cation binding	GO:0006091//generation of precursor metabolites and energy	gi|955320478|ref|XP_003524714.3|;gi|947109880|gb|KRH58206.1|;gi|947109881|gb|KRH58207.1|/3.96943e-122;3.11608e-115;4.2284e-105/PREDICTED: ferredoxin-2-like isoform X2 [Glycine max];hypothetical protein GLYMA_05G112100 [Glycine max];hypothetical protein GLYMA_05G112100 [Glycine max]
Glyma.11G245400	-	-	-	-	-	-	-	-	-	-	-	-	1.7987	up	1.35214e-07	2.51144e-05	-2.0021	down	0.00605427	0.0338046	1001	ko00195//Photosynthesis;ko01100//Metabolic pathways	-	-	-	gi|356540203|ref|XP_003538579.1|/3.7911e-68/PREDICTED: photosystem II core complex proteins psbY, chloroplastic-like [Glycine max]
Glyma.12G092000	-	-	-	-	-	-	-	-	-	-	-	-	-	-	-	-	-2.03023	down	5.95113e-06	0.000236396	831	ko00195//Photosynthesis	-	-	-	gi|571492781|ref|XP_006592347.1|/8.1433e-90/PREDICTED: photosystem I subunit O [Glycine max]
Glyma.02G141700	-	-	-	-	-	-	-	-	-	-	-	-	-	-	-	-	-2.03221	down	2.36591e-06	0.000115151	771	ko00195//Photosynthesis;ko01100//Metabolic pathways	GO:0044424	-	-	gi|947123122|gb|KRH71328.1|/2.16326e-65/hypothetical protein GLYMA_02G141700 [Glycine max]
Glyma.13G129400	-	-	-	-	-	-	-	-	-	-	-	-	-	-	-	-	-2.03927	down	9.93185e-06	0.000345447	757	ko00195//Photosynthesis;ko01100//Metabolic pathways	GO:0044434;GO:0009522//photosystem I	-	-	gi|351722581|ref|NP_001236993.1|/5.52099e-62/uncharacterized protein LOC100526993 [Glycine max]
Glyma.14G031800	-	-	-	-	-	-	-	-	-	-	-	-	-	-	-	-	-2.07776	down	1.31808e-07	1.29796e-05	1121	ko00195//Photosynthesis;ko01100//Metabolic pathways	GO:0009532//plastid stroma;GO:0009526//plastid envelope;GO:0009534//chloroplast thylakoid;GO:0009523//photosystem II;GO:0005576//extracellular region	GO:0008187//poly-pyrimidine tract binding;GO:0046872//metal ion binding	GO:0009617//response to bacterium;GO:0044237//cellular metabolic process	gi|214011454|gb|ACJ61477.1|/0/oxygen-evolving enhancer protein 2 [Glycine max]
Glyma.03G114600	-	-	-	-	-	-	-	-	-	-	-	-	-	-	-	-	-2.0798	down	5.46404e-06	0.000222024	1073	ko00195//Photosynthesis;ko01100//Metabolic pathways	GO:0009523//photosystem II	GO:0046872//metal ion binding	GO:0044237//cellular metabolic process	gi|351727615|ref|NP_001236143.1|/6.80492e-156/uncharacterized protein LOC100499794 [Glycine max]
Glyma.06G321900	-1.01824	down	2.38252e-07	1.1349e-05	-	-	-	-	-	-	-	-	-	-	-	-	-2.07987	down	1.52958e-07	1.46886e-05	785	ko00195//Photosynthesis;ko01100//Metabolic pathways	GO:0009522//photosystem I;GO:0009526//plastid envelope;GO:0031976	GO:0046906//tetrapyrrole binding	GO:0009767//photosynthetic electron transport chain;GO:0031647//regulation of protein stability;GO:0042548//regulation of photosynthesis, light reaction;GO:0006740//NADPH regeneration	gi|351725243|ref|NP_001235038.1|/2.09257e-113/uncharacterized protein LOC100499718 [Glycine max]
Glyma.07G112000	-	-	-	-	-	-	-	-	-	-	-	-	-	-	-	-	-2.11646	down	5.57246e-08	6.5947e-06	1062	ko00195//Photosynthesis;ko01100//Metabolic pathways	GO:0031976;GO:0009523//photosystem II;GO:0009532//plastid stroma	GO:0046872//metal ion binding	GO:0044237//cellular metabolic process	gi|214011474|gb|ACJ61487.1|;gi|947100285|gb|KRH48777.1|/3.30313e-153;7.43809e-146/oxygen-evolving enhancer protein 3 [Glycine max] ;hypothetical protein GLYMA_07G112000 [Glycine max]
Glyma.02G282500	-	-	-	-	-	-	-	-	-	-	-	-	-	-	-	-	-2.17208	down	3.91364e-08	4.96093e-06	1217	ko00195//Photosynthesis;ko01100//Metabolic pathways	GO:0009532//plastid stroma;GO:0009526//plastid envelope;GO:0009534//chloroplast thylakoid;GO:0009523//photosystem II;GO:0005576//extracellular region	GO:0008187//poly-pyrimidine tract binding;GO:0046872//metal ion binding	GO:0009617//response to bacterium;GO:0044237//cellular metabolic process	gi|734416475|gb|KHN38354.1|/0/Oxygen-evolving enhancer protein 2, chloroplastic [Glycine soja]
Glyma.10G042000	-	-	-	-	-	-	-	-	-	-	-	-	-	-	-	-	-2.21287	down	1.9911e-05	0.000582443	820	ko00195//Photosynthesis;ko01100//Metabolic pathways	GO:0044434;GO:0009522//photosystem I	-	-	gi|947083556|gb|KRH32277.1|/3.15973e-97/hypothetical protein GLYMA_10G042000 [Glycine max]
Glyma.12G199400	-	-	-	-	-	-	-	-	-	-	-	-	-	-	-	-	-2.23905	down	1.57813e-08	2.27323e-06	1088	ko00195//Photosynthesis;ko01100//Metabolic pathways	GO:0031224//intrinsic component of membrane;GO:0009526//plastid envelope;GO:0031976;GO:0034357	GO:0043169//cation binding;GO:0015078//hydrogen ion transmembrane transporter activity;GO:0051536//iron-sulfur cluster binding;GO:0009055//electron carrier activity;GO:0052880	GO:1990066;GO:0044710;GO:0009617//response to bacterium;GO:0044237//cellular metabolic process;GO:0015992//proton transport	gi|734321874|gb|KHN04299.1|/1.5483e-156/Cytochrome b6-f complex iron-sulfur subunit, chloroplastic [Glycine soja]
Glyma.13G357300	-	-	-	-	-	-	-	-	-	-	-	-	1.34091	up	5.39907e-06	0.000619497	-2.34939	down	1.61432e-07	1.53987e-05	1254	ko00195//Photosynthesis;ko01100//Metabolic pathways	GO:0031976;GO:0009570//chloroplast stroma;GO:0009522//photosystem I	-	GO:0044237//cellular metabolic process	gi|734403802|gb|KHN32624.1|/2.63003e-70/Photosystem I reaction center subunit VI, chloroplastic [Glycine soja]
Glyma.07G019700	-	-	-	-	-	-	-	-	-	-	-	-	-	-	-	-	-2.3656	down	0.00013923	0.0023679	884	ko00195//Photosynthesis;ko01100//Metabolic pathways	GO:0031976;GO:0009570//chloroplast stroma;GO:0009522//photosystem I	-	GO:0044237//cellular metabolic process	gi|351726538|ref|NP_001236618.1|;gi|571463893|ref|XP_006582847.1|/1.42596e-73;1.51029e-78/uncharacterized protein LOC100499832 [Glycine max];PREDICTED: uncharacterized protein LOC100499832 isoform X1 [Glycine max]
Glyma.13G204800	-	-	-	-	-	-	-	-	-	-	-	-	-	-	-	-	-2.47268	down	5.25923e-05	0.00116912	1800	ko00195//Photosynthesis;ko00190//Oxidative phosphorylation;ko01100//Metabolic pathways	GO:0033178//proton-transporting two-sector ATPase complex, catalytic domain	GO:0015078//hydrogen ion transmembrane transporter activity;GO:0019829//cation-transporting ATPase activity	GO:0006754//ATP biosynthetic process	gi|734415192|gb|KHN37604.1|/0/ATP synthase gamma chain, chloroplastic [Glycine soja]
Glyma.15G107900	-	-	-	-	-	-	-	-	-	-	-	-	-	-	-	-	-2.49951	down	4.16078e-10	1.0691e-07	1892	ko00195//Photosynthesis;ko00190//Oxidative phosphorylation;ko01100//Metabolic pathways	GO:0033178//proton-transporting two-sector ATPase complex, catalytic domain	GO:0015078//hydrogen ion transmembrane transporter activity;GO:0019829//cation-transporting ATPase activity	GO:0006754//ATP biosynthetic process	gi|734404516|gb|KHN33027.1|/0/ATP synthase gamma chain, chloroplastic [Glycine soja]
Glyma.12G169600	-	-	-	-	-	-	-	-	-	-	-	-	-	-	-	-	-2.5352	down	6.81889e-07	4.51233e-05	889	ko00195//Photosynthesis	GO:0009536//plastid	GO:0051536//iron-sulfur cluster binding	GO:0022900//electron transport chain	gi|356543418|ref|XP_003540157.1|/6.45877e-93/PREDICTED: ferredoxin-A-like [Glycine max]
Glyma.04G020300	-	-	-	-	-	-	-	-	-	-	-	-	-	-	-	-	-2.55734	down	1.76374e-09	3.78224e-07	1273	ko00195//Photosynthesis	GO:0031976;GO:0044436;GO:0044434	GO:0046872//metal ion binding	-	gi|734406057|gb|KHN33826.1|/1.33719e-85/Plastocyanin, chloroplastic [Glycine soja]
Glyma.12G169500	-	-	-	-	-	-	-	-	-	-	-	-	1.17486	up	0.000722701	0.0313079	-3.19901	down	3.16107e-08	4.25268e-06	881	ko00195//Photosynthesis	GO:0009536//plastid	GO:0051536//iron-sulfur cluster binding	GO:0044710	gi|351723843|ref|NP_001237037.1|/2.17897e-93/uncharacterized protein LOC100500372 [Glycine max]
Glyma.02G184000	1.45087	up	0.000175974	0.0031434	2.18905	up	2.86481e-07	3.74838e-05	1.89131	up	0.00124294	0.045963	-	-	-	-	-4.10146	down	4.19177e-07	3.14614e-05	461	ko00195//Photosynthesis;ko00190//Oxidative phosphorylation;ko01100//Metabolic pathways	GO:0033178//proton-transporting two-sector ATPase complex, catalytic domain;GO:0009534//chloroplast thylakoid	GO:0032550;GO:0019829//cation-transporting ATPase activity;GO:0015078//hydrogen ion transmembrane transporter activity	GO:0015986//ATP synthesis coupled proton transport	gi|947123790|gb|KRH71996.1|/1.26336e-85/hypothetical protein GLYMA_02G184000, partial [Glycine max]
Glyma.08G082900	-	-	-	-	-	-	-	-	-	-	-	-	2.15566	up	5.6645e-07	8.76759e-05	-	-	-	-	1357	ko01100//Metabolic pathways;ko00196//Photosynthesis - antenna proteins	GO:0009521;GO:0031224//intrinsic component of membrane;GO:0009534//chloroplast thylakoid	GO:0046906//tetrapyrrole binding;GO:0043169//cation binding	GO:0006464//cellular protein modification process;GO:0006091//generation of precursor metabolites and energy	gi|359806638|ref|NP_001241277.1|/0/chlorophyll a-b binding protein 3, chloroplastic-like [Glycine max]
Glyma.16G162600	-	-	-	-	-	-	-	-	-	-	-	-	2.70875	up	6.86245e-05	0.0053387	-	-	-	-	511	ko01100//Metabolic pathways;ko00196//Photosynthesis - antenna proteins	GO:0009521;GO:0031224//intrinsic component of membrane;GO:0009534//chloroplast thylakoid	GO:0046906//tetrapyrrole binding;GO:0043169//cation binding	GO:0006464//cellular protein modification process;GO:0006091//generation of precursor metabolites and energy	gi|947059228|gb|KRH08634.1|/2.29509e-86/hypothetical protein GLYMA_16G162600, partial [Glycine max]
Glyma.16G165800	-1.60617	down	7.1803e-10	5.97915e-08	-	-	-	-	-	-	-	-	2.70675	up	4.4841e-12	1.43289e-09	-	-	-	-	1884	ko01100//Metabolic pathways;ko00196//Photosynthesis - antenna proteins	GO:0009521;GO:0031976	GO:0043169//cation binding	GO:0006091//generation of precursor metabolites and energy	gi|358248490|ref|NP_001240146.1|/0/chlorophyll a-b binding protein 21, chloroplastic-like [Glycine max]
Glyma.05G128000	-	-	-	-	-	-	-	-	-	-	-	-	2.23169	up	2.27966e-06	0.000286436	-1.09867	down	0.00636889	0.0349927	1131	ko01100//Metabolic pathways;ko00196//Photosynthesis - antenna proteins	GO:0009521;GO:0031224//intrinsic component of membrane;GO:0009534//chloroplast thylakoid	GO:0046906//tetrapyrrole binding;GO:0043169//cation binding	GO:0006464//cellular protein modification process;GO:0006091//generation of precursor metabolites and energy	gi|255646685|gb|ACU23816.1|/0/unknown [Glycine max]
Glyma.15G052400	-	-	-	-	-	-	-	-	-	-	-	-	-	-	-	-	-1.13593	down	0.000407725	0.00503976	1645	ko01100//Metabolic pathways;ko00196//Photosynthesis - antenna proteins	GO:0009526//plastid envelope;GO:0009570//chloroplast stroma;GO:0009534//chloroplast thylakoid	-	GO:1990066;GO:0006091//generation of precursor metabolites and energy	gi|734405712|gb|KHN33514.1|/1.20949e-173/Chlorophyll a-b binding protein CP24 10A, chloroplastic [Glycine soja]
Glyma.16G205200	-	-	-	-	-	-	-	-	-	-	-	-	-	-	-	-	-1.31785	down	0.00100192	0.00951252	1338	ko01100//Metabolic pathways;ko00196//Photosynthesis - antenna proteins	GO:0009503;GO:0009523//photosystem II;GO:0009570//chloroplast stroma	GO:0043169//cation binding	GO:1990066;GO:0009639//response to red or far red light;GO:0006091//generation of precursor metabolites and energy	gi|734384942|gb|KHN24427.1|/8.97488e-165/Chlorophyll a-b binding protein CP26, chloroplastic [Glycine soja]
Glyma.12G219300	-	-	-	-	-	-	-	-	-	-	-	-	-	-	-	-	-1.39078	down	0.000613687	0.00677884	1237	ko01100//Metabolic pathways;ko00196//Photosynthesis - antenna proteins	GO:0009521;GO:0009536//plastid	GO:0043169//cation binding	GO:0006091//generation of precursor metabolites and energy	gi|359807444|ref|NP_001240880.1|/0/uncharacterized protein LOC100779387 [Glycine max]
Glyma.08G180000	-	-	-	-	-	-	-	-	-	-	-	-	-	-	-	-	-1.41356	down	5.46623e-05	0.00120533	1328	ko01100//Metabolic pathways;ko00196//Photosynthesis - antenna proteins	GO:0009526//plastid envelope;GO:0009570//chloroplast stroma;GO:0009534//chloroplast thylakoid	-	GO:1990066;GO:0006091//generation of precursor metabolites and energy	gi|734390448|gb|KHN26736.1|/4.09065e-174/Chlorophyll a-b binding protein CP24 10A, chloroplastic [Glycine soja]
Glyma.03G262300	-	-	-	-	-	-	-	-	-	-	-	-	-	-	-	-	-1.46953	down	9.52649e-05	0.00180775	1398	ko00196//Photosynthesis - antenna proteins	GO:0009521;GO:0009534//chloroplast thylakoid	GO:0043169//cation binding	GO:0006091//generation of precursor metabolites and energy	gi|947120744|gb|KRH68993.1|;gi|358249066|ref|NP_001239987.1|/0;0/hypothetical protein GLYMA_03G262300 [Glycine max];uncharacterized protein LOC100794944 [Glycine max]
Glyma.05G119000	-	-	-	-	-	-	-	-	-	-	-	-	-	-	-	-	-1.47592	down	0.00908583	0.0448658	732	ko01100//Metabolic pathways;ko00196//Photosynthesis - antenna proteins	GO:0009536//plastid	-	GO:0006091//generation of precursor metabolites and energy	gi|947109970|gb|KRH58296.1|/2.40783e-163/hypothetical protein GLYMA_05G119000 [Glycine max]
Glyma.06G194900	-	-	-	-	-	-	-	-	-	-	-	-	-	-	-	-	-1.48084	down	3.1167e-05	0.000815517	1114	ko00196//Photosynthesis - antenna proteins	GO:0009521;GO:0009526//plastid envelope;GO:0031976;GO:0009570//chloroplast stroma	GO:0043169//cation binding	GO:0009628//response to abiotic stimulus;GO:0006091//generation of precursor metabolites and energy	gi|734389434|gb|KHN26254.1|/0/Chlorophyll a-b binding protein P4, chloroplastic [Glycine soja]
Glyma.14G008000	-	-	-	-	-	-	-	-	-	-	-	-	-	-	-	-	-1.50943	down	4.07446e-05	0.000976267	1200	ko01100//Metabolic pathways;ko00196//Photosynthesis - antenna proteins	GO:0009521;GO:0031224//intrinsic component of membrane;GO:0009526//plastid envelope;GO:0044437;GO:0009534//chloroplast thylakoid;GO:0009570//chloroplast stroma	GO:0043169//cation binding;GO:0046906//tetrapyrrole binding	GO:0006091//generation of precursor metabolites and energy;GO:0006464//cellular protein modification process;GO:0009639//response to red or far red light	gi|359806053|ref|NP_001241179.1|/0/uncharacterized protein LOC100815789 [Glycine max]
Glyma.14G003400	-	-	-	-	-	-	-	-	-	-	-	-	-	-	-	-	-1.57498	down	5.6489e-06	0.000226919	1290	ko00196//Photosynthesis - antenna proteins	GO:0009521;GO:0009507//chloroplast	GO:0043169//cation binding	GO:0006091//generation of precursor metabolites and energy	gi|734433643|gb|KHN46884.1|/3.8163e-165/Chlorophyll a-b binding protein 3, chloroplastic [Glycine soja]
Glyma.13G282000	-	-	-	-	-	-	-	-	-	-	-	-	-	-	-	-	-1.86718	down	2.15801e-06	0.000108066	1245	ko01100//Metabolic pathways;ko00196//Photosynthesis - antenna proteins	GO:0009521;GO:0009536//plastid	GO:0043169//cation binding	GO:0006091//generation of precursor metabolites and energy	gi|359806176|ref|NP_001241200.1|/0/uncharacterized protein LOC100790960 [Glycine max]
Glyma.10G177200	-	-	-	-	-	-	-	-	-	-	-	-	-	-	-	-	-1.87394	down	1.02815e-06	6.02135e-05	1123	ko01100//Metabolic pathways;ko00196//Photosynthesis - antenna proteins	GO:0009503;GO:0009523//photosystem II;GO:0009570//chloroplast stroma	GO:0043169//cation binding	GO:1990066;GO:0009639//response to red or far red light;GO:0006091//generation of precursor metabolites and energy	gi|356535308|ref|XP_003536189.1|/6.78912e-163/PREDICTED: chlorophyll a-b binding protein CP26, chloroplastic [Glycine max]
Glyma.07G047600	-	-	-	-	-	-	-	-	-	-	-	-	-	-	-	-	-1.89865	down	1.9821e-06	0.000102043	1400	ko00196//Photosynthesis - antenna proteins	GO:0009521;GO:0009534//chloroplast thylakoid	GO:0043169//cation binding	GO:0006091//generation of precursor metabolites and energy	gi|734313594|gb|KHN01491.1|;gi|947099250|gb|KRH47742.1|/0;0/Chlorophyll a-b binding protein 7, chloroplastic [Glycine soja] ;hypothetical protein GLYMA_07G047600 [Glycine max]
Glyma.20G212900	-	-	-	-	-	-	-	-	-	-	-	-	-	-	-	-	-2.01169	down	3.3766e-05	0.000866823	1076	ko01100//Metabolic pathways;ko00196//Photosynthesis - antenna proteins	GO:0009503;GO:0009523//photosystem II;GO:0009570//chloroplast stroma	GO:0043169//cation binding	GO:1990066;GO:0009639//response to red or far red light;GO:0006091//generation of precursor metabolites and energy	gi|734324257|gb|KHN05032.1|/7.10859e-173/Chlorophyll a-b binding protein CP26, chloroplastic [Glycine soja]
Glyma.02G309500	-	-	-	-	-	-	-	-	-	-	-	-	-	-	-	-	-2.03837	down	3.98659e-08	5.00888e-06	1945	ko00196//Photosynthesis - antenna proteins	GO:0009521;GO:0009507//chloroplast	GO:0043169//cation binding	GO:0006091//generation of precursor metabolites and energy	gi|734396929|gb|KHN29869.1|/5.17725e-165/Chlorophyll a-b binding protein 3, chloroplastic [Glycine soja]
Glyma.02G064700	-	-	-	-	-	-	-	-	-	-	-	-	-	-	-	-	-2.07933	down	6.01536e-07	4.0655e-05	2033	ko00196//Photosynthesis - antenna proteins	GO:0009521;GO:0009536//plastid	GO:0043169//cation binding	GO:0006091//generation of precursor metabolites and energy	gi|947121839|gb|KRH70045.1|;gi|947121840|gb|KRH70046.1|;gi|734312433|gb|KHN00611.1|/3.16771e-162;3.01752e-138;7.33888e-176/hypothetical protein GLYMA_02G064700 [Glycine max];hypothetical protein GLYMA_02G064700 [Glycine max];Chlorophyll a-b binding protein 6A, chloroplastic [Glycine soja]
Glyma.16G145800	-	-	-	-	-	-	-	-	-	-	-	-	-	-	-	-	-2.08016	down	2.09363e-06	0.000106187	1161	ko00196//Photosynthesis - antenna proteins	GO:0009521;GO:0009536//plastid	GO:0043169//cation binding	GO:0006091//generation of precursor metabolites and energy	gi|955376843|ref|XP_006599410.2|/2.30353e-164/PREDICTED: chlorophyll a-b binding protein 6A, chloroplastic [Glycine max]
Glyma.09G154700	-	-	-	-	-	-	-	-	-	-	-	-	1.16335	up	0.000718461	0.0311993	-2.08745	down	2.43698e-06	0.000118005	1191	ko01100//Metabolic pathways;ko00196//Photosynthesis - antenna proteins	GO:0009503;GO:0009523//photosystem II;GO:0009570//chloroplast stroma	GO:0043169//cation binding	GO:1990066;GO:0009639//response to red or far red light;GO:0006091//generation of precursor metabolites and energy	gi|734392935|gb|KHN27863.1|/2.73903e-164/Chlorophyll a-b binding protein CP26, chloroplastic [Glycine soja]
Glyma.18G028400	-	-	-	-	-	-	-	-	-	-	-	-	-	-	-	-	-2.16459	down	3.76406e-07	2.88588e-05	1218	ko01100//Metabolic pathways;ko00196//Photosynthesis - antenna proteins	GO:0009536//plastid	-	GO:0009639//response to red or far red light;GO:0006091//generation of precursor metabolites and energy	gi|356568441|ref|XP_003552419.1|/2.48927e-167/PREDICTED: chlorophyll a-b binding protein CP29.3, chloroplastic-like [Glycine max]
Glyma.08G074000	-	-	-	-	-	-	-	-	-	-	-	-	-	-	-	-	-2.36292	down	8.29788e-10	2.02277e-07	1090	ko01100//Metabolic pathways;ko00196//Photosynthesis - antenna proteins	GO:0009536//plastid	-	GO:0006091//generation of precursor metabolites and energy	gi|734417899|gb|KHN39211.1|/0/Chlorophyll a-b binding protein CP24 10A, chloroplastic [Glycine soja]
Glyma.02G305400	-	-	-	-	-	-	-	-	-	-	-	-	-	-	-	-	-2.79836	down	3.57482e-12	1.73648e-09	1322	ko01100//Metabolic pathways;ko00196//Photosynthesis - antenna proteins	GO:0009521;GO:0009526//plastid envelope;GO:0009570//chloroplast stroma;GO:0009534//chloroplast thylakoid;GO:0044437;GO:0031224//intrinsic component of membrane	GO:0043169//cation binding;GO:0046906//tetrapyrrole binding	GO:0009639//response to red or far red light;GO:0006091//generation of precursor metabolites and energy;GO:0006464//cellular protein modification process	gi|947125798|gb|KRH74004.1|;gi|358248712|ref|NP_001240183.1|/1.06595e-163;0/hypothetical protein GLYMA_02G305400 [Glycine max];chlorophyll a-b binding protein 151, chloroplastic-like [Glycine max]
Glyma.09G071400	-	-	-	-	-	-	-	-	-	-	-	-	-	-	-	-	-4.06161	down	7.45837e-07	4.82359e-05	1434	ko00196//Photosynthesis - antenna proteins	GO:0009521;GO:0009536//plastid	GO:0043169//cation binding	GO:0009639//response to red or far red light;GO:0006091//generation of precursor metabolites and energy	gi|734350123|gb|KHN12296.1|/0/Chlorophyll a-b binding protein, chloroplastic [Glycine soja]
